# Supplementary material for: Prioritizing Causal Risk Factors for Severe&nbsp;COVID-19: An Exhaustive Mendelian Randomization Study
Source: Research Square preprint supplement (doi:10.21203/rs.3.rs-149087/v1), 2021-01-25
Supplement: Supplementary file 1 [file 2a4cb46e2abea995bf249449.xlsx]

## Sheet: Table S2
Table S2. Details of the datasets used in the present Mendelian randomization study.
Batch	Description	Count	Web source
ebi-a	Datasets that satisfy minimum requirements imported from the EBI database of complete GWAS summary data	208	https://www.ebi.ac.uk/gwas/downloads/summary-statistics
finn-a	FinnGen biobank analysis	1485	https://www.finngen.fi/fi
ieu-a	GWAS summary datasets generated by many different consortia that have been manually collected and curated, initially developed for MR-Base	312	https://elifesciences.org/articles/34408
ieu-b	GWAS summary datasets generated by many different consortia that have been manually collected and curated, initially developed for MR-Base (round 2)	13	https://elifesciences.org/articles/34408
met-a	Human blood metabolites analyzed by Shin et al 2014	452	https://pubmed.ncbi.nlm.nih.gov/24816252/
met-b	Human immune system traits analyzed by Roederer et al 2015	150	https://www.ncbi.nlm.nih.gov/pmc/articles/PMC4393780/
met-c	Circulating metabolites analyzed by Kettunen et al 2016	123	https://pubmed.ncbi.nlm.nih.gov/27005778/
prot-a	Complete GWAS summary data on protein levels as described by Sun et al 2018	3282	https://pubmed.ncbi.nlm.nih.gov/29875488/
prot-b	Complete GWAS summary data on protein levels as described by Folkersen et al 2017	83	https://www.ncbi.nlm.nih.gov/pmc/articles/PMC5393901/
prot-c	Complete GWAS summary data on protein levels as described by Suhre et al 2017	1124	https://pubmed.ncbi.nlm.nih.gov/28240269/
ubm-a	Complete GWAS summary data on brain region volumes as described by Elliott et al 2018	3143	https://pubmed.ncbi.nlm.nih.gov/30305740/
ukb-a	Neale lab analysis of UK Biobank phenotypes, round 1	596	http://www.nealelab.is/blog/2017/7/19/rapid-gwas-of-thousands-of-phenotypes-for-337000-samples-in-the-uk-biobank
ukb-b	IEU analysis of UK Biobank phenotypes	2514	https://data.bris.ac.uk/data/dataset/pnoat8cxo0u52p6ynfaekeigi
ukb-d	Neale lab analysis of UK Biobank phenotypes, round 2	838	http://www.nealelab.is/uk-biobank

## Sheet: Table S3
Table S3. Dataset information of all traits included in our MR analysis.
GWAS ID	trait	priority	subcategory	category	sample_size	nsnp	year	consortium	author	pmid	sex	population	ncase	ncontrol	sd	unit	note
ukb-d-M13_ARTHROSIS	#Arthrosis	0	NA	Binary	361194	13586589	2018	NA	Neale lab	NA	Males and Females	European	24977	336217	NA	NA	NA
ukb-d-M13_OTHERJOINT	#Other joint disorders	0	NA	Binary	361194	13586589	2018	NA	Neale lab	NA	Males and Females	European	27347	333847	NA	NA	NA
finn-a-M13_NECROVASC	#Other necrotizing vasculopathies	0	NA	Binary	94036	16152119	2020	NA	NA	NA	Males and Females	European	289	94550	NA	NA	NA
finn-a-M13_OTHCONN	#Other systemic involvement of connective tissue	0	NA	Binary	94036	16152119	2020	NA	NA	NA	Males and Females	European	1500	94550	NA	NA	NA
ukb-d-M13_POLYARTHROPATHIES	#Polyarthropathies	0	NA	Binary	361194	11300513	2018	NA	Neale lab	NA	Males and Females	European	3275	357919	NA	NA	NA
ukb-d-M13_SPONDYLOPATHY	#Spondylopathies	0	NA	Binary	361194	11812707	2018	NA	Neale lab	NA	Males and Females	European	4393	356801	NA	NA	NA
finn-a-K11_ABSCANAL	Abscess of anal and rectal regions	0	NA	Binary	94036	16152119	2020	NA	NA	NA	Males and Females	European	468	82769	NA	NA	NA
finn-a-N14_BARTHOABSCESS	Abscess of Bartholin gland	0	NA	Binary	94036	16152119	2020	NA	NA	NA	Males and Females	European	136	49639	NA	NA	NA
finn-a-M13_ACHILLESTEND	Achilles tendinitis	0	NA	Binary	94036	16152119	2020	NA	NA	NA	Males and Females	European	654	74589	NA	NA	NA
finn-a-L12_ACNE	Acne	0	NA	Binary	94036	16152119	2020	NA	NA	NA	Males and Females	European	450	93570	NA	NA	NA
finn-a-L12_ACNE_VULGARIS	Acne vulgaris	0	NA	Binary	94036	16152119	2020	NA	NA	NA	Males and Females	European	383	93570	NA	NA	NA
finn-a-ALCOPANCACU	Acohol-induced acute pancreatitis	0	NA	Binary	94036	16152119	2020	NA	NA	NA	Males and Females	European	156	96343	NA	NA	NA
ukb-d-L12_ACTINKERA	Actinic keratosis	0	NA	Binary	361194	9790362	2018	NA	Neale lab	NA	Males and Females	European	1349	359845	NA	NA	NA
finn-a-L12_ACTINKERA	Actinic keratosis	0	NA	Binary	94036	16152119	2020	NA	NA	NA	Males and Females	European	1526	94683	NA	NA	NA
ukb-d-20554_3	Actions taken following self-harm: Need hospital treatment (eg A&E)	0	NA	Binary	117733	10553032	2018	NA	Neale lab	NA	Males and Females	European	2125	115608	NA	NA	NA
ukb-d-20554_6	Actions taken following self-harm: Receive help from friends / family / neighbours	0	NA	Binary	117733	9914393	2018	NA	Neale lab	NA	Males and Females	European	1453	116280	NA	NA	NA
ukb-d-20554_1	Actions taken following self-harm: See anyone from psychiatric or mental health services, including liaison services	0	NA	Binary	117733	10169094	2018	NA	Neale lab	NA	Males and Females	European	1693	116040	NA	NA	NA
ukb-d-20554_5	Actions taken following self-harm: See own GP	0	NA	Binary	117733	9663418	2018	NA	Neale lab	NA	Males and Females	European	1249	116484	NA	NA	NA
ukb-d-20550_3	Activities undertaken to treat anxiety: Other therapeutic activities such as mindfulness, yoga or art classes	0	NA	Binary	98990	12282663	2018	NA	Neale lab	NA	Males and Females	European	5735	93255	NA	NA	NA
ukb-d-20550_1	Activities undertaken to treat anxiety: Talking therapies, such as psychotherapy, counselling, group therapy or CBT	0	NA	Binary	98990	13569194	2018	NA	Neale lab	NA	Males and Females	European	12858	86132	NA	NA	NA
ukb-d-20547_3	Activities undertaken to treat depression: Other therapeutic activities such as mindfulness, yoga or art classes	0	NA	Binary	117763	13120563	2018	NA	Neale lab	NA	Males and Females	European	9199	108564	NA	NA	NA
ukb-d-20547_1	Activities undertaken to treat depression: Talking therapies, such as psychotherapy, counselling, group therapy or CBT	0	NA	Binary	117763	13571578	2018	NA	Neale lab	NA	Males and Females	European	25960	91803	NA	NA	NA
finn-a-F5_ALCOHOLAC	Acute alcohol intoxication	0	NA	Binary	94036	16152119	2020	NA	NA	NA	Males and Females	European	2792	91136	NA	NA	NA
finn-a-ALCOHOLACUTE10	Acute alcohol intoxication	0	NA	Binary	94036	16152119	2020	NA	NA	NA	Males and Females	European	1264	95235	NA	NA	NA
finn-a-ALCOHOLACUTE9	Acute alcohol intoxication ICD-9 (inculed in Swedish definition)	0	NA	Binary	94036	16152119	2020	NA	NA	NA	Males and Females	European	310	96189	NA	NA	NA
finn-a-H7_IRIDOACUTE	Acute and subacute iridocyclitis	0	NA	Binary	94036	16152119	2020	NA	NA	NA	Males and Females	European	1269	92767	NA	NA	NA
finn-a-F5_PSYTRANS	Acute and transient psychotic disorders	0	NA	Binary	94036	16152119	2020	NA	NA	NA	Males and Females	European	1629	91492	NA	NA	NA
finn-a-K11_APPENDACUT	Acute appendicitis	0	NA	Binary	94036	16152119	2020	NA	NA	NA	Males and Females	European	6748	89199	NA	NA	NA
finn-a-J10_BRONCHIOLITIS	Acute bronchiolitis	0	NA	Binary	94036	16152119	2020	NA	NA	NA	Males and Females	European	184	92890	NA	NA	NA
finn-a-J10_BRONCHITIS	Acute bronchitis	0	NA	Binary	94036	16152119	2020	NA	NA	NA	Males and Females	European	2629	92890	NA	NA	NA
finn-a-K11_ACUTGASTR	Acute gastritis	0	NA	Binary	94036	16152119	2020	NA	NA	NA	Males and Females	European	546	85160	NA	NA	NA
finn-a-J10_LARYNGITIS	Acute laryngitis and tracheitis	0	NA	Binary	94036	16152119	2020	NA	NA	NA	Males and Females	European	797	82135	NA	NA	NA
finn-a-L12_LYMPHADENITIS	Acute lymphadenitis	0	NA	Binary	94036	16152119	2020	NA	NA	NA	Males and Females	European	371	92819	NA	NA	NA
finn-a-J10_COLD	Acute nasopharyngitis(common cold)	0	NA	Binary	94036	16152119	2020	NA	NA	NA	Males and Females	European	1119	82135	NA	NA	NA
finn-a-N14_ACUTENEPHRITIC	Acute nephritic syndrome	0	NA	Binary	94036	16152119	2020	NA	NA	NA	Males and Females	European	131	94998	NA	NA	NA
finn-a-PANCREATITIS	Acute pancreatis (for exclusion)	0	NA	Binary	94036	16152119	2020	NA	NA	NA	Males and Females	European	1091	95341	NA	NA	NA
finn-a-K11_ACUTPANC	Acute pancreatitis	0	NA	Binary	94036	16152119	2020	NA	NA	NA	Males and Females	European	1091	87135	NA	NA	NA
finn-a-K11_PERITONITIS	Acute peritonitis	0	NA	Binary	94036	16152119	2020	NA	NA	NA	Males and Females	European	313	95888	NA	NA	NA
finn-a-J10_PHARYNGITIS	Acute pharyngitis	0	NA	Binary	94036	16152119	2020	NA	NA	NA	Males and Females	European	832	82135	NA	NA	NA
finn-a-D3_ACUTEPOSTBLEEDANAEMIA	Acute posthaemorrhagic anaemia	0	NA	Binary	94036	16152119	2020	NA	NA	NA	Males and Females	European	176	94380	NA	NA	NA
finn-a-N14_ACUTERENFAIL	Acute renal failure	0	NA	Binary	94036	16152119	2020	NA	NA	NA	Males and Females	European	584	94913	NA	NA	NA
finn-a-J10_SINUSITIS	Acute sinusitis	0	NA	Binary	94036	16152119	2020	NA	NA	NA	Males and Females	European	4276	82135	NA	NA	NA
finn-a-H8_SUP_ACUTE	Acute suppurative otitis media	0	NA	Binary	94036	16152119	2020	NA	NA	NA	Males and Females	European	1782	92308	NA	NA	NA
finn-a-N14_PYELONEPHR	Acute tubulo-interstitial nephritis	0	NA	Binary	94036	16152119	2020	NA	NA	NA	Males and Females	European	4038	91563	NA	NA	NA
finn-a-J10_UPPERINFEC	Acute upper respiratory infections	0	NA	Binary	94036	16152119	2020	NA	NA	NA	Males and Females	European	14364	82135	NA	NA	NA
finn-a-J10_ACUTEUPPERINFEC	Acute upper respiratory infections of multiple and unspecified sites	0	NA	Binary	94036	16152119	2020	NA	NA	NA	Males and Females	European	6932	82135	NA	NA	NA
ukb-d-M13_ADHCAPSULITIS	Adhesive capsulitis of shoulder	0	NA	Binary	361194	9594137	2018	NA	Neale lab	NA	Males and Females	European	1198	359996	NA	NA	NA
finn-a-M13_ADHCAPSULITIS	Adhesive capsulitis of shoulder	0	NA	Binary	94036	16152119	2020	NA	NA	NA	Males and Females	European	1214	76986	NA	NA	NA
ukb-b-13183	Adopted as a child	1	NA	Binary	461805	9851867	2018	MRC-IEU	Ben Elsworth	NA	Males and Females	European	6661	455144	NA	SD	1767: Output from GWAS pipeline using Phesant derived variables from UKBiobank
ukb-d-3942	Adopted mother still alive	0	NA	Binary	3812	9421415	2018	NA	Neale lab	NA	Males and Females	European	1078	2734	NA	NA	NA
ukb-d-STILL_ADULT	Adult-onset Still disease	0	NA	Binary	361194	9950919	2018	NA	Neale lab	NA	Males and Females	European	1486	359708	NA	NA	NA
finn-a-STILL_ADULT	Adult-onset Still disease	0	NA	Binary	94036	16152119	2020	NA	NA	NA	Males and Females	European	1255	89105	NA	NA	NA
finn-a-D3_AGRANULOCYTOSIS	Agranulocytosis	0	NA	Binary	94036	16152119	2020	NA	NA	NA	Males and Females	European	456	95634	NA	NA	NA
ukb-b-11158	Aide-memoire completed	1	NA	Binary	462933	9851867	2018	MRC-IEU	Ben Elsworth	NA	Males and Females	European	370230	92703	NA	SD	111: Output from GWAS pipeline using Phesant derived variables from UKBiobank
finn-a-KRA_PSY_ALCOH	Alcohol abuse, main dg	0	NA	Binary	94036	16152119	2020	NA	NA	NA	Males and Females	European	1019	91254	NA	NA	NA
ukb-b-10923	Alcohol consumed	1	NA	Binary	64949	9851867	2018	MRC-IEU	Ben Elsworth	NA	Males and Females	European	31833	33116	NA	SD	100580: Output from GWAS pipeline using Phesant derived variables from UKBiobank
ukb-d-20117_2	Alcohol drinker status: Current	0	NA	Binary	360726	13586591	2018	NA	Neale lab	NA	Males and Females	European	336919	23807	NA	NA	NA
finn-a-ALCOHOL_RELATED	Alcohol related diseases and deaths, all endoints	0	NA	Binary	94036	16152119	2020	NA	NA	NA	Males and Females	European	5429	91070	NA	NA	NA
finn-a-OFFICIAL_TILASTOKESKUS	Alcohol related diseases, tilastokeskus definition	0	NA	Binary	94036	16152119	2020	NA	NA	NA	Males and Females	European	5044	91455	NA	NA	NA
finn-a-AUD_SWEDISH	Alcohol use disorder, Swedish definition	0	NA	Binary	94036	16152119	2020	NA	NA	NA	Males and Females	European	4999	91500	NA	NA	NA
ukb-b-16878	Alcohol usually taken with meals	1	NA	Binary	235645	9851867	2018	MRC-IEU	Ben Elsworth	NA	Males and Females	European	159104	76541	NA	SD	1618: Output from GWAS pipeline using Phesant derived variables from UKBiobank
finn-a-ALCOPANCCHRON	Alcohol-induced chronic pancreatitis	0	NA	Binary	94036	16152119	2020	NA	NA	NA	Males and Females	European	343	96156	NA	NA	NA
finn-a-K11_ALCOLIV	Alcoholic liver disease	0	NA	Binary	94036	16152119	2020	NA	NA	NA	Males and Females	European	539	94685	NA	NA	NA
finn-a-ALCOLIVER	Alcoholic liver disease	0	NA	Binary	94036	16152119	2020	NA	NA	NA	Males and Females	European	539	95960	NA	NA	NA
finn-a-L12_ALLERGICCONTACT	Alergic contact dermatitis	0	NA	Binary	94036	16152119	2020	NA	NA	NA	Males and Females	European	899	88760	NA	NA	NA
finn-a-F5_ALLANXIOUS	All anxiety disorders	0	NA	Binary	94036	16152119	2020	NA	NA	NA	Males and Females	European	4591	88700	NA	NA	NA
finn-a-J10_INFLUENZA	All influenza	0	NA	Binary	94036	16152119	2020	NA	NA	NA	Males and Females	European	1297	85641	NA	NA	NA
finn-a-INFLUENZA	All influenza (not pneumonia)	0	NA	Binary	94036	16152119	2020	NA	NA	NA	Males and Females	European	963	85641	NA	NA	NA
finn-a-J10_PNEUMONIA	All pneumoniae	0	NA	Binary	94036	16152119	2020	NA	NA	NA	Males and Females	European	9980	86519	NA	NA	NA
finn-a-ALLERG_ASTHMA	Allergic asthma	0	NA	Binary	94036	16152119	2020	NA	NA	NA	Males and Females	European	1764	65521	NA	NA	NA
finn-a-ALLERG_ASTHMA_EXMORE	Allergic asthma (mode)	0	NA	Binary	94036	16152119	2020	NA	NA	NA	Males and Females	European	1764	65127	NA	NA	NA
finn-a-H7_ALLERGICCONJUNCTIVITIS	Allergic conjunctivitis	0	NA	Binary	94036	16152119	2020	NA	NA	NA	Males and Females	European	3944	92555	NA	NA	NA
finn-a-D3_ALLERGPURPURA	Allergic purpura	0	NA	Binary	94036	16152119	2020	NA	NA	NA	Males and Females	European	172	95596	NA	NA	NA
finn-a-ALLERG_RHINITIS	Allergic rhinitis	0	NA	Binary	94036	16152119	2020	NA	NA	NA	Males and Females	European	2105	94078	NA	NA	NA
finn-a-L12_URTICA_ALLERG	Allergic urticaria	0	NA	Binary	94036	16152119	2020	NA	NA	NA	Males and Females	European	412	94158	NA	NA	NA
finn-a-M13_ALGONEURO	Alogoneurodystrophy	0	NA	Binary	94036	16152119	2020	NA	NA	NA	Males and Females	European	165	93083	NA	NA	NA
finn-a-G6_ALZHEIMER	Alzheimer disease	0	NA	Binary	94036	16152119	2020	NA	NA	NA	Males and Females	European	1739	67785	NA	NA	NA
finn-a-G6_ALZHEIMER_EXMORE	Alzheimer disease (more excluded)	0	NA	Binary	94036	16152119	2020	NA	NA	NA	Males and Females	European	1739	36873	NA	NA	NA
finn-a-AD	Alzheimer's disease	0	NA	Binary	94036	16152119	2020	NA	NA	NA	Males and Females	European	1788	67736	NA	NA	NA
finn-a-AD_AM	Alzheimer's disease (Atypical or mixed)	0	NA	Binary	94036	16152119	2020	NA	NA	NA	Males and Females	European	342	67785	NA	NA	NA
finn-a-AD_AM_EXMORE	Alzheimer's disease (Atypical or mixed)	0	NA	Binary	94036	16152119	2020	NA	NA	NA	Males and Females	European	342	36873	NA	NA	NA
finn-a-AD_EO	Alzheimer's disease (Early onset)	0	NA	Binary	94036	16152119	2020	NA	NA	NA	Males and Females	European	314	67781	NA	NA	NA
finn-a-AD_LO	Alzheimer's disease (Late onset)	0	NA	Binary	94036	16152119	2020	NA	NA	NA	Males and Females	European	1232	67778	NA	NA	NA
finn-a-AD_EXMORE	Alzheimer's disease (more excluded)	0	NA	Binary	94036	16152119	2020	NA	NA	NA	Males and Females	European	1788	36873	NA	NA	NA
finn-a-AD_EO_EXMORE	Alzheimer<ef><bf><bd>s disease (Early onset)	0	NA	Binary	94036	16152119	2020	NA	NA	NA	Males and Females	European	314	36873	NA	NA	NA
finn-a-AD_LO_EXMORE	Alzheimer<ef><bf><bd>s disease (Late onset)	0	NA	Binary	94036	16152119	2020	NA	NA	NA	Males and Females	European	1232	36873	NA	NA	NA
finn-a-H7_AMBLYANOPSIA	Amblyopia ex anopsia	0	NA	Binary	94036	16152119	2020	NA	NA	NA	Males and Females	European	188	93878	NA	NA	NA
finn-a-N14_AMENORRHEAPRIM	Amenorrhoea	0	NA	Binary	94036	16152119	2020	NA	NA	NA	Males and Females	European	459	31753	NA	NA	NA
finn-a-AMPUTATION	Amputation	0	NA	Binary	94036	16152119	2020	NA	NA	NA	Males and Females	European	404	94318	NA	NA	NA
finn-a-AMPUTATION_TOE	Amputation of toe	0	NA	Binary	94036	16152119	2020	NA	NA	NA	Males and Females	European	252	96095	NA	NA	NA
finn-a-D3_ANAEMIA	Anaemias	0	NA	Binary	94036	16152119	2020	NA	NA	NA	Males and Females	European	4272	32736	NA	NA	NA
ukb-d-41219_2	Anaesthetics administered during delivery: Epidural or caudal anaesthetic	0	NA	Binary	3970	10215586	2018	NA	Neale lab	NA	Males and Females	European	1740	2230	NA	NA	NA
ukb-d-41219_7	Anaesthetics administered during delivery: Other	0	NA	Binary	4094	10619708	2018	NA	Neale lab	NA	Males and Females	European	2202	1892	NA	NA	NA
ukb-d-41219_3	Anaesthetics administered during delivery: Spinal anaesthetic	0	NA	Binary	3780	9673767	2018	NA	Neale lab	NA	Males and Females	European	1254	2526	NA	NA	NA
ukb-d-41220_7	Anaesthetics administered post delivery: Other	0	NA	Binary	1903	9685743	2018	NA	Neale lab	NA	Males and Females	European	1262	641	NA	NA	NA
finn-a-F5_ANAPER	Anankastic personality disorder	0	NA	Binary	94036	16152119	2020	NA	NA	NA	Males and Females	European	213	93720	NA	NA	NA
finn-a-I9_SAHANEUR	Aneurysms, operations, SAH	0	NA	Binary	94036	16152119	2020	NA	NA	NA	Males and Females	European	815	90757	NA	NA	NA
finn-a-I9_ANGINA	Angina pectoris	0	NA	Binary	94036	16152119	2020	NA	NA	NA	Males and Females	European	6382	85760	NA	NA	NA
finn-a-H7_ANISOMETROPIA	Anisometropia and aniseikonia	0	NA	Binary	94036	16152119	2020	NA	NA	NA	Males and Females	European	137	93606	NA	NA	NA
finn-a-M13_ANKYLOSPON	Ankylosing spondylitis	0	NA	Binary	94036	16152119	2020	NA	NA	NA	Males and Females	European	541	74589	NA	NA	NA
finn-a-F5_ANOREX	Anorexia (incl.atypical)	0	NA	Binary	94036	16152119	2020	NA	NA	NA	Males and Females	European	414	94806	NA	NA	NA
finn-a-ANOSMIA	Anosmia	0	NA	Binary	94036	16152119	2020	NA	NA	NA	Males and Females	European	144	32736	NA	NA	NA
ukb-b-8446	Answered sexual history questions	1	NA	Binary	462725	9851867	2018	MRC-IEU	Ben Elsworth	NA	Males and Females	European	38715	424010	NA	SD	2129: Output from GWAS pipeline using Phesant derived variables from UKBiobank
finn-a-PULM_ANXIETY	Anxiety (asthma-related co-morbidities)	0	NA	Binary	94036	16152119	2020	NA	NA	NA	Males and Females	European	4591	81051	NA	NA	NA
finn-a-KRA_PSY_ANXIETY	Anxiety disorders	0	NA	Binary	94036	16152119	2020	NA	NA	NA	Males and Females	European	7954	88545	NA	NA	NA
ukb-d-KRA_PSY_ANXIETY	Anxiety disorders	0	NA	Binary	361194	9440635	2018	NA	Neale lab	NA	Males and Females	European	1092	360102	NA	NA	NA
finn-a-KRA_PSY_DEMENTIA	Any dementia	0	NA	Binary	94036	16152119	2020	NA	NA	NA	Males and Females	European	2737	75268	NA	NA	NA
finn-a-ANY_CANC	Any event in cancer register	0	NA	Binary	94036	16152119	2020	NA	NA	NA	Males and Females	European	9792	86707	NA	NA	NA
finn-a-ANY_HILMO	Any event in hilmo or specialist outpatient	0	NA	Binary	94036	16152119	2020	NA	NA	NA	Males and Females	European	94895	1604	NA	NA	NA
finn-a-ICDMAIN_ANY_ENTRY	Any ICDMAIN event in hilmo or causes of death	0	NA	Binary	94036	16152119	2020	NA	NA	NA	Males and Females	European	94935	1564	NA	NA	NA
ukb-d-ICDMAIN_ANY_ENTRY	Any ICDMAIN event in hilmo or causes of death	0	NA	Binary	361194	13586589	2018	NA	Neale lab	NA	Males and Females	European	282009	79185	NA	NA	NA
finn-a-KRA_PSY_ANYMENTAL	Any mental disorder	0	NA	Binary	94036	16152119	2020	NA	NA	NA	Males and Females	European	21231	75268	NA	NA	NA
ukb-d-KRA_PSY_ANYMENTAL	Any mental disorder	0	NA	Binary	361194	11777016	2018	NA	Neale lab	NA	Males and Females	European	4304	356890	NA	NA	NA
finn-a-KRA_PSY_ANYMENTAL_SUICID	Any mental disorder, or suicide (or attempt)	0	NA	Binary	94036	16152119	2020	NA	NA	NA	Males and Females	European	21231	75268	NA	NA	NA
finn-a-KRA_PSY_ANYMENTAL_SUICID_PREG_NERV	Any mental disorder, or suicide (or attempt), or psychic disorders complicating pregnancy, partum or puerperum or nerve system disorders	0	NA	Binary	94036	16152119	2020	NA	NA	NA	Males and Females	European	21344	75155	NA	NA	NA
finn-a-ANY_OPER	Any operation in hilmo	0	NA	Binary	94036	16152119	2020	NA	NA	NA	Males and Females	European	86626	9873	NA	NA	NA
finn-a-ANY_REIMB	Any reimbursement code in KELA	0	NA	Binary	94036	16152119	2020	NA	NA	NA	Males and Females	European	46166	50333	NA	NA	NA
finn-a-I9_AORTANEUR	Aortic aneurysm	0	NA	Binary	94036	16152119	2020	NA	NA	NA	Males and Females	European	791	92349	NA	NA	NA
finn-a-D3_APLASTICANDOTHANAEMIA	Aplastic and other anaemias	0	NA	Binary	94036	16152119	2020	NA	NA	NA	Males and Females	European	2119	94380	NA	NA	NA
finn-a-I9_ARTEMBTHR	Arterial embolism and thrombosis	0	NA	Binary	94036	16152119	2020	NA	NA	NA	Males and Females	European	278	92349	NA	NA	NA
finn-a-I9_ARTEMBTHRLOW	Arterial embolism and thrombosis of lower extremity artery	0	NA	Binary	94036	16152119	2020	NA	NA	NA	Males and Females	European	164	92349	NA	NA	NA
finn-a-L12_PSORI_ARTHRO	Arthropathic psoriasis	0	NA	Binary	94036	16152119	2020	NA	NA	NA	Males and Females	European	562	93959	NA	NA	NA
finn-a-M13_ARTHROPATHIES	Arthropathies	0	NA	Binary	94036	16152119	2020	NA	NA	NA	Males and Females	European	28811	67688	NA	NA	NA
finn-a-M13_ARTHINOTH	Arthropathies in other diseases classified elsewhere	0	NA	Binary	94036	16152119	2020	NA	NA	NA	Males and Females	European	163	67688	NA	NA	NA
finn-a-AB1_ARTHROPOD	Arthropod-borne viral fevers and viral haemorrhagic fevers	0	NA	Binary	94036	16152119	2020	NA	NA	NA	Males and Females	European	628	95871	NA	NA	NA
finn-a-M13_ARTHROSIS	Arthrosis	0	NA	Binary	94036	16152119	2020	NA	NA	NA	Males and Females	European	14765	67688	NA	NA	NA
finn-a-ARTHROSIS_COMORB	Arthrosis related co-morbidities	0	NA	Binary	94036	16152119	2020	NA	NA	NA	Males and Females	European	3006	53332	NA	NA	NA
finn-a-J10_ASTHMA	Asthma	0	NA	Binary	94036	16152119	2020	NA	NA	NA	Males and Females	European	7982	65521	NA	NA	NA
finn-a-J10_ASTHMA_MAIN	Asthma	0	NA	Binary	94036	16152119	2020	NA	NA	NA	Males and Females	European	6843	65521	NA	NA	NA
ukb-d-J10_ASTHMA	Asthma	0	NA	Binary	361194	10443939	2018	NA	Neale lab	NA	Males and Females	European	1993	359201	NA	NA	NA
finn-a-J10_ASTHMA_EXMORE	Asthma	0	NA	Binary	94036	16152119	2020	NA	NA	NA	Males and Females	European	7982	65127	NA	NA	NA
finn-a-ASTHMA_MODE	Asthma (mode)	0	NA	Binary	94036	16152119	2020	NA	NA	NA	Males and Females	European	7546	65661	NA	NA	NA
finn-a-J10_ASTHMA_MAIN_EXMORE	Asthma (more excluded)	0	NA	Binary	94036	16152119	2020	NA	NA	NA	Males and Females	European	6843	65127	NA	NA	NA
finn-a-ASTHMA_NAS	Asthma (unspecified)	0	NA	Binary	94036	16152119	2020	NA	NA	NA	Males and Females	European	2944	65521	NA	NA	NA
finn-a-ASTHMA_COMORB	Asthma associated co-morbidites	0	NA	Binary	94036	16152119	2020	NA	NA	NA	Males and Females	European	48599	47900	NA	NA	NA
finn-a-ASTHMA_MIXED	Asthma mixed form	0	NA	Binary	94036	16152119	2020	NA	NA	NA	Males and Females	European	221	65521	NA	NA	NA
finn-a-ASTHMA_MIXED_EXMORE	Asthma mixed form (mode)	0	NA	Binary	94036	16152119	2020	NA	NA	NA	Males and Females	European	221	65127	NA	NA	NA
finn-a-ASTHMA_OPPORTUNIST_INFECTIONS	Asthma opportunist infections	0	NA	Binary	94036	16152119	2020	NA	NA	NA	Males and Females	European	176	7806	NA	NA	NA
finn-a-ASTHMA_ACUTE_RESPIRATORY_INFECTIONS	Asthma-related acute respiratory infections	0	NA	Binary	94036	16152119	2020	NA	NA	NA	Males and Females	European	15933	73769	NA	NA	NA
finn-a-ASHMA_INFECTIONS	Asthma-related infections	0	NA	Binary	94036	16152119	2020	NA	NA	NA	Males and Females	European	22730	73769	NA	NA	NA
ukb-d-ASTHMA_PNEUMONIA	Asthma-related pneumonia	0	NA	Binary	361194	12332004	2018	NA	Neale lab	NA	Males and Females	European	5900	355294	NA	NA	NA
finn-a-ASTHMA_PNEUMONIA	Asthma-related pneumonia	0	NA	Binary	94036	16152119	2020	NA	NA	NA	Males and Females	European	10050	73769	NA	NA	NA
finn-a-ASTHMA_PNEUMONIA_AND_SEPSIS	Asthma-related pneumonia or sepsis	0	NA	Binary	94036	16152119	2020	NA	NA	NA	Males and Females	European	10086	86413	NA	NA	NA
finn-a-ASTHMA_HOSPITAL2	Asthma, hospital admission 2	0	NA	Binary	94036	16152119	2020	NA	NA	NA	Males and Females	European	3471	93028	NA	NA	NA
finn-a-ASTHMA_HOSPITAL1	Asthma, hospital admissions 1	0	NA	Binary	94036	16152119	2020	NA	NA	NA	Males and Females	European	6839	89660	NA	NA	NA
ukb-d-ASTHMA_HOSPITAL1	Asthma, hospital admissions 1	0	NA	Binary	361194	10438296	2018	NA	Neale lab	NA	Males and Females	European	1986	359208	NA	NA	NA
finn-a-ASTHMA_HOSPITAL3	Asthma, hospital admissions 3	0	NA	Binary	94036	16152119	2020	NA	NA	NA	Males and Females	European	1841	94658	NA	NA	NA
finn-a-ASTHMA_NAS_EXMORE	Asthma, unspecified (mode)	0	NA	Binary	94036	16152119	2020	NA	NA	NA	Males and Females	European	2944	65127	NA	NA	NA
finn-a-J10_ASTHMACOPDKELA	Asthma/COPD (KELA buy)	0	NA	Binary	94036	16152119	2020	NA	NA	NA	Males and Females	European	8547	83986	NA	NA	NA
finn-a-ACUTE_RESPIRATORY_INFECTIONS	Asthma/COPD-related acute respiratory infections	0	NA	Binary	94036	16152119	2020	NA	NA	NA	Males and Females	European	15933	73769	NA	NA	NA
finn-a-H7_ASTIGMATISM	Astigmatism	0	NA	Binary	94036	16152119	2020	NA	NA	NA	Males and Females	European	189	93606	NA	NA	NA
finn-a-I9_ATHSCLE	Atherosclerosis, excluding cerebral, coronary and PAD	0	NA	Binary	94036	16152119	2020	NA	NA	NA	Males and Females	European	2196	92349	NA	NA	NA
finn-a-H7_CONJUNCTIVITISATOPIC	Atopic conjunctivitis	0	NA	Binary	94036	16152119	2020	NA	NA	NA	Males and Females	European	228	90564	NA	NA	NA
finn-a-L12_ATOPIC	Atopic dermatitis	0	NA	Binary	94036	16152119	2020	NA	NA	NA	Males and Females	European	2663	88760	NA	NA	NA
finn-a-I9_AF	Atrial fibrillation and flutter	0	NA	Binary	94036	16152119	2020	NA	NA	NA	Males and Females	European	7244	56378	NA	NA	NA
ukb-d-L12_ATROPHICSKIN	Atrophic disorders of skin	0	NA	Binary	361194	10231534	2018	NA	Neale lab	NA	Males and Females	European	1757	359437	NA	NA	NA
finn-a-L12_ATROPHICSKIN	Atrophic disorders of skin	0	NA	Binary	94036	16152119	2020	NA	NA	NA	Males and Females	European	566	92525	NA	NA	NA
ukb-b-4323	Attempted fluid intelligence (FI) test.	1	NA	Binary	151059	9851867	2018	MRC-IEU	Ben Elsworth	NA	Males and Females	European	2008	149051	NA	SD	4924: Output from GWAS pipeline using Phesant derived variables from UKBiobank
ukb-b-16671	Attendance/disability/mobility allowance: Attendance allowance	1	NA	Binary	459354	9851867	2018	MRC-IEU	Ben Elsworth	NA	Males and Females	European	3316	456038	NA	SD	6146#1: Output from GWAS pipeline using Phesant derived variables from UKBiobank
ukb-b-1867	Attendance/disability/mobility allowance: Blue badge	1	NA	Binary	459354	9851867	2018	MRC-IEU	Ben Elsworth	NA	Males and Females	European	16449	442905	NA	SD	6146#3: Output from GWAS pipeline using Phesant derived variables from UKBiobank
ukb-b-20214	Attendance/disability/mobility allowance: Disability living allowance	1	NA	Binary	459354	9851867	2018	MRC-IEU	Ben Elsworth	NA	Males and Females	European	20426	438928	NA	SD	6146#2: Output from GWAS pipeline using Phesant derived variables from UKBiobank
ukb-b-3855	Attendance/disability/mobility allowance: None of the above	1	NA	Binary	459354	9851867	2018	MRC-IEU	Ben Elsworth	NA	Males and Females	European	432343	27011	NA	SD	6146#100: Output from GWAS pipeline using Phesant derived variables from UKBiobank
finn-a-G6_ATYFAC	Atypical facial pain	0	NA	Binary	94036	16152119	2020	NA	NA	NA	Males and Females	European	297	86854	NA	NA	NA
finn-a-ILD_SYST_AUTO_DISEASES	Autoimmune diseases related-to ILD	0	NA	Binary	94036	16152119	2020	NA	NA	NA	Males and Females	European	7394	88677	NA	NA	NA
finn-a-I9_AVBLOCK	AV-block	0	NA	Binary	94036	16152119	2020	NA	NA	NA	Males and Females	European	718	75137	NA	NA	NA
ukb-b-8463	Back pain for 3+ months	1	NA	Binary	117404	9851867	2018	MRC-IEU	Ben Elsworth	NA	Males and Females	European	80588	36816	NA	SD	3571: Output from GWAS pipeline using Phesant derived variables from UKBiobank
finn-a-DM_BCKGRND_RETINA	Background diabetic retinopathy	0	NA	Binary	94036	16152119	2020	NA	NA	NA	Males and Females	European	865	90873	NA	NA	NA
finn-a-IBD_BACT_INTEST_INFECTIONS	Bacterial intestinal infections, IBD co-morbidities	0	NA	Binary	94036	16152119	2020	NA	NA	NA	Males and Females	European	950	94999	NA	NA	NA
finn-a-G6_MENINGBACT	Bacterial meningitis	0	NA	Binary	94036	16152119	2020	NA	NA	NA	Males and Females	European	233	96018	NA	NA	NA
finn-a-PNEUMOBACTKNOWN	Bacterial pneumonia (organism specified)	0	NA	Binary	94036	16152119	2020	NA	NA	NA	Males and Females	European	3157	86449	NA	NA	NA
finn-a-J10_PNEUMOBACTEROTH	Bacterial pneumonia, not elsewhere classified	0	NA	Binary	94036	16152119	2020	NA	NA	NA	Males and Females	European	2910	85641	NA	NA	NA
finn-a-J10_PNEUMOBACT	Bacterial pneumoniae	0	NA	Binary	94036	16152119	2020	NA	NA	NA	Males and Females	European	3077	85641	NA	NA	NA
finn-a-AB1_BACT_BIR_OTHER_INF_AGENTS	Bacterial, viral and other infectious agents	0	NA	Binary	94036	16152119	2020	NA	NA	NA	Males and Females	European	580	95919	NA	NA	NA
finn-a-K11_BARRET	Barret oesophagus	0	NA	Binary	94036	16152119	2020	NA	NA	NA	Males and Females	European	142	85160	NA	NA	NA
ukb-d-K11_BARRET	Barret oesophagus	0	NA	Binary	361194	10263030	2018	NA	Neale lab	NA	Males and Females	European	1791	359403	NA	NA	NA
ukb-d-20526	Been in serious accident believed to be life-threatening	0	NA	Binary	117922	13471714	2018	NA	Neale lab	NA	Males and Females	European	11325	106597	NA	NA	NA
ukb-d-20527	Been involved in combat or exposed to war-zone	0	NA	Binary	117954	11654769	2018	NA	Neale lab	NA	Males and Females	European	4010	113944	NA	NA	NA
finn-a-F5_BEHEMOCHILD	Behauvioural and emotional disorders with onset usually occuring in childhood and adolescence	0	NA	Binary	94036	16152119	2020	NA	NA	NA	Males and Females	European	1022	95477	NA	NA	NA
ukb-d-20552_2	Behavioural and miscellaneous addictions: A behaviour	0	NA	Binary	116746	9619069	2018	NA	Neale lab	NA	Males and Females	European	1216	115530	NA	NA	NA
finn-a-KRA_PSY_BEHAV	Behavioural disorders	0	NA	Binary	94036	16152119	2020	NA	NA	NA	Males and Females	European	152	96347	NA	NA	NA
finn-a-F5_BEHAVE	Behavioural syndromes associated with physiological disturbances and physical factors	0	NA	Binary	94036	16152119	2020	NA	NA	NA	Males and Females	European	1693	94806	NA	NA	NA
finn-a-G6_BELLPA	Bell's palsy	0	NA	Binary	94036	16152119	2020	NA	NA	NA	Males and Females	European	658	86854	NA	NA	NA
finn-a-CD2_BENIGN_LIPOMATOUS	Benign lipomatous neoplasm	0	NA	Binary	94036	16152119	2020	NA	NA	NA	Males and Females	European	1947	94552	NA	NA	NA
finn-a-CD2_BENIGN_LIPOMATOUS_EXALLC	Benign lipomatous neoplasm (ICD C excluded)	0	NA	Binary	94036	16152119	2020	NA	NA	NA	Males and Females	European	1947	85419	NA	NA	NA
finn-a-CD2_BENIGN_LIPO_NOS	Benign lipomatous neoplasm of other sites/unspecified	0	NA	Binary	94036	16152119	2020	NA	NA	NA	Males and Females	European	593	95906	NA	NA	NA
finn-a-CD2_BENIGN_LIPO_NOS_EXALLC	Benign lipomatous neoplasm of other sites/unspecified (ICD C excluded)	0	NA	Binary	94036	16152119	2020	NA	NA	NA	Males and Females	European	593	86575	NA	NA	NA
finn-a-CD2_BENIGN_LIPO_SKIN_HEADFACENECK	Benign lipomatous neoplasm of skin and subcutaneous tissue of head, face and neck	0	NA	Binary	94036	16152119	2020	NA	NA	NA	Males and Females	European	382	96117	NA	NA	NA
finn-a-CD2_BENIGN_LIPO_SKIN_HEADFACENECK_EXALLC	Benign lipomatous neoplasm of skin and subcutaneous tissue of head, face and neck (ICD C excluded)	0	NA	Binary	94036	16152119	2020	NA	NA	NA	Males and Females	European	382	86731	NA	NA	NA
finn-a-CD2_BENIGN_LIPO_SKIN_LIMBS	Benign lipomatous neoplasm of skin and subcutaneous tissue of limbs	0	NA	Binary	94036	16152119	2020	NA	NA	NA	Males and Females	European	433	96066	NA	NA	NA
finn-a-CD2_BENIGN_LIPO_SKIN_LIMBS_EXALLC	Benign lipomatous neoplasm of skin and subcutaneous tissue of limbs (ICD C excluded)	0	NA	Binary	94036	16152119	2020	NA	NA	NA	Males and Females	European	433	86695	NA	NA	NA
finn-a-CD2_BENIGN_LIPO_SKIN_TRUNK	Benign lipomatous neoplasm of skin and subcutaneous tissue of trunk	0	NA	Binary	94036	16152119	2020	NA	NA	NA	Males and Females	European	712	95787	NA	NA	NA
finn-a-CD2_BENIGN_LIPO_SKIN_TRUNK_EXALLC	Benign lipomatous neoplasm of skin and subcutaneous tissue of trunk (ICD C excluded)	0	NA	Binary	94036	16152119	2020	NA	NA	NA	Males and Females	European	712	86455	NA	NA	NA
finn-a-N14_BENIGNMAMDYSP	Benign mammary dysplasia	0	NA	Binary	94036	16152119	2020	NA	NA	NA	Males and Females	European	1257	50767	NA	NA	NA
finn-a-CD2_BENIGN_BONE_CARTILAGE	Benign neoplasm of bone and articular cartilage	0	NA	Binary	94036	16152119	2020	NA	NA	NA	Males and Females	European	500	95999	NA	NA	NA
finn-a-CD2_BENIGN_BONE_CARTILAGE_EXALLC	Benign neoplasm of bone and articular cartilage (ICD C excluded)	0	NA	Binary	94036	16152119	2020	NA	NA	NA	Males and Females	European	500	86639	NA	NA	NA
finn-a-CD2_BENIGN_BRAIN_CNS	Benign neoplasm of brain and other parts of central nervous system	0	NA	Binary	94036	16152119	2020	NA	NA	NA	Males and Females	European	337	96162	NA	NA	NA
finn-a-CD2_BENIGN_BRAIN_CNS_EXALLC	Benign neoplasm of brain and other parts of central nervous system (ICD C excluded)	0	NA	Binary	94036	16152119	2020	NA	NA	NA	Males and Females	European	337	86809	NA	NA	NA
finn-a-CD2_BENIGN_BREAST	Benign neoplasm of breast	0	NA	Binary	94036	16152119	2020	NA	NA	NA	Males and Females	European	941	95558	NA	NA	NA
finn-a-CD2_BENIGN_BREAST_EXALLC	Benign neoplasm of breast (ICD C excluded)	0	NA	Binary	94036	16152119	2020	NA	NA	NA	Males and Females	European	941	86350	NA	NA	NA
finn-a-CD2_BENIGN_COLORECANI	Benign neoplasm of colon, rectum, anus and anal canal	0	NA	Binary	94036	16152119	2020	NA	NA	NA	Males and Females	European	3170	93329	NA	NA	NA
finn-a-CD2_BENIGN_COLORECANI_EXALLC	Benign neoplasm of colon, rectum, anus and anal canal (ICD C excluded)	0	NA	Binary	94036	16152119	2020	NA	NA	NA	Males and Females	European	3170	84676	NA	NA	NA
finn-a-CD2_BENIGN_EYE	Benign neoplasm of eye and adnexa	0	NA	Binary	94036	16152119	2020	NA	NA	NA	Males and Females	European	433	96066	NA	NA	NA
finn-a-CD2_BENIGN_EYE_EXALLC	Benign neoplasm of eye and adnexa (ICD C excluded)	0	NA	Binary	94036	16152119	2020	NA	NA	NA	Males and Females	European	433	86702	NA	NA	NA
finn-a-CD2_BENIGN_SALIVARY	Benign neoplasm of major salivary glands	0	NA	Binary	94036	16152119	2020	NA	NA	NA	Males and Females	European	492	96007	NA	NA	NA
finn-a-CD2_BENIGN_SALIVARY_EXALLC	Benign neoplasm of major salivary glands (ICD C excluded)	0	NA	Binary	94036	16152119	2020	NA	NA	NA	Males and Females	European	492	86665	NA	NA	NA
finn-a-CD2_BENIGN_MENINGES	Benign neoplasm of meninges	0	NA	Binary	94036	16152119	2020	NA	NA	NA	Males and Females	European	455	96044	NA	NA	NA
finn-a-CD2_BENIGN_MENINGES_EXALLC	Benign neoplasm of meninges (ICD C excluded)	0	NA	Binary	94036	16152119	2020	NA	NA	NA	Males and Females	European	455	86713	NA	NA	NA
finn-a-CD2_BENIGN_EAR_RESP	Benign neoplasm of middle ear and respiratory system	0	NA	Binary	94036	16152119	2020	NA	NA	NA	Males and Females	European	344	96155	NA	NA	NA
finn-a-CD2_BENIGN_EAR_RESP_EXALLC	Benign neoplasm of middle ear and respiratory system (ICD C excluded)	0	NA	Binary	94036	16152119	2020	NA	NA	NA	Males and Females	European	344	86777	NA	NA	NA
finn-a-CD2_BENIGN_MOUTH_PHARYNX	Benign neoplasm of mouth and pharynx	0	NA	Binary	94036	16152119	2020	NA	NA	NA	Males and Females	European	634	95865	NA	NA	NA
finn-a-CD2_BENIGN_MOUTH_PHARYNX_EXALLC	Benign neoplasm of mouth and pharynx (ICD C excluded)	0	NA	Binary	94036	16152119	2020	NA	NA	NA	Males and Females	European	634	86534	NA	NA	NA
finn-a-CD2_BENIGN_ENDOCRINE_OTH	Benign neoplasm of other and unspecified endocrine glands	0	NA	Binary	94036	16152119	2020	NA	NA	NA	Males and Females	European	440	96059	NA	NA	NA
finn-a-CD2_BENIGN_ENDOCRINE_OTH_EXALLC	Benign neoplasm of other and unspecified endocrine glands (ICD C excluded)	0	NA	Binary	94036	16152119	2020	NA	NA	NA	Males and Females	European	440	86692	NA	NA	NA
finn-a-CD2_BENIGN_FEMALE_GEN_OTH	Benign neoplasm of other and unspecified female genital organs	0	NA	Binary	94036	16152119	2020	NA	NA	NA	Males and Females	European	258	96241	NA	NA	NA
finn-a-CD2_BENIGN_FEMALE_GEN_OTH_EXALLC	Benign neoplasm of other and unspecified female genital organs (ICD C excluded)	0	NA	Binary	94036	16152119	2020	NA	NA	NA	Males and Females	European	258	86842	NA	NA	NA
finn-a-CD2_BENIGN_OTHER_NOS	Benign neoplasm of other and unspecified sites	0	NA	Binary	94036	16152119	2020	NA	NA	NA	Males and Females	European	183	96316	NA	NA	NA
finn-a-CD2_BENIGN_OTHER_NOS_EXALLC	Benign neoplasm of other and unspecified sites (ICD C excluded)	0	NA	Binary	94036	16152119	2020	NA	NA	NA	Males and Females	European	183	86898	NA	NA	NA
finn-a-CD2_BENIGN_OVARY	Benign neoplasm of ovary	0	NA	Binary	94036	16152119	2020	NA	NA	NA	Males and Females	European	1266	52996	NA	NA	NA
finn-a-CD2_BENIGN_OVARY_EXALLC	Benign neoplasm of ovary (ICD C excluded)	0	NA	Binary	94036	16152119	2020	NA	NA	NA	Males and Females	European	1266	85976	NA	NA	NA
finn-a-CD2_BENIGN_THYROID	Benign neoplasm of thyroid gland	0	NA	Binary	94036	16152119	2020	NA	NA	NA	Males and Females	European	181	96318	NA	NA	NA
finn-a-CD2_BENIGN_THYROID_EXALLC	Benign neoplasm of thyroid gland (ICD C excluded)	0	NA	Binary	94036	16152119	2020	NA	NA	NA	Males and Females	European	181	86929	NA	NA	NA
finn-a-CD2_BENIGN_URINARY	Benign neoplasm of urinary organs	0	NA	Binary	94036	16152119	2020	NA	NA	NA	Males and Females	European	201	96298	NA	NA	NA
finn-a-CD2_BENIGN_URINARY_EXALLC	Benign neoplasm of urinary organs (ICD C excluded)	0	NA	Binary	94036	16152119	2020	NA	NA	NA	Males and Females	European	201	86921	NA	NA	NA
finn-a-CD2_BENIGN_ADRENAL	Benign neoplasm: Adrenal gland	0	NA	Binary	94036	16152119	2020	NA	NA	NA	Males and Females	European	205	96294	NA	NA	NA
finn-a-CD2_BENIGN_ADRENAL_EXALLC	Benign neoplasm: Adrenal gland (ICD C excluded)	0	NA	Binary	94036	16152119	2020	NA	NA	NA	Males and Females	European	205	86903	NA	NA	NA
finn-a-CD2_BENIGN_ANUS_ANAL_CANAL	Benign neoplasm: Anus and anal canal	0	NA	Binary	94036	16152119	2020	NA	NA	NA	Males and Females	European	151	96348	NA	NA	NA
finn-a-CD2_BENIGN_ANUS_ANAL_CANAL_EXALLC	Benign neoplasm: Anus and anal canal (ICD C excluded)	0	NA	Binary	94036	16152119	2020	NA	NA	NA	Males and Females	European	151	86941	NA	NA	NA
finn-a-CD2_BENIGN_ASCENDING_COLON	Benign neoplasm: Ascending colon	0	NA	Binary	94036	16152119	2020	NA	NA	NA	Males and Females	European	428	96071	NA	NA	NA
finn-a-CD2_BENIGN_ASCENDING_COLON_EXALLC	Benign neoplasm: Ascending colon (ICD C excluded)	0	NA	Binary	94036	16152119	2020	NA	NA	NA	Males and Females	European	428	86760	NA	NA	NA
finn-a-CD2_BENIGN_CAECUM	Benign neoplasm: Caecum	0	NA	Binary	94036	16152119	2020	NA	NA	NA	Males and Females	European	301	96198	NA	NA	NA
finn-a-CD2_BENIGN_CAECUM_EXALLC	Benign neoplasm: Caecum (ICD C excluded)	0	NA	Binary	94036	16152119	2020	NA	NA	NA	Males and Females	European	301	86845	NA	NA	NA
finn-a-CD2_BENIGN_MENINGES_CEREBRAL	Benign neoplasm: Cerebral meninges	0	NA	Binary	94036	16152119	2020	NA	NA	NA	Males and Females	European	412	96087	NA	NA	NA
finn-a-CD2_BENIGN_MENINGES_CEREBRAL_EXALLC	Benign neoplasm: Cerebral meninges (ICD C excluded)	0	NA	Binary	94036	16152119	2020	NA	NA	NA	Males and Females	European	412	86747	NA	NA	NA
finn-a-CD2_BENIGN_CHOROID	Benign neoplasm: Choroid	0	NA	Binary	94036	16152119	2020	NA	NA	NA	Males and Females	European	183	96316	NA	NA	NA
finn-a-CD2_BENIGN_CHOROID_EXALLC	Benign neoplasm: Choroid (ICD C excluded)	0	NA	Binary	94036	16152119	2020	NA	NA	NA	Males and Females	European	183	86908	NA	NA	NA
finn-a-CD2_BENIGN_COLON	Benign neoplasm: Colon	0	NA	Binary	94036	16152119	2020	NA	NA	NA	Males and Females	European	2549	93950	NA	NA	NA
finn-a-CD2_BENIGN_COLON_EXALLC	Benign neoplasm: Colon (ICD C excluded)	0	NA	Binary	94036	16152119	2020	NA	NA	NA	Males and Females	European	2549	85160	NA	NA	NA
finn-a-CD2_BENIGN_COLON_NOS	Benign neoplasm: Colon, unspecified	0	NA	Binary	94036	16152119	2020	NA	NA	NA	Males and Females	European	1177	95322	NA	NA	NA
finn-a-CD2_BENIGN_COLON_NOS_EXALLC	Benign neoplasm: Colon, unspecified (ICD C excluded)	0	NA	Binary	94036	16152119	2020	NA	NA	NA	Males and Females	European	1177	86171	NA	NA	NA
finn-a-CD2_BENIGN_CONJUNCTIVA	Benign neoplasm: Conjunctiva	0	NA	Binary	94036	16152119	2020	NA	NA	NA	Males and Females	European	161	96338	NA	NA	NA
finn-a-CD2_BENIGN_CONJUNCTIVA_EXALLC	Benign neoplasm: Conjunctiva (ICD C excluded)	0	NA	Binary	94036	16152119	2020	NA	NA	NA	Males and Females	European	161	86924	NA	NA	NA
finn-a-CD2_BENIGN_CONNSOFT_UPPERLIMB	Benign neoplasm: Connective and other soft tissue of upper limb, including shoulder	0	NA	Binary	94036	16152119	2020	NA	NA	NA	Males and Females	European	241	96258	NA	NA	NA
finn-a-CD2_BENIGN_CONNSOFT_UPPERLIMB_EXALLC	Benign neoplasm: Connective and other soft tissue of upper limb, including shoulder (ICD C excluded)	0	NA	Binary	94036	16152119	2020	NA	NA	NA	Males and Females	European	241	86848	NA	NA	NA
finn-a-CD2_BENIGN_CRANIAL_NERVE	Benign neoplasm: Cranial nerves	0	NA	Binary	94036	16152119	2020	NA	NA	NA	Males and Females	European	139	96360	NA	NA	NA
finn-a-CD2_BENIGN_CRANIAL_NERVE_EXALLC	Benign neoplasm: Cranial nerves (ICD C excluded)	0	NA	Binary	94036	16152119	2020	NA	NA	NA	Males and Females	European	139	86950	NA	NA	NA
finn-a-CD2_BENIGN_DESCENDING_COLON	Benign neoplasm: Descending colon	0	NA	Binary	94036	16152119	2020	NA	NA	NA	Males and Females	European	210	96289	NA	NA	NA
finn-a-CD2_BENIGN_DESCENDING_COLON_EXALLC	Benign neoplasm: Descending colon (ICD C excluded)	0	NA	Binary	94036	16152119	2020	NA	NA	NA	Males and Females	European	210	86908	NA	NA	NA
finn-a-CD2_BENIGN_KIDNEY	Benign neoplasm: Kidney	0	NA	Binary	94036	16152119	2020	NA	NA	NA	Males and Females	European	129	96370	NA	NA	NA
finn-a-CD2_BENIGN_KIDNEY_EXALLC	Benign neoplasm: Kidney (ICD C excluded)	0	NA	Binary	94036	16152119	2020	NA	NA	NA	Males and Females	European	129	86966	NA	NA	NA
finn-a-CD2_BENIGN_BONE_LONG_LOWER	Benign neoplasm: Long bones of lower limb	0	NA	Binary	94036	16152119	2020	NA	NA	NA	Males and Females	European	178	96321	NA	NA	NA
finn-a-CD2_BENIGN_BONE_LONG_LOWER_EXALLC	Benign neoplasm: Long bones of lower limb (ICD C excluded)	0	NA	Binary	94036	16152119	2020	NA	NA	NA	Males and Females	European	178	86913	NA	NA	NA
finn-a-CD2_BENIGN_EAR_NASAL_SINUS	Benign neoplasm: Middle ear, nasal cavity and accessory sinuses	0	NA	Binary	94036	16152119	2020	NA	NA	NA	Males and Females	European	160	96339	NA	NA	NA
finn-a-CD2_BENIGN_EAR_NASAL_SINUS_EXALLC	Benign neoplasm: Middle ear, nasal cavity and accessory sinuses (ICD C excluded)	0	NA	Binary	94036	16152119	2020	NA	NA	NA	Males and Females	European	160	86929	NA	NA	NA
finn-a-CD2_BENIGN_MOUTH_NOS	Benign neoplasm: Other and unspecified parts of mouth	0	NA	Binary	94036	16152119	2020	NA	NA	NA	Males and Females	European	198	96301	NA	NA	NA
finn-a-CD2_BENIGN_MOUTH_NOS_EXALLC	Benign neoplasm: Other and unspecified parts of mouth (ICD C excluded)	0	NA	Binary	94036	16152119	2020	NA	NA	NA	Males and Females	European	198	86891	NA	NA	NA
finn-a-CD2_BENIGN_SMALL_INTESTINE_OTH	Benign neoplasm: Other and unspecified parts of small intestine	0	NA	Binary	94036	16152119	2020	NA	NA	NA	Males and Females	European	144	96355	NA	NA	NA
finn-a-CD2_BENIGN_SMALL_INTESTINE_OTH_EXALLC	Benign neoplasm: Other and unspecified parts of small intestine (ICD C excluded)	0	NA	Binary	94036	16152119	2020	NA	NA	NA	Males and Females	European	144	86950	NA	NA	NA
finn-a-CD2_BENIGN_SALIVARY_NOS	Benign neoplasm: other/unspecified salivary gland	0	NA	Binary	94036	16152119	2020	NA	NA	NA	Males and Females	European	170	96329	NA	NA	NA
finn-a-CD2_BENIGN_SALIVARY_NOS_EXALLC	Benign neoplasm: other/unspecified salivary gland (ICD C excluded)	0	NA	Binary	94036	16152119	2020	NA	NA	NA	Males and Females	European	170	86924	NA	NA	NA
finn-a-CD2_BENIGN_PAROTID	Benign neoplasm: Parotid gland	0	NA	Binary	94036	16152119	2020	NA	NA	NA	Males and Females	European	339	96160	NA	NA	NA
finn-a-CD2_BENIGN_PAROTID_EXALLC	Benign neoplasm: Parotid gland (ICD C excluded)	0	NA	Binary	94036	16152119	2020	NA	NA	NA	Males and Females	European	339	86786	NA	NA	NA
finn-a-CD2_BENIGN_PITUITARY_CRANIPHAR	Benign neoplasm: Pituitary gland, craniopharyngeal duct	0	NA	Binary	94036	16152119	2020	NA	NA	NA	Males and Females	European	180	96319	NA	NA	NA
finn-a-CD2_BENIGN_PITUITARY_CRANIPHAR_EXALLC	Benign neoplasm: Pituitary gland, craniopharyngeal duct (ICD C excluded)	0	NA	Binary	94036	16152119	2020	NA	NA	NA	Males and Females	European	180	86899	NA	NA	NA
finn-a-CD2_BENIGN_RECTOSIGMOID_JUNC	Benign neoplasm: Rectosigmoid junction	0	NA	Binary	94036	16152119	2020	NA	NA	NA	Males and Females	European	153	96346	NA	NA	NA
finn-a-CD2_BENIGN_RECTOSIGMOID_JUNC_EXALLC	Benign neoplasm: Rectosigmoid junction (ICD C excluded)	0	NA	Binary	94036	16152119	2020	NA	NA	NA	Males and Females	European	153	86946	NA	NA	NA
finn-a-CD2_BENIGN_RECTUM	Benign neoplasm: Rectum	0	NA	Binary	94036	16152119	2020	NA	NA	NA	Males and Females	European	723	95776	NA	NA	NA
finn-a-CD2_BENIGN_RECTUM_EXALLC	Benign neoplasm: Rectum (ICD C excluded)	0	NA	Binary	94036	16152119	2020	NA	NA	NA	Males and Females	European	723	86518	NA	NA	NA
finn-a-CD2_BENIGN_RECTUM_ANAL	Benign neoplasm: Rectum, anus and anal canal	0	NA	Binary	94036	16152119	2020	NA	NA	NA	Males and Females	European	847	95652	NA	NA	NA
finn-a-CD2_BENIGN_RECTUM_ANAL_EXALLC	Benign neoplasm: Rectum, anus and anal canal (ICD C excluded)	0	NA	Binary	94036	16152119	2020	NA	NA	NA	Males and Females	European	847	86419	NA	NA	NA
finn-a-CD2_BENIGN_SIGMOID_COLON	Benign neoplasm: Sigmoid colon	0	NA	Binary	94036	16152119	2020	NA	NA	NA	Males and Females	European	761	95738	NA	NA	NA
finn-a-CD2_BENIGN_SIGMOID_COLON_EXALLC	Benign neoplasm: Sigmoid colon (ICD C excluded)	0	NA	Binary	94036	16152119	2020	NA	NA	NA	Males and Females	European	761	86505	NA	NA	NA
finn-a-CD2_BENIGN_SKIN_EAR	Benign neoplasm: Skin of ear and external auricular canal	0	NA	Binary	94036	16152119	2020	NA	NA	NA	Males and Females	European	216	96283	NA	NA	NA
finn-a-CD2_BENIGN_SKIN_EAR_EXALLC	Benign neoplasm: Skin of ear and external auricular canal (ICD C excluded)	0	NA	Binary	94036	16152119	2020	NA	NA	NA	Males and Females	European	216	86887	NA	NA	NA
finn-a-CD2_BENIGN_SKIN_EYELID	Benign neoplasm: Skin of eyelid, including canthus	0	NA	Binary	94036	16152119	2020	NA	NA	NA	Males and Females	European	819	95680	NA	NA	NA
finn-a-CD2_BENIGN_SKIN_EYELID_EXALLC	Benign neoplasm: Skin of eyelid, including canthus (ICD C excluded)	0	NA	Binary	94036	16152119	2020	NA	NA	NA	Males and Females	European	819	86358	NA	NA	NA
finn-a-CD2_BENIGN_SKIN_FACE	Benign neoplasm: Skin of other and unspecified parts of face	0	NA	Binary	94036	16152119	2020	NA	NA	NA	Males and Females	European	726	95773	NA	NA	NA
finn-a-CD2_BENIGN_SKIN_FACE_EXALLC	Benign neoplasm: Skin of other and unspecified parts of face (ICD C excluded)	0	NA	Binary	94036	16152119	2020	NA	NA	NA	Males and Females	European	726	86468	NA	NA	NA
finn-a-CD2_BENIGN_SKIN_SCALPNECK	Benign neoplasm: Skin of scalp and neck	0	NA	Binary	94036	16152119	2020	NA	NA	NA	Males and Females	European	136	96363	NA	NA	NA
finn-a-CD2_BENIGN_SKIN_SCALPNECK_EXALLC	Benign neoplasm: Skin of scalp and neck (ICD C excluded)	0	NA	Binary	94036	16152119	2020	NA	NA	NA	Males and Females	European	136	86961	NA	NA	NA
finn-a-CD2_BENIGN_SKIN_TRUNK	Benign neoplasm: Skin of trunk	0	NA	Binary	94036	16152119	2020	NA	NA	NA	Males and Females	European	216	96283	NA	NA	NA
finn-a-CD2_BENIGN_SKIN_TRUNK_EXALLC	Benign neoplasm: Skin of trunk (ICD C excluded)	0	NA	Binary	94036	16152119	2020	NA	NA	NA	Males and Females	European	216	86896	NA	NA	NA
finn-a-CD2_BENIGN_SKIN_NOS	Benign neoplasm: Skin, unspecified	0	NA	Binary	94036	16152119	2020	NA	NA	NA	Males and Females	European	216	96283	NA	NA	NA
finn-a-CD2_BENIGN_SKIN_NOS_EXALLC	Benign neoplasm: Skin, unspecified (ICD C excluded)	0	NA	Binary	94036	16152119	2020	NA	NA	NA	Males and Females	European	216	86873	NA	NA	NA
finn-a-CD2_BENIGN_SMALL_INTESTINE	Benign neoplasm: Small intestine	0	NA	Binary	94036	16152119	2020	NA	NA	NA	Males and Females	European	248	96251	NA	NA	NA
finn-a-CD2_BENIGN_SMALL_INTESTINE_EXALLC	Benign neoplasm: Small intestine (ICD C excluded)	0	NA	Binary	94036	16152119	2020	NA	NA	NA	Males and Females	European	248	86872	NA	NA	NA
finn-a-CD2_BENIGN_STOMACH	Benign neoplasm: Stomach	0	NA	Binary	94036	16152119	2020	NA	NA	NA	Males and Females	European	436	96063	NA	NA	NA
finn-a-CD2_BENIGN_STOMACH_EXALLC	Benign neoplasm: Stomach (ICD C excluded)	0	NA	Binary	94036	16152119	2020	NA	NA	NA	Males and Females	European	436	86719	NA	NA	NA
finn-a-CD2_BENIGN_TRANSVERSE_COLON	Benign neoplasm: Transverse colon	0	NA	Binary	94036	16152119	2020	NA	NA	NA	Males and Females	European	346	96153	NA	NA	NA
finn-a-CD2_BENIGN_TRANSVERSE_COLON_EXALLC	Benign neoplasm: Transverse colon (ICD C excluded)	0	NA	Binary	94036	16152119	2020	NA	NA	NA	Males and Females	European	346	86803	NA	NA	NA
finn-a-CD2_BENIGN	Benign neoplasms	0	NA	Binary	94036	16152119	2020	NA	NA	NA	Males and Females	European	20474	76025	NA	NA	NA
finn-a-CD2_BENIGN_EXALLC	Benign neoplasms (ICD C excluded)	0	NA	Binary	94036	16152119	2020	NA	NA	NA	Males and Females	European	20474	69982	NA	NA	NA
finn-a-H8_BPV	Benign paroxysmal vertigo	0	NA	Binary	94036	16152119	2020	NA	NA	NA	Males and Females	European	1380	92866	NA	NA	NA
finn-a-M13_BICIPITALTEND	Bicipital tendinitis	0	NA	Binary	94036	16152119	2020	NA	NA	NA	Males and Females	European	274	76986	NA	NA	NA
finn-a-BIGUANIDES	Biguanides	0	NA	Binary	94036	16152119	2020	NA	NA	NA	Males and Females	European	9627	85744	NA	NA	NA
ukb-b-17868	Bilateral oophorectomy (both ovaries removed)	1	NA	Binary	247538	9851867	2018	MRC-IEU	Ben Elsworth	NA	Males and Females	European	20120	227418	NA	SD	2834: Output from GWAS pipeline using Phesant derived variables from UKBiobank
finn-a-M13_BIOMECHLESIO	Biomechanical lesions, not elsewhere classified	0	NA	Binary	94036	16152119	2020	NA	NA	NA	Males and Females	European	205	95736	NA	NA	NA
finn-a-F5_BIPO	Bipolar affective disorders	0	NA	Binary	94036	16152119	2020	NA	NA	NA	Males and Females	European	1876	86081	NA	NA	NA
ukb-d-20126_0	Bipolar and major depression status: No Bipolar or Depression	0	NA	Binary	86895	13562962	2018	NA	Neale lab	NA	Males and Females	European	62825	24070	NA	NA	NA
ukb-d-20126_4	Bipolar and major depression status: Probable Recurrent major depression (moderate)	0	NA	Binary	86895	13412316	2018	NA	Neale lab	NA	Males and Females	European	10902	75993	NA	NA	NA
ukb-d-20126_3	Bipolar and major depression status: Probable Recurrent major depression (severe)	0	NA	Binary	86895	12452268	2018	NA	Neale lab	NA	Males and Females	European	6304	80591	NA	NA	NA
ukb-d-20126_5	Bipolar and major depression status: Single Probable major depression episode	0	NA	Binary	86895	12305095	2018	NA	Neale lab	NA	Males and Females	European	5800	81095	NA	NA	NA
finn-a-H7_BLEPHAROCHALASIS	Blepharochalasis	0	NA	Binary	94036	16152119	2020	NA	NA	NA	Males and Females	European	1533	90757	NA	NA	NA
ukb-b-20296	Blood clot, DVT, bronchitis, emphysema, asthma, rhinitis, eczema, allergy diagnosed by doctor: Asthma	1	NA	Binary	462013	9851867	2018	MRC-IEU	Ben Elsworth	NA	Males and Females	European	53257	408756	NA	SD	6152#8: Output from GWAS pipeline using Phesant derived variables from UKBiobank
ukb-b-11411	Blood clot, DVT, bronchitis, emphysema, asthma, rhinitis, eczema, allergy diagnosed by doctor: Blood clot in the leg (DVT)	1	NA	Binary	462013	9851867	2018	MRC-IEU	Ben Elsworth	NA	Males and Females	European	9440	452573	NA	SD	6152#5: Output from GWAS pipeline using Phesant derived variables from UKBiobank
ukb-b-13704	Blood clot, DVT, bronchitis, emphysema, asthma, rhinitis, eczema, allergy diagnosed by doctor: Blood clot in the lung	1	NA	Binary	462013	9851867	2018	MRC-IEU	Ben Elsworth	NA	Males and Females	European	3819	458194	NA	SD	6152#7: Output from GWAS pipeline using Phesant derived variables from UKBiobank
ukb-b-16207	Blood clot, DVT, bronchitis, emphysema, asthma, rhinitis, eczema, allergy diagnosed by doctor: Emphysema/chronic bronchitis	1	NA	Binary	462013	9851867	2018	MRC-IEU	Ben Elsworth	NA	Males and Females	European	7844	454169	NA	SD	6152#6: Output from GWAS pipeline using Phesant derived variables from UKBiobank
ukb-b-17241	Blood clot, DVT, bronchitis, emphysema, asthma, rhinitis, eczema, allergy diagnosed by doctor: Hayfever, allergic rhinitis or eczema	1	NA	Binary	462013	9851867	2018	MRC-IEU	Ben Elsworth	NA	Males and Females	European	106201	355812	NA	SD	6152#9: Output from GWAS pipeline using Phesant derived variables from UKBiobank
ukb-b-18200	Blood clot, DVT, bronchitis, emphysema, asthma, rhinitis, eczema, allergy diagnosed by doctor: None of the above	1	NA	Binary	462013	9851867	2018	MRC-IEU	Ben Elsworth	NA	Males and Females	European	314035	147978	NA	SD	6152#100: Output from GWAS pipeline using Phesant derived variables from UKBiobank
ukb-b-11262	Blood sample #, note contents: Poor venous access/flow	1	NA	Binary	463000	9851867	2018	MRC-IEU	Ben Elsworth	NA	Males and Females	European	6176	456824	NA	SD	20049#433: Output from GWAS pipeline using Phesant derived variables from UKBiobank
ukb-d-5182_1	Both eyes present: Yes	0	NA	Binary	80386	13557699	2018	NA	Neale lab	NA	Males and Females	European	80283	103	NA	NA	NA
finn-a-G6_BRACHPLE	Brachial plexus disorders	0	NA	Binary	94036	16152119	2020	NA	NA	NA	Males and Females	European	484	86854	NA	NA	NA
ukb-b-14977	Bread consumed	1	NA	Binary	64949	9851867	2018	MRC-IEU	Ben Elsworth	NA	Males and Females	European	55531	9418	NA	SD	100940: Output from GWAS pipeline using Phesant derived variables from UKBiobank
ukb-d-1448_2	Bread type: Brown	0	NA	Binary	348424	13586247	2018	NA	Neale lab	NA	Males and Females	European	41518	306906	NA	NA	NA
ukb-d-1448_4	Bread type: Other type of bread	0	NA	Binary	348424	13586247	2018	NA	Neale lab	NA	Males and Females	European	14441	333983	NA	NA	NA
ukb-d-1448_1	Bread type: White	0	NA	Binary	348424	13586247	2018	NA	Neale lab	NA	Males and Females	European	91452	256972	NA	NA	NA
ukb-d-1448_3	Bread type: Wholemeal or wholegrain	0	NA	Binary	348424	13586247	2018	NA	Neale lab	NA	Males and Females	European	201013	147411	NA	NA	NA
ukb-b-10286	Breakfast cereal consumed	1	NA	Binary	64949	9851867	2018	MRC-IEU	Ben Elsworth	NA	Males and Females	European	42565	22384	NA	SD	100760: Output from GWAS pipeline using Phesant derived variables from UKBiobank
ukb-b-13423	Breastfed as a baby	1	NA	Binary	352094	9851867	2018	MRC-IEU	Ben Elsworth	NA	Males and Females	European	251150	100944	NA	SD	1677: Output from GWAS pipeline using Phesant derived variables from UKBiobank
ukb-d-22616_0	Breathing problems during period of job: No	0	NA	Binary	91149	13567102	2018	NA	Neale lab	NA	Males and Females	European	89591	1558	NA	NA	NA
ukb-d-22616_1	Breathing problems during period of job: Yes	0	NA	Binary	91149	12558073	2018	NA	Neale lab	NA	Males and Females	European	6697	84452	NA	NA	NA
ukb-d-22618_0	Breathing problems improved/stopped away from workplace or on holiday: No	0	NA	Binary	91149	11809431	2018	NA	Neale lab	NA	Males and Females	European	4382	86767	NA	NA	NA
ukb-d-22618_1	Breathing problems improved/stopped away from workplace or on holiday: Yes	0	NA	Binary	91149	10958063	2018	NA	Neale lab	NA	Males and Females	European	2688	88461	NA	NA	NA
ukb-d-22619_0	Breathing problems responsible for leaving job: No	0	NA	Binary	91149	12180564	2018	NA	Neale lab	NA	Males and Females	European	5412	85737	NA	NA	NA
ukb-b-12841	Bring up phlegm/sputum/mucus on most days	1	NA	Binary	112583	9851867	2018	MRC-IEU	Ben Elsworth	NA	Males and Females	European	9677	102906	NA	SD	22504: Output from GWAS pipeline using Phesant derived variables from UKBiobank
finn-a-J10_BRONCHIECTASIS	Bronchiectasis	0	NA	Binary	94036	16152119	2020	NA	NA	NA	Males and Females	European	358	83986	NA	NA	NA
finn-a-BRONCHITIS	Bronchitis	0	NA	Binary	94036	16152119	2020	NA	NA	NA	Males and Females	European	10395	86104	NA	NA	NA
ukb-d-BRONCHITIS	Bronchitis	0	NA	Binary	361194	11768596	2018	NA	Neale lab	NA	Males and Females	European	4283	356911	NA	NA	NA
finn-a-J10_BRONCH	Bronchitis, not specified as acute or chronic	0	NA	Binary	94036	16152119	2020	NA	NA	NA	Males and Females	European	692	83986	NA	NA	NA
finn-a-F5_BULIMIA	Bulimia nervosa (incl. atypical)	0	NA	Binary	94036	16152119	2020	NA	NA	NA	Males and Females	European	170	94806	NA	NA	NA
finn-a-L12_BULLOUS	Bullous disorders	0	NA	Binary	94036	16152119	2020	NA	NA	NA	Males and Females	European	267	96232	NA	NA	NA
ukb-b-17814	Caffeine drink within last hour	1	NA	Binary	424873	9851867	2018	MRC-IEU	Ben Elsworth	NA	Males and Females	European	8991	415882	NA	SD	3089: Output from GWAS pipeline using Phesant derived variables from UKBiobank
finn-a-M13_CALCIFICTEND	Calcific tendinitis of shoulder	0	NA	Binary	94036	16152119	2020	NA	NA	NA	Males and Females	European	336	76986	NA	NA	NA
finn-a-N14_CALCUKIDUR	Calculus of kidney and ureter	0	NA	Binary	94036	16152119	2020	NA	NA	NA	Males and Females	European	1921	94447	NA	NA	NA
finn-a-N14_CALCULOWER	Calculus of lower urinary tract	0	NA	Binary	94036	16152119	2020	NA	NA	NA	Males and Females	European	223	94447	NA	NA	NA
finn-a-CAMPYLOENTERITIS	Campylobacter enteritis	0	NA	Binary	94036	16152119	2020	NA	NA	NA	Males and Females	European	134	95549	NA	NA	NA
ukb-b-8837	Cancer code, self-reported: basal cell carcinoma	1	NA	Binary	462933	9851867	2018	MRC-IEU	Ben Elsworth	NA	Males and Females	European	4290	458643	NA	SD	20001#1061: Output from GWAS pipeline using Phesant derived variables from UKBiobank
ukb-b-8193	Cancer code, self-reported: bladder cancer	1	NA	Binary	462933	9851867	2018	MRC-IEU	Ben Elsworth	NA	Males and Females	European	1101	461832	NA	SD	20001#1035: Output from GWAS pipeline using Phesant derived variables from UKBiobank
ukb-b-16890	Cancer code, self-reported: breast cancer	1	NA	Binary	462933	9851867	2018	MRC-IEU	Ben Elsworth	NA	Males and Females	European	10303	452630	NA	SD	20001#1002: Output from GWAS pipeline using Phesant derived variables from UKBiobank
ukb-b-8777	Cancer code, self-reported: cervical cancer	1	NA	Binary	462933	9851867	2018	MRC-IEU	Ben Elsworth	NA	Males and Females	European	1889	461044	NA	SD	20001#1041: Output from GWAS pipeline using Phesant derived variables from UKBiobank
ukb-b-17507	Cancer code, self-reported: cin/pre-cancer cells cervix	1	NA	Binary	462933	9851867	2018	MRC-IEU	Ben Elsworth	NA	Males and Females	European	1604	461329	NA	SD	20001#1072: Output from GWAS pipeline using Phesant derived variables from UKBiobank
ukb-b-20145	Cancer code, self-reported: colon cancer/sigmoid cancer	1	NA	Binary	462933	9851867	2018	MRC-IEU	Ben Elsworth	NA	Males and Females	European	1494	461439	NA	SD	20001#1022: Output from GWAS pipeline using Phesant derived variables from UKBiobank
ukb-b-12915	Cancer code, self-reported: malignant melanoma	1	NA	Binary	462933	9851867	2018	MRC-IEU	Ben Elsworth	NA	Males and Females	European	3598	459335	NA	SD	20001#1059: Output from GWAS pipeline using Phesant derived variables from UKBiobank
ukb-b-13348	Cancer code, self-reported: prostate cancer	1	NA	Binary	462933	9851867	2018	MRC-IEU	Ben Elsworth	NA	Males and Females	European	3269	459664	NA	SD	20001#1044: Output from GWAS pipeline using Phesant derived variables from UKBiobank
ukb-b-12339	Cancer code, self-reported: skin cancer	1	NA	Binary	462933	9851867	2018	MRC-IEU	Ben Elsworth	NA	Males and Females	European	1436	461497	NA	SD	20001#1003: Output from GWAS pipeline using Phesant derived variables from UKBiobank
ukb-b-13545	Cancer code, self-reported: uterine/endometrial cancer	1	NA	Binary	462933	9851867	2018	MRC-IEU	Ben Elsworth	NA	Males and Females	European	1151	461782	NA	SD	20001#1040: Output from GWAS pipeline using Phesant derived variables from UKBiobank
ukb-b-16855	Cancer diagnosed by doctor	1	NA	Binary	461311	9851867	2018	MRC-IEU	Ben Elsworth	NA	Males and Females	European	36167	425144	NA	SD	2453: Output from GWAS pipeline using Phesant derived variables from UKBiobank
ukb-d-C_DIGESTIVE_ORGANS	Cancer of digestive organs	0	NA	Binary	361194	12268164	2018	NA	Neale lab	NA	Males and Females	European	5690	355504	NA	NA	NA
ukb-d-C_FEMALE_GENITAL	Cancer of female genital	0	NA	Binary	361194	10901963	2018	NA	Neale lab	NA	Males and Females	European	2603	358591	NA	NA	NA
ukb-d-C_MALE_GENITAL	Cancer of male genital	0	NA	Binary	361194	12582534	2018	NA	Neale lab	NA	Males and Females	European	6795	354399	NA	NA	NA
ukb-d-C_PRIMARY_LYMPHOID_HEMATOPOIETIC	Cancer of primary lymphoid hematopoietic	0	NA	Binary	361194	11166429	2018	NA	Neale lab	NA	Males and Females	European	3030	358164	NA	NA	NA
ukb-d-C_RESPIRATORY_INTRATHORACIC	Cancer of respiratory intrathoracic	0	NA	Binary	361194	10401769	2018	NA	Neale lab	NA	Males and Females	European	1944	359250	NA	NA	NA
ukb-d-C_SKIN	Cancer of skin	0	NA	Binary	361194	13586589	2018	NA	Neale lab	NA	Males and Females	European	16531	344663	NA	NA	NA
ukb-d-C_URINARY_TRACT	Cancer of urinary tract	0	NA	Binary	361194	10309627	2018	NA	Neale lab	NA	Males and Females	European	1841	359353	NA	NA	NA
finn-a-CD2_INSITU_BREAST	Carcinoma in situ of breast	0	NA	Binary	94036	16152119	2020	NA	NA	NA	Males and Females	European	377	96122	NA	NA	NA
finn-a-CD2_INSITU_BREAST_EXALLC	Carcinoma in situ of breast (ICD C excluded)	0	NA	Binary	94036	16152119	2020	NA	NA	NA	Males and Females	European	377	87024	NA	NA	NA
finn-a-CD2_INSITU_BREAST_INTRADUCTAL	Carcinoma in situ of breast, intraductal	0	NA	Binary	94036	16152119	2020	NA	NA	NA	Males and Females	European	334	53928	NA	NA	NA
finn-a-CD2_INSITU_BREAST_INTRADUCTAL_EXALLC	Carcinoma in situ of breast, intraductal (ICD C excluded)	0	NA	Binary	94036	16152119	2020	NA	NA	NA	Males and Females	European	335	87034	NA	NA	NA
finn-a-CD2_INSITU_SKIN	Carcinoma in situ of skin	0	NA	Binary	94036	16152119	2020	NA	NA	NA	Males and Females	European	342	96157	NA	NA	NA
finn-a-CD2_INSITU_SKIN_EXALLC	Carcinoma in situ of skin (ICD C excluded)	0	NA	Binary	94036	16152119	2020	NA	NA	NA	Males and Females	European	342	86839	NA	NA	NA
finn-a-CD2_INSITU_SKIN_FACE	Carcinoma in situ of skin of other and unspecified parts of face	0	NA	Binary	94036	16152119	2020	NA	NA	NA	Males and Females	European	179	96320	NA	NA	NA
finn-a-CD2_INSITU_SKIN_FACE_EXALLC	Carcinoma in situ of skin of other and unspecified parts of face (ICD C excluded)	0	NA	Binary	94036	16152119	2020	NA	NA	NA	Males and Females	European	179	86949	NA	NA	NA
finn-a-I9_CARDARR	Cardiac arrest	0	NA	Binary	94036	16152119	2020	NA	NA	NA	Males and Females	European	343	56378	NA	NA	NA
finn-a-CARDIAC_ARRHYTM	Cardiac arrhytmias, COPD co-morbidities	0	NA	Binary	94036	16152119	2020	NA	NA	NA	Males and Females	European	11200	66613	NA	NA	NA
ukb-d-CARDIAC_ARRHYTM	Cardiac arrhytmias, COPD co-morbidities	0	NA	Binary	361194	13042359	2018	NA	Neale lab	NA	Males and Females	European	8801	352393	NA	NA	NA
finn-a-I9_CARDMPRI	Cardiomyopathies, Primary/intrinsic	0	NA	Binary	94036	16152119	2020	NA	NA	NA	Males and Females	European	627	75137	NA	NA	NA
finn-a-I9_CARDMYO	Cardiomyopathy	0	NA	Binary	94036	16152119	2020	NA	NA	NA	Males and Females	European	915	75137	NA	NA	NA
finn-a-FG_CARDMYO	Cardiomyopathy (excluding other)	0	NA	Binary	94036	16152119	2020	NA	NA	NA	Males and Females	European	722	76831	NA	NA	NA
finn-a-I9_CARDMYOHYP	Cardiomyopathy, Hypertrophic obstructive	0	NA	Binary	94036	16152119	2020	NA	NA	NA	Males and Females	European	135	75137	NA	NA	NA
finn-a-I9_CARDMYOOTH	Cardiomyopathy, other and unspecified	0	NA	Binary	94036	16152119	2020	NA	NA	NA	Males and Females	European	368	75137	NA	NA	NA
finn-a-I9_CVD	Cardiovascular diseases	0	NA	Binary	94036	16152119	2020	NA	NA	NA	Males and Females	European	42390	54109	NA	NA	NA
finn-a-FG_CVD	Cardiovascular diseases (excluding rheumatic etc)	0	NA	Binary	94036	16152119	2020	NA	NA	NA	Males and Females	European	40121	56378	NA	NA	NA
ukb-b-5855	Carer support indicators: No	1	NA	Binary	54277	9851867	2018	MRC-IEU	Ben Elsworth	NA	Males and Females	European	52130	2147	NA	SD	41214#2: Output from GWAS pipeline using Phesant derived variables from UKBiobank
ukb-b-67	Carer support indicators: Yes	1	NA	Binary	25191	9851867	2018	MRC-IEU	Ben Elsworth	NA	Males and Females	European	8862	16329	NA	SD	41214#1: Output from GWAS pipeline using Phesant derived variables from UKBiobank
ukb-d-G6_CARPTU	Carpal tunnel syndrome	0	NA	Binary	361194	12867910	2018	NA	Neale lab	NA	Males and Females	European	7973	353221	NA	NA	NA
finn-a-G6_CARPTU	Carpal tunnel syndrome	0	NA	Binary	94036	16152119	2020	NA	NA	NA	Males and Females	European	4505	86854	NA	NA	NA
finn-a-L12_CELLULITIS	Cellulitis	0	NA	Binary	94036	16152119	2020	NA	NA	NA	Males and Females	European	1063	92819	NA	NA	NA
ukb-d-1468_2	Cereal type: Biscuit cereal (e.g. Weetabix)	0	NA	Binary	299898	13584943	2018	NA	Neale lab	NA	Males and Females	European	53310	246588	NA	NA	NA
ukb-d-1468_1	Cereal type: Bran cereal (e.g. All Bran, Branflakes)	0	NA	Binary	299898	13584943	2018	NA	Neale lab	NA	Males and Females	European	50609	249289	NA	NA	NA
ukb-d-1468_4	Cereal type: Muesli	0	NA	Binary	299898	13584943	2018	NA	Neale lab	NA	Males and Females	European	61523	238375	NA	NA	NA
ukb-d-1468_3	Cereal type: Oat cereal (e.g. Ready Brek, porridge)	0	NA	Binary	299898	13584943	2018	NA	Neale lab	NA	Males and Females	European	76351	223547	NA	NA	NA
ukb-d-1468_5	Cereal type: Other (e.g. Cornflakes, Frosties)	0	NA	Binary	299898	13584943	2018	NA	Neale lab	NA	Males and Females	European	58105	241793	NA	NA	NA
finn-a-I9_ANEURYSM	Cerebral aneurysm, nonruptured	0	NA	Binary	94036	16152119	2020	NA	NA	NA	Males and Females	European	316	90757	NA	NA	NA
finn-a-G6_CERCYST	Cerebral cysts	0	NA	Binary	94036	16152119	2020	NA	NA	NA	Males and Females	European	243	91612	NA	NA	NA
finn-a-G6_CPETAL	Cerebral palsy and other paralytic syndromes	0	NA	Binary	94036	16152119	2020	NA	NA	NA	Males and Females	European	667	95832	NA	NA	NA
finn-a-I9_CEREBVASC	Cerebrovascular diseases	0	NA	Binary	94036	16152119	2020	NA	NA	NA	Males and Females	European	5742	90757	NA	NA	NA
finn-a-FG_CEREBVASC	Cerebrovascular diseases (FINNGEN)	0	NA	Binary	94036	16152119	2020	NA	NA	NA	Males and Females	European	5243	56378	NA	NA	NA
finn-a-XVI_PERINATAL	Certain conditions originating in the perinatal period	0	NA	Binary	94036	16152119	2020	NA	NA	NA	Males and Females	European	344	96155	NA	NA	NA
finn-a-D3_IMMUNEMECHANISM	Certain disorders involving the immune mechanism	0	NA	Binary	94036	16152119	2020	NA	NA	NA	Males and Females	European	1032	95467	NA	NA	NA
finn-a-AB1_INFECTIONS	Certain infectious and parasitic diseases	0	NA	Binary	94036	16152119	2020	NA	NA	NA	Males and Females	European	16844	79655	NA	NA	NA
ukb-d-I_INFECT_PARASIT	Certain infectious and parasitic diseases	0	NA	Binary	361194	13138916	2018	NA	Neale lab	NA	Males and Females	European	9297	351897	NA	NA	NA
finn-a-I_INFECT_PARASIT	Certain infectious and parasitic diseases	0	NA	Binary	94036	16152119	2020	NA	NA	NA	Males and Females	European	22729	73770	NA	NA	NA
finn-a-M13_CERVICDISC	Cervical disc disorders	0	NA	Binary	94036	16152119	2020	NA	NA	NA	Males and Females	European	3056	74589	NA	NA	NA
ukb-d-M13_CERVICALGIA	Cervicalgia	0	NA	Binary	361194	9374895	2018	NA	Neale lab	NA	Males and Females	European	1049	360145	NA	NA	NA
finn-a-M13_CERVICALGIA	Cervicalgia	0	NA	Binary	94036	16152119	2020	NA	NA	NA	Males and Females	European	1343	74589	NA	NA	NA
finn-a-M13_CERVICOBRACHSDR	Cervicobrachial syndrome	0	NA	Binary	94036	16152119	2020	NA	NA	NA	Males and Females	European	1512	74589	NA	NA	NA
finn-a-M13_CERVICOCRANSDR	Cervicocranial syndrome	0	NA	Binary	94036	16152119	2020	NA	NA	NA	Males and Females	European	624	74589	NA	NA	NA
finn-a-H7_CHALAZION	Chalazion	0	NA	Binary	94036	16152119	2020	NA	NA	NA	Males and Females	European	706	90757	NA	NA	NA
ukb-d-H7_CHALAZION	Chalazion	0	NA	Binary	361194	9873743	2018	NA	Neale lab	NA	Males and Females	European	1418	359776	NA	NA	NA
ukb-b-10054	Cheese consumers	1	NA	Binary	64949	9851867	2018	MRC-IEU	Ben Elsworth	NA	Males and Females	European	29408	35541	NA	SD	102800: Output from GWAS pipeline using Phesant derived variables from UKBiobank
ukb-b-10797	Chest pain due to walking ceases when standing still	1	NA	Binary	26467	9851867	2018	MRC-IEU	Ben Elsworth	NA	Males and Females	European	21415	5052	NA	SD	3616: Output from GWAS pipeline using Phesant derived variables from UKBiobank
ukb-b-10591	Chest pain or discomfort	1	NA	Binary	458012	9851867	2018	MRC-IEU	Ben Elsworth	NA	Males and Females	European	73061	384951	NA	SD	2335: Output from GWAS pipeline using Phesant derived variables from UKBiobank
ukb-b-11578	Chest pain or discomfort walking normally	1	NA	Binary	72395	9851867	2018	MRC-IEU	Ben Elsworth	NA	Males and Females	European	12799	59596	NA	SD	3606: Output from GWAS pipeline using Phesant derived variables from UKBiobank
ukb-b-4106	Chest pain or discomfort when walking uphill or hurrying	1	NA	Binary	57944	9851867	2018	MRC-IEU	Ben Elsworth	NA	Males and Females	European	15422	42522	NA	SD	3751: Output from GWAS pipeline using Phesant derived variables from UKBiobank
finn-a-CHILDHOOD_ALLERGY	Childhood allergy (age < 16)	0	NA	Binary	94036	16152119	2020	NA	NA	NA	Males and Females	European	787	95653	NA	NA	NA
finn-a-ASTHMA_CHILD_EXMORE	Childhood asthma (age<16)	0	NA	Binary	94036	16152119	2020	NA	NA	NA	Males and Females	European	992	65087	NA	NA	NA
ukb-d-ASTHMA_CHILD	Childhood asthma (age<16)	0	NA	Binary	361194	10443939	2018	NA	Neale lab	NA	Males and Females	European	1993	359201	NA	NA	NA
finn-a-ASTHMA_CHILD	Childhood asthma (age<16)	0	NA	Binary	94036	16152119	2020	NA	NA	NA	Males and Females	European	992	65481	NA	NA	NA
finn-a-K11_CHOLECYST	Chlocystitis	0	NA	Binary	94036	16152119	2020	NA	NA	NA	Males and Females	European	775	87135	NA	NA	NA
finn-a-K11_CHOLANGI	Cholangitis (sclerosing)	0	NA	Binary	94036	16152119	2020	NA	NA	NA	Males and Females	European	200	87135	NA	NA	NA
finn-a-K11_CHOLELITH	Cholelithiasis	0	NA	Binary	94036	16152119	2020	NA	NA	NA	Males and Females	European	7737	87135	NA	NA	NA
finn-a-H8_CHOLEASTOMA	Cholesteatoma of middle ear	0	NA	Binary	94036	16152119	2020	NA	NA	NA	Males and Females	European	325	92308	NA	NA	NA
finn-a-M13_CHONDROMALACIA	Chondromalacia	0	NA	Binary	94036	16152119	2020	NA	NA	NA	Males and Females	European	206	95119	NA	NA	NA
finn-a-H7_CHORIORETINFLAM	Chorioretinal inflammation	0	NA	Binary	94036	16152119	2020	NA	NA	NA	Males and Females	European	137	90618	NA	NA	NA
finn-a-CHRONNAS	Chron's disease NAS	0	NA	Binary	94036	16152119	2020	NA	NA	NA	Males and Females	European	288	93624	NA	NA	NA
finn-a-M13_CHRONDROPATHIES	Chrondropathies	0	NA	Binary	94036	16152119	2020	NA	NA	NA	Males and Females	European	993	95119	NA	NA	NA
finn-a-H7_CONJUNCTIVITISCHRON	Chronic conjunctivitis	0	NA	Binary	94036	16152119	2020	NA	NA	NA	Males and Females	European	161	90564	NA	NA	NA
finn-a-J10_CHRONTONSADEN	Chronic diseases of tonsils and adenoids	0	NA	Binary	94036	16152119	2020	NA	NA	NA	Males and Females	European	9769	76330	NA	NA	NA
ukb-d-K11_CHRONGASTR	Chronic gastritis	0	NA	Binary	361194	10262134	2018	NA	Neale lab	NA	Males and Females	European	1790	359404	NA	NA	NA
finn-a-K11_CHRONGASTR	Chronic gastritis	0	NA	Binary	94036	16152119	2020	NA	NA	NA	Males and Females	European	1999	85160	NA	NA	NA
finn-a-K11_CHRONHEP	Chronic hepatitis, not elsewhere classified	0	NA	Binary	94036	16152119	2020	NA	NA	NA	Males and Females	European	162	94685	NA	NA	NA
finn-a-H7_IRIDOCHRONIC	Chronic iridocyclitis	0	NA	Binary	94036	16152119	2020	NA	NA	NA	Males and Females	European	251	92767	NA	NA	NA
finn-a-N14_CHRONKIDNEYDIS	Chronic kidney disease	0	NA	Binary	94036	16152119	2020	NA	NA	NA	Males and Females	European	1023	94913	NA	NA	NA
finn-a-J10_CHRONLARYNGITIS	Chronic laryngitis and laryngotracheitis	0	NA	Binary	94036	16152119	2020	NA	NA	NA	Males and Females	European	692	76330	NA	NA	NA
finn-a-J10_LOWCHRON	Chronic lower respiratory diseases	0	NA	Binary	94036	16152119	2020	NA	NA	NA	Males and Females	European	12513	83986	NA	NA	NA
finn-a-H8_MASTCHRON	Chronic mastoiditis	0	NA	Binary	94036	16152119	2020	NA	NA	NA	Males and Females	European	158	92308	NA	NA	NA
finn-a-N14_CHRONEPHROPATH	Chronic nephritic syndrome	0	NA	Binary	94036	16152119	2020	NA	NA	NA	Males and Females	European	256	94998	NA	NA	NA
finn-a-K11_CHRONPANC	Chronic pancreatitis	0	NA	Binary	94036	16152119	2020	NA	NA	NA	Males and Females	European	545	87135	NA	NA	NA
finn-a-J10_CHRONRHINITIS	Chronic rhinitsi, nasopharyngitis and pharyngitis	0	NA	Binary	94036	16152119	2020	NA	NA	NA	Males and Females	European	1898	76330	NA	NA	NA
finn-a-J10_CHRONSINUSITIS	Chronic sinusitis	0	NA	Binary	94036	16152119	2020	NA	NA	NA	Males and Females	European	3189	76330	NA	NA	NA
finn-a-H8_CHRON_SUPOTITIS	Chronic suppurative otitis media	0	NA	Binary	94036	16152119	2020	NA	NA	NA	Males and Females	European	197	92308	NA	NA	NA
finn-a-N14_CHRONTUBULOINTNEPHRITIS	Chronic tubulo-interstitial nephritis	0	NA	Binary	94036	16152119	2020	NA	NA	NA	Males and Females	European	249	91563	NA	NA	NA
finn-a-L12_CHRONICULCEROFSKIN	Chronic ulcer of skin, not elsewhere classified	0	NA	Binary	94036	16152119	2020	NA	NA	NA	Males and Females	European	265	92525	NA	NA	NA
finn-a-HEPATITIS_CHRONIC_VIRAL	Chronic viral hepatitis	0	NA	Binary	94036	16152119	2020	NA	NA	NA	Males and Females	European	285	96135	NA	NA	NA
ukb-b-1100	Close to major road	1	NA	Binary	456380	9851867	2018	MRC-IEU	Ben Elsworth	NA	Males and Females	European	31833	424547	NA	SD	24014: Output from GWAS pipeline using Phesant derived variables from UKBiobank
finn-a-ASTHMA_CVDMETABOCOMORB	Co-morbidites, CVD and metabolic diseases	0	NA	Binary	94036	16152119	2020	NA	NA	NA	Males and Females	European	27395	47900	NA	NA	NA
finn-a-NEURO_COMORBIDITIES	Co-morbidities of interest (NEURO)	0	NA	Binary	94036	16152119	2020	NA	NA	NA	Males and Females	European	63763	32736	NA	NA	NA
finn-a-D3_COAGDEF_PURPUR_HAEMORRHAGIC	Coagulation defects, purpura and other haemorrhagic conditions	0	NA	Binary	94036	16152119	2020	NA	NA	NA	Males and Females	European	903	95596	NA	NA	NA
finn-a-K11_COELIAC	Coeliac disease	0	NA	Binary	94036	16152119	2020	NA	NA	NA	Males and Females	European	800	93690	NA	NA	NA
ukb-b-9508	Coffee consumed	1	NA	Binary	64949	9851867	2018	MRC-IEU	Ben Elsworth	NA	Males and Females	European	45788	19161	NA	SD	100240: Output from GWAS pipeline using Phesant derived variables from UKBiobank
ukb-d-1508_1	Coffee type: Decaffeinated coffee (any type)	0	NA	Binary	283449	13584120	2018	NA	Neale lab	NA	Males and Females	European	55310	228139	NA	NA	NA
ukb-d-1508_3	Coffee type: Ground coffee (include espresso, filter etc)	0	NA	Binary	283449	13584120	2018	NA	Neale lab	NA	Males and Females	European	64962	218487	NA	NA	NA
ukb-d-1508_2	Coffee type: Instant coffee	0	NA	Binary	283449	13584120	2018	NA	Neale lab	NA	Males and Females	European	158386	125063	NA	NA	NA
ukb-d-1508_4	Coffee type: Other type of coffee	0	NA	Binary	283449	11965520	2018	NA	Neale lab	NA	Males and Females	European	4791	278658	NA	NA	NA
finn-a-COLITCOLLAG	Collagenous colitis	0	NA	Binary	94036	16152119	2020	NA	NA	NA	Males and Females	European	300	93624	NA	NA	NA
finn-a-C3_COLON_ADENO	Colon adenocarcinoma	0	NA	Binary	94036	16152119	2020	NA	NA	NA	Males and Females	European	462	96037	NA	NA	NA
finn-a-C3_COLON_ADENO_EXALLC	Colon adenocarcinoma (ICD C excluded)	0	NA	Binary	94036	16152119	2020	NA	NA	NA	Males and Females	European	462	87061	NA	NA	NA
finn-a-CUSTOM_COLORECTAL_CANCER_EXALLC	Colorectal cancer	0	NA	Binary	94036	16152119	2020	NA	NA	NA	Males and Females	European	843	95656	NA	NA	NA
finn-a-COMB_ORAL_GLUCLOW	Combinations of oral blood glucose lowering drugs	0	NA	Binary	94036	16152119	2020	NA	NA	NA	Males and Females	European	1430	85744	NA	NA	NA
ukb-d-6020_1	Completion status of test: Fully completed	0	NA	Binary	54007	13546753	2018	NA	Neale lab	NA	Males and Females	European	50215	3792	NA	NA	NA
ukb-d-6020_33	Completion status of test: Heart rate reached safety level	0	NA	Binary	54007	11106901	2018	NA	Neale lab	NA	Males and Females	European	2923	51084	NA	NA	NA
finn-a-G6_CONCUS	Concussion	0	NA	Binary	94036	16152119	2020	NA	NA	NA	Males and Females	European	4191	91328	NA	NA	NA
finn-a-F5_CONDUCT	Conduct disorder	0	NA	Binary	94036	16152119	2020	NA	NA	NA	Males and Females	European	152	95477	NA	NA	NA
ukb-d-I9_CONDUCTIO	Conduction disorders	0	NA	Binary	361194	9383754	2018	NA	Neale lab	NA	Males and Females	European	1055	360139	NA	NA	NA
finn-a-I9_CONDUCTIO	Conduction disorders	0	NA	Binary	94036	16152119	2020	NA	NA	NA	Males and Females	European	1410	75137	NA	NA	NA
finn-a-H8_CONSENHEARINGLOSS	Conductive and sensorineural hearing loss	0	NA	Binary	94036	16152119	2020	NA	NA	NA	Males and Females	European	6730	87840	NA	NA	NA
finn-a-H8_HL_CON_NAS	Conductive hearing loss, unspecified	0	NA	Binary	94036	16152119	2020	NA	NA	NA	Males and Females	European	492	87840	NA	NA	NA
finn-a-CONGEN_HEART_ARTER	Congenital malformations of heart and great arteries	0	NA	Binary	94036	16152119	2020	NA	NA	NA	Males and Females	European	580	95919	NA	NA	NA
ukb-d-XVII_MALFORMAT_ABNORMAL	Congenital malformations, deformations and chromosomal abnormalities	0	NA	Binary	361194	10549084	2018	NA	Neale lab	NA	Males and Females	European	2121	359073	NA	NA	NA
finn-a-XVII_MALFORMAT_ABNORMAL	Congenital malformations, deformations and chromosomal abnormalities	0	NA	Binary	94036	16152119	2020	NA	NA	NA	Males and Females	European	4598	91901	NA	NA	NA
finn-a-H7_CONJUNCTDEGDEPOT	conjunctival degenerations and deposits	0	NA	Binary	94036	16152119	2020	NA	NA	NA	Males and Females	European	149	90564	NA	NA	NA
finn-a-H7_CONJUHAEMOR	conjunctival haemorrhage	0	NA	Binary	94036	16152119	2020	NA	NA	NA	Males and Females	European	273	90564	NA	NA	NA
finn-a-H7_CONJUNCTIVITIS	Conjunctivitis	0	NA	Binary	94036	16152119	2020	NA	NA	NA	Males and Females	European	5308	90564	NA	NA	NA
finn-a-H7_CONJUNCTIVITISACUNONATOPIC	Conjunctivitis (acute, non atopic)	0	NA	Binary	94036	16152119	2020	NA	NA	NA	Males and Females	European	1496	90564	NA	NA	NA
ukb-d-20486	Contemplated self-harm in past year	0	NA	Binary	17244	11386518	2018	NA	Neale lab	NA	Males and Females	European	3438	13806	NA	NA	NA
finn-a-CPAP	Continuous positive airway pressure	0	NA	Binary	94036	16152119	2020	NA	NA	NA	Males and Females	European	768	53684	NA	NA	NA
finn-a-H7_CONVERSTRAB	Convergent concomitant strabismus	0	NA	Binary	94036	16152119	2020	NA	NA	NA	Males and Females	European	347	93606	NA	NA	NA
finn-a-J10_COPD	COPD	0	NA	Binary	94036	16152119	2020	NA	NA	NA	Males and Females	European	2372	83986	NA	NA	NA
finn-a-COPD_MODE	COPD (mode)	0	NA	Binary	94036	16152119	2020	NA	NA	NA	Males and Females	European	1832	66218	NA	NA	NA
finn-a-COPD_CVDMETABOCOMORB	COPD Co-morbidites, CVD and metabolic diseases	0	NA	Binary	94036	16152119	2020	NA	NA	NA	Males and Females	European	29327	50303	NA	NA	NA
finn-a-COPD_EXCL	COPD differential diagnosis	0	NA	Binary	94036	16152119	2020	NA	NA	NA	Males and Females	European	30819	65680	NA	NA	NA
ukb-d-COPD_EXCL	COPD differential diagnosis	0	NA	Binary	361194	13586589	2018	NA	Neale lab	NA	Males and Females	European	26710	334484	NA	NA	NA
finn-a-COPD_OPPORTUNIST_INFECTIONS	COPD related to chronic (opportunist) infections	0	NA	Binary	94036	16152119	2020	NA	NA	NA	Males and Females	European	392	96107	NA	NA	NA
finn-a-COPD_MULTIMORB	COPD related to multimorbidity	0	NA	Binary	94036	16152119	2020	NA	NA	NA	Males and Females	European	1590	94909	NA	NA	NA
finn-a-COPD_COMORB	COPD-associated co-morbidities	0	NA	Binary	94036	16152119	2020	NA	NA	NA	Males and Females	European	46196	50303	NA	NA	NA
finn-a-COPD_INSUFFICIENCY	COPD-related respiratory insufficiency	0	NA	Binary	94036	16152119	2020	NA	NA	NA	Males and Females	European	1635	94864	NA	NA	NA
ukb-d-COPD_EARLYANDLATER	COPD, early/later onset	0	NA	Binary	361194	10360720	2018	NA	Neale lab	NA	Males and Females	European	1897	359297	NA	NA	NA
finn-a-COPD_EARLYANDLATER	COPD, early/later onset	0	NA	Binary	94036	16152119	2020	NA	NA	NA	Males and Females	European	2261	67360	NA	NA	NA
finn-a-COPD_EARLYANDLATER_EXMORE	COPD, early/later onset (more excluded)	0	NA	Binary	94036	16152119	2020	NA	NA	NA	Males and Females	European	2261	67360	NA	NA	NA
finn-a-COPD_HOSPITAL2	COPD, hospital admission 2	0	NA	Binary	94036	16152119	2020	NA	NA	NA	Males and Females	European	1286	95213	NA	NA	NA
finn-a-COPD_HOSPITAL	COPD, hospital admissions	0	NA	Binary	94036	16152119	2020	NA	NA	NA	Males and Females	European	2220	94279	NA	NA	NA
finn-a-COPD_HOSPITAL1	COPD, hospital admissions 1	0	NA	Binary	94036	16152119	2020	NA	NA	NA	Males and Females	European	1618	94881	NA	NA	NA
finn-a-COPD_HOSPITAL3	COPD, hospital admissions 3	0	NA	Binary	94036	16152119	2020	NA	NA	NA	Males and Females	European	1036	95463	NA	NA	NA
finn-a-COPD_ASTHMA_INFECTIONS	COPD/asthma related infections	0	NA	Binary	94036	16152119	2020	NA	NA	NA	Males and Females	European	22730	73769	NA	NA	NA
finn-a-COPD_ASTHMA_PNEUMONIA_SEPSIS	COPD/asthma related pneumonia or pneumonia derived septichaemia	0	NA	Binary	94036	16152119	2020	NA	NA	NA	Males and Females	European	10086	73769	NA	NA	NA
finn-a-PULM_INFECTIONS	COPD/asthma/ILD related infections	0	NA	Binary	94036	16152119	2020	NA	NA	NA	Males and Females	European	22730	73769	NA	NA	NA
finn-a-PULM_PNEUMONIA_SEPSIS	COPD/asthma/ILD related pneumonia or pneumonia derived septichaemia	0	NA	Binary	94036	16152119	2020	NA	NA	NA	Males and Females	European	10086	73769	NA	NA	NA
finn-a-H7_CORNULCER	Corneal ulcer	0	NA	Binary	94036	16152119	2020	NA	NA	NA	Males and Females	European	1014	92767	NA	NA	NA
finn-a-L12_CORNSANDCALLOS	Corns and callosities	0	NA	Binary	94036	16152119	2020	NA	NA	NA	Males and Females	European	413	92525	NA	NA	NA
finn-a-I9_ANGIO	Coronary angiopasty	0	NA	Binary	94036	16152119	2020	NA	NA	NA	Males and Females	European	2521	92571	NA	NA	NA
finn-a-I9_CABG	Coronary artery bypass grafting	0	NA	Binary	94036	16152119	2020	NA	NA	NA	Males and Females	European	1817	92571	NA	NA	NA
ukb-d-I9_CORATHER	Coronary atherosclerosis	0	NA	Binary	361194	13586589	2018	NA	Neale lab	NA	Males and Females	European	14334	346860	NA	NA	NA
finn-a-I9_CORATHER	Coronary atherosclerosis	0	NA	Binary	94036	16152119	2020	NA	NA	NA	Males and Females	European	7661	85760	NA	NA	NA
finn-a-I9_REVASC	Coronary revascularization (ANGIO or CABG)	0	NA	Binary	94036	16152119	2020	NA	NA	NA	Males and Females	European	3928	85760	NA	NA	NA
ukb-b-16858	Cough on most days	1	NA	Binary	112583	9851867	2018	MRC-IEU	Ben Elsworth	NA	Males and Females	European	15367	97216	NA	SD	22502: Output from GWAS pipeline using Phesant derived variables from UKBiobank
finn-a-M13_ARTHTROSIS_COX	Coxarthrosis	0	NA	Binary	94036	16152119	2020	NA	NA	NA	Males and Females	European	3862	67688	NA	NA	NA
ukb-d-COX_ARTHROSIS	Coxarthrosis [arthrosis of hip](FG)	0	NA	Binary	361194	13160539	2018	NA	Neale lab	NA	Males and Females	European	9410	351784	NA	NA	NA
finn-a-COX_ARTHROSIS	Coxarthrosis [arthrosis of hip](FG)	0	NA	Binary	94036	16152119	2020	NA	NA	NA	Males and Females	European	3862	79075	NA	NA	NA
finn-a-K11_CROHN	Crohn disease	0	NA	Binary	94036	16152119	2020	NA	NA	NA	Males and Females	European	617	93624	NA	NA	NA
finn-a-CUSTOM_K50_AND_KELA_NOT_K51	Crohn disease (strict definition, all UC cases excluded)	0	NA	Binary	94036	16152119	2020	NA	NA	NA	Males and Females	European	190	93624	NA	NA	NA
finn-a-CHRONLARGE	Crohn's disease of large intestine	0	NA	Binary	94036	16152119	2020	NA	NA	NA	Males and Females	European	216	93624	NA	NA	NA
finn-a-CHRONSMALL	Crohn's disease of small interstine	0	NA	Binary	94036	16152119	2020	NA	NA	NA	Males and Females	European	268	93624	NA	NA	NA
ukb-b-8810	Current employment status: Doing unpaid or voluntary work	1	NA	Binary	461242	9851867	2018	MRC-IEU	Ben Elsworth	NA	Males and Females	European	17094	444148	NA	SD	6142#6: Output from GWAS pipeline using Phesant derived variables from UKBiobank
ukb-b-20437	Current employment status: Full or part-time student	1	NA	Binary	461242	9851867	2018	MRC-IEU	Ben Elsworth	NA	Males and Females	European	3755	457487	NA	SD	6142#7: Output from GWAS pipeline using Phesant derived variables from UKBiobank
ukb-b-6740	Current employment status: In paid employment or self-employed	1	NA	Binary	461242	9851867	2018	MRC-IEU	Ben Elsworth	NA	Males and Females	European	263827	197415	NA	SD	6142#1: Output from GWAS pipeline using Phesant derived variables from UKBiobank
ukb-b-9056	Current employment status: Looking after home and/or family	1	NA	Binary	461242	9851867	2018	MRC-IEU	Ben Elsworth	NA	Males and Females	European	23212	438030	NA	SD	6142#3: Output from GWAS pipeline using Phesant derived variables from UKBiobank
ukb-b-6748	Current employment status: None of the above	1	NA	Binary	461242	9851867	2018	MRC-IEU	Ben Elsworth	NA	Males and Females	European	2324	458918	NA	SD	6142#100: Output from GWAS pipeline using Phesant derived variables from UKBiobank
ukb-b-19852	Current employment status: Retired	1	NA	Binary	461242	9851867	2018	MRC-IEU	Ben Elsworth	NA	Males and Females	European	168096	293146	NA	SD	6142#2: Output from GWAS pipeline using Phesant derived variables from UKBiobank
ukb-b-14080	Current employment status: Unable to work because of sickness or disability	1	NA	Binary	461242	9851867	2018	MRC-IEU	Ben Elsworth	NA	Males and Females	European	17977	443265	NA	SD	6142#4: Output from GWAS pipeline using Phesant derived variables from UKBiobank
ukb-b-12885	Current employment status: Unemployed	1	NA	Binary	461242	9851867	2018	MRC-IEU	Ben Elsworth	NA	Males and Females	European	7709	453533	NA	SD	6142#5: Output from GWAS pipeline using Phesant derived variables from UKBiobank
ukb-b-266	Current eye infection	1	NA	Binary	102466	9851867	2018	MRC-IEU	Ben Elsworth	NA	Males and Females	European	1110	101356	NA	SD	5183: Output from GWAS pipeline using Phesant derived variables from UKBiobank
finn-a-CUSTOM_K51_AND_KELA_NOT_K50	CUSTOM_K51_AND_KELA_NOT_K50	0	NA	Binary	94036	16152119	2020	NA	NA	NA	Males and Females	European	721	93624	NA	NA	NA
finn-a-L12_ABSCESS_CUT	Cutaneous abscess, furuncle and carbuncle	0	NA	Binary	94036	16152119	2020	NA	NA	NA	Males and Females	European	1261	92819	NA	NA	NA
finn-a-N14_BARTHOCYS	Cyst of Bartholin Gland	0	NA	Binary	94036	16152119	2020	NA	NA	NA	Males and Females	European	224	49639	NA	NA	NA
finn-a-N14_CYSTKID	Cyst of kidney	0	NA	Binary	94036	16152119	2020	NA	NA	NA	Males and Females	European	276	95983	NA	NA	NA
finn-a-N14_CYSTITIS	Cystitis	0	NA	Binary	94036	16152119	2020	NA	NA	NA	Males and Females	European	2938	87680	NA	NA	NA
ukb-d-22630_0	Day shifts worked: Shift pattern was worked for some (but not all) of job	0	NA	Binary	25697	10231691	2018	NA	Neale lab	NA	Males and Females	European	1756	23941	NA	NA	NA
ukb-d-22630_1	Day shifts worked: Shift pattern was worked for whole of job	0	NA	Binary	25697	12374889	2018	NA	Neale lab	NA	Males and Females	European	6046	19651	NA	NA	NA
ukb-d-22630_9	Day shifts worked: This type of shift pattern was not worked during job	0	NA	Binary	25697	13531003	2018	NA	Neale lab	NA	Males and Females	European	20690	5007	NA	NA	NA
ukb-d-20079_5	Day-of-week questionnaire completion requested: Friday	0	NA	Binary	51427	13055099	2018	NA	Neale lab	NA	Males and Females	European	8840	42587	NA	NA	NA
ukb-d-20079_1	Day-of-week questionnaire completion requested: Monday	0	NA	Binary	51427	12887940	2018	NA	Neale lab	NA	Males and Females	European	8041	43386	NA	NA	NA
ukb-d-20079_6	Day-of-week questionnaire completion requested: Saturday	0	NA	Binary	51427	13055796	2018	NA	Neale lab	NA	Males and Females	European	8844	42583	NA	NA	NA
ukb-d-20079_4	Day-of-week questionnaire completion requested: Thursday	0	NA	Binary	51427	13025267	2018	NA	Neale lab	NA	Males and Females	European	8689	42738	NA	NA	NA
ukb-d-20079_2	Day-of-week questionnaire completion requested: Tuesday	0	NA	Binary	51427	12940820	2018	NA	Neale lab	NA	Males and Females	European	8286	43141	NA	NA	NA
ukb-d-20079_3	Day-of-week questionnaire completion requested: Wednesday	0	NA	Binary	51427	13007523	2018	NA	Neale lab	NA	Males and Females	European	8603	42824	NA	NA	NA
finn-a-I9_K_CARDIAC	Death due to cardiac causes	0	NA	Binary	94036	16152119	2020	NA	NA	NA	Males and Females	European	3480	93019	NA	NA	NA
ukb-d-I9_K_CARDIAC	Death due to cardiac causes	0	NA	Binary	361194	10071648	2018	NA	Neale lab	NA	Males and Females	European	1597	359597	NA	NA	NA
finn-a-L12_DECUBITANSULCERANDPRESSURE	Decubitus ulcer and pressure area	0	NA	Binary	94036	16152119	2020	NA	NA	NA	Males and Females	European	226	92525	NA	NA	NA
finn-a-M13_DEFORMDORSO	Deforming dorsopathies	0	NA	Binary	94036	16152119	2020	NA	NA	NA	Males and Females	European	1746	74589	NA	NA	NA
finn-a-H7_MACULADEGEN	Degeneration of macula and posterior pole	0	NA	Binary	94036	16152119	2020	NA	NA	NA	Males and Females	European	2215	90618	NA	NA	NA
ukb-d-H7_MACULADEGEN	Degeneration of macula and posterior pole	0	NA	Binary	361194	9317136	2018	NA	Neale lab	NA	Males and Females	European	1013	360181	NA	NA	NA
finn-a-ALCONEURODEGEN	Degeneration of nervous system due to alcohol	0	NA	Binary	94036	16152119	2020	NA	NA	NA	Males and Females	European	134	96365	NA	NA	NA
finn-a-G6_ALCODEGEN	Degeneration of the brain due to alcohol	0	NA	Binary	94036	16152119	2020	NA	NA	NA	Males and Females	European	134	94475	NA	NA	NA
finn-a-MACULA_NAS	Degenerative macular diseases	0	NA	Binary	94036	16152119	2020	NA	NA	NA	Males and Females	European	670	90618	NA	NA	NA
finn-a-F5_DELIRIUM	Delirium, not induced by alcohol and other psychoactive substances	0	NA	Binary	94036	16152119	2020	NA	NA	NA	Males and Females	European	498	93498	NA	NA	NA
ukb-b-7196	Delivery methods: Elective caesarean section	1	NA	Binary	10487	9851867	2018	MRC-IEU	Ben Elsworth	NA	Males and Females	European	1478	9009	NA	SD	41221#7: Output from GWAS pipeline using Phesant derived variables from UKBiobank
ukb-d-41221_8	Delivery methods: Emergency caesarean section	0	NA	Binary	8019	9538969	2018	NA	Neale lab	NA	Males and Females	European	1158	6861	NA	NA	NA
ukb-b-16958	Delivery methods: Spontaneous vertex	1	NA	Binary	10487	9851867	2018	MRC-IEU	Ben Elsworth	NA	Males and Females	European	5893	4594	NA	SD	41221#0: Output from GWAS pipeline using Phesant derived variables from UKBiobank
ukb-b-19294	Delivery methods: Ventouse, vacuum extraction	1	NA	Binary	10487	9851867	2018	MRC-IEU	Ben Elsworth	NA	Males and Females	European	1044	9443	NA	SD	41221#4: Output from GWAS pipeline using Phesant derived variables from UKBiobank
finn-a-F5_DEMENTIA	Dementia	0	NA	Binary	94036	16152119	2020	NA	NA	NA	Males and Females	European	2162	93498	NA	NA	NA
finn-a-F5_ALZHDEMENT	Dementia in Alzheimer disease	0	NA	Binary	94036	16152119	2020	NA	NA	NA	Males and Females	European	1051	94337	NA	NA	NA
finn-a-F5_DEMINOTH	Dementia in other diseases classified elsewhere	0	NA	Binary	94036	16152119	2020	NA	NA	NA	Males and Females	European	252	94337	NA	NA	NA
finn-a-G6_DEMYEL	Demyelenating diseases of the central nervous system	0	NA	Binary	94036	16152119	2020	NA	NA	NA	Males and Females	European	459	96040	NA	NA	NA
finn-a-F5_DEPPER	Dependent personality disorder	0	NA	Binary	94036	16152119	2020	NA	NA	NA	Males and Females	European	188	93720	NA	NA	NA
ukb-d-F5_DEPRESSIO	Depression	0	NA	Binary	361194	9518776	2018	NA	Neale lab	NA	Males and Females	European	1145	360049	NA	NA	NA
finn-a-F5_DEPRESSIO	Depression	0	NA	Binary	94036	16152119	2020	NA	NA	NA	Males and Females	European	8986	86081	NA	NA	NA
finn-a-ANTIDEPRESSANTS	Depression medications	0	NA	Binary	94036	16152119	2020	NA	NA	NA	Males and Females	European	24308	32736	NA	NA	NA
ukb-d-20445	Depression possibly related to childbirth	0	NA	Binary	38007	11982120	2018	NA	Neale lab	NA	Males and Females	European	4834	33173	NA	NA	NA
ukb-d-20447	Depression possibly related to stressful or traumatic event	0	NA	Binary	66334	13560805	2018	NA	Neale lab	NA	Males and Females	European	48490	17844	NA	NA	NA
finn-a-L12_DERMATITISECZEMA	Dermatitis and eczema	0	NA	Binary	94036	16152119	2020	NA	NA	NA	Males and Females	European	7739	88760	NA	NA	NA
finn-a-L12_INTERNALSUBSTANCEDERM	Dermatitis due to substances taken internally	0	NA	Binary	94036	16152119	2020	NA	NA	NA	Males and Females	European	366	88760	NA	NA	NA
finn-a-L12_URTICA_DERTMATOG	Dermatographic urticaria	0	NA	Binary	94036	16152119	2020	NA	NA	NA	Males and Females	European	304	94158	NA	NA	NA
ukb-b-5460	Dessert consumers	1	NA	Binary	64949	9851867	2018	MRC-IEU	Ben Elsworth	NA	Males and Females	European	20907	44042	NA	SD	102130: Output from GWAS pipeline using Phesant derived variables from UKBiobank
ukb-b-4531	Destinations on discharge from hospital (recoded): Temporary place of residence	1	NA	Binary	460794	9851867	2018	MRC-IEU	Ben Elsworth	NA	Males and Females	European	1434	459360	NA	SD	41248#2000: Output from GWAS pipeline using Phesant derived variables from UKBiobank
ukb-b-2399	Destinations on discharge from hospital (recoded): Transfer to other NHS provider: General ward, young physically disabled, A&E	1	NA	Binary	461036	9851867	2018	MRC-IEU	Ben Elsworth	NA	Males and Females	European	6653	454383	NA	SD	41248#5001: Output from GWAS pipeline using Phesant derived variables from UKBiobank
ukb-b-9253	Destinations on discharge from hospital (recoded): Transfer within NHS provider	1	NA	Binary	460758	9851867	2018	MRC-IEU	Ben Elsworth	NA	Males and Females	European	2339	458419	NA	SD	41248#6000: Output from GWAS pipeline using Phesant derived variables from UKBiobank
ukb-b-6267	Destinations on discharge from hospital (recoded): Transfer within NHS provider: Medical specialty	1	NA	Binary	460756	9851867	2018	MRC-IEU	Ben Elsworth	NA	Males and Females	European	2035	458721	NA	SD	41248#6005: Output from GWAS pipeline using Phesant derived variables from UKBiobank
ukb-b-6806	Destinations on discharge from hospital (recoded): Transfer within NHS provider: Surgical specialty	1	NA	Binary	460756	9851867	2018	MRC-IEU	Ben Elsworth	NA	Males and Females	European	1183	459573	NA	SD	41248#6004: Output from GWAS pipeline using Phesant derived variables from UKBiobank
ukb-b-11749	Destinations on discharge from hospital (recoded): Usual Place of residence	1	NA	Binary	462837	9851867	2018	MRC-IEU	Ben Elsworth	NA	Males and Females	European	299164	163673	NA	SD	41248#1000: Output from GWAS pipeline using Phesant derived variables from UKBiobank
ukb-b-10143	Destinations on discharge from hospital (recoded): Usual Place of residence: Living alone	1	NA	Binary	460756	9851867	2018	MRC-IEU	Ben Elsworth	NA	Males and Females	European	2865	457891	NA	SD	41248#1002: Output from GWAS pipeline using Phesant derived variables from UKBiobank
ukb-b-13065	Destinations on discharge from hospital (recoded): Usual Place of residence: Living with relatives	1	NA	Binary	460758	9851867	2018	MRC-IEU	Ben Elsworth	NA	Males and Females	European	12902	447856	NA	SD	41248#1001: Output from GWAS pipeline using Phesant derived variables from UKBiobank
ukb-d-41215_1	Detention categories: Formally detained under Part II, Mental Health Act 1983	0	NA	Binary	361194	10632519	2018	NA	Neale lab	NA	Males and Females	European	2226	358968	NA	NA	NA
ukb-d-41215_0	Detention categories: Informal, not formally detained	0	NA	Binary	361194	13586589	2018	NA	Neale lab	NA	Males and Females	European	28228	332966	NA	NA	NA
finn-a-J10_SEPTDEV	Deviated nasal septum	0	NA	Binary	94036	16152119	2020	NA	NA	NA	Males and Females	European	2638	76330	NA	NA	NA
finn-a-DM_IBD	Diabetes 1 & 2, IBD co-morbidity	0	NA	Binary	94036	16152119	2020	NA	NA	NA	Males and Females	European	13642	32142	NA	NA	NA
ukb-b-10753	Diabetes diagnosed by doctor	1	NA	Binary	461578	9851867	2018	MRC-IEU	Ben Elsworth	NA	Males and Females	European	22340	439238	NA	SD	2443: Output from GWAS pipeline using Phesant derived variables from UKBiobank
finn-a-DIAB_MED	Diabetes medication	0	NA	Binary	94036	16152119	2020	NA	NA	NA	Males and Females	European	12788	83689	NA	NA	NA
finn-a-E4_DIABETES	Diabetes mellitus	0	NA	Binary	94036	16152119	2020	NA	NA	NA	Males and Females	European	13844	82655	NA	NA	NA
finn-a-DM_COMORB	Diabetes-related co-morbidities/complications	0	NA	Binary	94036	16152119	2020	NA	NA	NA	Males and Females	European	21079	75420	NA	NA	NA
finn-a-DM_COMORB_EXMORE	Diabetes-related co-morbidities/complications (more excluded)	0	NA	Binary	94036	16152119	2020	NA	NA	NA	Males and Females	European	21079	69238	NA	NA	NA
finn-a-KELA_DIAB_INSUL	Diabetes, insuline treatment (Kela reimbursement)	0	NA	Binary	94036	16152119	2020	NA	NA	NA	Males and Females	European	11388	85111	NA	NA	NA
finn-a-DM_KIDNEYFAIL	Diabetes, kidney failure	0	NA	Binary	94036	16152119	2020	NA	NA	NA	Males and Females	European	729	95524	NA	NA	NA
finn-a-DM_OPTHALMIC_COMORB	Diabetes, opthalmic co-morbidities	0	NA	Binary	94036	16152119	2020	NA	NA	NA	Males and Females	European	184	10925	NA	NA	NA
finn-a-DM_SEVERAL_COMPLICATIONS	Diabetes, several complications	0	NA	Binary	94036	16152119	2020	NA	NA	NA	Males and Females	European	2507	75420	NA	NA	NA
finn-a-E4_DMICD8	Diabetes, unspecified because of ICD-8	0	NA	Binary	94036	16152119	2020	NA	NA	NA	Males and Females	European	917	95063	NA	NA	NA
finn-a-E4_DMICD8COMA	Diabetes, unspecified because of ICD-8, with coma	0	NA	Binary	94036	16152119	2020	NA	NA	NA	Males and Females	European	817	95582	NA	NA	NA
finn-a-E4_DMICD8NASCOMP	Diabetes, unspecified because of ICD-8, with multiple/unspecified complications	0	NA	Binary	94036	16152119	2020	NA	NA	NA	Males and Females	European	156	95582	NA	NA	NA
finn-a-E4_DMICD8OTHCOMP	Diabetes, unspecified because of ICD-8, with other specified complications	0	NA	Binary	94036	16152119	2020	NA	NA	NA	Males and Females	European	917	95582	NA	NA	NA
finn-a-E4_DMICD8NOCOMP	Diabetes, unspecified because of ICD-8, without complications	0	NA	Binary	94036	16152119	2020	NA	NA	NA	Males and Females	European	817	95582	NA	NA	NA
finn-a-DIABETES_FG	Diabetes, varying definitions	0	NA	Binary	94036	16152119	2020	NA	NA	NA	Males and Females	European	14118	82381	NA	NA	NA
finn-a-G6_DIABETNEUR	Diabethic neuropathy	0	NA	Binary	94036	16152119	2020	NA	NA	NA	Males and Females	European	590	86854	NA	NA	NA
finn-a-H7_RETINOPATHYDIAB_BKG	Diabetic background retinopathy	0	NA	Binary	94036	16152119	2020	NA	NA	NA	Males and Females	European	865	90618	NA	NA	NA
finn-a-DM_HYPOGLYC	Diabetic hypoglycemia	0	NA	Binary	94036	16152119	2020	NA	NA	NA	Males and Females	European	1557	75420	NA	NA	NA
finn-a-DM_KETOACIDOSIS	Diabetic ketoacidosis	0	NA	Binary	94036	16152119	2020	NA	NA	NA	Males and Females	European	2252	75420	NA	NA	NA
finn-a-DM_MACULOPATHY	Diabetic maculopathy	0	NA	Binary	94036	16152119	2020	NA	NA	NA	Males and Females	European	719	93713	NA	NA	NA
finn-a-H7_MACULOPATHYDIAB	Diabetic maculopathy	0	NA	Binary	94036	16152119	2020	NA	NA	NA	Males and Females	European	719	90618	NA	NA	NA
finn-a-DM_NEPHROPATHY	Diabetic nephropathy	0	NA	Binary	94036	16152119	2020	NA	NA	NA	Males and Females	European	975	93523	NA	NA	NA
finn-a-DM_NEPHROPATHY_EXMORE	Diabetic nephropathy	0	NA	Binary	94036	16152119	2020	NA	NA	NA	Males and Females	European	975	82214	NA	NA	NA
finn-a-DM_NEPHORAPATHY_OPER	Diabetic nephropathy with related operations	0	NA	Binary	94036	16152119	2020	NA	NA	NA	Males and Females	European	315	75420	NA	NA	NA
finn-a-DM_NEUROPATHY	Diabetic neuropathy	0	NA	Binary	94036	16152119	2020	NA	NA	NA	Males and Females	European	589	75420	NA	NA	NA
finn-a-DM_RETINOPATHY	Diabetic retinopathy	0	NA	Binary	94036	16152119	2020	NA	NA	NA	Males and Females	European	5626	90126	NA	NA	NA
finn-a-H7_RETINOPATHYDIAB	Diabetic retinopathy	0	NA	Binary	94036	16152119	2020	NA	NA	NA	Males and Females	European	1530	90618	NA	NA	NA
finn-a-DM_RETINOPATHY_EXMORE	Diabetic retinopathy	0	NA	Binary	94036	16152119	2020	NA	NA	NA	Males and Females	European	5626	79948	NA	NA	NA
ukb-d-20528	Diagnosed with life-threatening illness	0	NA	Binary	117617	13571579	2018	NA	Neale lab	NA	Males and Females	European	19291	98326	NA	NA	NA
ukb-d-A41	Diagnoses - main ICD10: A41 Other septicaemia	0	NA	Binary	361194	10043467	2018	NA	Neale lab	NA	Males and Females	European	1096	360098	NA	NA	NA
ukb-b-3683	Diagnoses - main ICD10: B34.9 Viral infection, unspecified	1	NA	Binary	463010	9851867	2018	MRC-IEU	Ben Elsworth	NA	Males and Females	European	1038	461972	NA	SD	41202#B349: Output from GWAS pipeline using Phesant derived variables from UKBiobank
ukb-d-C18	Diagnoses - main ICD10: C18 Malignant neoplasm of colon	0	NA	Binary	361194	10833390	2018	NA	Neale lab	NA	Males and Females	European	2226	358968	NA	NA	NA
ukb-b-19425	Diagnoses - main ICD10: C20 Malignant neoplasm of rectum	1	NA	Binary	463010	9851867	2018	MRC-IEU	Ben Elsworth	NA	Males and Females	European	1085	461925	NA	SD	41202#C20: Output from GWAS pipeline using Phesant derived variables from UKBiobank
ukb-d-C34	Diagnoses - main ICD10: C34 Malignant neoplasm of bronchus and lung	0	NA	Binary	361194	10138608	2018	NA	Neale lab	NA	Males and Females	European	1427	359767	NA	NA	NA
ukb-d-C43	Diagnoses - main ICD10: C43 Malignant melanoma of skin	0	NA	Binary	361194	10235188	2018	NA	Neale lab	NA	Males and Females	European	1672	359522	NA	NA	NA
ukb-b-4141	Diagnoses - main ICD10: C44.3 Skin of other and unspecified parts of face	1	NA	Binary	463010	9851867	2018	MRC-IEU	Ben Elsworth	NA	Males and Females	European	3824	459186	NA	SD	41202#C443: Output from GWAS pipeline using Phesant derived variables from UKBiobank
ukb-b-3145	Diagnoses - main ICD10: C44.5 Skin of trunk	1	NA	Binary	463010	9851867	2018	MRC-IEU	Ben Elsworth	NA	Males and Females	European	1185	461825	NA	SD	41202#C445: Output from GWAS pipeline using Phesant derived variables from UKBiobank
ukb-b-12115	Diagnoses - main ICD10: C50.4 Upper-outer quadrant of breast	1	NA	Binary	463010	9851867	2018	MRC-IEU	Ben Elsworth	NA	Males and Females	European	1445	461565	NA	SD	41202#C504: Output from GWAS pipeline using Phesant derived variables from UKBiobank
ukb-b-2307	Diagnoses - main ICD10: C50.9 Breast, unspecified	1	NA	Binary	463010	9851867	2018	MRC-IEU	Ben Elsworth	NA	Males and Females	European	6277	456733	NA	SD	41202#C509: Output from GWAS pipeline using Phesant derived variables from UKBiobank
ukb-b-2160	Diagnoses - main ICD10: C61 Malignant neoplasm of prostate	1	NA	Binary	463010	9851867	2018	MRC-IEU	Ben Elsworth	NA	Males and Females	European	3436	459574	NA	SD	41202#C61: Output from GWAS pipeline using Phesant derived variables from UKBiobank
ukb-d-C67	Diagnoses - main ICD10: C67 Malignant neoplasm of bladder	0	NA	Binary	361194	10267743	2018	NA	Neale lab	NA	Males and Females	European	1554	359640	NA	NA	NA
ukb-b-5421	Diagnoses - main ICD10: C67.9 Bladder, unspecified	1	NA	Binary	463010	9851867	2018	MRC-IEU	Ben Elsworth	NA	Males and Females	European	1380	461630	NA	SD	41202#C679: Output from GWAS pipeline using Phesant derived variables from UKBiobank
ukb-d-C78	Diagnoses - main ICD10: C78 Secondary malignant neoplasm of respiratory and digestive organs	0	NA	Binary	361194	10080950	2018	NA	Neale lab	NA	Males and Females	European	1378	359816	NA	NA	NA
ukb-d-C79	Diagnoses - main ICD10: C79 Secondary malignant neoplasm of other sites	0	NA	Binary	361194	9696317	2018	NA	Neale lab	NA	Males and Females	European	1099	360095	NA	NA	NA
ukb-d-D05	Diagnoses - main ICD10: D05 Carcinoma in situ of breast	0	NA	Binary	361194	9970382	2018	NA	Neale lab	NA	Males and Females	European	1454	359740	NA	NA	NA
ukb-d-D12	Diagnoses - main ICD10: D12 Benign neoplasm of colon, rectum, anus and anal canal	0	NA	Binary	361194	13217521	2018	NA	Neale lab	NA	Males and Females	European	8877	352317	NA	NA	NA
ukb-b-10623	Diagnoses - main ICD10: D12.5 Sigmoid colon	1	NA	Binary	463010	9851867	2018	MRC-IEU	Ben Elsworth	NA	Males and Females	European	2447	460563	NA	SD	41202#D125: Output from GWAS pipeline using Phesant derived variables from UKBiobank
ukb-b-19266	Diagnoses - main ICD10: D12.6 Colon, unspecified	1	NA	Binary	463010	9851867	2018	MRC-IEU	Ben Elsworth	NA	Males and Females	European	1870	461140	NA	SD	41202#D126: Output from GWAS pipeline using Phesant derived variables from UKBiobank
ukb-b-9321	Diagnoses - main ICD10: D12.8 Rectum	1	NA	Binary	463010	9851867	2018	MRC-IEU	Ben Elsworth	NA	Males and Females	European	1509	461501	NA	SD	41202#D128: Output from GWAS pipeline using Phesant derived variables from UKBiobank
ukb-d-D17	Diagnoses - main ICD10: D17 Benign lipomatous neoplasm	0	NA	Binary	361194	11857594	2018	NA	Neale lab	NA	Males and Females	European	4314	356880	NA	NA	NA
ukb-b-2561	Diagnoses - main ICD10: D17.1 Benign lipomatous neoplasm of skin and subcutaneous tissue of trunk	1	NA	Binary	463010	9851867	2018	MRC-IEU	Ben Elsworth	NA	Males and Females	European	2006	461004	NA	SD	41202#D171: Output from GWAS pipeline using Phesant derived variables from UKBiobank
ukb-b-212	Diagnoses - main ICD10: D17.2 Benign lipomatous neoplasm of skin and subcutaneous tissue of limbs	1	NA	Binary	463010	9851867	2018	MRC-IEU	Ben Elsworth	NA	Males and Females	European	1514	461496	NA	SD	41202#D172: Output from GWAS pipeline using Phesant derived variables from UKBiobank
ukb-d-D22	Diagnoses - main ICD10: D22 Melanocytic naevi	0	NA	Binary	361194	11466746	2018	NA	Neale lab	NA	Males and Females	European	3501	357693	NA	NA	NA
ukb-b-3596	Diagnoses - main ICD10: D22.3 Melanocytic naevi of other and unspecified parts of face	1	NA	Binary	463010	9851867	2018	MRC-IEU	Ben Elsworth	NA	Males and Females	European	1472	461538	NA	SD	41202#D223: Output from GWAS pipeline using Phesant derived variables from UKBiobank
ukb-d-D23	Diagnoses - main ICD10: D23 Other benign neoplasms of skin	0	NA	Binary	361194	11266715	2018	NA	Neale lab	NA	Males and Females	European	3085	358109	NA	NA	NA
ukb-b-8549	Diagnoses - main ICD10: D24 Benign neoplasm of breast	1	NA	Binary	463010	9851867	2018	MRC-IEU	Ben Elsworth	NA	Males and Females	European	1244	461766	NA	SD	41202#D24: Output from GWAS pipeline using Phesant derived variables from UKBiobank
ukb-b-9536	Diagnoses - main ICD10: D25.9 Leiomyoma of uterus, unspecified	1	NA	Binary	463010	9851867	2018	MRC-IEU	Ben Elsworth	NA	Males and Females	European	5393	457617	NA	SD	41202#D259: Output from GWAS pipeline using Phesant derived variables from UKBiobank
ukb-d-D50	Diagnoses - main ICD10: D50 Iron deficiency anaemia	0	NA	Binary	361194	11553874	2018	NA	Neale lab	NA	Males and Females	European	3222	357972	NA	NA	NA
ukb-b-3355	Diagnoses - main ICD10: D50.9 Iron deficiency anaemia, unspecified	1	NA	Binary	463010	9851867	2018	MRC-IEU	Ben Elsworth	NA	Males and Females	European	2066	460944	NA	SD	41202#D509: Output from GWAS pipeline using Phesant derived variables from UKBiobank
ukb-d-D64	Diagnoses - main ICD10: D64 Other anaemias	0	NA	Binary	361194	11772982	2018	NA	Neale lab	NA	Males and Females	European	3702	357492	NA	NA	NA
ukb-b-14765	Diagnoses - main ICD10: D64.9 Anaemia, unspecified	1	NA	Binary	463010	9851867	2018	MRC-IEU	Ben Elsworth	NA	Males and Females	European	3709	459301	NA	SD	41202#D649: Output from GWAS pipeline using Phesant derived variables from UKBiobank
ukb-d-G43	Diagnoses - main ICD10: G43 Migraine	0	NA	Binary	361194	9633338	2018	NA	Neale lab	NA	Males and Females	European	1072	360122	NA	NA	NA
ukb-b-13190	Diagnoses - main ICD10: G43.9 Migraine, unspecified	1	NA	Binary	463010	9851867	2018	MRC-IEU	Ben Elsworth	NA	Males and Females	European	1001	462009	NA	SD	41202#G439: Output from GWAS pipeline using Phesant derived variables from UKBiobank
ukb-d-G45	Diagnoses - main ICD10: G45 Transient cerebral ischaemic attacks and related syndromes	0	NA	Binary	361194	10414263	2018	NA	Neale lab	NA	Males and Females	European	1744	359450	NA	NA	NA
ukb-b-13391	Diagnoses - main ICD10: G45.9 Transient cerebral ischaemic attack, unspecified	1	NA	Binary	463010	9851867	2018	MRC-IEU	Ben Elsworth	NA	Males and Females	European	1364	461646	NA	SD	41202#G459: Output from GWAS pipeline using Phesant derived variables from UKBiobank
ukb-b-16781	Diagnoses - main ICD10: G47.3 Sleep apnoea	1	NA	Binary	463010	9851867	2018	MRC-IEU	Ben Elsworth	NA	Males and Females	European	2320	460690	NA	SD	41202#G473: Output from GWAS pipeline using Phesant derived variables from UKBiobank
ukb-b-3965	Diagnoses - main ICD10: G56.0 Carpal tunnel syndrome	1	NA	Binary	463010	9851867	2018	MRC-IEU	Ben Elsworth	NA	Males and Females	European	8289	454721	NA	SD	41202#G560: Output from GWAS pipeline using Phesant derived variables from UKBiobank
ukb-d-G57	Diagnoses - main ICD10: G57 Mononeuropathies of lower limb	0	NA	Binary	361194	9584367	2018	NA	Neale lab	NA	Males and Females	European	1111	360083	NA	NA	NA
ukb-d-H00	Diagnoses - main ICD10: H00 Hordeolum and chalazion	0	NA	Binary	361194	9969307	2018	NA	Neale lab	NA	Males and Females	European	1467	359727	NA	NA	NA
ukb-b-4637	Diagnoses - main ICD10: H00.1 Chalazion	1	NA	Binary	463010	9851867	2018	MRC-IEU	Ben Elsworth	NA	Males and Females	European	1551	461459	NA	SD	41202#H001: Output from GWAS pipeline using Phesant derived variables from UKBiobank
ukb-d-H02	Diagnoses - main ICD10: H02 Other disorders of eyelid	0	NA	Binary	361194	11865629	2018	NA	Neale lab	NA	Males and Females	European	4294	356900	NA	NA	NA
ukb-b-9565	Diagnoses - main ICD10: H02.8 Other specified disorders of eyelid	1	NA	Binary	463010	9851867	2018	MRC-IEU	Ben Elsworth	NA	Males and Females	European	1739	461271	NA	SD	41202#H028: Output from GWAS pipeline using Phesant derived variables from UKBiobank
ukb-d-H04	Diagnoses - main ICD10: H04 Disorders of lachrymal system	0	NA	Binary	361194	10027398	2018	NA	Neale lab	NA	Males and Females	European	1476	359718	NA	NA	NA
ukb-b-2285	Diagnoses - main ICD10: H25.0 Senile incipient cataract	1	NA	Binary	463010	9851867	2018	MRC-IEU	Ben Elsworth	NA	Males and Females	European	1061	461949	NA	SD	41202#H250: Output from GWAS pipeline using Phesant derived variables from UKBiobank
ukb-b-3095	Diagnoses - main ICD10: H25.1 Senile nuclear cataract	1	NA	Binary	463010	9851867	2018	MRC-IEU	Ben Elsworth	NA	Males and Females	European	1960	461050	NA	SD	41202#H251: Output from GWAS pipeline using Phesant derived variables from UKBiobank
ukb-b-12397	Diagnoses - main ICD10: H26.9 Cataract, unspecified	1	NA	Binary	463010	9851867	2018	MRC-IEU	Ben Elsworth	NA	Males and Females	European	8890	454120	NA	SD	41202#H269: Output from GWAS pipeline using Phesant derived variables from UKBiobank
ukb-d-H33	Diagnoses - main ICD10: H33 Retinal detachments and breaks	0	NA	Binary	361194	10983089	2018	NA	Neale lab	NA	Males and Females	European	2671	358523	NA	NA	NA
ukb-d-H35	Diagnoses - main ICD10: H35 Other retinal disorders	0	NA	Binary	361194	10098289	2018	NA	Neale lab	NA	Males and Females	European	1551	359643	NA	NA	NA
ukb-d-H40	Diagnoses - main ICD10: H40 Glaucoma	0	NA	Binary	361194	10233350	2018	NA	Neale lab	NA	Males and Females	European	1715	359479	NA	NA	NA
ukb-b-12047	Diagnoses - main ICD10: I20.0 Unstable angina	1	NA	Binary	463010	9851867	2018	MRC-IEU	Ben Elsworth	NA	Males and Females	European	3700	459310	NA	SD	41202#I200: Output from GWAS pipeline using Phesant derived variables from UKBiobank
ukb-b-14206	Diagnoses - main ICD10: I20.9 Angina pectoris, unspecified	1	NA	Binary	463010	9851867	2018	MRC-IEU	Ben Elsworth	NA	Males and Females	European	4256	458754	NA	SD	41202#I209: Output from GWAS pipeline using Phesant derived variables from UKBiobank
ukb-b-453	Diagnoses - main ICD10: I21.0 Acute transmural myocardial infarction of anterior wall	1	NA	Binary	463010	9851867	2018	MRC-IEU	Ben Elsworth	NA	Males and Females	European	1294	461716	NA	SD	41202#I210: Output from GWAS pipeline using Phesant derived variables from UKBiobank
ukb-b-5126	Diagnoses - main ICD10: I21.1 Acute transmural myocardial infarction of inferior wall	1	NA	Binary	463010	9851867	2018	MRC-IEU	Ben Elsworth	NA	Males and Females	European	1673	461337	NA	SD	41202#I211: Output from GWAS pipeline using Phesant derived variables from UKBiobank
ukb-b-3469	Diagnoses - main ICD10: I21.9 Acute myocardial infarction, unspecified	1	NA	Binary	463010	9851867	2018	MRC-IEU	Ben Elsworth	NA	Males and Females	European	2321	460689	NA	SD	41202#I219: Output from GWAS pipeline using Phesant derived variables from UKBiobank
ukb-b-1668	Diagnoses - main ICD10: I25.1 Atherosclerotic heart disease	1	NA	Binary	463010	9851867	2018	MRC-IEU	Ben Elsworth	NA	Males and Females	European	12171	450839	NA	SD	41202#I251: Output from GWAS pipeline using Phesant derived variables from UKBiobank
ukb-b-3983	Diagnoses - main ICD10: I25.9 Chronic ischaemic heart disease, unspecified	1	NA	Binary	463010	9851867	2018	MRC-IEU	Ben Elsworth	NA	Males and Females	European	1195	461815	NA	SD	41202#I259: Output from GWAS pipeline using Phesant derived variables from UKBiobank
ukb-d-I26	Diagnoses - main ICD10: I26 Pulmonary embolism	0	NA	Binary	361194	10721750	2018	NA	Neale lab	NA	Males and Females	European	2118	359076	NA	NA	NA
ukb-b-18366	Diagnoses - main ICD10: I26.9 Pulmonary embolism without mention of acute cor pulmonale	1	NA	Binary	463010	9851867	2018	MRC-IEU	Ben Elsworth	NA	Males and Females	European	1846	461164	NA	SD	41202#I269: Output from GWAS pipeline using Phesant derived variables from UKBiobank
ukb-d-I47	Diagnoses - main ICD10: I47 Paroxysmal tachycardia	0	NA	Binary	361194	10299263	2018	NA	Neale lab	NA	Males and Females	European	1685	359509	NA	NA	NA
ukb-b-11748	Diagnoses - main ICD10: I47.1 Supraventricular tachycardia	1	NA	Binary	463010	9851867	2018	MRC-IEU	Ben Elsworth	NA	Males and Females	European	1306	461704	NA	SD	41202#I471: Output from GWAS pipeline using Phesant derived variables from UKBiobank
ukb-b-964	Diagnoses - main ICD10: I48 Atrial fibrillation and flutter	1	NA	Binary	463010	9851867	2018	MRC-IEU	Ben Elsworth	NA	Males and Females	European	5669	457341	NA	SD	41202#I48: Output from GWAS pipeline using Phesant derived variables from UKBiobank
ukb-d-I50	Diagnoses - main ICD10: I50 Heart failure	0	NA	Binary	361194	9806537	2018	NA	Neale lab	NA	Males and Females	European	1088	360106	NA	NA	NA
ukb-d-I63	Diagnoses - main ICD10: I63 Cerebral infarction	0	NA	Binary	361194	10889323	2018	NA	Neale lab	NA	Males and Females	European	2353	358841	NA	NA	NA
ukb-b-19350	Diagnoses - main ICD10: I63.9 Cerebral infarction, unspecified	1	NA	Binary	463010	9851867	2018	MRC-IEU	Ben Elsworth	NA	Males and Females	European	1420	461590	NA	SD	41202#I639: Output from GWAS pipeline using Phesant derived variables from UKBiobank
ukb-b-12267	Diagnoses - main ICD10: I80.2 Phlebitis and thrombophlebitis of other deep vessels of lower extremities	1	NA	Binary	463010	9851867	2018	MRC-IEU	Ben Elsworth	NA	Males and Females	European	1832	461178	NA	SD	41202#I802: Output from GWAS pipeline using Phesant derived variables from UKBiobank
ukb-b-6720	Diagnoses - main ICD10: I83.9 Varicose veins of lower extremities without ulcer or inflammation	1	NA	Binary	463010	9851867	2018	MRC-IEU	Ben Elsworth	NA	Males and Females	European	10044	452966	NA	SD	41202#I839: Output from GWAS pipeline using Phesant derived variables from UKBiobank
ukb-b-14416	Diagnoses - main ICD10: I84.1 Internal haemorrhoids with other complications	1	NA	Binary	463010	9851867	2018	MRC-IEU	Ben Elsworth	NA	Males and Females	European	1549	461461	NA	SD	41202#I841: Output from GWAS pipeline using Phesant derived variables from UKBiobank
ukb-b-17992	Diagnoses - main ICD10: I84.2 Internal haemorrhoids without complication	1	NA	Binary	463010	9851867	2018	MRC-IEU	Ben Elsworth	NA	Males and Females	European	1461	461549	NA	SD	41202#I842: Output from GWAS pipeline using Phesant derived variables from UKBiobank
ukb-b-16882	Diagnoses - main ICD10: I84.6 Residual haemorrhoidal skin tags	1	NA	Binary	463010	9851867	2018	MRC-IEU	Ben Elsworth	NA	Males and Females	European	1309	461701	NA	SD	41202#I846: Output from GWAS pipeline using Phesant derived variables from UKBiobank
ukb-b-7444	Diagnoses - main ICD10: I84.8 Unspecified haemorrhoids with other complications	1	NA	Binary	463010	9851867	2018	MRC-IEU	Ben Elsworth	NA	Males and Females	European	2321	460689	NA	SD	41202#I848: Output from GWAS pipeline using Phesant derived variables from UKBiobank
ukb-b-11261	Diagnoses - main ICD10: I84.9 Unspecified haemorrhoids without complication	1	NA	Binary	463010	9851867	2018	MRC-IEU	Ben Elsworth	NA	Males and Females	European	6198	456812	NA	SD	41202#I849: Output from GWAS pipeline using Phesant derived variables from UKBiobank
ukb-d-J18	Diagnoses - main ICD10: J18 Pneumonia, organism unspecified	0	NA	Binary	361194	12165649	2018	NA	Neale lab	NA	Males and Females	European	4630	356564	NA	NA	NA
ukb-b-6576	Diagnoses - main ICD10: J18.1 Lobar pneumonia, unspecified	1	NA	Binary	463010	9851867	2018	MRC-IEU	Ben Elsworth	NA	Males and Females	European	2359	460651	NA	SD	41202#J181: Output from GWAS pipeline using Phesant derived variables from UKBiobank
ukb-b-15606	Diagnoses - main ICD10: J18.9 Pneumonia, unspecified	1	NA	Binary	463010	9851867	2018	MRC-IEU	Ben Elsworth	NA	Males and Females	European	1611	461399	NA	SD	41202#J189: Output from GWAS pipeline using Phesant derived variables from UKBiobank
ukb-b-8707	Diagnoses - main ICD10: J22 Unspecified acute lower respiratory infection	1	NA	Binary	463010	9851867	2018	MRC-IEU	Ben Elsworth	NA	Males and Females	European	3135	459875	NA	SD	41202#J22: Output from GWAS pipeline using Phesant derived variables from UKBiobank
ukb-d-J32	Diagnoses - main ICD10: J32 Chronic sinusitis	0	NA	Binary	361194	9646741	2018	NA	Neale lab	NA	Males and Females	European	1179	360015	NA	NA	NA
ukb-b-7211	Diagnoses - main ICD10: J33.9 Nasal polyp, unspecified	1	NA	Binary	463010	9851867	2018	MRC-IEU	Ben Elsworth	NA	Males and Females	European	1373	461637	NA	SD	41202#J339: Output from GWAS pipeline using Phesant derived variables from UKBiobank
ukb-b-3770	Diagnoses - main ICD10: J34.2 Deviated nasal septum	1	NA	Binary	463010	9851867	2018	MRC-IEU	Ben Elsworth	NA	Males and Females	European	3256	459754	NA	SD	41202#J342: Output from GWAS pipeline using Phesant derived variables from UKBiobank
ukb-b-19045	Diagnoses - main ICD10: J34.8 Other specified disorders of nose and nasal sinuses	1	NA	Binary	463010	9851867	2018	MRC-IEU	Ben Elsworth	NA	Males and Females	European	1567	461443	NA	SD	41202#J348: Output from GWAS pipeline using Phesant derived variables from UKBiobank
ukb-d-J38	Diagnoses - main ICD10: J38 Diseases of vocal cords and larynx, not elsewhere classified	0	NA	Binary	361194	9664495	2018	NA	Neale lab	NA	Males and Females	European	1168	360026	NA	NA	NA
ukb-d-J45	Diagnoses - main ICD10: J45 Asthma	0	NA	Binary	361194	10336532	2018	NA	Neale lab	NA	Males and Females	European	1693	359501	NA	NA	NA
ukb-b-20208	Diagnoses - main ICD10: J45.9 Asthma, unspecified	1	NA	Binary	463010	9851867	2018	MRC-IEU	Ben Elsworth	NA	Males and Females	European	1877	461133	NA	SD	41202#J459: Output from GWAS pipeline using Phesant derived variables from UKBiobank
ukb-d-K01	Diagnoses - main ICD10: K01 Embedded and impacted teeth	0	NA	Binary	361194	9938632	2018	NA	Neale lab	NA	Males and Females	European	1443	359751	NA	NA	NA
ukb-b-7534	Diagnoses - main ICD10: K01.1 Impacted teeth	1	NA	Binary	463010	9851867	2018	MRC-IEU	Ben Elsworth	NA	Males and Females	European	1596	461414	NA	SD	41202#K011: Output from GWAS pipeline using Phesant derived variables from UKBiobank
ukb-d-K02	Diagnoses - main ICD10: K02 Dental caries	0	NA	Binary	361194	10658307	2018	NA	Neale lab	NA	Males and Females	European	2110	359084	NA	NA	NA
ukb-b-4770	Diagnoses - main ICD10: K02.9 Dental caries, unspecified	1	NA	Binary	463010	9851867	2018	MRC-IEU	Ben Elsworth	NA	Males and Females	European	1997	461013	NA	SD	41202#K029: Output from GWAS pipeline using Phesant derived variables from UKBiobank
ukb-d-K04	Diagnoses - main ICD10: K04 Diseases of pulp and periapical tissues	0	NA	Binary	361194	10149479	2018	NA	Neale lab	NA	Males and Females	European	1609	359585	NA	NA	NA
ukb-d-K08	Diagnoses - main ICD10: K08 Other disorders of teeth and supporting structures	0	NA	Binary	361194	10395717	2018	NA	Neale lab	NA	Males and Females	European	1838	359356	NA	NA	NA
ukb-b-11771	Diagnoses - main ICD10: K08.3 Retained dental root	1	NA	Binary	463010	9851867	2018	MRC-IEU	Ben Elsworth	NA	Males and Females	European	1039	461971	NA	SD	41202#K083: Output from GWAS pipeline using Phesant derived variables from UKBiobank
ukb-d-K13	Diagnoses - main ICD10: K13 Other diseases of lip and oral mucosa	0	NA	Binary	361194	10646670	2018	NA	Neale lab	NA	Males and Females	European	2157	359037	NA	NA	NA
ukb-b-18785	Diagnoses - main ICD10: K13.7 Other and unspecified lesions of oral mucosa	1	NA	Binary	463010	9851867	2018	MRC-IEU	Ben Elsworth	NA	Males and Females	European	1124	461886	NA	SD	41202#K137: Output from GWAS pipeline using Phesant derived variables from UKBiobank
ukb-b-19354	Diagnoses - main ICD10: K20 Oesophagitis	1	NA	Binary	463010	9851867	2018	MRC-IEU	Ben Elsworth	NA	Males and Females	European	4931	458079	NA	SD	41202#K20: Output from GWAS pipeline using Phesant derived variables from UKBiobank
ukb-b-1386	Diagnoses - main ICD10: K21.9 Gastro-oesophageal reflux disease without oesophagitis	1	NA	Binary	463010	9851867	2018	MRC-IEU	Ben Elsworth	NA	Males and Females	European	4651	458359	NA	SD	41202#K219: Output from GWAS pipeline using Phesant derived variables from UKBiobank
ukb-b-13731	Diagnoses - main ICD10: K22.1 Ulcer of oesophagus	1	NA	Binary	463010	9851867	2018	MRC-IEU	Ben Elsworth	NA	Males and Females	European	3251	459759	NA	SD	41202#K221: Output from GWAS pipeline using Phesant derived variables from UKBiobank
ukb-d-K25	Diagnoses - main ICD10: K25 Gastric ulcer	0	NA	Binary	361194	10452088	2018	NA	Neale lab	NA	Males and Females	European	1834	359360	NA	NA	NA
ukb-b-4738	Diagnoses - main ICD10: K25.9 Unspecified as acute or chronic, without haemorrhage or perforation	1	NA	Binary	463010	9851867	2018	MRC-IEU	Ben Elsworth	NA	Males and Females	European	1493	461517	NA	SD	41202#K259: Output from GWAS pipeline using Phesant derived variables from UKBiobank
ukb-d-K26	Diagnoses - main ICD10: K26 Duodenal ulcer	0	NA	Binary	361194	9827456	2018	NA	Neale lab	NA	Males and Females	European	1291	359903	NA	NA	NA
ukb-b-6716	Diagnoses - main ICD10: K29.5 Chronic gastritis, unspecified	1	NA	Binary	463010	9851867	2018	MRC-IEU	Ben Elsworth	NA	Males and Females	European	1467	461543	NA	SD	41202#K295: Output from GWAS pipeline using Phesant derived variables from UKBiobank
ukb-b-1306	Diagnoses - main ICD10: K29.6 Other gastritis	1	NA	Binary	463010	9851867	2018	MRC-IEU	Ben Elsworth	NA	Males and Females	European	1830	461180	NA	SD	41202#K296: Output from GWAS pipeline using Phesant derived variables from UKBiobank
ukb-b-18822	Diagnoses - main ICD10: K29.7 Gastritis, unspecified	1	NA	Binary	463010	9851867	2018	MRC-IEU	Ben Elsworth	NA	Males and Females	European	6247	456763	NA	SD	41202#K297: Output from GWAS pipeline using Phesant derived variables from UKBiobank
ukb-b-12316	Diagnoses - main ICD10: K29.8 Duodenitis	1	NA	Binary	463010	9851867	2018	MRC-IEU	Ben Elsworth	NA	Males and Females	European	1800	461210	NA	SD	41202#K298: Output from GWAS pipeline using Phesant derived variables from UKBiobank
ukb-b-14814	Diagnoses - main ICD10: K30 Dyspepsia	1	NA	Binary	463010	9851867	2018	MRC-IEU	Ben Elsworth	NA	Males and Females	European	7662	455348	NA	SD	41202#K30: Output from GWAS pipeline using Phesant derived variables from UKBiobank
ukb-d-K31	Diagnoses - main ICD10: K31 Other diseases of stomach and duodenum	0	NA	Binary	361194	10922781	2018	NA	Neale lab	NA	Males and Females	European	2374	358820	NA	NA	NA
ukb-b-7330	Diagnoses - main ICD10: K31.7 Polyp of stomach and duodenum	1	NA	Binary	463010	9851867	2018	MRC-IEU	Ben Elsworth	NA	Males and Females	European	1053	461957	NA	SD	41202#K317: Output from GWAS pipeline using Phesant derived variables from UKBiobank
ukb-b-686	Diagnoses - main ICD10: K35.9 Acute appendicitis, unspecified	1	NA	Binary	463010	9851867	2018	MRC-IEU	Ben Elsworth	NA	Males and Females	European	1568	461442	NA	SD	41202#K359: Output from GWAS pipeline using Phesant derived variables from UKBiobank
ukb-b-11369	Diagnoses - main ICD10: K40.2 Bilateral inguinal hernia, without obstruction or gangrene	1	NA	Binary	463010	9851867	2018	MRC-IEU	Ben Elsworth	NA	Males and Females	European	1125	461885	NA	SD	41202#K402: Output from GWAS pipeline using Phesant derived variables from UKBiobank
ukb-b-5369	Diagnoses - main ICD10: K40.9 Unilateral or unspecified inguinal hernia, without obstruction or gangrene	1	NA	Binary	463010	9851867	2018	MRC-IEU	Ben Elsworth	NA	Males and Females	European	11789	451221	NA	SD	41202#K409: Output from GWAS pipeline using Phesant derived variables from UKBiobank
ukb-d-K42	Diagnoses - main ICD10: K42 Umbilical hernia	0	NA	Binary	361194	10914854	2018	NA	Neale lab	NA	Males and Females	European	2528	358666	NA	NA	NA
ukb-b-14541	Diagnoses - main ICD10: K42.9 Umbilical hernia without obstruction or gangrene	1	NA	Binary	463010	9851867	2018	MRC-IEU	Ben Elsworth	NA	Males and Females	European	2315	460695	NA	SD	41202#K429: Output from GWAS pipeline using Phesant derived variables from UKBiobank
ukb-b-677	Diagnoses - main ICD10: K43.9 Ventral hernia without obstruction or gangrene	1	NA	Binary	463010	9851867	2018	MRC-IEU	Ben Elsworth	NA	Males and Females	European	2188	460822	NA	SD	41202#K439: Output from GWAS pipeline using Phesant derived variables from UKBiobank
ukb-b-8848	Diagnoses - main ICD10: K44.9 Diaphragmatic hernia without obstruction or gangrene	1	NA	Binary	463010	9851867	2018	MRC-IEU	Ben Elsworth	NA	Males and Females	European	8072	454938	NA	SD	41202#K449: Output from GWAS pipeline using Phesant derived variables from UKBiobank
ukb-b-19386	Diagnoses - main ICD10: K51.9 Ulcerative colitis, unspecified	1	NA	Binary	463010	9851867	2018	MRC-IEU	Ben Elsworth	NA	Males and Females	European	1987	461023	NA	SD	41202#K519: Output from GWAS pipeline using Phesant derived variables from UKBiobank
ukb-b-20189	Diagnoses - main ICD10: K52.9 Non-infective gastro-enteritis and colitis, unspecified	1	NA	Binary	463010	9851867	2018	MRC-IEU	Ben Elsworth	NA	Males and Females	European	9463	453547	NA	SD	41202#K529: Output from GWAS pipeline using Phesant derived variables from UKBiobank
ukb-d-K56	Diagnoses - main ICD10: K56 Paralytic ileus and intestinal obstruction without hernia	0	NA	Binary	361194	10525332	2018	NA	Neale lab	NA	Males and Females	European	1851	359343	NA	NA	NA
ukb-b-9797	Diagnoses - main ICD10: K56.6 Other and unspecified intestinal obstruction	1	NA	Binary	463010	9851867	2018	MRC-IEU	Ben Elsworth	NA	Males and Females	European	1006	462004	NA	SD	41202#K566: Output from GWAS pipeline using Phesant derived variables from UKBiobank
ukb-b-10859	Diagnoses - main ICD10: K57.3 Diverticular disease of large intestine without perforation or abscess	1	NA	Binary	463010	9851867	2018	MRC-IEU	Ben Elsworth	NA	Males and Females	European	8429	454581	NA	SD	41202#K573: Output from GWAS pipeline using Phesant derived variables from UKBiobank
ukb-b-7166	Diagnoses - main ICD10: K57.9 Diverticular disease of intestine, part unspecified, without perforation or abscess	1	NA	Binary	463010	9851867	2018	MRC-IEU	Ben Elsworth	NA	Males and Females	European	2345	460665	NA	SD	41202#K579: Output from GWAS pipeline using Phesant derived variables from UKBiobank
ukb-d-K58	Diagnoses - main ICD10: K58 Irritable bowel syndrome	0	NA	Binary	361194	9548933	2018	NA	Neale lab	NA	Males and Females	European	1121	360073	NA	NA	NA
ukb-b-17961	Diagnoses - main ICD10: K58.9 Irritable bowel syndrome without diarrhoea	1	NA	Binary	463010	9851867	2018	MRC-IEU	Ben Elsworth	NA	Males and Females	European	1047	461963	NA	SD	41202#K589: Output from GWAS pipeline using Phesant derived variables from UKBiobank
ukb-d-K59	Diagnoses - main ICD10: K59 Other functional intestinal disorders	0	NA	Binary	361194	11677253	2018	NA	Neale lab	NA	Males and Females	European	3712	357482	NA	NA	NA
ukb-b-6779	Diagnoses - main ICD10: K59.0 Constipation	1	NA	Binary	463010	9851867	2018	MRC-IEU	Ben Elsworth	NA	Males and Females	European	3328	459682	NA	SD	41202#K590: Output from GWAS pipeline using Phesant derived variables from UKBiobank
ukb-b-11274	Diagnoses - main ICD10: K60.2 Anal fissure, unspecified	1	NA	Binary	463010	9851867	2018	MRC-IEU	Ben Elsworth	NA	Males and Females	European	1093	461917	NA	SD	41202#K602: Output from GWAS pipeline using Phesant derived variables from UKBiobank
ukb-b-6721	Diagnoses - main ICD10: K60.3 Anal fistula	1	NA	Binary	463010	9851867	2018	MRC-IEU	Ben Elsworth	NA	Males and Females	European	1003	462007	NA	SD	41202#K603: Output from GWAS pipeline using Phesant derived variables from UKBiobank
ukb-d-K61	Diagnoses - main ICD10: K61 Abscess of anal and rectal regions	0	NA	Binary	361194	9446877	2018	NA	Neale lab	NA	Males and Females	European	1053	360141	NA	NA	NA
ukb-b-5018	Diagnoses - main ICD10: K61.0 Anal abscess	1	NA	Binary	463010	9851867	2018	MRC-IEU	Ben Elsworth	NA	Males and Females	European	1034	461976	NA	SD	41202#K610: Output from GWAS pipeline using Phesant derived variables from UKBiobank
ukb-b-19805	Diagnoses - main ICD10: K62.1 Rectal polyp	1	NA	Binary	463010	9851867	2018	MRC-IEU	Ben Elsworth	NA	Males and Females	European	2800	460210	NA	SD	41202#K621: Output from GWAS pipeline using Phesant derived variables from UKBiobank
ukb-b-11582	Diagnoses - main ICD10: K62.5 Haemorrhage of anus and rectum	1	NA	Binary	463010	9851867	2018	MRC-IEU	Ben Elsworth	NA	Males and Females	European	9579	453431	NA	SD	41202#K625: Output from GWAS pipeline using Phesant derived variables from UKBiobank
ukb-b-13464	Diagnoses - main ICD10: K62.8 Other specified diseases of anus and rectum	1	NA	Binary	463010	9851867	2018	MRC-IEU	Ben Elsworth	NA	Males and Females	European	1406	461604	NA	SD	41202#K628: Output from GWAS pipeline using Phesant derived variables from UKBiobank
ukb-d-K63	Diagnoses - main ICD10: K63 Other diseases of intestine	0	NA	Binary	361194	12981984	2018	NA	Neale lab	NA	Males and Females	European	8041	353153	NA	NA	NA
ukb-b-1968	Diagnoses - main ICD10: K63.5 Polyp of colon	1	NA	Binary	463010	9851867	2018	MRC-IEU	Ben Elsworth	NA	Males and Females	European	4779	458231	NA	SD	41202#K635: Output from GWAS pipeline using Phesant derived variables from UKBiobank
ukb-b-10362	Diagnoses - main ICD10: K80.0 Calculus of gallbladder with acute cholecystitis	1	NA	Binary	463010	9851867	2018	MRC-IEU	Ben Elsworth	NA	Males and Females	European	1100	461910	NA	SD	41202#K800: Output from GWAS pipeline using Phesant derived variables from UKBiobank
ukb-b-8988	Diagnoses - main ICD10: K80.1 Calculus of gallbladder with other cholecystitis	1	NA	Binary	463010	9851867	2018	MRC-IEU	Ben Elsworth	NA	Males and Females	European	3932	459078	NA	SD	41202#K801: Output from GWAS pipeline using Phesant derived variables from UKBiobank
ukb-b-11020	Diagnoses - main ICD10: K80.2 Calculus of gallbladder without cholecystitis	1	NA	Binary	463010	9851867	2018	MRC-IEU	Ben Elsworth	NA	Males and Females	European	5766	457244	NA	SD	41202#K802: Output from GWAS pipeline using Phesant derived variables from UKBiobank
ukb-b-8268	Diagnoses - main ICD10: K80.5 Calculus of bile duct without cholangitis or cholecystitis	1	NA	Binary	463010	9851867	2018	MRC-IEU	Ben Elsworth	NA	Males and Females	European	1706	461304	NA	SD	41202#K805: Output from GWAS pipeline using Phesant derived variables from UKBiobank
ukb-d-K81	Diagnoses - main ICD10: K81 Cholecystitis	0	NA	Binary	361194	10491778	2018	NA	Neale lab	NA	Males and Females	European	1930	359264	NA	NA	NA
ukb-b-19388	Diagnoses - main ICD10: K85 Acute pancreatitis	1	NA	Binary	463010	9851867	2018	MRC-IEU	Ben Elsworth	NA	Males and Females	European	1215	461795	NA	SD	41202#K85: Output from GWAS pipeline using Phesant derived variables from UKBiobank
ukb-d-K92	Diagnoses - main ICD10: K92 Other diseases of digestive system	0	NA	Binary	361194	12178688	2018	NA	Neale lab	NA	Males and Females	European	5019	356175	NA	NA	NA
ukb-b-1853	Diagnoses - main ICD10: K92.0 Haematemesis	1	NA	Binary	463010	9851867	2018	MRC-IEU	Ben Elsworth	NA	Males and Females	European	1065	461945	NA	SD	41202#K920: Output from GWAS pipeline using Phesant derived variables from UKBiobank
ukb-b-5590	Diagnoses - main ICD10: K92.1 Melaena	1	NA	Binary	463010	9851867	2018	MRC-IEU	Ben Elsworth	NA	Males and Females	European	1318	461692	NA	SD	41202#K921: Output from GWAS pipeline using Phesant derived variables from UKBiobank
ukb-b-14999	Diagnoses - main ICD10: K92.2 Gastro-intestinal haemorrhage, unspecified	1	NA	Binary	463010	9851867	2018	MRC-IEU	Ben Elsworth	NA	Males and Females	European	1449	461561	NA	SD	41202#K922: Output from GWAS pipeline using Phesant derived variables from UKBiobank
ukb-d-L02	Diagnoses - main ICD10: L02 Cutaneous abscess, furuncle and carbuncle	0	NA	Binary	361194	10267743	2018	NA	Neale lab	NA	Males and Females	European	1697	359497	NA	NA	NA
ukb-b-11908	Diagnoses - main ICD10: L03.1 Cellulitis of other parts of limb	1	NA	Binary	463010	9851867	2018	MRC-IEU	Ben Elsworth	NA	Males and Females	European	3360	459650	NA	SD	41202#L031: Output from GWAS pipeline using Phesant derived variables from UKBiobank
ukb-d-L57	Diagnoses - main ICD10: L57 Skin changes due to chronic exposure to nonionising radiation	0	NA	Binary	361194	9967146	2018	NA	Neale lab	NA	Males and Females	European	1447	359747	NA	NA	NA
ukb-d-L72	Diagnoses - main ICD10: L72 Follicular cysts of skin and subcutaneous tissue	0	NA	Binary	361194	12569642	2018	NA	Neale lab	NA	Males and Females	European	6644	354550	NA	NA	NA
ukb-b-15003	Diagnoses - main ICD10: L72.0 Epidermal cyst	1	NA	Binary	463010	9851867	2018	MRC-IEU	Ben Elsworth	NA	Males and Females	European	1863	461147	NA	SD	41202#L720: Output from GWAS pipeline using Phesant derived variables from UKBiobank
ukb-b-14436	Diagnoses - main ICD10: L72.9 Follicular cyst of skin and subcutaneous tissue, unspecified	1	NA	Binary	463010	9851867	2018	MRC-IEU	Ben Elsworth	NA	Males and Females	European	1001	462009	NA	SD	41202#L729: Output from GWAS pipeline using Phesant derived variables from UKBiobank
ukb-b-501	Diagnoses - main ICD10: L82 Seborrhoeic keratosis	1	NA	Binary	463010	9851867	2018	MRC-IEU	Ben Elsworth	NA	Males and Females	European	1957	461053	NA	SD	41202#L82: Output from GWAS pipeline using Phesant derived variables from UKBiobank
ukb-d-L90	Diagnoses - main ICD10: L90 Atrophic disorders of skin	0	NA	Binary	361194	10231534	2018	NA	Neale lab	NA	Males and Females	European	1683	359511	NA	NA	NA
ukb-b-11403	Diagnoses - main ICD10: L90.5 Scar conditions and fibrosis of skin	1	NA	Binary	463010	9851867	2018	MRC-IEU	Ben Elsworth	NA	Males and Females	European	1464	461546	NA	SD	41202#L905: Output from GWAS pipeline using Phesant derived variables from UKBiobank
ukb-d-L98	Diagnoses - main ICD10: L98 Other disorders of skin and subcutaneous tissue, not elsewhere classified	0	NA	Binary	361194	11712121	2018	NA	Neale lab	NA	Males and Females	European	4035	357159	NA	NA	NA
ukb-b-20190	Diagnoses - main ICD10: L98.9 Disorder of skin and subcutaneous tissue, unspecified	1	NA	Binary	463010	9851867	2018	MRC-IEU	Ben Elsworth	NA	Males and Females	European	3223	459787	NA	SD	41202#L989: Output from GWAS pipeline using Phesant derived variables from UKBiobank
ukb-d-M06	Diagnoses - main ICD10: M06 Other rheumatoid arthritis	0	NA	Binary	361194	9944222	2018	NA	Neale lab	NA	Males and Females	European	1401	359793	NA	NA	NA
ukb-d-M13	Diagnoses - main ICD10: M13 Other arthritis	0	NA	Binary	361194	9613046	2018	NA	Neale lab	NA	Males and Females	European	1110	360084	NA	NA	NA
ukb-d-M15	Diagnoses - main ICD10: M15 Polyarthrosis	0	NA	Binary	361194	9844004	2018	NA	Neale lab	NA	Males and Females	European	1264	359930	NA	NA	NA
ukb-b-2875	Diagnoses - main ICD10: M16.1 Other primary coxarthrosis	1	NA	Binary	463010	9851867	2018	MRC-IEU	Ben Elsworth	NA	Males and Females	European	2876	460134	NA	SD	41202#M161: Output from GWAS pipeline using Phesant derived variables from UKBiobank
ukb-b-19829	Diagnoses - main ICD10: M16.9 Coxarthrosis, unspecified	1	NA	Binary	463010	9851867	2018	MRC-IEU	Ben Elsworth	NA	Males and Females	European	4255	458755	NA	SD	41202#M169: Output from GWAS pipeline using Phesant derived variables from UKBiobank
ukb-b-7700	Diagnoses - main ICD10: M17.1 Other primary gonarthrosis	1	NA	Binary	463010	9851867	2018	MRC-IEU	Ben Elsworth	NA	Males and Females	European	3540	459470	NA	SD	41202#M171: Output from GWAS pipeline using Phesant derived variables from UKBiobank
ukb-b-18379	Diagnoses - main ICD10: M17.9 Gonarthrosis, unspecified	1	NA	Binary	463010	9851867	2018	MRC-IEU	Ben Elsworth	NA	Males and Females	European	6497	456513	NA	SD	41202#M179: Output from GWAS pipeline using Phesant derived variables from UKBiobank
ukb-d-M19	Diagnoses - main ICD10: M19 Other arthrosis	0	NA	Binary	361194	11809339	2018	NA	Neale lab	NA	Males and Females	European	4165	357029	NA	NA	NA
ukb-b-6026	Diagnoses - main ICD10: M20.1 Hallux valgus (acquired)	1	NA	Binary	463010	9851867	2018	MRC-IEU	Ben Elsworth	NA	Males and Females	European	5304	457706	NA	SD	41202#M201: Output from GWAS pipeline using Phesant derived variables from UKBiobank
ukb-b-4280	Diagnoses - main ICD10: M20.2 Hallux rigidus	1	NA	Binary	463010	9851867	2018	MRC-IEU	Ben Elsworth	NA	Males and Females	European	1083	461927	NA	SD	41202#M202: Output from GWAS pipeline using Phesant derived variables from UKBiobank
ukb-b-8213	Diagnoses - main ICD10: M23.2 Derangement of meniscus due to old tear or injury	1	NA	Binary	463010	9851867	2018	MRC-IEU	Ben Elsworth	NA	Males and Females	European	1433	461577	NA	SD	41202#M232: Output from GWAS pipeline using Phesant derived variables from UKBiobank
ukb-b-9694	Diagnoses - main ICD10: M23.22 Derangement of meniscus due to old tear or injury (Posterior cruciate ligament or Posterior horn of medial meniscus)	1	NA	Binary	463010	9851867	2018	MRC-IEU	Ben Elsworth	NA	Males and Females	European	1958	461052	NA	SD	41202#M2322: Output from GWAS pipeline using Phesant derived variables from UKBiobank
ukb-b-7118	Diagnoses - main ICD10: M23.23 Derangement of meniscus due to old tear or injury (Medial collateral ligament or Other and unspecified medial meniscus)	1	NA	Binary	463010	9851867	2018	MRC-IEU	Ben Elsworth	NA	Males and Females	European	2596	460414	NA	SD	41202#M2323: Output from GWAS pipeline using Phesant derived variables from UKBiobank
ukb-d-M25	Diagnoses - main ICD10: M25 Other joint disorders, not elsewhere classified	0	NA	Binary	361194	12784029	2018	NA	Neale lab	NA	Males and Females	European	7218	353976	NA	NA	NA
ukb-b-13019	Diagnoses - main ICD10: M25.5 Pain in joint	1	NA	Binary	463010	9851867	2018	MRC-IEU	Ben Elsworth	NA	Males and Females	European	1451	461559	NA	SD	41202#M255: Output from GWAS pipeline using Phesant derived variables from UKBiobank
ukb-b-2083	Diagnoses - main ICD10: M25.56 Pain in joint (Lower leg)	1	NA	Binary	463010	9851867	2018	MRC-IEU	Ben Elsworth	NA	Males and Females	European	1624	461386	NA	SD	41202#M2556: Output from GWAS pipeline using Phesant derived variables from UKBiobank
ukb-d-M47	Diagnoses - main ICD10: M47 Spondylosis	0	NA	Binary	361194	10621815	2018	NA	Neale lab	NA	Males and Females	European	2004	359190	NA	NA	NA
ukb-d-M48	Diagnoses - main ICD10: M48 Other spondylopathies	0	NA	Binary	361194	10484433	2018	NA	Neale lab	NA	Males and Females	European	1890	359304	NA	NA	NA
ukb-d-M51	Diagnoses - main ICD10: M51 Other intervertebral disk disorders	0	NA	Binary	361194	12016668	2018	NA	Neale lab	NA	Males and Females	European	4690	356504	NA	NA	NA
ukb-b-18279	Diagnoses - main ICD10: M51.1 Lumbar and other intervertebral disk disorders with radiculopathy	1	NA	Binary	463010	9851867	2018	MRC-IEU	Ben Elsworth	NA	Males and Females	European	2214	460796	NA	SD	41202#M511: Output from GWAS pipeline using Phesant derived variables from UKBiobank
ukb-b-12872	Diagnoses - main ICD10: M51.2 Other specified intervertebral disk displacement	1	NA	Binary	463010	9851867	2018	MRC-IEU	Ben Elsworth	NA	Males and Females	European	1433	461577	NA	SD	41202#M512: Output from GWAS pipeline using Phesant derived variables from UKBiobank
ukb-b-19807	Diagnoses - main ICD10: M51.3 Other specified intervertebral disk degeneration	1	NA	Binary	463010	9851867	2018	MRC-IEU	Ben Elsworth	NA	Males and Females	European	1045	461965	NA	SD	41202#M513: Output from GWAS pipeline using Phesant derived variables from UKBiobank
ukb-b-1557	Diagnoses - main ICD10: M54.5 Low back pain	1	NA	Binary	463010	9851867	2018	MRC-IEU	Ben Elsworth	NA	Males and Females	European	2439	460571	NA	SD	41202#M545: Output from GWAS pipeline using Phesant derived variables from UKBiobank
ukb-b-19813	Diagnoses - main ICD10: M54.56 Low back pain (Lumbar region)	1	NA	Binary	463010	9851867	2018	MRC-IEU	Ben Elsworth	NA	Males and Females	European	1423	461587	NA	SD	41202#M5456: Output from GWAS pipeline using Phesant derived variables from UKBiobank
ukb-b-10873	Diagnoses - main ICD10: M54.59 Low back pain (Site unspecified)	1	NA	Binary	463010	9851867	2018	MRC-IEU	Ben Elsworth	NA	Males and Females	European	1446	461564	NA	SD	41202#M5459: Output from GWAS pipeline using Phesant derived variables from UKBiobank
ukb-d-M65	Diagnoses - main ICD10: M65 Synovitis and tenosynovitis	0	NA	Binary	361194	11090107	2018	NA	Neale lab	NA	Males and Females	European	2812	358382	NA	NA	NA
ukb-b-8085	Diagnoses - main ICD10: M65.3 Trigger finger	1	NA	Binary	463010	9851867	2018	MRC-IEU	Ben Elsworth	NA	Males and Females	European	1059	461951	NA	SD	41202#M653: Output from GWAS pipeline using Phesant derived variables from UKBiobank
ukb-b-12364	Diagnoses - main ICD10: M67.4 Ganglion	1	NA	Binary	463010	9851867	2018	MRC-IEU	Ben Elsworth	NA	Males and Females	European	2172	460838	NA	SD	41202#M674: Output from GWAS pipeline using Phesant derived variables from UKBiobank
ukb-d-M70	Diagnoses - main ICD10: M70 Soft tissue disorders related to use, overuse and pressure	0	NA	Binary	361194	9498351	2018	NA	Neale lab	NA	Males and Females	European	1079	360115	NA	NA	NA
ukb-b-13517	Diagnoses - main ICD10: M72.0 Palmar fascial fibromatosis [Dupuytren]	1	NA	Binary	463010	9851867	2018	MRC-IEU	Ben Elsworth	NA	Males and Females	European	1366	461644	NA	SD	41202#M720: Output from GWAS pipeline using Phesant derived variables from UKBiobank
ukb-b-4772	Diagnoses - main ICD10: M72.04 Palmar fascial fibromatosis [Dupuytren]-Hand	1	NA	Binary	463010	9851867	2018	MRC-IEU	Ben Elsworth	NA	Males and Females	European	1537	461473	NA	SD	41202#M7204: Output from GWAS pipeline using Phesant derived variables from UKBiobank
ukb-d-M75	Diagnoses - main ICD10: M75 Shoulder lesions	0	NA	Binary	361194	12697508	2018	NA	Neale lab	NA	Males and Females	European	7040	354154	NA	NA	NA
ukb-b-4921	Diagnoses - main ICD10: M75.0 Adhesive capsulitis of shoulder	1	NA	Binary	463010	9851867	2018	MRC-IEU	Ben Elsworth	NA	Males and Females	European	1083	461927	NA	SD	41202#M750: Output from GWAS pipeline using Phesant derived variables from UKBiobank
ukb-b-50	Diagnoses - main ICD10: M75.1 Rotator cuff syndrome	1	NA	Binary	463010	9851867	2018	MRC-IEU	Ben Elsworth	NA	Males and Females	European	1767	461243	NA	SD	41202#M751: Output from GWAS pipeline using Phesant derived variables from UKBiobank
ukb-b-1418	Diagnoses - main ICD10: M75.4 Impingement syndrome of shoulder	1	NA	Binary	463010	9851867	2018	MRC-IEU	Ben Elsworth	NA	Males and Females	European	2901	460109	NA	SD	41202#M754: Output from GWAS pipeline using Phesant derived variables from UKBiobank
ukb-d-M79	Diagnoses - main ICD10: M79 Other soft tissue disorders, not elsewhere classified	0	NA	Binary	361194	12694879	2018	NA	Neale lab	NA	Males and Females	European	6946	354248	NA	NA	NA
ukb-b-9708	Diagnoses - main ICD10: M79.66 Pain in limb (Lower leg)	1	NA	Binary	463010	9851867	2018	MRC-IEU	Ben Elsworth	NA	Males and Females	European	1689	461321	NA	SD	41202#M7966: Output from GWAS pipeline using Phesant derived variables from UKBiobank
ukb-b-12620	Diagnoses - main ICD10: M79.86 Other specified soft tissue disorders (Lower leg)	1	NA	Binary	463010	9851867	2018	MRC-IEU	Ben Elsworth	NA	Males and Females	European	1592	461418	NA	SD	41202#M7986: Output from GWAS pipeline using Phesant derived variables from UKBiobank
ukb-d-M84	Diagnoses - main ICD10: M84 Disorders of continuity of bone	0	NA	Binary	361194	9477869	2018	NA	Neale lab	NA	Males and Females	European	1065	360129	NA	NA	NA
ukb-d-N13	Diagnoses - main ICD10: N13 Obstructive and reflux uropathy	0	NA	Binary	361194	9916449	2018	NA	Neale lab	NA	Males and Females	European	1359	359835	NA	NA	NA
ukb-b-18372	Diagnoses - main ICD10: N20.0 Calculus of kidney	1	NA	Binary	463010	9851867	2018	MRC-IEU	Ben Elsworth	NA	Males and Females	European	2186	460824	NA	SD	41202#N200: Output from GWAS pipeline using Phesant derived variables from UKBiobank
ukb-b-18629	Diagnoses - main ICD10: N20.1 Calculus of ureter	1	NA	Binary	463010	9851867	2018	MRC-IEU	Ben Elsworth	NA	Males and Females	European	1979	461031	NA	SD	41202#N201: Output from GWAS pipeline using Phesant derived variables from UKBiobank
ukb-b-16313	Diagnoses - main ICD10: N23 Unspecified renal colic	1	NA	Binary	463010	9851867	2018	MRC-IEU	Ben Elsworth	NA	Males and Females	European	1675	461335	NA	SD	41202#N23: Output from GWAS pipeline using Phesant derived variables from UKBiobank
ukb-d-N30	Diagnoses - main ICD10: N30 Cystitis	0	NA	Binary	361194	10163237	2018	NA	Neale lab	NA	Males and Females	European	1575	359619	NA	NA	NA
ukb-d-N31	Diagnoses - main ICD10: N31 Neuromuscular dysfunction of bladder, not elsewhere classified	0	NA	Binary	361194	9417337	2018	NA	Neale lab	NA	Males and Females	European	1014	360180	NA	NA	NA
ukb-b-123	Diagnoses - main ICD10: N32.0 Bladder-neck obstruction	1	NA	Binary	463010	9851867	2018	MRC-IEU	Ben Elsworth	NA	Males and Females	European	1385	461625	NA	SD	41202#N320: Output from GWAS pipeline using Phesant derived variables from UKBiobank
ukb-b-373	Diagnoses - main ICD10: N32.8 Other specified disorders of bladder	1	NA	Binary	463010	9851867	2018	MRC-IEU	Ben Elsworth	NA	Males and Females	European	2225	460785	NA	SD	41202#N328: Output from GWAS pipeline using Phesant derived variables from UKBiobank
ukb-d-N35	Diagnoses - main ICD10: N35 Urethral stricture	0	NA	Binary	361194	10537634	2018	NA	Neale lab	NA	Males and Females	European	2037	359157	NA	NA	NA
ukb-b-9074	Diagnoses - main ICD10: N35.9 Urethral stricture, unspecified	1	NA	Binary	463010	9851867	2018	MRC-IEU	Ben Elsworth	NA	Males and Females	European	2013	460997	NA	SD	41202#N359: Output from GWAS pipeline using Phesant derived variables from UKBiobank
ukb-d-N39	Diagnoses - main ICD10: N39 Other disorders of urinary system	0	NA	Binary	361194	13435311	2018	NA	Neale lab	NA	Males and Females	European	10551	350643	NA	NA	NA
ukb-b-8814	Diagnoses - main ICD10: N39.0 Urinary tract infection, site not specified	1	NA	Binary	463010	9851867	2018	MRC-IEU	Ben Elsworth	NA	Males and Females	European	5447	457563	NA	SD	41202#N390: Output from GWAS pipeline using Phesant derived variables from UKBiobank
ukb-b-9873	Diagnoses - main ICD10: N39.3 Stress incontinence	1	NA	Binary	463010	9851867	2018	MRC-IEU	Ben Elsworth	NA	Males and Females	European	4340	458670	NA	SD	41202#N393: Output from GWAS pipeline using Phesant derived variables from UKBiobank
ukb-b-11601	Diagnoses - main ICD10: N40 Hyperplasia of prostate	1	NA	Binary	463010	9851867	2018	MRC-IEU	Ben Elsworth	NA	Males and Females	European	4670	458340	NA	SD	41202#N40: Output from GWAS pipeline using Phesant derived variables from UKBiobank
ukb-b-10668	Diagnoses - main ICD10: N47 Redundant prepuce, phimosis and paraphimosis	1	NA	Binary	463010	9851867	2018	MRC-IEU	Ben Elsworth	NA	Males and Females	European	1541	461469	NA	SD	41202#N47: Output from GWAS pipeline using Phesant derived variables from UKBiobank
ukb-d-N48	Diagnoses - main ICD10: N48 Other disorders of penis	0	NA	Binary	361194	9784099	2018	NA	Neale lab	NA	Males and Females	European	1317	359877	NA	NA	NA
ukb-d-N50	Diagnoses - main ICD10: N50 Other disorders of male genital organs	0	NA	Binary	361194	10323518	2018	NA	Neale lab	NA	Males and Females	European	1829	359365	NA	NA	NA
ukb-b-3802	Diagnoses - main ICD10: N50.8 Other specified disorders of male genital organs	1	NA	Binary	463010	9851867	2018	MRC-IEU	Ben Elsworth	NA	Males and Females	European	1408	461602	NA	SD	41202#N508: Output from GWAS pipeline using Phesant derived variables from UKBiobank
ukb-d-N60	Diagnoses - main ICD10: N60 Benign mammary dysplasia	0	NA	Binary	361194	9554384	2018	NA	Neale lab	NA	Males and Females	European	1157	360037	NA	NA	NA
ukb-b-7428	Diagnoses - main ICD10: N63 Unspecified lump in breast	1	NA	Binary	463010	9851867	2018	MRC-IEU	Ben Elsworth	NA	Males and Females	European	1481	461529	NA	SD	41202#N63: Output from GWAS pipeline using Phesant derived variables from UKBiobank
ukb-d-N80	Diagnoses - main ICD10: N80 Endometriosis	0	NA	Binary	361194	9983671	2018	NA	Neale lab	NA	Males and Females	European	1496	359698	NA	NA	NA
ukb-b-11298	Diagnoses - main ICD10: N81.1 Cystocele	1	NA	Binary	463010	9851867	2018	MRC-IEU	Ben Elsworth	NA	Males and Females	European	2554	460456	NA	SD	41202#N811: Output from GWAS pipeline using Phesant derived variables from UKBiobank
ukb-b-5118	Diagnoses - main ICD10: N81.2 Incomplete uterovaginal prolapse	1	NA	Binary	463010	9851867	2018	MRC-IEU	Ben Elsworth	NA	Males and Females	European	2317	460693	NA	SD	41202#N812: Output from GWAS pipeline using Phesant derived variables from UKBiobank
ukb-b-6082	Diagnoses - main ICD10: N81.6 Rectocele	1	NA	Binary	463010	9851867	2018	MRC-IEU	Ben Elsworth	NA	Males and Females	European	1597	461413	NA	SD	41202#N816: Output from GWAS pipeline using Phesant derived variables from UKBiobank
ukb-d-N83	Diagnoses - main ICD10: N83 Noninflammatory disorders of ovary, Fallopian tube and broad ligament	0	NA	Binary	361194	10642236	2018	NA	Neale lab	NA	Males and Females	European	2215	358979	NA	NA	NA
ukb-b-5253	Diagnoses - main ICD10: N83.2 Other and unspecified ovarian cysts	1	NA	Binary	463010	9851867	2018	MRC-IEU	Ben Elsworth	NA	Males and Females	European	2018	460992	NA	SD	41202#N832: Output from GWAS pipeline using Phesant derived variables from UKBiobank
ukb-d-N84	Diagnoses - main ICD10: N84 Polyp of female genital tract	0	NA	Binary	361194	12641822	2018	NA	Neale lab	NA	Males and Females	European	6986	354208	NA	NA	NA
ukb-b-12944	Diagnoses - main ICD10: N84.0 Polyp of corpus uteri	1	NA	Binary	463010	9851867	2018	MRC-IEU	Ben Elsworth	NA	Males and Females	European	5419	457591	NA	SD	41202#N840: Output from GWAS pipeline using Phesant derived variables from UKBiobank
ukb-b-19110	Diagnoses - main ICD10: N84.1 Polyp of cervix uteri	1	NA	Binary	463010	9851867	2018	MRC-IEU	Ben Elsworth	NA	Males and Females	European	2307	460703	NA	SD	41202#N841: Output from GWAS pipeline using Phesant derived variables from UKBiobank
ukb-d-N85	Diagnoses - main ICD10: N85 Other noninflammatory disorders of uterus, except cervix	0	NA	Binary	361194	9971554	2018	NA	Neale lab	NA	Males and Females	European	1489	359705	NA	NA	NA
ukb-d-N87	Diagnoses - main ICD10: N87 Dysplasia of cervix uteri	0	NA	Binary	361194	9463389	2018	NA	Neale lab	NA	Males and Females	European	1102	360092	NA	NA	NA
ukb-d-N90	Diagnoses - main ICD10: N90 Other noninflammatory disorders of vulva and perineum	0	NA	Binary	361194	9452872	2018	NA	Neale lab	NA	Males and Females	European	1077	360117	NA	NA	NA
ukb-d-N92	Diagnoses - main ICD10: N92 Excessive, frequent and irregular menstruation	0	NA	Binary	361194	12983417	2018	NA	Neale lab	NA	Males and Females	European	8475	352719	NA	NA	NA
ukb-b-11572	Diagnoses - main ICD10: N92.0 Excessive and frequent menstruation with regular cycle	1	NA	Binary	463010	9851867	2018	MRC-IEU	Ben Elsworth	NA	Males and Females	European	6641	456369	NA	SD	41202#N920: Output from GWAS pipeline using Phesant derived variables from UKBiobank
ukb-b-9591	Diagnoses - main ICD10: N92.1 Excessive and frequent menstruation with irregular cycle	1	NA	Binary	463010	9851867	2018	MRC-IEU	Ben Elsworth	NA	Males and Females	European	2048	460962	NA	SD	41202#N921: Output from GWAS pipeline using Phesant derived variables from UKBiobank
ukb-b-14674	Diagnoses - main ICD10: N92.6 Irregular menstruation, unspecified	1	NA	Binary	463010	9851867	2018	MRC-IEU	Ben Elsworth	NA	Males and Females	European	1279	461731	NA	SD	41202#N926: Output from GWAS pipeline using Phesant derived variables from UKBiobank
ukb-d-N93	Diagnoses - main ICD10: N93 Other abnormal uterine and vaginal bleeding	0	NA	Binary	361194	10822472	2018	NA	Neale lab	NA	Males and Females	European	2455	358739	NA	NA	NA
ukb-b-14086	Diagnoses - main ICD10: N93.8 Other specified abnormal uterine and vaginal bleeding	1	NA	Binary	463010	9851867	2018	MRC-IEU	Ben Elsworth	NA	Males and Females	European	1392	461618	NA	SD	41202#N938: Output from GWAS pipeline using Phesant derived variables from UKBiobank
ukb-b-10849	Diagnoses - main ICD10: N93.9 Abnormal uterine and vaginal bleeding, unspecified	1	NA	Binary	463010	9851867	2018	MRC-IEU	Ben Elsworth	NA	Males and Females	European	1145	461865	NA	SD	41202#N939: Output from GWAS pipeline using Phesant derived variables from UKBiobank
ukb-d-N94	Diagnoses - main ICD10: N94 Pain and other conditions associated with female genital organs and menstrual cycle	0	NA	Binary	361194	9743932	2018	NA	Neale lab	NA	Males and Females	European	1295	359899	NA	NA	NA
ukb-d-N95	Diagnoses - main ICD10: N95 Menopausal and other perimenopausal disorders	0	NA	Binary	361194	12513012	2018	NA	Neale lab	NA	Males and Females	European	6496	354698	NA	NA	NA
ukb-b-5712	Diagnoses - main ICD10: N95.0 Postmenopausal bleeding	1	NA	Binary	463010	9851867	2018	MRC-IEU	Ben Elsworth	NA	Males and Females	European	6874	456136	NA	SD	41202#N950: Output from GWAS pipeline using Phesant derived variables from UKBiobank
ukb-d-O02	Diagnoses - main ICD10: O02 Other abnormal products of conception	0	NA	Binary	361194	9470568	2018	NA	Neale lab	NA	Males and Females	European	1106	360088	NA	NA	NA
ukb-b-13414	Diagnoses - main ICD10: O02.1 Missed abortion	1	NA	Binary	463010	9851867	2018	MRC-IEU	Ben Elsworth	NA	Males and Females	European	1317	461693	NA	SD	41202#O021: Output from GWAS pipeline using Phesant derived variables from UKBiobank
ukb-d-O03	Diagnoses - main ICD10: O03 Spontaneous abortion	0	NA	Binary	361194	9543298	2018	NA	Neale lab	NA	Males and Females	European	1150	360044	NA	NA	NA
ukb-b-13696	Diagnoses - main ICD10: O04.9 Complete or unspecified, without complication	1	NA	Binary	463010	9851867	2018	MRC-IEU	Ben Elsworth	NA	Males and Females	European	1068	461942	NA	SD	41202#O049: Output from GWAS pipeline using Phesant derived variables from UKBiobank
ukb-d-O26	Diagnoses - main ICD10: O26 Maternal care for other conditions predominantly related to pregnancy	0	NA	Binary	361194	9719752	2018	NA	Neale lab	NA	Males and Females	European	1289	359905	NA	NA	NA
ukb-b-9712	Diagnoses - main ICD10: O26.8 Other specified pregnancy-related conditions	1	NA	Binary	463010	9851867	2018	MRC-IEU	Ben Elsworth	NA	Males and Females	European	1302	461708	NA	SD	41202#O268: Output from GWAS pipeline using Phesant derived variables from UKBiobank
ukb-d-O36	Diagnoses - main ICD10: O36 Maternal care for other known or suspected foetal problems	0	NA	Binary	361194	9527604	2018	NA	Neale lab	NA	Males and Females	European	1149	360045	NA	NA	NA
ukb-d-O63	Diagnoses - main ICD10: O63 Long labour	0	NA	Binary	361194	9392820	2018	NA	Neale lab	NA	Males and Females	European	1060	360134	NA	NA	NA
ukb-b-2194	Diagnoses - main ICD10: O63.1 Prolonged second stage (of labour)	1	NA	Binary	463010	9851867	2018	MRC-IEU	Ben Elsworth	NA	Males and Females	European	1027	461983	NA	SD	41202#O631: Output from GWAS pipeline using Phesant derived variables from UKBiobank
ukb-d-O68	Diagnoses - main ICD10: O68 Labour and delivery complicated by foetal stress [distress]	0	NA	Binary	361194	10348373	2018	NA	Neale lab	NA	Males and Females	European	1882	359312	NA	NA	NA
ukb-b-9270	Diagnoses - main ICD10: O68.0 Labour and delivery complicated by foetal heart rate anomaly	1	NA	Binary	463010	9851867	2018	MRC-IEU	Ben Elsworth	NA	Males and Females	European	1009	462001	NA	SD	41202#O680: Output from GWAS pipeline using Phesant derived variables from UKBiobank
ukb-d-O70	Diagnoses - main ICD10: O70 Perineal laceration during delivery	0	NA	Binary	361194	11192727	2018	NA	Neale lab	NA	Males and Females	European	3077	358117	NA	NA	NA
ukb-b-9597	Diagnoses - main ICD10: O70.0 First degree perineal laceration during delivery	1	NA	Binary	463010	9851867	2018	MRC-IEU	Ben Elsworth	NA	Males and Females	European	1620	461390	NA	SD	41202#O700: Output from GWAS pipeline using Phesant derived variables from UKBiobank
ukb-b-10712	Diagnoses - main ICD10: O70.1 Second degree perineal laceration during delivery	1	NA	Binary	463010	9851867	2018	MRC-IEU	Ben Elsworth	NA	Males and Females	European	2469	460541	NA	SD	41202#O701: Output from GWAS pipeline using Phesant derived variables from UKBiobank
ukb-d-O80	Diagnoses - main ICD10: O80 Single spontaneous delivery	0	NA	Binary	361194	10148559	2018	NA	Neale lab	NA	Males and Females	European	1672	359522	NA	NA	NA
ukb-b-6330	Diagnoses - main ICD10: O80.0 Spontaneous vertex delivery	1	NA	Binary	463010	9851867	2018	MRC-IEU	Ben Elsworth	NA	Males and Females	European	1726	461284	NA	SD	41202#O800: Output from GWAS pipeline using Phesant derived variables from UKBiobank
ukb-d-R00	Diagnoses - main ICD10: R00 Abnormalities of heart beat	0	NA	Binary	361194	10905198	2018	NA	Neale lab	NA	Males and Females	European	2542	358652	NA	NA	NA
ukb-b-19109	Diagnoses - main ICD10: R00.2 Palpitations	1	NA	Binary	463010	9851867	2018	MRC-IEU	Ben Elsworth	NA	Males and Females	European	1729	461281	NA	SD	41202#R002: Output from GWAS pipeline using Phesant derived variables from UKBiobank
ukb-b-11412	Diagnoses - main ICD10: R04.0 Epistaxis	1	NA	Binary	463010	9851867	2018	MRC-IEU	Ben Elsworth	NA	Males and Females	European	1512	461498	NA	SD	41202#R040: Output from GWAS pipeline using Phesant derived variables from UKBiobank
ukb-b-4507	Diagnoses - main ICD10: R04.2 Haemoptysis	1	NA	Binary	463010	9851867	2018	MRC-IEU	Ben Elsworth	NA	Males and Females	European	1240	461770	NA	SD	41202#R042: Output from GWAS pipeline using Phesant derived variables from UKBiobank
ukb-d-R06	Diagnoses - main ICD10: R06 Abnormalities of breathing	0	NA	Binary	361194	11785055	2018	NA	Neale lab	NA	Males and Females	European	4126	357068	NA	NA	NA
ukb-b-6562	Diagnoses - main ICD10: R06.0 Dyspnoea	1	NA	Binary	463010	9851867	2018	MRC-IEU	Ben Elsworth	NA	Males and Females	European	1931	461079	NA	SD	41202#R060: Output from GWAS pipeline using Phesant derived variables from UKBiobank
ukb-b-19769	Diagnoses - main ICD10: R06.5 Mouth breathing	1	NA	Binary	463010	9851867	2018	MRC-IEU	Ben Elsworth	NA	Males and Females	European	1536	461474	NA	SD	41202#R065: Output from GWAS pipeline using Phesant derived variables from UKBiobank
ukb-b-20386	Diagnoses - main ICD10: R07.2 Precordial pain	1	NA	Binary	463010	9851867	2018	MRC-IEU	Ben Elsworth	NA	Males and Females	European	2140	460870	NA	SD	41202#R072: Output from GWAS pipeline using Phesant derived variables from UKBiobank
ukb-b-14603	Diagnoses - main ICD10: R07.3 Other chest pain	1	NA	Binary	463010	9851867	2018	MRC-IEU	Ben Elsworth	NA	Males and Females	European	7146	455864	NA	SD	41202#R073: Output from GWAS pipeline using Phesant derived variables from UKBiobank
ukb-b-10771	Diagnoses - main ICD10: R07.4 Chest pain, unspecified	1	NA	Binary	463010	9851867	2018	MRC-IEU	Ben Elsworth	NA	Males and Females	European	18203	444807	NA	SD	41202#R074: Output from GWAS pipeline using Phesant derived variables from UKBiobank
ukb-b-6608	Diagnoses - main ICD10: R10.1 Pain localised to upper abdomen	1	NA	Binary	463010	9851867	2018	MRC-IEU	Ben Elsworth	NA	Males and Females	European	5981	457029	NA	SD	41202#R101: Output from GWAS pipeline using Phesant derived variables from UKBiobank
ukb-b-17456	Diagnoses - main ICD10: R10.3 Pain localised to other parts of lower abdomen	1	NA	Binary	463010	9851867	2018	MRC-IEU	Ben Elsworth	NA	Males and Females	European	4823	458187	NA	SD	41202#R103: Output from GWAS pipeline using Phesant derived variables from UKBiobank
ukb-b-6223	Diagnoses - main ICD10: R10.4 Other and unspecified abdominal pain	1	NA	Binary	463010	9851867	2018	MRC-IEU	Ben Elsworth	NA	Males and Females	European	11925	451085	NA	SD	41202#R104: Output from GWAS pipeline using Phesant derived variables from UKBiobank
ukb-b-19419	Diagnoses - main ICD10: R11 Nausea and vomiting	1	NA	Binary	463010	9851867	2018	MRC-IEU	Ben Elsworth	NA	Males and Females	European	2143	460867	NA	SD	41202#R11: Output from GWAS pipeline using Phesant derived variables from UKBiobank
ukb-b-7073	Diagnoses - main ICD10: R13 Dysphagia	1	NA	Binary	463010	9851867	2018	MRC-IEU	Ben Elsworth	NA	Males and Females	European	3012	459998	NA	SD	41202#R13: Output from GWAS pipeline using Phesant derived variables from UKBiobank
ukb-d-R19	Diagnoses - main ICD10: R19 Other symptoms and signs involving the digestive system and abdomen	0	NA	Binary	361194	13079011	2018	NA	Neale lab	NA	Males and Females	European	8796	352398	NA	NA	NA
ukb-b-12789	Diagnoses - main ICD10: R19.4 Change in bowel habit	1	NA	Binary	463010	9851867	2018	MRC-IEU	Ben Elsworth	NA	Males and Females	European	5540	457470	NA	SD	41202#R194: Output from GWAS pipeline using Phesant derived variables from UKBiobank
ukb-d-R22	Diagnoses - main ICD10: R22 Localised swelling, mass and lump of skin and subcutaneous tissue	0	NA	Binary	361194	9836898	2018	NA	Neale lab	NA	Males and Females	European	1358	359836	NA	NA	NA
ukb-b-17885	Diagnoses - main ICD10: R31 Unspecified haematuria	1	NA	Binary	463010	9851867	2018	MRC-IEU	Ben Elsworth	NA	Males and Females	European	11437	451573	NA	SD	41202#R31: Output from GWAS pipeline using Phesant derived variables from UKBiobank
ukb-b-11531	Diagnoses - main ICD10: R32 Unspecified urinary incontinence	1	NA	Binary	463010	9851867	2018	MRC-IEU	Ben Elsworth	NA	Males and Females	European	1011	461999	NA	SD	41202#R32: Output from GWAS pipeline using Phesant derived variables from UKBiobank
ukb-b-20162	Diagnoses - main ICD10: R33 Retention of urine	1	NA	Binary	463010	9851867	2018	MRC-IEU	Ben Elsworth	NA	Males and Females	European	2106	460904	NA	SD	41202#R33: Output from GWAS pipeline using Phesant derived variables from UKBiobank
ukb-b-5948	Diagnoses - main ICD10: R35 Polyuria	1	NA	Binary	463010	9851867	2018	MRC-IEU	Ben Elsworth	NA	Males and Females	European	1984	461026	NA	SD	41202#R35: Output from GWAS pipeline using Phesant derived variables from UKBiobank
ukb-d-R39	Diagnoses - main ICD10: R39 Other symptoms and signs involving the urinary system	0	NA	Binary	361194	11010999	2018	NA	Neale lab	NA	Males and Females	European	2698	358496	NA	NA	NA
ukb-b-17287	Diagnoses - main ICD10: R39.8 Other and unspecified symptoms and signs involving the urinary system	1	NA	Binary	463010	9851867	2018	MRC-IEU	Ben Elsworth	NA	Males and Females	European	1943	461067	NA	SD	41202#R398: Output from GWAS pipeline using Phesant derived variables from UKBiobank
ukb-b-5655	Diagnoses - main ICD10: R42 Dizziness and giddiness	1	NA	Binary	463010	9851867	2018	MRC-IEU	Ben Elsworth	NA	Males and Females	European	1557	461453	NA	SD	41202#R42: Output from GWAS pipeline using Phesant derived variables from UKBiobank
ukb-d-R50	Diagnoses - main ICD10: R50 Fever of unknown origin	0	NA	Binary	361194	9602226	2018	NA	Neale lab	NA	Males and Females	European	1156	360038	NA	NA	NA
ukb-b-1977	Diagnoses - main ICD10: R51 Headache	1	NA	Binary	463010	9851867	2018	MRC-IEU	Ben Elsworth	NA	Males and Females	European	4293	458717	NA	SD	41202#R51: Output from GWAS pipeline using Phesant derived variables from UKBiobank
ukb-b-16187	Diagnoses - main ICD10: R55 Syncope and collapse	1	NA	Binary	463010	9851867	2018	MRC-IEU	Ben Elsworth	NA	Males and Females	European	4748	458262	NA	SD	41202#R55: Output from GWAS pipeline using Phesant derived variables from UKBiobank
ukb-d-R56	Diagnoses - main ICD10: R56 Convulsions, not elsewhere classified	0	NA	Binary	361194	9473630	2018	NA	Neale lab	NA	Males and Females	European	1077	360117	NA	NA	NA
ukb-d-R59	Diagnoses - main ICD10: R59 Enlarged lymph nodes	0	NA	Binary	361194	9342835	2018	NA	Neale lab	NA	Males and Females	European	1011	360183	NA	NA	NA
ukb-d-R63	Diagnoses - main ICD10: R63 Symptoms and signs concerning food and fluid intake	0	NA	Binary	361194	9758930	2018	NA	Neale lab	NA	Males and Females	European	1279	359915	NA	NA	NA
ukb-b-12510	Diagnoses - main ICD10: R69 Unknown and unspecified causes of morbidity	1	NA	Binary	463010	9851867	2018	MRC-IEU	Ben Elsworth	NA	Males and Females	European	9411	453599	NA	SD	41202#R69: Output from GWAS pipeline using Phesant derived variables from UKBiobank
ukb-d-R79	Diagnoses - main ICD10: R79 Other abnormal findings of blood chemistry	0	NA	Binary	361194	10945514	2018	NA	Neale lab	NA	Males and Females	European	2622	358572	NA	NA	NA
ukb-b-11052	Diagnoses - main ICD10: R79.8 Other specified abnormal findings of blood chemistry	1	NA	Binary	463010	9851867	2018	MRC-IEU	Ben Elsworth	NA	Males and Females	European	1972	461038	NA	SD	41202#R798: Output from GWAS pipeline using Phesant derived variables from UKBiobank
ukb-d-R87	Diagnoses - main ICD10: R87 Abnormal findings in specimens from female genital organs	0	NA	Binary	361194	9429978	2018	NA	Neale lab	NA	Males and Females	European	1084	360110	NA	NA	NA
ukb-b-15836	Diagnoses - main ICD10: R87.6 Abnormal cytological findings	1	NA	Binary	463010	9851867	2018	MRC-IEU	Ben Elsworth	NA	Males and Females	European	1283	461727	NA	SD	41202#R876: Output from GWAS pipeline using Phesant derived variables from UKBiobank
ukb-d-R93	Diagnoses - main ICD10: R93 Abnormal findings on diagnostic imaging of other body structures	0	NA	Binary	361194	9686136	2018	NA	Neale lab	NA	Males and Females	European	1217	359977	NA	NA	NA
ukb-d-S01	Diagnoses - main ICD10: S01 Open wound of head	0	NA	Binary	361194	10217696	2018	NA	Neale lab	NA	Males and Females	European	1694	359500	NA	NA	NA
ukb-d-S02	Diagnoses - main ICD10: S02 Fracture of skull and facial bones	0	NA	Binary	361194	9812773	2018	NA	Neale lab	NA	Males and Females	European	1351	359843	NA	NA	NA
ukb-b-16917	Diagnoses - main ICD10: S09.9 Unspecified injury of head	1	NA	Binary	463010	9851867	2018	MRC-IEU	Ben Elsworth	NA	Males and Females	European	1394	461616	NA	SD	41202#S099: Output from GWAS pipeline using Phesant derived variables from UKBiobank
ukb-d-S42	Diagnoses - main ICD10: S42 Fracture of shoulder and upper arm	0	NA	Binary	361194	10299263	2018	NA	Neale lab	NA	Males and Females	European	1791	359403	NA	NA	NA
ukb-b-2804	Diagnoses - main ICD10: S52.50 Fracture of lower end of radius (closed)	1	NA	Binary	463010	9851867	2018	MRC-IEU	Ben Elsworth	NA	Males and Females	European	2696	460314	NA	SD	41202#S5250: Output from GWAS pipeline using Phesant derived variables from UKBiobank
ukb-d-S61	Diagnoses - main ICD10: S61 Open wound of wrist and hand	0	NA	Binary	361194	10351001	2018	NA	Neale lab	NA	Males and Females	European	1865	359329	NA	NA	NA
ukb-d-S62	Diagnoses - main ICD10: S62 Fracture at wrist and hand level	0	NA	Binary	361194	10256723	2018	NA	Neale lab	NA	Males and Females	European	1763	359431	NA	NA	NA
ukb-d-S72	Diagnoses - main ICD10: S72 Fracture of femur	0	NA	Binary	361194	10334675	2018	NA	Neale lab	NA	Males and Females	European	1803	359391	NA	NA	NA
ukb-d-S82	Diagnoses - main ICD10: S82 Fracture of lower leg, including ankle	0	NA	Binary	361194	11892748	2018	NA	Neale lab	NA	Males and Females	European	4557	356637	NA	NA	NA
ukb-b-5946	Diagnoses - main ICD10: S82.80 Fractures of other parts of lower leg (closed)	1	NA	Binary	463010	9851867	2018	MRC-IEU	Ben Elsworth	NA	Males and Females	European	1479	461531	NA	SD	41202#S8280: Output from GWAS pipeline using Phesant derived variables from UKBiobank
ukb-d-T39	Diagnoses - main ICD10: T39 Poisoning by nonopioid analgesics, antipyretics and antirheumatics	0	NA	Binary	361194	9574655	2018	NA	Neale lab	NA	Males and Females	European	1161	360033	NA	NA	NA
ukb-b-12187	Diagnoses - main ICD10: T39.1 4-Aminophenol derivatives	1	NA	Binary	463010	9851867	2018	MRC-IEU	Ben Elsworth	NA	Males and Females	European	1014	461996	NA	SD	41202#T391: Output from GWAS pipeline using Phesant derived variables from UKBiobank
ukb-d-T81	Diagnoses - main ICD10: T81 Complications of procedures, not elsewhere classified	0	NA	Binary	361194	12271187	2018	NA	Neale lab	NA	Males and Females	European	5550	355644	NA	NA	NA
ukb-b-17587	Diagnoses - main ICD10: T81.0 Haemorrhage and haematoma complicating a procedure, not elsewhere classified	1	NA	Binary	463010	9851867	2018	MRC-IEU	Ben Elsworth	NA	Males and Females	European	1896	461114	NA	SD	41202#T810: Output from GWAS pipeline using Phesant derived variables from UKBiobank
ukb-b-5545	Diagnoses - main ICD10: T81.4 Infection following a procedure, not elsewhere classified	1	NA	Binary	463010	9851867	2018	MRC-IEU	Ben Elsworth	NA	Males and Females	European	2305	460705	NA	SD	41202#T814: Output from GWAS pipeline using Phesant derived variables from UKBiobank
ukb-d-T82	Diagnoses - main ICD10: T82 Complications of cardiac and vascular prosthetic devices, implants and grafts	0	NA	Binary	361194	9611719	2018	NA	Neale lab	NA	Males and Females	European	1133	360061	NA	NA	NA
ukb-d-T84	Diagnoses - main ICD10: T84 Complications of internal orthopaedic prosthetic devices, implants and grafts	0	NA	Binary	361194	11593283	2018	NA	Neale lab	NA	Males and Females	European	3719	357475	NA	NA	NA
ukb-b-14753	Diagnoses - main ICD10: T84.0 Mechanical complication of internal joint prosthesis	1	NA	Binary	463010	9851867	2018	MRC-IEU	Ben Elsworth	NA	Males and Females	European	1178	461832	NA	SD	41202#T840: Output from GWAS pipeline using Phesant derived variables from UKBiobank
ukb-b-11680	Diagnoses - main ICD10: T84.8 Other complications of internal orthopaedic prosthetic devices, implants and grafts	1	NA	Binary	463010	9851867	2018	MRC-IEU	Ben Elsworth	NA	Males and Females	European	1027	461983	NA	SD	41202#T848: Output from GWAS pipeline using Phesant derived variables from UKBiobank
ukb-d-T85	Diagnoses - main ICD10: T85 Complications of other internal prosthetic devices, implants and grafts	0	NA	Binary	361194	10044505	2018	NA	Neale lab	NA	Males and Females	European	1501	359693	NA	NA	NA
ukb-d-Z01	Diagnoses - main ICD10: Z01 Other special examinations and investigations of persons without complaint or reported diagnosis	0	NA	Binary	361194	9827456	2018	NA	Neale lab	NA	Males and Females	European	1370	359824	NA	NA	NA
ukb-d-Z03	Diagnoses - main ICD10: Z03 Medical observation and evaluation for suspected diseases and conditions	0	NA	Binary	361194	12062980	2018	NA	Neale lab	NA	Males and Females	European	4951	356243	NA	NA	NA
ukb-b-7425	Diagnoses - main ICD10: Z03.8 Observation for other suspected diseases and conditions	1	NA	Binary	463010	9851867	2018	MRC-IEU	Ben Elsworth	NA	Males and Females	European	3143	459867	NA	SD	41202#Z038: Output from GWAS pipeline using Phesant derived variables from UKBiobank
ukb-d-Z08	Diagnoses - main ICD10: Z08 Follow-up examination after treatment for malignant neoplasm	0	NA	Binary	361194	11776613	2018	NA	Neale lab	NA	Males and Females	European	4214	356980	NA	NA	NA
ukb-b-1261	Diagnoses - main ICD10: Z08.0 Follow-up examination after surgery for malignant neoplasm	1	NA	Binary	463010	9851867	2018	MRC-IEU	Ben Elsworth	NA	Males and Females	European	3005	460005	NA	SD	41202#Z080: Output from GWAS pipeline using Phesant derived variables from UKBiobank
ukb-b-10102	Diagnoses - main ICD10: Z09.0 Follow-up examination after surgery for other conditions	1	NA	Binary	463010	9851867	2018	MRC-IEU	Ben Elsworth	NA	Males and Females	European	3424	459586	NA	SD	41202#Z090: Output from GWAS pipeline using Phesant derived variables from UKBiobank
ukb-b-14479	Diagnoses - main ICD10: Z09.8 Follow-up examination after other treatment for other conditions	1	NA	Binary	463010	9851867	2018	MRC-IEU	Ben Elsworth	NA	Males and Females	European	2243	460767	NA	SD	41202#Z098: Output from GWAS pipeline using Phesant derived variables from UKBiobank
ukb-b-10646	Diagnoses - main ICD10: Z09.9 Follow-up examination after unspecified treatment for other conditions	1	NA	Binary	463010	9851867	2018	MRC-IEU	Ben Elsworth	NA	Males and Females	European	1942	461068	NA	SD	41202#Z099: Output from GWAS pipeline using Phesant derived variables from UKBiobank
ukb-d-Z12	Diagnoses - main ICD10: Z12 Special screening examination for neoplasms	0	NA	Binary	361194	11748066	2018	NA	Neale lab	NA	Males and Females	European	4152	357042	NA	NA	NA
ukb-b-203	Diagnoses - main ICD10: Z12.1 Special screening examination for neoplasm of intestinal tract	1	NA	Binary	463010	9851867	2018	MRC-IEU	Ben Elsworth	NA	Males and Females	European	3103	459907	NA	SD	41202#Z121: Output from GWAS pipeline using Phesant derived variables from UKBiobank
ukb-d-Z13	Diagnoses - main ICD10: Z13 Special screening examination for other diseases and disorders	0	NA	Binary	361194	10673821	2018	NA	Neale lab	NA	Males and Females	European	2236	358958	NA	NA	NA
ukb-b-20038	Diagnoses - main ICD10: Z13.8 Special screening examination for other specified diseases and disorders	1	NA	Binary	463010	9851867	2018	MRC-IEU	Ben Elsworth	NA	Males and Females	European	1246	461764	NA	SD	41202#Z138: Output from GWAS pipeline using Phesant derived variables from UKBiobank
ukb-d-Z30	Diagnoses - main ICD10: Z30 Contraceptive management	0	NA	Binary	361194	12475388	2018	NA	Neale lab	NA	Males and Females	European	6392	354802	NA	NA	NA
ukb-b-7418	Diagnoses - main ICD10: Z30.2 Sterilisation	1	NA	Binary	463010	9851867	2018	MRC-IEU	Ben Elsworth	NA	Males and Females	European	7023	455987	NA	SD	41202#Z302: Output from GWAS pipeline using Phesant derived variables from UKBiobank
ukb-d-Z42	Diagnoses - main ICD10: Z42 Follow-up care involving plastic surgery	0	NA	Binary	361194	10444808	2018	NA	Neale lab	NA	Males and Females	European	1963	359231	NA	NA	NA
ukb-b-18897	Diagnoses - main ICD10: Z42.1 Follow-up care involving plastic surgery of breast	1	NA	Binary	463010	9851867	2018	MRC-IEU	Ben Elsworth	NA	Males and Females	European	1522	461488	NA	SD	41202#Z421: Output from GWAS pipeline using Phesant derived variables from UKBiobank
ukb-d-Z43	Diagnoses - main ICD10: Z43 Attention to artificial openings	0	NA	Binary	361194	9864581	2018	NA	Neale lab	NA	Males and Females	European	1356	359838	NA	NA	NA
ukb-d-Z45	Diagnoses - main ICD10: Z45 Adjustment and management of implanted device	0	NA	Binary	361194	10720303	2018	NA	Neale lab	NA	Males and Females	European	2209	358985	NA	NA	NA
ukb-d-Z46	Diagnoses - main ICD10: Z46 Fitting and adjustment of other devices	0	NA	Binary	361194	11521299	2018	NA	Neale lab	NA	Males and Females	European	3614	357580	NA	NA	NA
ukb-b-7463	Diagnoses - main ICD10: Z46.6 Fitting and adjustment of urinary device	1	NA	Binary	463010	9851867	2018	MRC-IEU	Ben Elsworth	NA	Males and Females	European	2729	460281	NA	SD	41202#Z466: Output from GWAS pipeline using Phesant derived variables from UKBiobank
ukb-b-19542	Diagnoses - main ICD10: Z47.0 Follow-up care involving removal of fracture plate and other internal fixation device	1	NA	Binary	463010	9851867	2018	MRC-IEU	Ben Elsworth	NA	Males and Females	European	2730	460280	NA	SD	41202#Z470: Output from GWAS pipeline using Phesant derived variables from UKBiobank
ukb-d-Z53	Diagnoses - main ICD10: Z53 Persons encountering health services for specifie procedures, not carried out	0	NA	Binary	361194	10260311	2018	NA	Neale lab	NA	Males and Females	European	1754	359440	NA	NA	NA
ukb-b-9696	Diagnoses - main ICD10: Z53.8 Procedure not carried out for other reasons	1	NA	Binary	463010	9851867	2018	MRC-IEU	Ben Elsworth	NA	Males and Females	European	1155	461855	NA	SD	41202#Z538: Output from GWAS pipeline using Phesant derived variables from UKBiobank
ukb-b-7660	Diagnoses - main ICD9: 4549 Varicose veins of lower extremity without ulcer/inflammation	1	NA	Binary	463010	9851867	2018	MRC-IEU	Ben Elsworth	NA	Males and Females	European	1160	461850	NA	SD	41203#4549: Output from GWAS pipeline using Phesant derived variables from UKBiobank
ukb-b-471	Diagnoses - main ICD9: 6262 Excessive or frequent menstruation	1	NA	Binary	463010	9851867	2018	MRC-IEU	Ben Elsworth	NA	Males and Females	European	1374	461636	NA	SD	41203#6262: Output from GWAS pipeline using Phesant derived variables from UKBiobank
ukb-b-7793	Diagnoses - main ICD9: V252 Sterilization	1	NA	Binary	463010	9851867	2018	MRC-IEU	Ben Elsworth	NA	Males and Females	European	2211	460799	NA	SD	41203#V252: Output from GWAS pipeline using Phesant derived variables from UKBiobank
ukb-b-4423	Diagnoses - secondary ICD10: B95.6 Staphylococcus aureus as the cause of diseases classified to other chapters	1	NA	Binary	463010	9851867	2018	MRC-IEU	Ben Elsworth	NA	Males and Females	European	1716	461294	NA	SD	41204#B956: Output from GWAS pipeline using Phesant derived variables from UKBiobank
ukb-b-8877	Diagnoses - secondary ICD10: B96.2 Escherichia coli [E. coli] as the cause of diseases classified to other chapters	1	NA	Binary	463010	9851867	2018	MRC-IEU	Ben Elsworth	NA	Males and Females	European	1551	461459	NA	SD	41204#B962: Output from GWAS pipeline using Phesant derived variables from UKBiobank
ukb-b-20513	Diagnoses - secondary ICD10: B96.8 Other specified bacterial agents as the cause of diseases classified to other chapters	1	NA	Binary	463010	9851867	2018	MRC-IEU	Ben Elsworth	NA	Males and Females	European	4564	458446	NA	SD	41204#B968: Output from GWAS pipeline using Phesant derived variables from UKBiobank
ukb-b-9107	Diagnoses - secondary ICD10: C50.9 Breast, unspecified	1	NA	Binary	463010	9851867	2018	MRC-IEU	Ben Elsworth	NA	Males and Females	European	1372	461638	NA	SD	41204#C509: Output from GWAS pipeline using Phesant derived variables from UKBiobank
ukb-b-18843	Diagnoses - secondary ICD10: C61 Malignant neoplasm of prostate	1	NA	Binary	463010	9851867	2018	MRC-IEU	Ben Elsworth	NA	Males and Females	European	1309	461701	NA	SD	41204#C61: Output from GWAS pipeline using Phesant derived variables from UKBiobank
ukb-b-1702	Diagnoses - secondary ICD10: C77.3 Axillary and upper limb lymph nodes	1	NA	Binary	463010	9851867	2018	MRC-IEU	Ben Elsworth	NA	Males and Females	European	1580	461430	NA	SD	41204#C773: Output from GWAS pipeline using Phesant derived variables from UKBiobank
ukb-b-16713	Diagnoses - secondary ICD10: C78.7 Secondary malignant neoplasm of liver	1	NA	Binary	463010	9851867	2018	MRC-IEU	Ben Elsworth	NA	Males and Females	European	1139	461871	NA	SD	41204#C787: Output from GWAS pipeline using Phesant derived variables from UKBiobank
ukb-b-1147	Diagnoses - secondary ICD10: D12.5 Sigmoid colon	1	NA	Binary	463010	9851867	2018	MRC-IEU	Ben Elsworth	NA	Males and Females	European	1016	461994	NA	SD	41204#D125: Output from GWAS pipeline using Phesant derived variables from UKBiobank
ukb-b-6528	Diagnoses - secondary ICD10: D25.9 Leiomyoma of uterus, unspecified	1	NA	Binary	463010	9851867	2018	MRC-IEU	Ben Elsworth	NA	Males and Females	European	3024	459986	NA	SD	41204#D259: Output from GWAS pipeline using Phesant derived variables from UKBiobank
ukb-b-7844	Diagnoses - secondary ICD10: D50.9 Iron deficiency anaemia, unspecified	1	NA	Binary	463010	9851867	2018	MRC-IEU	Ben Elsworth	NA	Males and Females	European	1869	461141	NA	SD	41204#D509: Output from GWAS pipeline using Phesant derived variables from UKBiobank
ukb-b-15790	Diagnoses - secondary ICD10: D64.9 Anaemia, unspecified	1	NA	Binary	463010	9851867	2018	MRC-IEU	Ben Elsworth	NA	Males and Females	European	5264	457746	NA	SD	41204#D649: Output from GWAS pipeline using Phesant derived variables from UKBiobank
ukb-b-3229	Diagnoses - secondary ICD10: D70 Agranulocytosis	1	NA	Binary	463010	9851867	2018	MRC-IEU	Ben Elsworth	NA	Males and Females	European	1108	461902	NA	SD	41204#D70: Output from GWAS pipeline using Phesant derived variables from UKBiobank
ukb-b-4226	Diagnoses - secondary ICD10: E03.9 Hypothyroidism, unspecified	1	NA	Binary	463010	9851867	2018	MRC-IEU	Ben Elsworth	NA	Males and Females	European	9674	453336	NA	SD	41204#E039: Output from GWAS pipeline using Phesant derived variables from UKBiobank
ukb-b-10694	Diagnoses - secondary ICD10: E10.9 Without complications	1	NA	Binary	463010	9851867	2018	MRC-IEU	Ben Elsworth	NA	Males and Females	European	2076	460934	NA	SD	41204#E109: Output from GWAS pipeline using Phesant derived variables from UKBiobank
ukb-b-970	Diagnoses - secondary ICD10: E11.9 Without complications	1	NA	Binary	463010	9851867	2018	MRC-IEU	Ben Elsworth	NA	Males and Females	European	12045	450965	NA	SD	41204#E119: Output from GWAS pipeline using Phesant derived variables from UKBiobank
ukb-b-17532	Diagnoses - secondary ICD10: E14.9 Without complications	1	NA	Binary	463010	9851867	2018	MRC-IEU	Ben Elsworth	NA	Males and Females	European	1305	461705	NA	SD	41204#E149: Output from GWAS pipeline using Phesant derived variables from UKBiobank
ukb-b-15541	Diagnoses - secondary ICD10: E66.9 Obesity, unspecified	1	NA	Binary	463010	9851867	2018	MRC-IEU	Ben Elsworth	NA	Males and Females	European	4688	458322	NA	SD	41204#E669: Output from GWAS pipeline using Phesant derived variables from UKBiobank
ukb-b-12651	Diagnoses - secondary ICD10: E78.0 Pure hypercholesterolaemia	1	NA	Binary	463010	9851867	2018	MRC-IEU	Ben Elsworth	NA	Males and Females	European	22622	440388	NA	SD	41204#E780: Output from GWAS pipeline using Phesant derived variables from UKBiobank
ukb-b-17462	Diagnoses - secondary ICD10: E78.5 Hyperlipidaemia, unspecified	1	NA	Binary	463010	9851867	2018	MRC-IEU	Ben Elsworth	NA	Males and Females	European	3439	459571	NA	SD	41204#E785: Output from GWAS pipeline using Phesant derived variables from UKBiobank
ukb-b-16319	Diagnoses - secondary ICD10: E86 Volume depletion	1	NA	Binary	463010	9851867	2018	MRC-IEU	Ben Elsworth	NA	Males and Females	European	1149	461861	NA	SD	41204#E86: Output from GWAS pipeline using Phesant derived variables from UKBiobank
ukb-b-1176	Diagnoses - secondary ICD10: F10.0 Acute intoxication	1	NA	Binary	463010	9851867	2018	MRC-IEU	Ben Elsworth	NA	Males and Females	European	1204	461806	NA	SD	41204#F100: Output from GWAS pipeline using Phesant derived variables from UKBiobank
ukb-b-16056	Diagnoses - secondary ICD10: F10.1 Harmful use	1	NA	Binary	463010	9851867	2018	MRC-IEU	Ben Elsworth	NA	Males and Females	European	1802	461208	NA	SD	41204#F101: Output from GWAS pipeline using Phesant derived variables from UKBiobank
ukb-b-19651	Diagnoses - secondary ICD10: F10.2 Dependence syndrome	1	NA	Binary	463010	9851867	2018	MRC-IEU	Ben Elsworth	NA	Males and Females	European	1290	461720	NA	SD	41204#F102: Output from GWAS pipeline using Phesant derived variables from UKBiobank
ukb-b-2964	Diagnoses - secondary ICD10: F17.1 Harmful use	1	NA	Binary	463010	9851867	2018	MRC-IEU	Ben Elsworth	NA	Males and Females	European	1483	461527	NA	SD	41204#F171: Output from GWAS pipeline using Phesant derived variables from UKBiobank
ukb-b-20045	Diagnoses - secondary ICD10: F32.9 Depressive episode, unspecified	1	NA	Binary	463010	9851867	2018	MRC-IEU	Ben Elsworth	NA	Males and Females	European	5842	457168	NA	SD	41204#F329: Output from GWAS pipeline using Phesant derived variables from UKBiobank
ukb-b-11311	Diagnoses - secondary ICD10: F41.9 Anxiety disorder, unspecified	1	NA	Binary	463010	9851867	2018	MRC-IEU	Ben Elsworth	NA	Males and Females	European	1523	461487	NA	SD	41204#F419: Output from GWAS pipeline using Phesant derived variables from UKBiobank
ukb-b-1600	Diagnoses - secondary ICD10: G40.9 Epilepsy, unspecified	1	NA	Binary	463010	9851867	2018	MRC-IEU	Ben Elsworth	NA	Males and Females	European	2326	460684	NA	SD	41204#G409: Output from GWAS pipeline using Phesant derived variables from UKBiobank
ukb-b-7853	Diagnoses - secondary ICD10: G47.3 Sleep apnoea	1	NA	Binary	463010	9851867	2018	MRC-IEU	Ben Elsworth	NA	Males and Females	European	1385	461625	NA	SD	41204#G473: Output from GWAS pipeline using Phesant derived variables from UKBiobank
ukb-b-1220	Diagnoses - secondary ICD10: G55.1 Nerve root and plexus compressions in intervertebral disk disorders	1	NA	Binary	463010	9851867	2018	MRC-IEU	Ben Elsworth	NA	Males and Females	European	2298	460712	NA	SD	41204#G551: Output from GWAS pipeline using Phesant derived variables from UKBiobank
ukb-b-12493	Diagnoses - secondary ICD10: I10 Essential (primary) hypertension	1	NA	Binary	463010	9851867	2018	MRC-IEU	Ben Elsworth	NA	Males and Females	European	54358	408652	NA	SD	41204#I10: Output from GWAS pipeline using Phesant derived variables from UKBiobank
ukb-b-19955	Diagnoses - secondary ICD10: I12.0 Hypertensive renal disease with renal failure	1	NA	Binary	463010	9851867	2018	MRC-IEU	Ben Elsworth	NA	Males and Females	European	1146	461864	NA	SD	41204#I120: Output from GWAS pipeline using Phesant derived variables from UKBiobank
ukb-b-10756	Diagnoses - secondary ICD10: I20.0 Unstable angina	1	NA	Binary	463010	9851867	2018	MRC-IEU	Ben Elsworth	NA	Males and Females	European	1543	461467	NA	SD	41204#I200: Output from GWAS pipeline using Phesant derived variables from UKBiobank
ukb-b-15686	Diagnoses - secondary ICD10: I20.9 Angina pectoris, unspecified	1	NA	Binary	463010	9851867	2018	MRC-IEU	Ben Elsworth	NA	Males and Females	European	10083	452927	NA	SD	41204#I209: Output from GWAS pipeline using Phesant derived variables from UKBiobank
ukb-b-7436	Diagnoses - secondary ICD10: I25.1 Atherosclerotic heart disease	1	NA	Binary	463010	9851867	2018	MRC-IEU	Ben Elsworth	NA	Males and Females	European	5771	457239	NA	SD	41204#I251: Output from GWAS pipeline using Phesant derived variables from UKBiobank
ukb-b-16662	Diagnoses - secondary ICD10: I25.2 Old myocardial infarction	1	NA	Binary	463010	9851867	2018	MRC-IEU	Ben Elsworth	NA	Males and Females	European	3340	459670	NA	SD	41204#I252: Output from GWAS pipeline using Phesant derived variables from UKBiobank
ukb-b-16606	Diagnoses - secondary ICD10: I25.8 Other forms of chronic ischaemic heart disease	1	NA	Binary	463010	9851867	2018	MRC-IEU	Ben Elsworth	NA	Males and Females	European	5738	457272	NA	SD	41204#I258: Output from GWAS pipeline using Phesant derived variables from UKBiobank
ukb-b-8184	Diagnoses - secondary ICD10: I25.9 Chronic ischaemic heart disease, unspecified	1	NA	Binary	463010	9851867	2018	MRC-IEU	Ben Elsworth	NA	Males and Females	European	5861	457149	NA	SD	41204#I259: Output from GWAS pipeline using Phesant derived variables from UKBiobank
ukb-b-13525	Diagnoses - secondary ICD10: I34.0 Mitral (valve) insufficiency	1	NA	Binary	463010	9851867	2018	MRC-IEU	Ben Elsworth	NA	Males and Females	European	1021	461989	NA	SD	41204#I340: Output from GWAS pipeline using Phesant derived variables from UKBiobank
ukb-b-6217	Diagnoses - secondary ICD10: I48 Atrial fibrillation and flutter	1	NA	Binary	463010	9851867	2018	MRC-IEU	Ben Elsworth	NA	Males and Females	European	6900	456110	NA	SD	41204#I48: Output from GWAS pipeline using Phesant derived variables from UKBiobank
ukb-b-10555	Diagnoses - secondary ICD10: I50.1 Left ventricular failure	1	NA	Binary	463010	9851867	2018	MRC-IEU	Ben Elsworth	NA	Males and Females	European	2046	460964	NA	SD	41204#I501: Output from GWAS pipeline using Phesant derived variables from UKBiobank
ukb-b-16292	Diagnoses - secondary ICD10: I51.7 Cardiomegaly	1	NA	Binary	463010	9851867	2018	MRC-IEU	Ben Elsworth	NA	Males and Females	European	1326	461684	NA	SD	41204#I517: Output from GWAS pipeline using Phesant derived variables from UKBiobank
ukb-b-4929	Diagnoses - secondary ICD10: I73.9 Peripheral vascular disease, unspecified	1	NA	Binary	463010	9851867	2018	MRC-IEU	Ben Elsworth	NA	Males and Females	European	1456	461554	NA	SD	41204#I739: Output from GWAS pipeline using Phesant derived variables from UKBiobank
ukb-b-1259	Diagnoses - secondary ICD10: I84.2 Internal haemorrhoids without complication	1	NA	Binary	463010	9851867	2018	MRC-IEU	Ben Elsworth	NA	Males and Females	European	1229	461781	NA	SD	41204#I842: Output from GWAS pipeline using Phesant derived variables from UKBiobank
ukb-b-1228	Diagnoses - secondary ICD10: I84.6 Residual haemorrhoidal skin tags	1	NA	Binary	463010	9851867	2018	MRC-IEU	Ben Elsworth	NA	Males and Females	European	1710	461300	NA	SD	41204#I846: Output from GWAS pipeline using Phesant derived variables from UKBiobank
ukb-b-4476	Diagnoses - secondary ICD10: I84.9 Unspecified haemorrhoids without complication	1	NA	Binary	463010	9851867	2018	MRC-IEU	Ben Elsworth	NA	Males and Females	European	4508	458502	NA	SD	41204#I849: Output from GWAS pipeline using Phesant derived variables from UKBiobank
ukb-b-8855	Diagnoses - secondary ICD10: I95.9 Hypotension, unspecified	1	NA	Binary	463010	9851867	2018	MRC-IEU	Ben Elsworth	NA	Males and Females	European	1666	461344	NA	SD	41204#I959: Output from GWAS pipeline using Phesant derived variables from UKBiobank
ukb-b-1761	Diagnoses - secondary ICD10: J18.1 Lobar pneumonia, unspecified	1	NA	Binary	463010	9851867	2018	MRC-IEU	Ben Elsworth	NA	Males and Females	European	1045	461965	NA	SD	41204#J181: Output from GWAS pipeline using Phesant derived variables from UKBiobank
ukb-b-9369	Diagnoses - secondary ICD10: J22 Unspecified acute lower respiratory infection	1	NA	Binary	463010	9851867	2018	MRC-IEU	Ben Elsworth	NA	Males and Females	European	2514	460496	NA	SD	41204#J22: Output from GWAS pipeline using Phesant derived variables from UKBiobank
ukb-b-5815	Diagnoses - secondary ICD10: J34.3 Hypertrophy of nasal turbinates	1	NA	Binary	463010	9851867	2018	MRC-IEU	Ben Elsworth	NA	Males and Females	European	1208	461802	NA	SD	41204#J343: Output from GWAS pipeline using Phesant derived variables from UKBiobank
ukb-b-16751	Diagnoses - secondary ICD10: J44.9 Chronic obstructive pulmonary disease, unspecified	1	NA	Binary	463010	9851867	2018	MRC-IEU	Ben Elsworth	NA	Males and Females	European	3871	459139	NA	SD	41204#J449: Output from GWAS pipeline using Phesant derived variables from UKBiobank
ukb-b-17219	Diagnoses - secondary ICD10: J45.9 Asthma, unspecified	1	NA	Binary	463010	9851867	2018	MRC-IEU	Ben Elsworth	NA	Males and Females	European	18988	444022	NA	SD	41204#J459: Output from GWAS pipeline using Phesant derived variables from UKBiobank
ukb-b-9925	Diagnoses - secondary ICD10: J90 Pleural effusion, not elsewhere classified	1	NA	Binary	463010	9851867	2018	MRC-IEU	Ben Elsworth	NA	Males and Females	European	2411	460599	NA	SD	41204#J90: Output from GWAS pipeline using Phesant derived variables from UKBiobank
ukb-b-16209	Diagnoses - secondary ICD10: K20 Oesophagitis	1	NA	Binary	463010	9851867	2018	MRC-IEU	Ben Elsworth	NA	Males and Females	European	2689	460321	NA	SD	41204#K20: Output from GWAS pipeline using Phesant derived variables from UKBiobank
ukb-b-10144	Diagnoses - secondary ICD10: K21.0 Gastro-oesophageal reflux disease with oesophagitis	1	NA	Binary	463010	9851867	2018	MRC-IEU	Ben Elsworth	NA	Males and Females	European	2241	460769	NA	SD	41204#K210: Output from GWAS pipeline using Phesant derived variables from UKBiobank
ukb-b-19886	Diagnoses - secondary ICD10: K21.9 Gastro-oesophageal reflux disease without oesophagitis	1	NA	Binary	463010	9851867	2018	MRC-IEU	Ben Elsworth	NA	Males and Females	European	4360	458650	NA	SD	41204#K219: Output from GWAS pipeline using Phesant derived variables from UKBiobank
ukb-b-9368	Diagnoses - secondary ICD10: K22.1 Ulcer of oesophagus	1	NA	Binary	463010	9851867	2018	MRC-IEU	Ben Elsworth	NA	Males and Females	European	2245	460765	NA	SD	41204#K221: Output from GWAS pipeline using Phesant derived variables from UKBiobank
ukb-b-12202	Diagnoses - secondary ICD10: K25.9 Unspecified as acute or chronic, without haemorrhage or perforation	1	NA	Binary	463010	9851867	2018	MRC-IEU	Ben Elsworth	NA	Males and Females	European	1355	461655	NA	SD	41204#K259: Output from GWAS pipeline using Phesant derived variables from UKBiobank
ukb-b-6616	Diagnoses - secondary ICD10: K26.9 Unspecified as acute or chronic, without haemorrhage or perforation	1	NA	Binary	463010	9851867	2018	MRC-IEU	Ben Elsworth	NA	Males and Females	European	1031	461979	NA	SD	41204#K269: Output from GWAS pipeline using Phesant derived variables from UKBiobank
ukb-b-12191	Diagnoses - secondary ICD10: K29.5 Chronic gastritis, unspecified	1	NA	Binary	463010	9851867	2018	MRC-IEU	Ben Elsworth	NA	Males and Females	European	1062	461948	NA	SD	41204#K295: Output from GWAS pipeline using Phesant derived variables from UKBiobank
ukb-b-18102	Diagnoses - secondary ICD10: K29.6 Other gastritis	1	NA	Binary	463010	9851867	2018	MRC-IEU	Ben Elsworth	NA	Males and Females	European	1756	461254	NA	SD	41204#K296: Output from GWAS pipeline using Phesant derived variables from UKBiobank
ukb-b-15340	Diagnoses - secondary ICD10: K29.7 Gastritis, unspecified	1	NA	Binary	463010	9851867	2018	MRC-IEU	Ben Elsworth	NA	Males and Females	European	5718	457292	NA	SD	41204#K297: Output from GWAS pipeline using Phesant derived variables from UKBiobank
ukb-b-20017	Diagnoses - secondary ICD10: K29.8 Duodenitis	1	NA	Binary	463010	9851867	2018	MRC-IEU	Ben Elsworth	NA	Males and Females	European	4640	458370	NA	SD	41204#K298: Output from GWAS pipeline using Phesant derived variables from UKBiobank
ukb-b-12556	Diagnoses - secondary ICD10: K30 Dyspepsia	1	NA	Binary	463010	9851867	2018	MRC-IEU	Ben Elsworth	NA	Males and Females	European	2024	460986	NA	SD	41204#K30: Output from GWAS pipeline using Phesant derived variables from UKBiobank
ukb-b-3027	Diagnoses - secondary ICD10: K31.7 Polyp of stomach and duodenum	1	NA	Binary	463010	9851867	2018	MRC-IEU	Ben Elsworth	NA	Males and Females	European	1233	461777	NA	SD	41204#K317: Output from GWAS pipeline using Phesant derived variables from UKBiobank
ukb-b-2973	Diagnoses - secondary ICD10: K31.8 Other specified diseases of stomach and duodenum	1	NA	Binary	463010	9851867	2018	MRC-IEU	Ben Elsworth	NA	Males and Females	European	1247	461763	NA	SD	41204#K318: Output from GWAS pipeline using Phesant derived variables from UKBiobank
ukb-b-3672	Diagnoses - secondary ICD10: K44.9 Diaphragmatic hernia without obstruction or gangrene	1	NA	Binary	463010	9851867	2018	MRC-IEU	Ben Elsworth	NA	Males and Females	European	14326	448684	NA	SD	41204#K449: Output from GWAS pipeline using Phesant derived variables from UKBiobank
ukb-b-7421	Diagnoses - secondary ICD10: K51.9 Ulcerative colitis, unspecified	1	NA	Binary	463010	9851867	2018	MRC-IEU	Ben Elsworth	NA	Males and Females	European	1268	461742	NA	SD	41204#K519: Output from GWAS pipeline using Phesant derived variables from UKBiobank
ukb-b-4824	Diagnoses - secondary ICD10: K52.9 Non-infective gastro-enteritis and colitis, unspecified	1	NA	Binary	463010	9851867	2018	MRC-IEU	Ben Elsworth	NA	Males and Females	European	5703	457307	NA	SD	41204#K529: Output from GWAS pipeline using Phesant derived variables from UKBiobank
ukb-b-13392	Diagnoses - secondary ICD10: K57.3 Diverticular disease of large intestine without perforation or abscess	1	NA	Binary	463010	9851867	2018	MRC-IEU	Ben Elsworth	NA	Males and Females	European	7137	455873	NA	SD	41204#K573: Output from GWAS pipeline using Phesant derived variables from UKBiobank
ukb-b-14429	Diagnoses - secondary ICD10: K57.9 Diverticular disease of intestine, part unspecified, without perforation or abscess	1	NA	Binary	463010	9851867	2018	MRC-IEU	Ben Elsworth	NA	Males and Females	European	2622	460388	NA	SD	41204#K579: Output from GWAS pipeline using Phesant derived variables from UKBiobank
ukb-b-707	Diagnoses - secondary ICD10: K58.9 Irritable bowel syndrome without diarrhoea	1	NA	Binary	463010	9851867	2018	MRC-IEU	Ben Elsworth	NA	Males and Females	European	2760	460250	NA	SD	41204#K589: Output from GWAS pipeline using Phesant derived variables from UKBiobank
ukb-b-18008	Diagnoses - secondary ICD10: K59.0 Constipation	1	NA	Binary	463010	9851867	2018	MRC-IEU	Ben Elsworth	NA	Males and Females	European	3862	459148	NA	SD	41204#K590: Output from GWAS pipeline using Phesant derived variables from UKBiobank
ukb-b-8348	Diagnoses - secondary ICD10: K62.1 Rectal polyp	1	NA	Binary	463010	9851867	2018	MRC-IEU	Ben Elsworth	NA	Males and Females	European	1837	461173	NA	SD	41204#K621: Output from GWAS pipeline using Phesant derived variables from UKBiobank
ukb-b-6824	Diagnoses - secondary ICD10: K62.5 Haemorrhage of anus and rectum	1	NA	Binary	463010	9851867	2018	MRC-IEU	Ben Elsworth	NA	Males and Females	European	3642	459368	NA	SD	41204#K625: Output from GWAS pipeline using Phesant derived variables from UKBiobank
ukb-b-17845	Diagnoses - secondary ICD10: K63.5 Polyp of colon	1	NA	Binary	463010	9851867	2018	MRC-IEU	Ben Elsworth	NA	Males and Females	European	2437	460573	NA	SD	41204#K635: Output from GWAS pipeline using Phesant derived variables from UKBiobank
ukb-b-11675	Diagnoses - secondary ICD10: K66.0 Peritoneal adhesions	1	NA	Binary	463010	9851867	2018	MRC-IEU	Ben Elsworth	NA	Males and Females	European	1457	461553	NA	SD	41204#K660: Output from GWAS pipeline using Phesant derived variables from UKBiobank
ukb-b-4303	Diagnoses - secondary ICD10: K80.2 Calculus of gallbladder without cholecystitis	1	NA	Binary	463010	9851867	2018	MRC-IEU	Ben Elsworth	NA	Males and Females	European	2091	460919	NA	SD	41204#K802: Output from GWAS pipeline using Phesant derived variables from UKBiobank
ukb-b-5251	Diagnoses - secondary ICD10: L03.1 Cellulitis of other parts of limb	1	NA	Binary	463010	9851867	2018	MRC-IEU	Ben Elsworth	NA	Males and Females	European	1195	461815	NA	SD	41204#L031: Output from GWAS pipeline using Phesant derived variables from UKBiobank
ukb-b-11874	Diagnoses - secondary ICD10: M06.99 Rheumatoid arthritis, unspecified (Site unspecified)	1	NA	Binary	463010	9851867	2018	MRC-IEU	Ben Elsworth	NA	Males and Females	European	1523	461487	NA	SD	41204#M0699: Output from GWAS pipeline using Phesant derived variables from UKBiobank
ukb-b-12765	Diagnoses - secondary ICD10: M10.99 Gout, unspecified (Site unspecified)	1	NA	Binary	463010	9851867	2018	MRC-IEU	Ben Elsworth	NA	Males and Females	European	1042	461968	NA	SD	41204#M1099: Output from GWAS pipeline using Phesant derived variables from UKBiobank
ukb-b-11045	Diagnoses - secondary ICD10: M13.9 Arthritis, unspecified	1	NA	Binary	463010	9851867	2018	MRC-IEU	Ben Elsworth	NA	Males and Females	European	1477	461533	NA	SD	41204#M139: Output from GWAS pipeline using Phesant derived variables from UKBiobank
ukb-b-15026	Diagnoses - secondary ICD10: M13.99 Arthritis, unspecified (Site unspecified)	1	NA	Binary	463010	9851867	2018	MRC-IEU	Ben Elsworth	NA	Males and Females	European	2785	460225	NA	SD	41204#M1399: Output from GWAS pipeline using Phesant derived variables from UKBiobank
ukb-b-6998	Diagnoses - secondary ICD10: M15.9 Polyarthrosis, unspecified	1	NA	Binary	463010	9851867	2018	MRC-IEU	Ben Elsworth	NA	Males and Females	European	1165	461845	NA	SD	41204#M159: Output from GWAS pipeline using Phesant derived variables from UKBiobank
ukb-b-12964	Diagnoses - secondary ICD10: M17.1 Other primary gonarthrosis	1	NA	Binary	463010	9851867	2018	MRC-IEU	Ben Elsworth	NA	Males and Females	European	1492	461518	NA	SD	41204#M171: Output from GWAS pipeline using Phesant derived variables from UKBiobank
ukb-b-20414	Diagnoses - secondary ICD10: M17.9 Gonarthrosis, unspecified	1	NA	Binary	463010	9851867	2018	MRC-IEU	Ben Elsworth	NA	Males and Females	European	4233	458777	NA	SD	41204#M179: Output from GWAS pipeline using Phesant derived variables from UKBiobank
ukb-b-9493	Diagnoses - secondary ICD10: M19.9 Arthrosis, unspecified	1	NA	Binary	463010	9851867	2018	MRC-IEU	Ben Elsworth	NA	Males and Females	European	1797	461213	NA	SD	41204#M199: Output from GWAS pipeline using Phesant derived variables from UKBiobank
ukb-b-20233	Diagnoses - secondary ICD10: M19.99 Arthrosis, unspecified (Site unspecified)	1	NA	Binary	463010	9851867	2018	MRC-IEU	Ben Elsworth	NA	Males and Females	European	2905	460105	NA	SD	41204#M1999: Output from GWAS pipeline using Phesant derived variables from UKBiobank
ukb-b-2625	Diagnoses - secondary ICD10: M47.82 Other spondylosis (Cervical region)	1	NA	Binary	463010	9851867	2018	MRC-IEU	Ben Elsworth	NA	Males and Females	European	1018	461992	NA	SD	41204#M4782: Output from GWAS pipeline using Phesant derived variables from UKBiobank
ukb-b-17796	Diagnoses - secondary ICD10: M81.99 Osteoporosis, unspecified (Site unspecified)	1	NA	Binary	463010	9851867	2018	MRC-IEU	Ben Elsworth	NA	Males and Females	European	1976	461034	NA	SD	41204#M8199: Output from GWAS pipeline using Phesant derived variables from UKBiobank
ukb-b-4963	Diagnoses - secondary ICD10: N17.9 Acute renal failure, unspecified	1	NA	Binary	463010	9851867	2018	MRC-IEU	Ben Elsworth	NA	Males and Females	European	1415	461595	NA	SD	41204#N179: Output from GWAS pipeline using Phesant derived variables from UKBiobank
ukb-b-499	Diagnoses - secondary ICD10: N32.8 Other specified disorders of bladder	1	NA	Binary	463010	9851867	2018	MRC-IEU	Ben Elsworth	NA	Males and Females	European	2684	460326	NA	SD	41204#N328: Output from GWAS pipeline using Phesant derived variables from UKBiobank
ukb-b-6077	Diagnoses - secondary ICD10: N39.0 Urinary tract infection, site not specified	1	NA	Binary	463010	9851867	2018	MRC-IEU	Ben Elsworth	NA	Males and Females	European	4180	458830	NA	SD	41204#N390: Output from GWAS pipeline using Phesant derived variables from UKBiobank
ukb-b-5266	Diagnoses - secondary ICD10: N39.3 Stress incontinence	1	NA	Binary	463010	9851867	2018	MRC-IEU	Ben Elsworth	NA	Males and Females	European	1404	461606	NA	SD	41204#N393: Output from GWAS pipeline using Phesant derived variables from UKBiobank
ukb-b-8072	Diagnoses - secondary ICD10: N40 Hyperplasia of prostate	1	NA	Binary	463010	9851867	2018	MRC-IEU	Ben Elsworth	NA	Males and Females	European	4133	458877	NA	SD	41204#N40: Output from GWAS pipeline using Phesant derived variables from UKBiobank
ukb-b-6413	Diagnoses - secondary ICD10: N73.6 Female pelvic peritoneal adhesions	1	NA	Binary	463010	9851867	2018	MRC-IEU	Ben Elsworth	NA	Males and Females	European	1790	461220	NA	SD	41204#N736: Output from GWAS pipeline using Phesant derived variables from UKBiobank
ukb-b-9668	Diagnoses - secondary ICD10: N80.0 Endometriosis of uterus	1	NA	Binary	463010	9851867	2018	MRC-IEU	Ben Elsworth	NA	Males and Females	European	1121	461889	NA	SD	41204#N800: Output from GWAS pipeline using Phesant derived variables from UKBiobank
ukb-b-17336	Diagnoses - secondary ICD10: N81.1 Cystocele	1	NA	Binary	463010	9851867	2018	MRC-IEU	Ben Elsworth	NA	Males and Females	European	1605	461405	NA	SD	41204#N811: Output from GWAS pipeline using Phesant derived variables from UKBiobank
ukb-b-2055	Diagnoses - secondary ICD10: N81.2 Incomplete uterovaginal prolapse	1	NA	Binary	463010	9851867	2018	MRC-IEU	Ben Elsworth	NA	Males and Females	European	1042	461968	NA	SD	41204#N812: Output from GWAS pipeline using Phesant derived variables from UKBiobank
ukb-b-3412	Diagnoses - secondary ICD10: N81.6 Rectocele	1	NA	Binary	463010	9851867	2018	MRC-IEU	Ben Elsworth	NA	Males and Females	European	2093	460917	NA	SD	41204#N816: Output from GWAS pipeline using Phesant derived variables from UKBiobank
ukb-b-4790	Diagnoses - secondary ICD10: N83.2 Other and unspecified ovarian cysts	1	NA	Binary	463010	9851867	2018	MRC-IEU	Ben Elsworth	NA	Males and Females	European	1656	461354	NA	SD	41204#N832: Output from GWAS pipeline using Phesant derived variables from UKBiobank
ukb-b-13998	Diagnoses - secondary ICD10: N84.0 Polyp of corpus uteri	1	NA	Binary	463010	9851867	2018	MRC-IEU	Ben Elsworth	NA	Males and Females	European	2252	460758	NA	SD	41204#N840: Output from GWAS pipeline using Phesant derived variables from UKBiobank
ukb-b-8685	Diagnoses - secondary ICD10: N85.8 Other specified noninflammatory disorders of uterus	1	NA	Binary	463010	9851867	2018	MRC-IEU	Ben Elsworth	NA	Males and Females	European	1450	461560	NA	SD	41204#N858: Output from GWAS pipeline using Phesant derived variables from UKBiobank
ukb-b-12282	Diagnoses - secondary ICD10: N92.0 Excessive and frequent menstruation with regular cycle	1	NA	Binary	463010	9851867	2018	MRC-IEU	Ben Elsworth	NA	Males and Females	European	2698	460312	NA	SD	41204#N920: Output from GWAS pipeline using Phesant derived variables from UKBiobank
ukb-b-12604	Diagnoses - secondary ICD10: N94.6 Dysmenorrhoea, unspecified	1	NA	Binary	463010	9851867	2018	MRC-IEU	Ben Elsworth	NA	Males and Females	European	1145	461865	NA	SD	41204#N946: Output from GWAS pipeline using Phesant derived variables from UKBiobank
ukb-b-16879	Diagnoses - secondary ICD10: N95.0 Postmenopausal bleeding	1	NA	Binary	463010	9851867	2018	MRC-IEU	Ben Elsworth	NA	Males and Females	European	2161	460849	NA	SD	41204#N950: Output from GWAS pipeline using Phesant derived variables from UKBiobank
ukb-b-13770	Diagnoses - secondary ICD10: O70.1 Second degree perineal laceration during delivery	1	NA	Binary	463010	9851867	2018	MRC-IEU	Ben Elsworth	NA	Males and Females	European	1446	461564	NA	SD	41204#O701: Output from GWAS pipeline using Phesant derived variables from UKBiobank
ukb-b-17309	Diagnoses - secondary ICD10: R00.0 Tachycardia, unspecified	1	NA	Binary	463010	9851867	2018	MRC-IEU	Ben Elsworth	NA	Males and Females	European	1005	462005	NA	SD	41204#R000: Output from GWAS pipeline using Phesant derived variables from UKBiobank
ukb-b-11664	Diagnoses - secondary ICD10: R00.1 Bradycardia, unspecified	1	NA	Binary	463010	9851867	2018	MRC-IEU	Ben Elsworth	NA	Males and Females	European	1254	461756	NA	SD	41204#R001: Output from GWAS pipeline using Phesant derived variables from UKBiobank
ukb-b-1480	Diagnoses - secondary ICD10: R00.2 Palpitations	1	NA	Binary	463010	9851867	2018	MRC-IEU	Ben Elsworth	NA	Males and Females	European	1380	461630	NA	SD	41204#R002: Output from GWAS pipeline using Phesant derived variables from UKBiobank
ukb-b-16587	Diagnoses - secondary ICD10: R03.0 Elevated blood-pressure reading, without diagnosis of hypertension	1	NA	Binary	463010	9851867	2018	MRC-IEU	Ben Elsworth	NA	Males and Females	European	1134	461876	NA	SD	41204#R030: Output from GWAS pipeline using Phesant derived variables from UKBiobank
ukb-b-20009	Diagnoses - secondary ICD10: R05 Cough	1	NA	Binary	463010	9851867	2018	MRC-IEU	Ben Elsworth	NA	Males and Females	European	1072	461938	NA	SD	41204#R05: Output from GWAS pipeline using Phesant derived variables from UKBiobank
ukb-b-19391	Diagnoses - secondary ICD10: R06.0 Dyspnoea	1	NA	Binary	463010	9851867	2018	MRC-IEU	Ben Elsworth	NA	Males and Females	European	2248	460762	NA	SD	41204#R060: Output from GWAS pipeline using Phesant derived variables from UKBiobank
ukb-b-18425	Diagnoses - secondary ICD10: R07.4 Chest pain, unspecified	1	NA	Binary	463010	9851867	2018	MRC-IEU	Ben Elsworth	NA	Males and Females	European	2534	460476	NA	SD	41204#R074: Output from GWAS pipeline using Phesant derived variables from UKBiobank
ukb-b-10409	Diagnoses - secondary ICD10: R10.1 Pain localised to upper abdomen	1	NA	Binary	463010	9851867	2018	MRC-IEU	Ben Elsworth	NA	Males and Females	European	1543	461467	NA	SD	41204#R101: Output from GWAS pipeline using Phesant derived variables from UKBiobank
ukb-b-8161	Diagnoses - secondary ICD10: R10.3 Pain localised to other parts of lower abdomen	1	NA	Binary	463010	9851867	2018	MRC-IEU	Ben Elsworth	NA	Males and Females	European	1659	461351	NA	SD	41204#R103: Output from GWAS pipeline using Phesant derived variables from UKBiobank
ukb-b-19409	Diagnoses - secondary ICD10: R10.4 Other and unspecified abdominal pain	1	NA	Binary	463010	9851867	2018	MRC-IEU	Ben Elsworth	NA	Males and Females	European	4649	458361	NA	SD	41204#R104: Output from GWAS pipeline using Phesant derived variables from UKBiobank
ukb-b-4554	Diagnoses - secondary ICD10: R11 Nausea and vomiting	1	NA	Binary	463010	9851867	2018	MRC-IEU	Ben Elsworth	NA	Males and Females	European	6773	456237	NA	SD	41204#R11: Output from GWAS pipeline using Phesant derived variables from UKBiobank
ukb-b-782	Diagnoses - secondary ICD10: R13 Dysphagia	1	NA	Binary	463010	9851867	2018	MRC-IEU	Ben Elsworth	NA	Males and Females	European	1521	461489	NA	SD	41204#R13: Output from GWAS pipeline using Phesant derived variables from UKBiobank
ukb-b-10368	Diagnoses - secondary ICD10: R19.4 Change in bowel habit	1	NA	Binary	463010	9851867	2018	MRC-IEU	Ben Elsworth	NA	Males and Females	European	2443	460567	NA	SD	41204#R194: Output from GWAS pipeline using Phesant derived variables from UKBiobank
ukb-b-6517	Diagnoses - secondary ICD10: R31 Unspecified haematuria	1	NA	Binary	463010	9851867	2018	MRC-IEU	Ben Elsworth	NA	Males and Females	European	2594	460416	NA	SD	41204#R31: Output from GWAS pipeline using Phesant derived variables from UKBiobank
ukb-b-19207	Diagnoses - secondary ICD10: R33 Retention of urine	1	NA	Binary	463010	9851867	2018	MRC-IEU	Ben Elsworth	NA	Males and Females	European	2599	460411	NA	SD	41204#R33: Output from GWAS pipeline using Phesant derived variables from UKBiobank
ukb-b-16946	Diagnoses - secondary ICD10: R35 Polyuria	1	NA	Binary	463010	9851867	2018	MRC-IEU	Ben Elsworth	NA	Males and Females	European	1446	461564	NA	SD	41204#R35: Output from GWAS pipeline using Phesant derived variables from UKBiobank
ukb-b-20542	Diagnoses - secondary ICD10: R42 Dizziness and giddiness	1	NA	Binary	463010	9851867	2018	MRC-IEU	Ben Elsworth	NA	Males and Females	European	1756	461254	NA	SD	41204#R42: Output from GWAS pipeline using Phesant derived variables from UKBiobank
ukb-b-19086	Diagnoses - secondary ICD10: R50.9 Fever, unspecified	1	NA	Binary	463010	9851867	2018	MRC-IEU	Ben Elsworth	NA	Males and Females	European	1794	461216	NA	SD	41204#R509: Output from GWAS pipeline using Phesant derived variables from UKBiobank
ukb-b-7467	Diagnoses - secondary ICD10: R51 Headache	1	NA	Binary	463010	9851867	2018	MRC-IEU	Ben Elsworth	NA	Males and Females	European	2176	460834	NA	SD	41204#R51: Output from GWAS pipeline using Phesant derived variables from UKBiobank
ukb-b-11972	Diagnoses - secondary ICD10: R53 Malaise and fatigue	1	NA	Binary	463010	9851867	2018	MRC-IEU	Ben Elsworth	NA	Males and Females	European	1245	461765	NA	SD	41204#R53: Output from GWAS pipeline using Phesant derived variables from UKBiobank
ukb-b-6441	Diagnoses - secondary ICD10: R55 Syncope and collapse	1	NA	Binary	463010	9851867	2018	MRC-IEU	Ben Elsworth	NA	Males and Females	European	2224	460786	NA	SD	41204#R55: Output from GWAS pipeline using Phesant derived variables from UKBiobank
ukb-b-13845	Diagnoses - secondary ICD10: R63.4 Abnormal weight loss	1	NA	Binary	463010	9851867	2018	MRC-IEU	Ben Elsworth	NA	Males and Females	European	2751	460259	NA	SD	41204#R634: Output from GWAS pipeline using Phesant derived variables from UKBiobank
ukb-b-1762	Diagnoses - secondary ICD10: R69 Unknown and unspecified causes of morbidity	1	NA	Binary	463010	9851867	2018	MRC-IEU	Ben Elsworth	NA	Males and Females	European	7891	455119	NA	SD	41204#R69: Output from GWAS pipeline using Phesant derived variables from UKBiobank
ukb-b-11209	Diagnoses - secondary ICD10: R79.8 Other specified abnormal findings of blood chemistry	1	NA	Binary	463010	9851867	2018	MRC-IEU	Ben Elsworth	NA	Males and Females	European	2043	460967	NA	SD	41204#R798: Output from GWAS pipeline using Phesant derived variables from UKBiobank
ukb-b-4579	Diagnoses - secondary ICD10: R94.5 Abnormal results of liver function studies	1	NA	Binary	463010	9851867	2018	MRC-IEU	Ben Elsworth	NA	Males and Females	European	1802	461208	NA	SD	41204#R945: Output from GWAS pipeline using Phesant derived variables from UKBiobank
ukb-b-5164	Diagnoses - secondary ICD10: T81.0 Haemorrhage and haematoma complicating a procedure, not elsewhere classified	1	NA	Binary	463010	9851867	2018	MRC-IEU	Ben Elsworth	NA	Males and Females	European	2424	460586	NA	SD	41204#T810: Output from GWAS pipeline using Phesant derived variables from UKBiobank
ukb-b-4586	Diagnoses - secondary ICD10: T81.4 Infection following a procedure, not elsewhere classified	1	NA	Binary	463010	9851867	2018	MRC-IEU	Ben Elsworth	NA	Males and Females	European	1506	461504	NA	SD	41204#T814: Output from GWAS pipeline using Phesant derived variables from UKBiobank
ukb-b-11065	Diagnoses - secondary ICD10: W01.0 Home	1	NA	Binary	463010	9851867	2018	MRC-IEU	Ben Elsworth	NA	Males and Females	European	1122	461888	NA	SD	41204#W010: Output from GWAS pipeline using Phesant derived variables from UKBiobank
ukb-b-12058	Diagnoses - secondary ICD10: W01.9 Unspecified place	1	NA	Binary	463010	9851867	2018	MRC-IEU	Ben Elsworth	NA	Males and Females	European	1345	461665	NA	SD	41204#W019: Output from GWAS pipeline using Phesant derived variables from UKBiobank
ukb-b-19088	Diagnoses - secondary ICD10: W10.0 Home	1	NA	Binary	463010	9851867	2018	MRC-IEU	Ben Elsworth	NA	Males and Females	European	1120	461890	NA	SD	41204#W100: Output from GWAS pipeline using Phesant derived variables from UKBiobank
ukb-b-2854	Diagnoses - secondary ICD10: W19.9 Unspecified place	1	NA	Binary	463010	9851867	2018	MRC-IEU	Ben Elsworth	NA	Males and Females	European	2506	460504	NA	SD	41204#W199: Output from GWAS pipeline using Phesant derived variables from UKBiobank
ukb-b-14257	Diagnoses - secondary ICD10: X59.9 Unspecified place	1	NA	Binary	463010	9851867	2018	MRC-IEU	Ben Elsworth	NA	Males and Females	European	3232	459778	NA	SD	41204#X599: Output from GWAS pipeline using Phesant derived variables from UKBiobank
ukb-b-4745	Diagnoses - secondary ICD10: Y43.3 Other antineoplastic drugs	1	NA	Binary	463010	9851867	2018	MRC-IEU	Ben Elsworth	NA	Males and Females	European	1101	461909	NA	SD	41204#Y433: Output from GWAS pipeline using Phesant derived variables from UKBiobank
ukb-b-13841	Diagnoses - secondary ICD10: Y83.1 Surgical operation with implant of artificial internal device	1	NA	Binary	463010	9851867	2018	MRC-IEU	Ben Elsworth	NA	Males and Females	European	4135	458875	NA	SD	41204#Y831: Output from GWAS pipeline using Phesant derived variables from UKBiobank
ukb-b-3115	Diagnoses - secondary ICD10: Y83.2 Surgical operation with anastomosis, bypass or graft	1	NA	Binary	463010	9851867	2018	MRC-IEU	Ben Elsworth	NA	Males and Females	European	1411	461599	NA	SD	41204#Y832: Output from GWAS pipeline using Phesant derived variables from UKBiobank
ukb-b-7702	Diagnoses - secondary ICD10: Y83.6 Removal of other organ (partial) (total)	1	NA	Binary	463010	9851867	2018	MRC-IEU	Ben Elsworth	NA	Males and Females	European	3054	459956	NA	SD	41204#Y836: Output from GWAS pipeline using Phesant derived variables from UKBiobank
ukb-b-17823	Diagnoses - secondary ICD10: Y83.8 Other surgical procedures	1	NA	Binary	463010	9851867	2018	MRC-IEU	Ben Elsworth	NA	Males and Females	European	4789	458221	NA	SD	41204#Y838: Output from GWAS pipeline using Phesant derived variables from UKBiobank
ukb-b-6295	Diagnoses - secondary ICD10: Z03.4 Observation for suspected myocardial infarction	1	NA	Binary	463010	9851867	2018	MRC-IEU	Ben Elsworth	NA	Males and Females	European	2559	460451	NA	SD	41204#Z034: Output from GWAS pipeline using Phesant derived variables from UKBiobank
ukb-b-10490	Diagnoses - secondary ICD10: Z03.8 Observation for other suspected diseases and conditions	1	NA	Binary	463010	9851867	2018	MRC-IEU	Ben Elsworth	NA	Males and Females	European	2219	460791	NA	SD	41204#Z038: Output from GWAS pipeline using Phesant derived variables from UKBiobank
ukb-b-5443	Diagnoses - secondary ICD10: Z13.0 Special screening examination for diseases of the blood and blood-forming organs and certain disorders involving the immune mechanism	1	NA	Binary	463010	9851867	2018	MRC-IEU	Ben Elsworth	NA	Males and Females	European	1060	461950	NA	SD	41204#Z130: Output from GWAS pipeline using Phesant derived variables from UKBiobank
ukb-b-6826	Diagnoses - secondary ICD10: Z13.8 Special screening examination for other specified diseases and disorders	1	NA	Binary	463010	9851867	2018	MRC-IEU	Ben Elsworth	NA	Males and Females	European	1044	461966	NA	SD	41204#Z138: Output from GWAS pipeline using Phesant derived variables from UKBiobank
ukb-b-4193	Diagnoses - secondary ICD10: Z37.0 Single live birth	1	NA	Binary	463010	9851867	2018	MRC-IEU	Ben Elsworth	NA	Males and Females	European	12567	450443	NA	SD	41204#Z370: Output from GWAS pipeline using Phesant derived variables from UKBiobank
ukb-b-10061	Diagnoses - secondary ICD10: Z50.1 Other physical therapy	1	NA	Binary	463010	9851867	2018	MRC-IEU	Ben Elsworth	NA	Males and Females	European	1824	461186	NA	SD	41204#Z501: Output from GWAS pipeline using Phesant derived variables from UKBiobank
ukb-b-16024	Diagnoses - secondary ICD10: Z51.0 Radiotherapy session	1	NA	Binary	463010	9851867	2018	MRC-IEU	Ben Elsworth	NA	Males and Females	European	1942	461068	NA	SD	41204#Z510: Output from GWAS pipeline using Phesant derived variables from UKBiobank
ukb-b-11484	Diagnoses - secondary ICD10: Z51.1 Chemotherapy session for neoplasm	1	NA	Binary	463010	9851867	2018	MRC-IEU	Ben Elsworth	NA	Males and Females	European	7714	455296	NA	SD	41204#Z511: Output from GWAS pipeline using Phesant derived variables from UKBiobank
ukb-b-712	Diagnoses - secondary ICD10: Z51.2 Other chemotherapy	1	NA	Binary	463010	9851867	2018	MRC-IEU	Ben Elsworth	NA	Males and Females	European	3035	459975	NA	SD	41204#Z512: Output from GWAS pipeline using Phesant derived variables from UKBiobank
ukb-b-15983	Diagnoses - secondary ICD10: Z51.5 Palliative care	1	NA	Binary	463010	9851867	2018	MRC-IEU	Ben Elsworth	NA	Males and Females	European	1231	461779	NA	SD	41204#Z515: Output from GWAS pipeline using Phesant derived variables from UKBiobank
ukb-b-9019	Diagnoses - secondary ICD10: Z53.0 Procedure not carried out because of contraindication	1	NA	Binary	463010	9851867	2018	MRC-IEU	Ben Elsworth	NA	Males and Females	European	4779	458231	NA	SD	41204#Z530: Output from GWAS pipeline using Phesant derived variables from UKBiobank
ukb-b-5045	Diagnoses - secondary ICD10: Z53.2 Procedure not carried out because of patient's decision for other and unspecified reasons	1	NA	Binary	463010	9851867	2018	MRC-IEU	Ben Elsworth	NA	Males and Females	European	1283	461727	NA	SD	41204#Z532: Output from GWAS pipeline using Phesant derived variables from UKBiobank
ukb-b-9043	Diagnoses - secondary ICD10: Z53.8 Procedure not carried out for other reasons	1	NA	Binary	463010	9851867	2018	MRC-IEU	Ben Elsworth	NA	Males and Females	European	10952	452058	NA	SD	41204#Z538: Output from GWAS pipeline using Phesant derived variables from UKBiobank
ukb-b-9216	Diagnoses - secondary ICD10: Z53.9 Procedure not carried out, unspecified reason	1	NA	Binary	463010	9851867	2018	MRC-IEU	Ben Elsworth	NA	Males and Females	European	1877	461133	NA	SD	41204#Z539: Output from GWAS pipeline using Phesant derived variables from UKBiobank
ukb-b-2895	Diagnoses - secondary ICD10: Z60.2 Living alone	1	NA	Binary	463010	9851867	2018	MRC-IEU	Ben Elsworth	NA	Males and Females	European	3497	459513	NA	SD	41204#Z602: Output from GWAS pipeline using Phesant derived variables from UKBiobank
ukb-b-5115	Diagnoses - secondary ICD10: Z72.0 Tobacco use	1	NA	Binary	463010	9851867	2018	MRC-IEU	Ben Elsworth	NA	Males and Females	European	13421	449589	NA	SD	41204#Z720: Output from GWAS pipeline using Phesant derived variables from UKBiobank
ukb-b-391	Diagnoses - secondary ICD10: Z72.1 Alcohol use	1	NA	Binary	463010	9851867	2018	MRC-IEU	Ben Elsworth	NA	Males and Females	European	3685	459325	NA	SD	41204#Z721: Output from GWAS pipeline using Phesant derived variables from UKBiobank
ukb-b-13247	Diagnoses - secondary ICD10: Z80.0 Family history of malignant neoplasm of digestive organs	1	NA	Binary	463010	9851867	2018	MRC-IEU	Ben Elsworth	NA	Males and Females	European	5989	457021	NA	SD	41204#Z800: Output from GWAS pipeline using Phesant derived variables from UKBiobank
ukb-b-7643	Diagnoses - secondary ICD10: Z80.3 Family history of malignant neoplasm of breast	1	NA	Binary	463010	9851867	2018	MRC-IEU	Ben Elsworth	NA	Males and Females	European	1091	461919	NA	SD	41204#Z803: Output from GWAS pipeline using Phesant derived variables from UKBiobank
ukb-b-2205	Diagnoses - secondary ICD10: Z82.4 Family history of ischaemic heart disease and other diseases of the circulatory system	1	NA	Binary	463010	9851867	2018	MRC-IEU	Ben Elsworth	NA	Males and Females	European	9330	453680	NA	SD	41204#Z824: Output from GWAS pipeline using Phesant derived variables from UKBiobank
ukb-b-16471	Diagnoses - secondary ICD10: Z85.0 Personal history of malignant neoplasm of digestive organs	1	NA	Binary	463010	9851867	2018	MRC-IEU	Ben Elsworth	NA	Males and Females	European	3570	459440	NA	SD	41204#Z850: Output from GWAS pipeline using Phesant derived variables from UKBiobank
ukb-b-20142	Diagnoses - secondary ICD10: Z85.3 Personal history of malignant neoplasm of breast	1	NA	Binary	463010	9851867	2018	MRC-IEU	Ben Elsworth	NA	Males and Females	European	5208	457802	NA	SD	41204#Z853: Output from GWAS pipeline using Phesant derived variables from UKBiobank
ukb-b-11709	Diagnoses - secondary ICD10: Z85.4 Personal history of malignant neoplasm of genital organs	1	NA	Binary	463010	9851867	2018	MRC-IEU	Ben Elsworth	NA	Males and Females	European	2692	460318	NA	SD	41204#Z854: Output from GWAS pipeline using Phesant derived variables from UKBiobank
ukb-b-7299	Diagnoses - secondary ICD10: Z85.5 Personal history of malignant neoplasm of urinary tract	1	NA	Binary	463010	9851867	2018	MRC-IEU	Ben Elsworth	NA	Males and Females	European	2117	460893	NA	SD	41204#Z855: Output from GWAS pipeline using Phesant derived variables from UKBiobank
ukb-b-11231	Diagnoses - secondary ICD10: Z85.8 Personal history of malignant neoplasms of other organs and systems	1	NA	Binary	463010	9851867	2018	MRC-IEU	Ben Elsworth	NA	Males and Females	European	3509	459501	NA	SD	41204#Z858: Output from GWAS pipeline using Phesant derived variables from UKBiobank
ukb-b-3897	Diagnoses - secondary ICD10: Z86.0 Personal history of other neoplasms	1	NA	Binary	463010	9851867	2018	MRC-IEU	Ben Elsworth	NA	Males and Females	European	4011	458999	NA	SD	41204#Z860: Output from GWAS pipeline using Phesant derived variables from UKBiobank
ukb-b-19864	Diagnoses - secondary ICD10: Z86.1 Personal history of infectious and parasitic diseases	1	NA	Binary	463010	9851867	2018	MRC-IEU	Ben Elsworth	NA	Males and Females	European	1375	461635	NA	SD	41204#Z861: Output from GWAS pipeline using Phesant derived variables from UKBiobank
ukb-b-1585	Diagnoses - secondary ICD10: Z86.4 Personal history of psychoactive substance abuse	1	NA	Binary	463010	9851867	2018	MRC-IEU	Ben Elsworth	NA	Males and Females	European	11793	451217	NA	SD	41204#Z864: Output from GWAS pipeline using Phesant derived variables from UKBiobank
ukb-b-546	Diagnoses - secondary ICD10: Z86.6 Personal history of diseases of the nervous system and sense organs	1	NA	Binary	463010	9851867	2018	MRC-IEU	Ben Elsworth	NA	Males and Females	European	3119	459891	NA	SD	41204#Z866: Output from GWAS pipeline using Phesant derived variables from UKBiobank
ukb-b-13782	Diagnoses - secondary ICD10: Z86.7 Personal history of diseases of the circulatory system	1	NA	Binary	463010	9851867	2018	MRC-IEU	Ben Elsworth	NA	Males and Females	European	10173	452837	NA	SD	41204#Z867: Output from GWAS pipeline using Phesant derived variables from UKBiobank
ukb-b-16364	Diagnoses - secondary ICD10: Z87.1 Personal history of diseases of the digestive system	1	NA	Binary	463010	9851867	2018	MRC-IEU	Ben Elsworth	NA	Males and Females	European	10458	452552	NA	SD	41204#Z871: Output from GWAS pipeline using Phesant derived variables from UKBiobank
ukb-b-18023	Diagnoses - secondary ICD10: Z87.3 Personal history of diseases of the musculoskeletal system and connective tissue	1	NA	Binary	463010	9851867	2018	MRC-IEU	Ben Elsworth	NA	Males and Females	European	1285	461725	NA	SD	41204#Z873: Output from GWAS pipeline using Phesant derived variables from UKBiobank
ukb-b-10880	Diagnoses - secondary ICD10: Z87.4 Personal history of diseases of the genito-urinary system	1	NA	Binary	463010	9851867	2018	MRC-IEU	Ben Elsworth	NA	Males and Females	European	4538	458472	NA	SD	41204#Z874: Output from GWAS pipeline using Phesant derived variables from UKBiobank
ukb-b-5911	Diagnoses - secondary ICD10: Z88.0 Personal history of allergy to penicillin	1	NA	Binary	463010	9851867	2018	MRC-IEU	Ben Elsworth	NA	Males and Females	European	11348	451662	NA	SD	41204#Z880: Output from GWAS pipeline using Phesant derived variables from UKBiobank
ukb-b-9841	Diagnoses - secondary ICD10: Z88.1 Personal history of allergy to other antibiotic agents	1	NA	Binary	463010	9851867	2018	MRC-IEU	Ben Elsworth	NA	Males and Females	European	2150	460860	NA	SD	41204#Z881: Output from GWAS pipeline using Phesant derived variables from UKBiobank
ukb-b-4267	Diagnoses - secondary ICD10: Z88.6 Personal history of allergy to analgesic agent	1	NA	Binary	463010	9851867	2018	MRC-IEU	Ben Elsworth	NA	Males and Females	European	2685	460325	NA	SD	41204#Z886: Output from GWAS pipeline using Phesant derived variables from UKBiobank
ukb-b-4601	Diagnoses - secondary ICD10: Z88.8 Personal history of allergy to other drugs, medicaments and biological substances	1	NA	Binary	463010	9851867	2018	MRC-IEU	Ben Elsworth	NA	Males and Females	European	2694	460316	NA	SD	41204#Z888: Output from GWAS pipeline using Phesant derived variables from UKBiobank
ukb-b-16641	Diagnoses - secondary ICD10: Z90.1 Acquired absence of breast(s)	1	NA	Binary	463010	9851867	2018	MRC-IEU	Ben Elsworth	NA	Males and Females	European	1661	461349	NA	SD	41204#Z901: Output from GWAS pipeline using Phesant derived variables from UKBiobank
ukb-b-14829	Diagnoses - secondary ICD10: Z90.4 Acquired absence of other parts of digestive tract	1	NA	Binary	463010	9851867	2018	MRC-IEU	Ben Elsworth	NA	Males and Females	European	3438	459572	NA	SD	41204#Z904: Output from GWAS pipeline using Phesant derived variables from UKBiobank
ukb-b-20424	Diagnoses - secondary ICD10: Z90.7 Acquired absence of genital organ(s)	1	NA	Binary	463010	9851867	2018	MRC-IEU	Ben Elsworth	NA	Males and Females	European	3446	459564	NA	SD	41204#Z907: Output from GWAS pipeline using Phesant derived variables from UKBiobank
ukb-b-16702	Diagnoses - secondary ICD10: Z91.0 Personal history of allergy, other than to drugs and biological substances	1	NA	Binary	463010	9851867	2018	MRC-IEU	Ben Elsworth	NA	Males and Females	European	1658	461352	NA	SD	41204#Z910: Output from GWAS pipeline using Phesant derived variables from UKBiobank
ukb-b-7352	Diagnoses - secondary ICD10: Z92.1 Personal history of long-term (current) use of anticoagulants	1	NA	Binary	463010	9851867	2018	MRC-IEU	Ben Elsworth	NA	Males and Females	European	5254	457756	NA	SD	41204#Z921: Output from GWAS pipeline using Phesant derived variables from UKBiobank
ukb-b-10911	Diagnoses - secondary ICD10: Z92.2 Personal history of long-term (current) use of other medicaments	1	NA	Binary	463010	9851867	2018	MRC-IEU	Ben Elsworth	NA	Males and Females	European	7915	455095	NA	SD	41204#Z922: Output from GWAS pipeline using Phesant derived variables from UKBiobank
ukb-b-14446	Diagnoses - secondary ICD10: Z92.3 Personal history of irradiation	1	NA	Binary	463010	9851867	2018	MRC-IEU	Ben Elsworth	NA	Males and Females	European	1124	461886	NA	SD	41204#Z923: Output from GWAS pipeline using Phesant derived variables from UKBiobank
ukb-b-8092	Diagnoses - secondary ICD10: Z92.4 Personal history of major surgery, not elsewhere classified	1	NA	Binary	463010	9851867	2018	MRC-IEU	Ben Elsworth	NA	Males and Females	European	1039	461971	NA	SD	41204#Z924: Output from GWAS pipeline using Phesant derived variables from UKBiobank
ukb-b-16967	Diagnoses - secondary ICD10: Z95.0 Presence of cardiac pacemaker	1	NA	Binary	463010	9851867	2018	MRC-IEU	Ben Elsworth	NA	Males and Females	European	1266	461744	NA	SD	41204#Z950: Output from GWAS pipeline using Phesant derived variables from UKBiobank
ukb-b-11064	Diagnoses - secondary ICD10: Z95.1 Presence of aortocoronary bypass graft	1	NA	Binary	463010	9851867	2018	MRC-IEU	Ben Elsworth	NA	Males and Females	European	3358	459652	NA	SD	41204#Z951: Output from GWAS pipeline using Phesant derived variables from UKBiobank
ukb-b-15748	Diagnoses - secondary ICD10: Z95.5 Presence of coronary angioplasty implant and graft	1	NA	Binary	463010	9851867	2018	MRC-IEU	Ben Elsworth	NA	Males and Females	European	3724	459286	NA	SD	41204#Z955: Output from GWAS pipeline using Phesant derived variables from UKBiobank
ukb-b-15230	Diagnoses - secondary ICD10: Z95.8 Presence of other cardiac and vascular implants and grafts	1	NA	Binary	463010	9851867	2018	MRC-IEU	Ben Elsworth	NA	Males and Females	European	1034	461976	NA	SD	41204#Z958: Output from GWAS pipeline using Phesant derived variables from UKBiobank
ukb-b-11639	Diagnoses - secondary ICD10: Z96.1 Presence of intraocular lens	1	NA	Binary	463010	9851867	2018	MRC-IEU	Ben Elsworth	NA	Males and Females	European	2240	460770	NA	SD	41204#Z961: Output from GWAS pipeline using Phesant derived variables from UKBiobank
ukb-b-20477	Diagnoses - secondary ICD10: Z96.6 Presence of orthopaedic joint implants	1	NA	Binary	463010	9851867	2018	MRC-IEU	Ben Elsworth	NA	Males and Females	European	5687	457323	NA	SD	41204#Z966: Output from GWAS pipeline using Phesant derived variables from UKBiobank
ukb-b-2630	Diagnoses - secondary ICD10: Z98.0 Intestinal bypass and anastomosis status	1	NA	Binary	463010	9851867	2018	MRC-IEU	Ben Elsworth	NA	Males and Females	European	1178	461832	NA	SD	41204#Z980: Output from GWAS pipeline using Phesant derived variables from UKBiobank
finn-a-ILD_FOR_EXCL	Diagnoses used for exclusion with ILD	0	NA	Binary	94036	16152119	2020	NA	NA	NA	Males and Females	European	1506	94993	NA	NA	NA
finn-a-DIALYSIS	Dialysis	0	NA	Binary	94036	16152119	2020	NA	NA	NA	Males and Females	European	252	94872	NA	NA	NA
finn-a-N14_DIALYSIS	Dialysis	0	NA	Binary	94036	16152119	2020	NA	NA	NA	Males and Females	European	136	94913	NA	NA	NA
finn-a-K11_DIAHER	Diaphragmatic hernia	0	NA	Binary	94036	16152119	2020	NA	NA	NA	Males and Females	European	2007	85350	NA	NA	NA
ukb-d-20532	Did your sleep change?	0	NA	Binary	57086	13557165	2018	NA	Neale lab	NA	Males and Females	European	45540	11546	NA	NA	NA
ukb-d-20435	Difficulty concentrating during worst depression	0	NA	Binary	58750	13558430	2018	NA	Neale lab	NA	Males and Females	European	46278	12472	NA	NA	NA
ukb-d-20419	Difficulty concentrating during worst period of anxiety	0	NA	Binary	34879	13541981	2018	NA	Neale lab	NA	Males and Females	European	26400	8479	NA	NA	NA
ukb-d-20541	Difficulty stopping worrying during worst period of anxiety	0	NA	Binary	35523	13542676	2018	NA	Neale lab	NA	Males and Females	European	33466	2057	NA	NA	NA
finn-a-G6_DIFBRAININJ	Diffuse brain injury	0	NA	Binary	94036	16152119	2020	NA	NA	NA	Males and Females	European	261	91328	NA	NA	NA
finn-a-DPP4INH	Dipeptidyl peptidase 4 (DPP-4) inhibitors	0	NA	Binary	94036	16152119	2020	NA	NA	NA	Males and Females	European	717	85744	NA	NA	NA
finn-a-H7_DIPLOPIA	Diplopia	0	NA	Binary	94036	16152119	2020	NA	NA	NA	Males and Females	European	598	93878	NA	NA	NA
ukb-d-K11_APPENDIX	Diseases of appendix	0	NA	Binary	361194	11121577	2018	NA	Neale lab	NA	Males and Females	European	2953	358241	NA	NA	NA
finn-a-K11_APPENDIX	Diseases of appendix	0	NA	Binary	94036	16152119	2020	NA	NA	NA	Males and Females	European	7300	89199	NA	NA	NA
finn-a-I9_DOAAC	Diseases of arteries, arterioles and capillaries	0	NA	Binary	94036	16152119	2020	NA	NA	NA	Males and Females	European	4150	92349	NA	NA	NA
finn-a-FG_DOAAC	Diseases of arteries, arterioles and capillaries (FINNGEN)	0	NA	Binary	94036	16152119	2020	NA	NA	NA	Males and Females	European	3088	56378	NA	NA	NA
finn-a-H8_EXTERNAL	Diseases of external ear	0	NA	Binary	94036	16152119	2020	NA	NA	NA	Males and Females	European	1717	94782	NA	NA	NA
finn-a-H8_INNER	Diseases of inner ear	0	NA	Binary	94036	16152119	2020	NA	NA	NA	Males and Females	European	3633	92866	NA	NA	NA
ukb-d-K11_LIVER	Diseases of liver	0	NA	Binary	361194	10138608	2018	NA	Neale lab	NA	Males and Females	European	1663	359531	NA	NA	NA
finn-a-K11_LIVER	Diseases of liver	0	NA	Binary	94036	16152119	2020	NA	NA	NA	Males and Females	European	1814	94685	NA	NA	NA
finn-a-N14_MALEGEN	Diseases of male genital organs	0	NA	Binary	94036	16152119	2020	NA	NA	NA	Males and Females	European	8456	33781	NA	NA	NA
finn-a-H8_MIDDLEMASTOID	Diseases of middle ear and mastoid	0	NA	Binary	94036	16152119	2020	NA	NA	NA	Males and Females	European	4191	92308	NA	NA	NA
finn-a-K11_OESSTODUO	Diseases of oesophagus, stomach and duodenum	0	NA	Binary	94036	16152119	2020	NA	NA	NA	Males and Females	European	11339	85160	NA	NA	NA
finn-a-K11_PERITON	Diseases of peritoneum	0	NA	Binary	94036	16152119	2020	NA	NA	NA	Males and Females	European	611	95888	NA	NA	NA
finn-a-III_BLOOD_IMMUN	Diseases of the blood and blood-forming organs and certain disorders involving the immune mechanism	0	NA	Binary	94036	16152119	2020	NA	NA	NA	Males and Females	European	6468	90031	NA	NA	NA
ukb-d-III_BLOOD_IMMUN	Diseases of the blood and blood-forming organs and certain disorders involving the immune mechanism	0	NA	Binary	361194	13284312	2018	NA	Neale lab	NA	Males and Females	European	10095	351099	NA	NA	NA
finn-a-D3_BLOOD	Diseases of the blood and blood-forming organs and certain disorders involving the immune mechanism	0	NA	Binary	94036	16152119	2020	NA	NA	NA	Males and Females	European	6649	89850	NA	NA	NA
finn-a-IX_CIRCULATORY	Diseases of the circulatory system	0	NA	Binary	94036	16152119	2020	NA	NA	NA	Males and Females	European	39827	56672	NA	NA	NA
ukb-d-IX_CIRCULATORY	Diseases of the circulatory system	0	NA	Binary	361194	13586589	2018	NA	Neale lab	NA	Males and Females	European	60504	300690	NA	NA	NA
ukb-d-XI_DIGESTIVE	Diseases of the digestive system	0	NA	Binary	361194	13586589	2018	NA	Neale lab	NA	Males and Females	European	115893	245301	NA	NA	NA
finn-a-XI_DIGESTIVE	Diseases of the digestive system	0	NA	Binary	94036	16152119	2020	NA	NA	NA	Males and Females	European	43671	52828	NA	NA	NA
finn-a-H8_EAR	Diseases of the ear and mastoid process	0	NA	Binary	94036	16152119	2020	NA	NA	NA	Males and Females	European	15329	81170	NA	NA	NA
ukb-d-VIII_EAR_MASTOID	Diseases of the ear and mastoid process	0	NA	Binary	361194	12127414	2018	NA	Neale lab	NA	Males and Females	European	5252	355942	NA	NA	NA
finn-a-VIII_EAR_MASTOID	Diseases of the ear and mastoid process	0	NA	Binary	94036	16152119	2020	NA	NA	NA	Males and Females	European	15721	80778	NA	NA	NA
finn-a-VII_EYE_ADNEXA	Diseases of the eye and adnexa	0	NA	Binary	94036	16152119	2020	NA	NA	NA	Males and Females	European	27078	69421	NA	NA	NA
finn-a-H7_EYE	Diseases of the eye and adnexa	0	NA	Binary	94036	16152119	2020	NA	NA	NA	Males and Females	European	29396	67103	NA	NA	NA
ukb-d-VII_EYE_ADNEXA	Diseases of the eye and adnexa	0	NA	Binary	361194	13586589	2018	NA	Neale lab	NA	Males and Females	European	29878	331316	NA	NA	NA
ukb-d-XIV_GENITOURINARY	Diseases of the genitourinary system	0	NA	Binary	361194	13586589	2018	NA	Neale lab	NA	Males and Females	European	71620	289574	NA	NA	NA
finn-a-XIV_GENITOURINARY	Diseases of the genitourinary system	0	NA	Binary	94036	16152119	2020	NA	NA	NA	Males and Females	European	41595	54904	NA	NA	NA
finn-a-XIII_MUSCULOSKELET	Diseases of the musculoskeletal system and connective tissue	0	NA	Binary	94036	16152119	2020	NA	NA	NA	Males and Females	European	47751	48748	NA	NA	NA
finn-a-M13_MUSCULOSKELETAL	Diseases of the musculoskeletal system and connective tissue	0	NA	Binary	94036	16152119	2020	NA	NA	NA	Males and Females	European	47648	48851	NA	NA	NA
ukb-d-XIII_MUSCULOSKELET	Diseases of the musculoskeletal system and connective tissue	0	NA	Binary	361194	13586589	2018	NA	Neale lab	NA	Males and Females	European	77099	284095	NA	NA	NA
finn-a-G6_MYONEU	Diseases of the myoneural junction and muscle	0	NA	Binary	94036	16152119	2020	NA	NA	NA	Males and Females	European	573	95926	NA	NA	NA
finn-a-VI_NERVOUS	Diseases of the nervous system	0	NA	Binary	94036	16152119	2020	NA	NA	NA	Males and Females	European	27076	69423	NA	NA	NA
ukb-d-VI_NERVOUS	Diseases of the nervous system	0	NA	Binary	361194	13586589	2018	NA	Neale lab	NA	Males and Females	European	21323	339871	NA	NA	NA
ukb-d-X_RESPIRATORY	Diseases of the respiratory system	0	NA	Binary	361194	13586589	2018	NA	Neale lab	NA	Males and Females	European	25381	335813	NA	NA	NA
finn-a-J10_RESPIRATORY	Diseases of the respiratory system	0	NA	Binary	94036	16152119	2020	NA	NA	NA	Males and Females	European	43120	53379	NA	NA	NA
finn-a-X_RESPIRATORY	Diseases of the respiratory system	0	NA	Binary	94036	16152119	2020	NA	NA	NA	Males and Females	European	41882	54617	NA	NA	NA
ukb-d-XII_SKIN_SUBCUTAN	Diseases of the skin and subcutaneous tissue	0	NA	Binary	361194	13586589	2018	NA	Neale lab	NA	Males and Females	European	27074	334120	NA	NA	NA
finn-a-XII_SKIN_SUBCUTAN	Diseases of the skin and subcutaneous tissue	0	NA	Binary	94036	16152119	2020	NA	NA	NA	Males and Females	European	19757	76742	NA	NA	NA
finn-a-L12_SKIN	Diseases of the skin and subcutaneous tissue	0	NA	Binary	94036	16152119	2020	NA	NA	NA	Males and Females	European	19588	76911	NA	NA	NA
finn-a-I9_DISVEINLYMPH	Diseases of veins, lymphatic vessels and lymph nodes, not elsewhere classified	0	NA	Binary	94036	16152119	2020	NA	NA	NA	Males and Females	European	12037	84462	NA	NA	NA
ukb-d-I9_DISVEINLYMPH	Diseases of veins, lymphatic vessels and lymph nodes, not elsewhere classified	0	NA	Binary	361194	13542754	2018	NA	Neale lab	NA	Males and Females	European	11867	349327	NA	NA	NA
finn-a-FG_DISVEINLYMPH	Diseases of veins, lymphatic vessels and lymph nodes, not elsewhere classified (FINNGEN)	0	NA	Binary	94036	16152119	2020	NA	NA	NA	Males and Females	European	10558	56378	NA	NA	NA
finn-a-J10_VOCALLARYNX	Diseases of vocal cords and larynx+other diseases of upper respiratory tract, no elsewhere classified	0	NA	Binary	94036	16152119	2020	NA	NA	NA	Males and Females	European	3785	76330	NA	NA	NA
finn-a-E4_LIPOPROTNAS	Disorder of lipoprotein metabolism, unspecified	0	NA	Binary	94036	16152119	2020	NA	NA	NA	Males and Females	European	679	91366	NA	NA	NA
finn-a-F5_PERSOBEH	Disorders of adult personality and behaviour	0	NA	Binary	94036	16152119	2020	NA	NA	NA	Males and Females	European	2779	93720	NA	NA	NA
finn-a-N14_BREAST	Disorders of breast	0	NA	Binary	94036	16152119	2020	NA	NA	NA	Males and Females	European	3495	50767	NA	NA	NA
finn-a-E4_CA_MET	Disorders of calcium metabolism	0	NA	Binary	94036	16152119	2020	NA	NA	NA	Males and Females	European	216	96218	NA	NA	NA
finn-a-H7_CHOROIDRETINA	Disorders of choroid and retina	0	NA	Binary	94036	16152119	2020	NA	NA	NA	Males and Females	European	5881	90618	NA	NA	NA
finn-a-H7_CONJUNCTIVA	Disorders of conjunctiva	0	NA	Binary	94036	16152119	2020	NA	NA	NA	Males and Females	European	5935	90564	NA	NA	NA
finn-a-M13_BONECONTINUITY	Disorders of continuity of bone	0	NA	Binary	94036	16152119	2020	NA	NA	NA	Males and Females	European	386	93083	NA	NA	NA
finn-a-H7_EYELIDINOTH	Disorders of eyelid in diseases classified elsewhere	0	NA	Binary	94036	16152119	2020	NA	NA	NA	Males and Females	European	183	90757	NA	NA	NA
finn-a-H7_LIDLACRIMALORBIT	Disorders of eyelid, lacrimal system and orbit	0	NA	Binary	94036	16152119	2020	NA	NA	NA	Males and Females	European	5742	90757	NA	NA	NA
ukb-d-K11_GALLBILPANC	Disorders of gallbladder, biliary tract and pancreas	0	NA	Binary	361194	13586589	2018	NA	Neale lab	NA	Males and Females	European	13922	347272	NA	NA	NA
finn-a-K11_GALLBILPANC	Disorders of gallbladder, biliary tract and pancreas	0	NA	Binary	94036	16152119	2020	NA	NA	NA	Males and Females	European	9364	87135	NA	NA	NA
finn-a-H7_GLOBE	Disorders of globe	0	NA	Binary	94036	16152119	2020	NA	NA	NA	Males and Females	European	151	93829	NA	NA	NA
ukb-d-H7_LACRIMALSYSTEM	Disorders of lacrimal system	0	NA	Binary	361194	10027398	2018	NA	Neale lab	NA	Males and Females	European	1555	359639	NA	NA	NA
finn-a-H7_LACRIMALSYSTEM	Disorders of lacrimal system	0	NA	Binary	94036	16152119	2020	NA	NA	NA	Males and Females	European	2256	90757	NA	NA	NA
ukb-d-H7_LENS	Disorders of lens	0	NA	Binary	361194	13586589	2018	NA	Neale lab	NA	Males and Females	European	17076	344118	NA	NA	NA
finn-a-H7_LENS	Disorders of lens	0	NA	Binary	94036	16152119	2020	NA	NA	NA	Males and Females	European	10803	85696	NA	NA	NA
finn-a-E4_LIPOPROT	Disorders of lipoprotein metabolism and other lipidaemias	0	NA	Binary	94036	16152119	2020	NA	NA	NA	Males and Females	European	5133	88782	NA	NA	NA
finn-a-E4_MINERAL_MET	Disorders of mineral metabolism	0	NA	Binary	94036	16152119	2020	NA	NA	NA	Males and Females	European	281	88782	NA	NA	NA
finn-a-M13_MUSCLE	Disorders of muscles	0	NA	Binary	94036	16152119	2020	NA	NA	NA	Males and Females	European	566	76986	NA	NA	NA
finn-a-H7_OCUMUSCLE	Disorders of ocular muscles, binocular movement, accommodation and refraction	0	NA	Binary	94036	16152119	2020	NA	NA	NA	Males and Females	European	2893	93606	NA	NA	NA
finn-a-H7_OPTNERVE	Disorders of optic nerve and visual pathways	0	NA	Binary	94036	16152119	2020	NA	NA	NA	Males and Females	European	468	96031	NA	NA	NA
finn-a-H7_ORBIT	Disorders of orbit	0	NA	Binary	94036	16152119	2020	NA	NA	NA	Males and Females	European	214	90757	NA	NA	NA
finn-a-E4_ENDOGLAND	Disorders of other endocrine glands	0	NA	Binary	94036	16152119	2020	NA	NA	NA	Males and Females	European	2583	93916	NA	NA	NA
finn-a-E4_PARATHYRO	Disorders of parathyroid gland	0	NA	Binary	94036	16152119	2020	NA	NA	NA	Males and Females	European	1241	93916	NA	NA	NA
finn-a-F5_PSYCHDEV	Disorders of psychological developtment	0	NA	Binary	94036	16152119	2020	NA	NA	NA	Males and Females	European	580	95919	NA	NA	NA
finn-a-H7_REFRAACCOMMODIS	Disorders of refraction and accommodation	0	NA	Binary	94036	16152119	2020	NA	NA	NA	Males and Females	European	1206	93606	NA	NA	NA
finn-a-H7_SCLERACORNEA	Disorders of sclera, cornea, iris and ciliary body	0	NA	Binary	94036	16152119	2020	NA	NA	NA	Males and Females	European	3732	92767	NA	NA	NA
finn-a-L12_DISORDSKINAPPENDIX	Disorders of skin appendages	0	NA	Binary	94036	16152119	2020	NA	NA	NA	Males and Females	European	2929	93570	NA	NA	NA
finn-a-M13_SYNOTEND	Disorders of synovium and tendon	0	NA	Binary	94036	16152119	2020	NA	NA	NA	Males and Females	European	4025	76986	NA	NA	NA
ukb-d-M13_SYNOTEND	Disorders of synovium and tendon	0	NA	Binary	361194	12330288	2018	NA	Neale lab	NA	Males and Females	European	5894	355300	NA	NA	NA
finn-a-E4_THYROID	Disorders of the thyroid gland	0	NA	Binary	94036	16152119	2020	NA	NA	NA	Males and Females	European	11981	84518	NA	NA	NA
finn-a-THYROID_DISORDER_IBD	Disorders of thyroid, IBD co-morbidities	0	NA	Binary	94036	16152119	2020	NA	NA	NA	Males and Females	European	1755	32142	NA	NA	NA
finn-a-H8_VERTIGO	Disorders of vestibular function (Vertigo)	0	NA	Binary	94036	16152119	2020	NA	NA	NA	Males and Females	European	2845	92866	NA	NA	NA
finn-a-H7_VITRBODYGLOBE	Disorders of vitreous body	0	NA	Binary	94036	16152119	2020	NA	NA	NA	Males and Females	European	2536	93829	NA	NA	NA
finn-a-H7_VITREOUS	Disorders of vitreous body and globe	0	NA	Binary	94036	16152119	2020	NA	NA	NA	Males and Females	European	2670	93829	NA	NA	NA
finn-a-I9_AORTDIS	Dissection of aorta	0	NA	Binary	94036	16152119	2020	NA	NA	NA	Males and Females	European	148	92349	NA	NA	NA
finn-a-F5_DISPER	Dissocial personality disorder	0	NA	Binary	94036	16152119	2020	NA	NA	NA	Males and Females	European	176	93720	NA	NA	NA
finn-a-F5_DISSOCIATIVE	Dissociative [conversion] disorders	0	NA	Binary	94036	16152119	2020	NA	NA	NA	Males and Females	European	272	88700	NA	NA	NA
finn-a-F5_ADHD	Disturbance of activity and attention	0	NA	Binary	94036	16152119	2020	NA	NA	NA	Males and Females	European	241	95477	NA	NA	NA
finn-a-H7_DIVERGSTRAB	Divergent concomitant strabismus	0	NA	Binary	94036	16152119	2020	NA	NA	NA	Males and Females	European	576	93606	NA	NA	NA
finn-a-K11_DIVERTIC	Diverticular disease of intestine	0	NA	Binary	94036	16152119	2020	NA	NA	NA	Males and Females	European	5242	82769	NA	NA	NA
ukb-b-11297	Doctor diagnosed asthma	1	NA	Binary	112583	9851867	2018	MRC-IEU	Ben Elsworth	NA	Males and Females	European	14283	98300	NA	SD	22127: Output from GWAS pipeline using Phesant derived variables from UKBiobank
ukb-b-1234	Doctor diagnosed chronic bronchitis	1	NA	Binary	112583	9851867	2018	MRC-IEU	Ben Elsworth	NA	Males and Females	European	1273	111310	NA	SD	22129: Output from GWAS pipeline using Phesant derived variables from UKBiobank
ukb-b-20464	Doctor diagnosed COPD (chronic obstructive pulmonary disease)	1	NA	Binary	112583	9851867	2018	MRC-IEU	Ben Elsworth	NA	Males and Females	European	1658	110925	NA	SD	22130: Output from GWAS pipeline using Phesant derived variables from UKBiobank
ukb-b-7178	Doctor diagnosed hayfever or allergic rhinitis	1	NA	Binary	112583	9851867	2018	MRC-IEU	Ben Elsworth	NA	Males and Females	European	25486	87097	NA	SD	22126: Output from GWAS pipeline using Phesant derived variables from UKBiobank
finn-a-M13_DORSALGIA	Dorsalgia	0	NA	Binary	94036	16152119	2020	NA	NA	NA	Males and Females	European	11332	74589	NA	NA	NA
ukb-d-M13_DORSALGIA	Dorsalgia	0	NA	Binary	361194	13041945	2018	NA	Neale lab	NA	Males and Females	European	8799	352395	NA	NA	NA
finn-a-M13_DORSOPATHY	Dorsopathies	0	NA	Binary	94036	16152119	2020	NA	NA	NA	Males and Females	European	21910	74589	NA	NA	NA
finn-a-DRY_AMD	Dry age-related macular degeneration (includes geographic atrophy)	0	NA	Binary	94036	16152119	2020	NA	NA	NA	Males and Females	European	860	47834	NA	NA	NA
finn-a-K11_DULC	Duodenal ulcer	0	NA	Binary	94036	16152119	2020	NA	NA	NA	Males and Females	European	702	85160	NA	NA	NA
ukb-d-I9_PHLETHROMBDVTLOW	DVT of lower extremities	0	NA	Binary	361194	10544982	2018	NA	Neale lab	NA	Males and Females	European	2116	359078	NA	NA	NA
finn-a-I9_PHLETHROMBDVTLOW	DVT of lower extremities	0	NA	Binary	94036	16152119	2020	NA	NA	NA	Males and Females	European	1785	84462	NA	NA	NA
finn-a-I9_DVTANDPULM	DVT of lower extremities and pulmonary embolism	0	NA	Binary	94036	16152119	2020	NA	NA	NA	Males and Females	European	2872	93627	NA	NA	NA
ukb-d-I9_DVTANDPULM	DVT of lower extremities and pulmonary embolism	0	NA	Binary	361194	11783033	2018	NA	Neale lab	NA	Males and Females	European	4319	356875	NA	NA	NA
finn-a-N14_DYSPLACERVUT	Dysplasia of cervi uteri	0	NA	Binary	94036	16152119	2020	NA	NA	NA	Males and Females	European	1614	31753	NA	NA	NA
finn-a-G6_DYSTON	Dystonia	0	NA	Binary	94036	16152119	2020	NA	NA	NA	Males and Females	European	313	94467	NA	NA	NA
finn-a-COPD_EARLY	Early onset COPD	0	NA	Binary	94036	16152119	2020	NA	NA	NA	Males and Females	European	1231	67360	NA	NA	NA
finn-a-COPD_EARLY_EXMORE	Early onset COPD	0	NA	Binary	94036	16152119	2020	NA	NA	NA	Males and Females	European	1231	67360	NA	NA	NA
ukb-d-20429	Easily tired during worst period of anxiety	0	NA	Binary	34121	13541412	2018	NA	Neale lab	NA	Males and Females	European	24544	9577	NA	NA	NA
finn-a-KRA_PSY_EATING	Eating disorders	0	NA	Binary	94036	16152119	2020	NA	NA	NA	Males and Females	European	500	95999	NA	NA	NA
finn-a-F5_EATING	Eating disorders	0	NA	Binary	94036	16152119	2020	NA	NA	NA	Males and Females	European	696	95803	NA	NA	NA
finn-a-H7_ECTROPION	Ectropion of eyelid	0	NA	Binary	94036	16152119	2020	NA	NA	NA	Males and Females	European	149	90757	NA	NA	NA
ukb-b-14444	Egg consumers	1	NA	Binary	64949	9851867	2018	MRC-IEU	Ben Elsworth	NA	Males and Females	European	13705	51244	NA	SD	102930: Output from GWAS pipeline using Phesant derived variables from UKBiobank
finn-a-I9_REVACS	Emergency coronary revascularization (for ACS)	0	NA	Binary	94036	16152119	2020	NA	NA	NA	Males and Females	European	3928	92571	NA	NA	NA
finn-a-F5_EMOCHILD	Emotional disorders and disorders of social functioning with onset specific to childhood	0	NA	Binary	94036	16152119	2020	NA	NA	NA	Males and Females	European	299	95477	NA	NA	NA
finn-a-KRA_PSY_CHILDEMOT	Emotional disorders starting during childhood or adolecense	0	NA	Binary	94036	16152119	2020	NA	NA	NA	Males and Females	European	266	96233	NA	NA	NA
finn-a-F5_EMOPER	Emotionally unstable personality disorder	0	NA	Binary	94036	16152119	2020	NA	NA	NA	Males and Females	European	1060	93720	NA	NA	NA
finn-a-J10_EMPHYSEMA	Emphysema	0	NA	Binary	94036	16152119	2020	NA	NA	NA	Males and Females	European	233	83986	NA	NA	NA
finn-a-IV_ENDOCRIN_NUTRIT	Endocrine, nutritional and metabolic diseases	0	NA	Binary	94036	16152119	2020	NA	NA	NA	Males and Females	European	21128	75371	NA	NA	NA
finn-a-E4_ENDONUTRMET	Endocrine, nutritional and metabolic diseases	0	NA	Binary	94036	16152119	2020	NA	NA	NA	Males and Females	European	30065	66434	NA	NA	NA
ukb-d-IV_ENDOCRIN_NUTRIT	Endocrine, nutritional and metabolic diseases	0	NA	Binary	361194	12691214	2018	NA	Neale lab	NA	Males and Females	European	7218	353976	NA	NA	NA
finn-a-N14_ENDOMETRIOSIS	Endometriosis	0	NA	Binary	94036	16152119	2020	NA	NA	NA	Males and Females	European	3380	31753	NA	NA	NA
finn-a-ENDOMETRIOSIS_OVARY	Endometriosis of ovary	0	NA	Binary	94036	16152119	2020	NA	NA	NA	Males and Females	European	1348	93119	NA	NA	NA
finn-a-N14_ENDOMETRIOSIS_OVARY	Endometriosis of ovary	0	NA	Binary	94036	16152119	2020	NA	NA	NA	Males and Females	European	1348	31753	NA	NA	NA
finn-a-ENDOMETRIOSIS_PELVICPERITONEUM	Endometriosis of pelvic peritoneum	0	NA	Binary	94036	16152119	2020	NA	NA	NA	Males and Females	European	1175	93119	NA	NA	NA
finn-a-N14_ENDOMETRIOSIS_PELVICPERITONEUM	Endometriosis of pelvic peritoneum	0	NA	Binary	94036	16152119	2020	NA	NA	NA	Males and Females	European	1175	31753	NA	NA	NA
finn-a-N14_ENDOMETRIOSIS_RECTPVAGSEPT_VAGINA	Endometriosis of rectovaginal septum and vagina	0	NA	Binary	94036	16152119	2020	NA	NA	NA	Males and Females	European	537	31753	NA	NA	NA
finn-a-ENDOMETRIOSIS_RECTPVAGSEPT_VAGINA	Endometriosis of rectovaginal septum and vagina	0	NA	Binary	94036	16152119	2020	NA	NA	NA	Males and Females	European	537	93119	NA	NA	NA
finn-a-N14_ENDOMETRIOSIS_UTERUS	Endometriosis of uterus	0	NA	Binary	94036	16152119	2020	NA	NA	NA	Males and Females	European	885	31753	NA	NA	NA
finn-a-ENDOMETRIOSIS_UTERUS	Endometriosis of uterus	0	NA	Binary	94036	16152119	2020	NA	NA	NA	Males and Females	European	885	93119	NA	NA	NA
ukb-d-IBD_ENDOMETRIOSIS	Endometriosis, IBD co-morbidity	0	NA	Binary	361194	9983671	2018	NA	Neale lab	NA	Males and Females	European	1516	359678	NA	NA	NA
finn-a-IBD_ENDOMETRIOSIS	Endometriosis, IBD co-morbidity	0	NA	Binary	94036	16152119	2020	NA	NA	NA	Males and Females	European	3380	32142	NA	NA	NA
finn-a-I9_ANEUR	Endovascular or surgical operations to intracerebral aneurysms	0	NA	Binary	94036	16152119	2020	NA	NA	NA	Males and Females	European	245	90757	NA	NA	NA
finn-a-C_DIFFICILE_ENTEROCOLITIS	Enterocolitis due to Clostridium difficile	0	NA	Binary	94036	16152119	2020	NA	NA	NA	Males and Females	European	493	95549	NA	NA	NA
finn-a-M13_ENTESOPATHYLOW	Enthesopathies of lower limb, excluding foot	0	NA	Binary	94036	16152119	2020	NA	NA	NA	Males and Females	European	1330	74589	NA	NA	NA
finn-a-H7_ENTROPION	Entropion and trichiasis of eyelid	0	NA	Binary	94036	16152119	2020	NA	NA	NA	Males and Females	European	388	90757	NA	NA	NA
finn-a-G6_EPLEPSY	Epilepsy	0	NA	Binary	94036	16152119	2020	NA	NA	NA	Males and Females	European	2490	83167	NA	NA	NA
finn-a-H7_EPISCLERITIS	Episcleritis	0	NA	Binary	94036	16152119	2020	NA	NA	NA	Males and Females	European	259	92767	NA	NA	NA
finn-a-G6_EPIPAROX	Episodal and paroxysmal disorders	0	NA	Binary	94036	16152119	2020	NA	NA	NA	Males and Females	European	13332	83167	NA	NA	NA
ukb-d-G6_EPIPAROX	Episodal and paroxysmal disorders	0	NA	Binary	361194	12182374	2018	NA	Neale lab	NA	Males and Females	European	5418	355776	NA	NA	NA
finn-a-N14_EROSECTROPUT	Erosion and ectropion of cervix uteri	0	NA	Binary	94036	16152119	2020	NA	NA	NA	Males and Females	European	216	31753	NA	NA	NA
finn-a-L12_ERYTHEMANODOSUM	Erythema nodosum	0	NA	Binary	94036	16152119	2020	NA	NA	NA	Males and Females	European	152	94158	NA	NA	NA
finn-a-ETMOIDECTOMY	Etmoidectomy	0	NA	Binary	94036	16152119	2020	NA	NA	NA	Males and Females	European	616	95501	NA	NA	NA
ukb-d-20431	Ever addicted to a behaviour or miscellanous	0	NA	Binary	6934	10101427	2018	NA	Neale lab	NA	Males and Females	European	1625	5309	NA	NA	NA
ukb-d-20406	Ever addicted to alcohol	0	NA	Binary	6514	11012887	2018	NA	Neale lab	NA	Males and Females	European	2778	3736	NA	NA	NA
ukb-d-20401	Ever addicted to any substance or behaviour	0	NA	Binary	116746	12641710	2018	NA	Neale lab	NA	Males and Females	European	7023	109723	NA	NA	NA
ukb-d-20483	Ever attempted suicide	0	NA	Binary	4933	10941854	2018	NA	Neale lab	NA	Males and Females	European	2658	2275	NA	NA	NA
ukb-d-20411_0	Ever been injured or injured someone else through drinking alcohol: No	0	NA	Binary	118002	13571587	2018	NA	Neale lab	NA	Males and Females	European	112909	5093	NA	NA	NA
ukb-d-20411_1	Ever been injured or injured someone else through drinking alcohol: Yes, but not in the last year	0	NA	Binary	118002	11871351	2018	NA	Neale lab	NA	Males and Females	European	4541	113461	NA	NA	NA
ukb-b-6848	Ever depressed for a whole week	1	NA	Binary	149899	9851867	2018	MRC-IEU	Ben Elsworth	NA	Males and Females	European	80611	69288	NA	SD	4598: Output from GWAS pipeline using Phesant derived variables from UKBiobank
ukb-d-20421	Ever felt worried, tense, or anxious for most of a month or longer	0	NA	Binary	110315	13570571	2018	NA	Neale lab	NA	Males and Females	European	29351	80964	NA	NA	NA
ukb-b-17001	Ever had bowel cancer screening	1	NA	Binary	455259	9851867	2018	MRC-IEU	Ben Elsworth	NA	Males and Females	European	146163	309096	NA	SD	2345: Output from GWAS pipeline using Phesant derived variables from UKBiobank
ukb-b-15041	Ever had breast cancer screening / mammogram	1	NA	Binary	250666	9851867	2018	MRC-IEU	Ben Elsworth	NA	Males and Females	European	202216	48450	NA	SD	2674: Output from GWAS pipeline using Phesant derived variables from UKBiobank
ukb-d-5324_0	Ever had cataract surgery: No	0	NA	Binary	5799	11711119	2018	NA	Neale lab	NA	Males and Females	European	4137	1662	NA	NA	NA
ukb-b-7128	Ever had cervical smear test	1	NA	Binary	250465	9851867	2018	MRC-IEU	Ben Elsworth	NA	Males and Females	European	245275	5190	NA	SD	2694: Output from GWAS pipeline using Phesant derived variables from UKBiobank
ukb-d-5328_0	Ever had corneal graft surgery: No	0	NA	Binary	5786	12258529	2018	NA	Neale lab	NA	Males and Females	European	5644	142	NA	NA	NA
ukb-b-6445	Ever had hysterectomy (womb removed)	1	NA	Binary	221697	9851867	2018	MRC-IEU	Ben Elsworth	NA	Males and Females	European	18171	203526	NA	SD	3591: Output from GWAS pipeline using Phesant derived variables from UKBiobank
ukb-d-20405_0	Ever had known person concerned about, or recommend reduction of, alcohol consumption: No	0	NA	Binary	117880	13571660	2018	NA	Neale lab	NA	Males and Females	European	107474	10406	NA	NA	NA
ukb-d-20405_1	Ever had known person concerned about, or recommend reduction of, alcohol consumption: Yes, but not in the last year	0	NA	Binary	117880	12203571	2018	NA	Neale lab	NA	Males and Females	European	5482	112398	NA	NA	NA
ukb-d-20405_2	Ever had known person concerned about, or recommend reduction of, alcohol consumption: Yes, during the last year	0	NA	Binary	117880	12013477	2018	NA	Neale lab	NA	Males and Females	European	4924	112956	NA	NA	NA
ukb-d-5327_0	Ever had laser treatment for glaucoma or high eye pressure: No	0	NA	Binary	5788	12244365	2018	NA	Neale lab	NA	Males and Females	European	5597	191	NA	NA	NA
ukb-d-20502	Ever had period extreme irritability	0	NA	Binary	114422	13571113	2018	NA	Neale lab	NA	Males and Females	European	29747	84675	NA	NA	NA
ukb-d-20501	Ever had period of mania / excitability	0	NA	Binary	115338	11973911	2018	NA	Neale lab	NA	Males and Females	European	4816	110522	NA	NA	NA
ukb-d-20446	Ever had prolonged feelings of sadness or depression	0	NA	Binary	117763	13571578	2018	NA	Neale lab	NA	Males and Females	European	64374	53389	NA	NA	NA
ukb-d-20441	Ever had prolonged loss of interest in normal activities	0	NA	Binary	117727	13571568	2018	NA	Neale lab	NA	Males and Females	European	46330	71397	NA	NA	NA
ukb-b-15695	Ever had prostate specific antigen (PSA) test	1	NA	Binary	200410	9851867	2018	MRC-IEU	Ben Elsworth	NA	Males and Females	European	62489	137921	NA	SD	2365: Output from GWAS pipeline using Phesant derived variables from UKBiobank
ukb-d-5325_4	Ever had refractive laser eye surgery: Both eyes	0	NA	Binary	5719	9675799	2018	NA	Neale lab	NA	Males and Females	European	1258	4461	NA	NA	NA
ukb-d-5325_0	Ever had refractive laser eye surgery: No	0	NA	Binary	5719	11690177	2018	NA	Neale lab	NA	Males and Females	European	4085	1634	NA	NA	NA
ukb-b-12026	Ever had same-sex intercourse	1	NA	Binary	418120	9851867	2018	MRC-IEU	Ben Elsworth	NA	Males and Females	European	14480	403640	NA	SD	2159: Output from GWAS pipeline using Phesant derived variables from UKBiobank
ukb-b-12621	Ever had stillbirth, spontaneous miscarriage or termination	1	NA	Binary	247180	9851867	2018	MRC-IEU	Ben Elsworth	NA	Males and Females	European	79047	168133	NA	SD	2774: Output from GWAS pipeline using Phesant derived variables from UKBiobank
ukb-d-20463	Ever heard an un-real voice	0	NA	Binary	117503	10457877	2018	NA	Neale lab	NA	Males and Females	European	2009	115494	NA	NA	NA
ukb-b-8196	Ever highly irritable/argumentative for 2 days	1	NA	Binary	149501	9851867	2018	MRC-IEU	Ben Elsworth	NA	Males and Females	European	27205	122296	NA	SD	4653: Output from GWAS pipeline using Phesant derived variables from UKBiobank
ukb-b-15272	Ever manic/hyper for 2 days	1	NA	Binary	149144	9851867	2018	MRC-IEU	Ben Elsworth	NA	Males and Females	European	8680	140464	NA	SD	4642: Output from GWAS pipeline using Phesant derived variables from UKBiobank
ukb-d-20471	Ever seen an un-real vision	0	NA	Binary	116787	11546760	2018	NA	Neale lab	NA	Males and Females	European	3768	113019	NA	NA	NA
ukb-d-20480	Ever self-harmed	0	NA	Binary	117733	12075154	2018	NA	Neale lab	NA	Males and Females	European	5099	112634	NA	NA	NA
ukb-b-20261	Ever smoked	1	NA	Binary	461066	9851867	2018	MRC-IEU	Ben Elsworth	NA	Males and Females	European	280508	180558	NA	SD	20160: Output from GWAS pipeline using Phesant derived variables from UKBiobank
ukb-d-20499	Ever sought or received professional help for mental distress	0	NA	Binary	117677	13571561	2018	NA	Neale lab	NA	Males and Females	European	46020	71657	NA	NA	NA
ukb-b-11355	Ever stopped smoking for 6+ months	1	NA	Binary	113230	9851867	2018	MRC-IEU	Ben Elsworth	NA	Males and Females	European	48981	64249	NA	SD	2907: Output from GWAS pipeline using Phesant derived variables from UKBiobank
ukb-d-20500	Ever suffered mental distress preventing usual activities	0	NA	Binary	116527	13571416	2018	NA	Neale lab	NA	Males and Females	European	38681	77846	NA	NA	NA
ukb-b-9509	Ever taken oral contraceptive pill	1	NA	Binary	250440	9851867	2018	MRC-IEU	Ben Elsworth	NA	Males and Females	European	205516	44924	NA	SD	2784: Output from GWAS pipeline using Phesant derived variables from UKBiobank
ukb-d-20477	Ever talked to a health professional about unusual or psychotic experiences	0	NA	Binary	5788	9630473	2018	NA	Neale lab	NA	Males and Females	European	1225	4563	NA	NA	NA
ukb-b-18674	Ever unenthusiastic/disinterested for a whole week	1	NA	Binary	146542	9851867	2018	MRC-IEU	Ben Elsworth	NA	Males and Females	European	54234	92308	NA	SD	4631: Output from GWAS pipeline using Phesant derived variables from UKBiobank
ukb-b-18541	Ever used hormone-replacement therapy (HRT)	1	NA	Binary	250301	9851867	2018	MRC-IEU	Ben Elsworth	NA	Males and Females	European	97920	152381	NA	SD	2814: Output from GWAS pipeline using Phesant derived variables from UKBiobank
ukb-d-20425	Ever worried more than most people would in similar situation	0	NA	Binary	98990	13569194	2018	NA	Neale lab	NA	Males and Females	European	25623	73367	NA	NA	NA
finn-a-N14_MESNRUIRREG	Excessive, freguent and irrelgular menstruation	0	NA	Binary	94036	16152119	2020	NA	NA	NA	Males and Females	European	7453	31753	NA	NA	NA
finn-a-ASTHMA_EXCL	Excluding asthma or asthma-COPD overlap	0	NA	Binary	94036	16152119	2020	NA	NA	NA	Males and Females	European	30281	66218	NA	NA	NA
finn-a-XX_EXTERNAL_MORB_MORT	External causes of morbidity and mortality	0	NA	Binary	94036	16152119	2020	NA	NA	NA	Males and Females	European	6953	89546	NA	NA	NA
ukb-b-10821	External causes: W01.9 Unspecified place	1	NA	Binary	463010	9851867	2018	MRC-IEU	Ben Elsworth	NA	Males and Females	European	1079	461931	NA	SD	41201#W019: Output from GWAS pipeline using Phesant derived variables from UKBiobank
ukb-b-19713	External causes: W19.9 Unspecified place	1	NA	Binary	463010	9851867	2018	MRC-IEU	Ben Elsworth	NA	Males and Females	European	1815	461195	NA	SD	41201#W199: Output from GWAS pipeline using Phesant derived variables from UKBiobank
ukb-b-13114	External causes: X59.9 Unspecified place	1	NA	Binary	463010	9851867	2018	MRC-IEU	Ben Elsworth	NA	Males and Females	European	2537	460473	NA	SD	41201#X599: Output from GWAS pipeline using Phesant derived variables from UKBiobank
ukb-b-9976	External causes: Y83.1 Surgical operation with implant of artificial internal device	1	NA	Binary	463010	9851867	2018	MRC-IEU	Ben Elsworth	NA	Males and Females	European	3421	459589	NA	SD	41201#Y831: Output from GWAS pipeline using Phesant derived variables from UKBiobank
ukb-b-8105	External causes: Y83.2 Surgical operation with anastomosis, bypass or graft	1	NA	Binary	463010	9851867	2018	MRC-IEU	Ben Elsworth	NA	Males and Females	European	1099	461911	NA	SD	41201#Y832: Output from GWAS pipeline using Phesant derived variables from UKBiobank
ukb-b-17102	External causes: Y83.6 Removal of other organ (partial) (total)	1	NA	Binary	463010	9851867	2018	MRC-IEU	Ben Elsworth	NA	Males and Females	European	2611	460399	NA	SD	41201#Y836: Output from GWAS pipeline using Phesant derived variables from UKBiobank
ukb-b-16989	External causes: Y83.8 Other surgical procedures	1	NA	Binary	463010	9851867	2018	MRC-IEU	Ben Elsworth	NA	Males and Females	European	3988	459022	NA	SD	41201#Y838: Output from GWAS pipeline using Phesant derived variables from UKBiobank
finn-a-G6_XTRAPYR	Extrapyramidal and movement disorders	0	NA	Binary	94036	16152119	2020	NA	NA	NA	Males and Females	European	2032	94467	NA	NA	NA
ukb-b-8329	Eye problems/disorders: Cataract	1	NA	Binary	150642	9851867	2018	MRC-IEU	Ben Elsworth	NA	Males and Females	European	14254	136388	NA	SD	6148#4: Output from GWAS pipeline using Phesant derived variables from UKBiobank
ukb-b-10181	Eye problems/disorders: Diabetes related eye disease	1	NA	Binary	150642	9851867	2018	MRC-IEU	Ben Elsworth	NA	Males and Females	European	2940	147702	NA	SD	6148#1: Output from GWAS pipeline using Phesant derived variables from UKBiobank
ukb-b-17324	Eye problems/disorders: Glaucoma	1	NA	Binary	150642	9851867	2018	MRC-IEU	Ben Elsworth	NA	Males and Females	European	6464	144178	NA	SD	6148#2: Output from GWAS pipeline using Phesant derived variables from UKBiobank
ukb-b-9050	Eye problems/disorders: Injury or trauma resulting in loss of vision	1	NA	Binary	150642	9851867	2018	MRC-IEU	Ben Elsworth	NA	Males and Females	European	2770	147872	NA	SD	6148#3: Output from GWAS pipeline using Phesant derived variables from UKBiobank
ukb-b-17194	Eye problems/disorders: Macular degeneration	1	NA	Binary	150642	9851867	2018	MRC-IEU	Ben Elsworth	NA	Males and Females	European	3553	147089	NA	SD	6148#5: Output from GWAS pipeline using Phesant derived variables from UKBiobank
ukb-b-2506	Eye problems/disorders: None of the above	1	NA	Binary	150642	9851867	2018	MRC-IEU	Ben Elsworth	NA	Males and Females	European	117423	33219	NA	SD	6148#100: Output from GWAS pipeline using Phesant derived variables from UKBiobank
ukb-b-10066	Eye problems/disorders: Other serious eye condition	1	NA	Binary	150642	9851867	2018	MRC-IEU	Ben Elsworth	NA	Males and Females	European	8438	142204	NA	SD	6148#6: Output from GWAS pipeline using Phesant derived variables from UKBiobank
ukb-d-4067	Facial pains for 3+ months	0	NA	Binary	6510	11208821	2018	NA	Neale lab	NA	Males and Females	European	3107	3403	NA	NA	NA
finn-a-XXI_HEALTHFACTORS	Factors influencing health status and contact with health services	0	NA	Binary	94036	16152119	2020	NA	NA	NA	Males and Females	European	58952	37547	NA	NA	NA
ukb-d-XXI_HEALTHFACTORS	Factors influencing health status and contact with health services	0	NA	Binary	361194	13586589	2018	NA	Neale lab	NA	Males and Females	European	45947	315247	NA	NA	NA
ukb-b-15508	Fat removed from meat	1	NA	Binary	16902	9851867	2018	MRC-IEU	Ben Elsworth	NA	Males and Females	European	15643	1259	NA	SD	103120: Output from GWAS pipeline using Phesant derived variables from UKBiobank
ukb-b-13160	Father still alive	1	NA	Binary	450333	9851867	2018	MRC-IEU	Ben Elsworth	NA	Males and Females	European	103919	346414	NA	SD	1797: Output from GWAS pipeline using Phesant derived variables from UKBiobank
ukb-b-19809	Fed-up feelings	1	NA	Binary	453071	9851867	2018	MRC-IEU	Ben Elsworth	NA	Males and Females	European	184258	268813	NA	SD	1960: Output from GWAS pipeline using Phesant derived variables from UKBiobank
ukb-d-20449	Feelings of tiredness during worst episode of depression	0	NA	Binary	59774	13558384	2018	NA	Neale lab	NA	Males and Females	European	48952	10822	NA	NA	NA
ukb-d-20450	Feelings of worthlessness during worst period of depression	0	NA	Binary	62128	13559197	2018	NA	Neale lab	NA	Males and Females	European	31593	30535	NA	NA	NA
finn-a-N14_FEMGENPROL	Female genital prolapse	0	NA	Binary	94036	16152119	2020	NA	NA	NA	Males and Females	European	3643	31753	NA	NA	NA
finn-a-N14_FEMALEINFERT	Female infertility	0	NA	Binary	94036	16152119	2020	NA	NA	NA	Males and Females	European	2427	31753	NA	NA	NA
finn-a-N14_FIANOV	Female infertility, associated with anovulation	0	NA	Binary	94036	16152119	2020	NA	NA	NA	Males and Females	European	370	51835	NA	NA	NA
finn-a-N14_FIOTHNAS	Female infertility, cervigal, vaginal, other or unspecified origin	0	NA	Binary	94036	16152119	2020	NA	NA	NA	Males and Females	European	2151	94065	NA	NA	NA
finn-a-N14_FITUB	Female infertility, tubal origin	0	NA	Binary	94036	16152119	2020	NA	NA	NA	Males and Females	European	293	51835	NA	NA	NA
finn-a-K11_FEMHER	Femoral hernia	0	NA	Binary	94036	16152119	2020	NA	NA	NA	Males and Females	European	310	85350	NA	NA	NA
finn-a-FESS	FESS (DNB20)	0	NA	Binary	94036	16152119	2020	NA	NA	NA	Males and Females	European	585	95525	NA	NA	NA
ukb-d-5699	FI10 : arithmetic sequence recognition	0	NA	Binary	20880	13520623	2018	NA	Neale lab	NA	Males and Females	European	16721	4159	NA	NA	NA
ukb-d-5779	FI11 : antonym	0	NA	Binary	12493	13068168	2018	NA	Neale lab	NA	Males and Females	European	8943	3550	NA	NA	NA
ukb-d-4946	FI2 : identify largest number	0	NA	Binary	116869	13567695	2018	NA	Neale lab	NA	Males and Females	European	115919	950	NA	NA	NA
ukb-d-4957	FI3 : word interpolation	0	NA	Binary	116815	13567695	2018	NA	Neale lab	NA	Males and Females	European	98753	18062	NA	NA	NA
ukb-d-4968	FI4 : positional arithmetic	0	NA	Binary	115690	13567564	2018	NA	Neale lab	NA	Males and Females	European	98344	17346	NA	NA	NA
ukb-d-4979	FI5 : family relationship calculation	0	NA	Binary	113356	13567322	2018	NA	Neale lab	NA	Males and Females	European	55922	57434	NA	NA	NA
ukb-d-4990	FI6 : conditional arithmetic	0	NA	Binary	102181	13565871	2018	NA	Neale lab	NA	Males and Females	European	69944	32237	NA	NA	NA
ukb-d-5001	FI7 : synonym	0	NA	Binary	84560	13562423	2018	NA	Neale lab	NA	Males and Females	European	74026	10534	NA	NA	NA
ukb-d-5012	FI8 : chained arithmetic	0	NA	Binary	75692	13560286	2018	NA	Neale lab	NA	Males and Females	European	49086	26606	NA	NA	NA
ukb-d-5556	FI9 : concept interpolation	0	NA	Binary	35147	13540898	2018	NA	Neale lab	NA	Males and Females	European	19701	15446	NA	NA	NA
ukb-d-M13_FIBROBLASTIC	Fibroblastic disorders	0	NA	Binary	361194	11254856	2018	NA	Neale lab	NA	Males and Females	European	3190	358004	NA	NA	NA
finn-a-M13_FIBROBLASTIC	Fibroblastic disorders	0	NA	Binary	94036	16152119	2020	NA	NA	NA	Males and Females	European	1609	76986	NA	NA	NA
finn-a-M13_FIBROMYALGIA	Fibromyalgia	0	NA	Binary	94036	16152119	2020	NA	NA	NA	Males and Females	European	178	76986	NA	NA	NA
finn-a-FIBRO_COMORB	Fibromyalgia related co-morbidities	0	NA	Binary	94036	16152119	2020	NA	NA	NA	Males and Females	European	10420	53332	NA	NA	NA
ukb-d-FIBRO_COMORB	Fibromyalgia related co-morbidities	0	NA	Binary	361194	10692533	2018	NA	Neale lab	NA	Males and Females	European	2305	358889	NA	NA	NA
finn-a-K11_FIBROCHIRLIV	Fibrosis and chirrhosis of liver	0	NA	Binary	94036	16152119	2020	NA	NA	NA	Males and Females	European	233	94685	NA	NA	NA
ukb-d-4294_0	Final attempt correct: no	0	NA	Binary	119729	11888016	2018	NA	Neale lab	NA	Males and Females	European	4581	115148	NA	NA	NA
ukb-d-4294_1	Final attempt correct: yes	0	NA	Binary	119729	13568067	2018	NA	Neale lab	NA	Males and Females	European	115007	4722	NA	NA	NA
finn-a-RHEUMA_ENDPOINTS	Finngen Rheumatological endpoints	0	NA	Binary	94036	16152119	2020	NA	NA	NA	Males and Females	European	17424	79075	NA	NA	NA
ukb-b-17673	Fish consumer	1	NA	Binary	64949	9851867	2018	MRC-IEU	Ben Elsworth	NA	Males and Females	European	18743	46206	NA	SD	103140: Output from GWAS pipeline using Phesant derived variables from UKBiobank
finn-a-K11_FISSANAL	Fissure and fistula of anal and rectal regions	0	NA	Binary	94036	16152119	2020	NA	NA	NA	Males and Females	European	1725	82769	NA	NA	NA
finn-a-M13_FLATFOOT	Flat foot [pes planus] (acquired)	0	NA	Binary	94036	16152119	2020	NA	NA	NA	Males and Females	European	475	67688	NA	NA	NA
finn-a-G6_FOCALBRAININJ	Focal brain injury	0	NA	Binary	94036	16152119	2020	NA	NA	NA	Males and Females	European	426	91328	NA	NA	NA
finn-a-L12_FOLLICULARCYST	Follicular cysts of skin and subcutaneous tissue	0	NA	Binary	94036	16152119	2020	NA	NA	NA	Males and Females	European	1105	93570	NA	NA	NA
finn-a-CD2_FOLLICULAR_LYMPHOMA	Follicular lymphoma	0	NA	Binary	94036	16152119	2020	NA	NA	NA	Males and Females	European	158	96341	NA	NA	NA
finn-a-CD2_FOLLICULAR_LYMPHOMA_EXALLC	Follicular lymphoma (ICD C excluded)	0	NA	Binary	94036	16152119	2020	NA	NA	NA	Males and Females	European	158	87061	NA	NA	NA
ukb-b-12654	Former alcohol drinker	1	NA	Binary	31506	9851867	2018	MRC-IEU	Ben Elsworth	NA	Males and Females	European	16191	15315	NA	SD	3731: Output from GWAS pipeline using Phesant derived variables from UKBiobank
ukb-b-15251	Fracture resulting from simple fall	1	NA	Binary	43883	9851867	2018	MRC-IEU	Ben Elsworth	NA	Males and Females	European	26126	17757	NA	SD	3005: Output from GWAS pipeline using Phesant derived variables from UKBiobank
ukb-b-15582	Fractured bone site(s): Ankle	1	NA	Binary	460340	9851867	2018	MRC-IEU	Ben Elsworth	NA	Males and Females	European	6479	453861	NA	SD	6151#1: Output from GWAS pipeline using Phesant derived variables from UKBiobank
ukb-b-19255	Fractured bone site(s): Arm	1	NA	Binary	460340	9851867	2018	MRC-IEU	Ben Elsworth	NA	Males and Females	European	4714	455626	NA	SD	6151#6: Output from GWAS pipeline using Phesant derived variables from UKBiobank
ukb-b-3798	Fractured bone site(s): Leg	1	NA	Binary	460340	9851867	2018	MRC-IEU	Ben Elsworth	NA	Males and Females	European	2988	457352	NA	SD	6151#2: Output from GWAS pipeline using Phesant derived variables from UKBiobank
ukb-b-17738	Fractured bone site(s): Other bones	1	NA	Binary	460340	9851867	2018	MRC-IEU	Ben Elsworth	NA	Males and Females	European	24060	436280	NA	SD	6151#7: Output from GWAS pipeline using Phesant derived variables from UKBiobank
ukb-b-873	Fractured bone site(s): Spine	1	NA	Binary	460340	9851867	2018	MRC-IEU	Ben Elsworth	NA	Males and Females	European	1036	459304	NA	SD	6151#4: Output from GWAS pipeline using Phesant derived variables from UKBiobank
ukb-b-9571	Fractured bone site(s): Wrist	1	NA	Binary	460340	9851867	2018	MRC-IEU	Ben Elsworth	NA	Males and Females	European	9113	451227	NA	SD	6151#5: Output from GWAS pipeline using Phesant derived variables from UKBiobank
ukb-b-13346	Fractured/broken bones in last 5 years	1	NA	Binary	460389	9851867	2018	MRC-IEU	Ben Elsworth	NA	Males and Females	European	44502	415887	NA	SD	2463: Output from GWAS pipeline using Phesant derived variables from UKBiobank
ukb-d-20427	Frequent trouble falling or staying asleep during worst period of anxiety	0	NA	Binary	35584	13542829	2018	NA	Neale lab	NA	Males and Females	European	29129	6455	NA	NA	NA
ukb-b-17554	Fruit consumers	1	NA	Binary	64949	9851867	2018	MRC-IEU	Ben Elsworth	NA	Males and Females	European	52989	11960	NA	SD	104400: Output from GWAS pipeline using Phesant derived variables from UKBiobank
finn-a-K11_FUNCDYSP	Functional dyspepsia	0	NA	Binary	94036	16152119	2020	NA	NA	NA	Males and Females	European	1790	85160	NA	NA	NA
ukb-d-M13_GANGLION	Ganglion	0	NA	Binary	361194	10642236	2018	NA	Neale lab	NA	Males and Females	European	2239	358955	NA	NA	NA
finn-a-M13_GANGLION	Ganglion	0	NA	Binary	94036	16152119	2020	NA	NA	NA	Males and Females	European	1572	76986	NA	NA	NA
ukb-d-22660_103	Gap coding: Full-time or part-time education	0	NA	Binary	68899	13559659	2018	NA	Neale lab	NA	Males and Females	European	12489	56410	NA	NA	NA
ukb-d-22660_105	Gap coding: Looking after the home and/or family	0	NA	Binary	69370	13560222	2018	NA	Neale lab	NA	Males and Females	European	24577	44793	NA	NA	NA
ukb-d-22660_101	Gap coding: Paid work for less than 15 hours per week on average or lasting less than 6 months	0	NA	Binary	68751	13560222	2018	NA	Neale lab	NA	Males and Females	European	15086	53665	NA	NA	NA
ukb-d-22660_108	Gap coding: Retired	0	NA	Binary	70119	13560222	2018	NA	Neale lab	NA	Males and Females	European	53542	16577	NA	NA	NA
ukb-d-22660_106	Gap coding: Unable to work due to sickness or disability	0	NA	Binary	67892	10474309	2018	NA	Neale lab	NA	Males and Females	European	2028	65864	NA	NA	NA
ukb-d-22660_107	Gap coding: Unemployed	0	NA	Binary	68042	11471563	2018	NA	Neale lab	NA	Males and Females	European	3610	64432	NA	NA	NA
ukb-d-22660_102	Gap coding: Unpaid or voluntary work	0	NA	Binary	67956	10847326	2018	NA	Neale lab	NA	Males and Females	European	2521	65435	NA	NA	NA
ukb-b-10806	Gas or solid-fuel cooking/heating: A gas fire that you use regularly in winter time	1	NA	Binary	461398	9851867	2018	MRC-IEU	Ben Elsworth	NA	Males and Females	European	185577	275821	NA	SD	6139#2: Output from GWAS pipeline using Phesant derived variables from UKBiobank
ukb-b-13824	Gas or solid-fuel cooking/heating: A gas hob or gas cooker	1	NA	Binary	461398	9851867	2018	MRC-IEU	Ben Elsworth	NA	Males and Females	European	323455	137943	NA	SD	6139#1: Output from GWAS pipeline using Phesant derived variables from UKBiobank
ukb-b-17097	Gas or solid-fuel cooking/heating: An open solid fuel fire that you use regularly in winter time	1	NA	Binary	461398	9851867	2018	MRC-IEU	Ben Elsworth	NA	Males and Females	European	40700	420698	NA	SD	6139#3: Output from GWAS pipeline using Phesant derived variables from UKBiobank
ukb-b-10979	Gas or solid-fuel cooking/heating: None of the above	1	NA	Binary	461398	9851867	2018	MRC-IEU	Ben Elsworth	NA	Males and Females	European	81433	379965	NA	SD	6139#100: Output from GWAS pipeline using Phesant derived variables from UKBiobank
finn-a-K11_GULC	Gastric ulcer	0	NA	Binary	94036	16152119	2020	NA	NA	NA	Males and Females	European	1156	85160	NA	NA	NA
finn-a-K11_REFLUX	Gastro-oesophageal reflux disease	0	NA	Binary	94036	16152119	2020	NA	NA	NA	Males and Females	European	4883	85160	NA	NA	NA
ukb-d-K11_GASTRODUOULC	Gastroduodenal ulcer	0	NA	Binary	361194	11399988	2018	NA	Neale lab	NA	Males and Females	European	3467	357727	NA	NA	NA
finn-a-K11_GASTRODUOULC	Gastroduodenal ulcer	0	NA	Binary	94036	16152119	2020	NA	NA	NA	Males and Females	European	1818	85160	NA	NA	NA
finn-a-K11_GIDISEASES	Gastrointestinal diseases	0	NA	Binary	94036	16152119	2020	NA	NA	NA	Males and Females	European	39639	56860	NA	NA	NA
ukb-d-2956	General pain for 3+ months	0	NA	Binary	5473	11884244	2018	NA	Neale lab	NA	Males and Females	European	4570	903	NA	NA	NA
finn-a-F5_GAD	Generalized anxiety disorder	0	NA	Binary	94036	16152119	2020	NA	NA	NA	Males and Females	European	729	88700	NA	NA	NA
ukb-d-is_female	Genetic sex	0	NA	Binary	361194	13586589	2018	NA	Neale lab	NA	Males and Females	European	194174	167020	NA	NA	NA
finn-a-N14_GENITOURINARY	Genitourinary diseases	0	NA	Binary	94036	16152119	2020	NA	NA	NA	Males and Females	European	41372	55127	NA	NA	NA
finn-a-GEST_DIABETES	Gestational diabetes (for exclusion)	0	NA	Binary	94036	16152119	2020	NA	NA	NA	Males and Females	European	2062	52200	NA	NA	NA
ukb-d-K11_GIBLEEDING	GI-bleeding	0	NA	Binary	361194	12121746	2018	NA	Neale lab	NA	Males and Females	European	5235	355959	NA	NA	NA
finn-a-K11_GIBLEEDING	GI-bleeding	0	NA	Binary	94036	16152119	2020	NA	NA	NA	Males and Females	European	1710	93690	NA	NA	NA
finn-a-M13_GIANTCELL	Giant cell arteritis	0	NA	Binary	94036	16152119	2020	NA	NA	NA	Males and Females	European	148	94550	NA	NA	NA
finn-a-GIANT_CELL_TEMP_ARTERITIS	Giant cell arteritis with polymyalgia rheumatica	0	NA	Binary	94036	16152119	2020	NA	NA	NA	Males and Females	European	133	96246	NA	NA	NA
finn-a-H7_GLAUCOMA	Glaucoma	0	NA	Binary	94036	16152119	2020	NA	NA	NA	Males and Females	European	3463	93036	NA	NA	NA
finn-a-H7_GLAUCSECDISEASE	Glaucoma secondary to other eye disorders	0	NA	Binary	94036	16152119	2020	NA	NA	NA	Males and Females	European	216	93036	NA	NA	NA
finn-a-H7_GLAUCSUSP	Glaucoma suspect	0	NA	Binary	94036	16152119	2020	NA	NA	NA	Males and Females	European	1893	93036	NA	NA	NA
finn-a-N14_GLOMERULAR	Glomerular diseases	0	NA	Binary	94036	16152119	2020	NA	NA	NA	Males and Females	European	1501	94998	NA	NA	NA
finn-a-N14_GLOMEINOTH	Glomerular disorders in diseases classified elsewhere	0	NA	Binary	94036	16152119	2020	NA	NA	NA	Males and Females	European	513	94998	NA	NA	NA
finn-a-GLOMER_NEPHRITIS	Glomerulonephritis	0	NA	Binary	94036	16152119	2020	NA	NA	NA	Males and Females	European	1305	95194	NA	NA	NA
finn-a-GLP1ANA	Glucagon-like peptide-1 (GLP-1) analogues	0	NA	Binary	94036	16152119	2020	NA	NA	NA	Males and Females	European	3160	85744	NA	NA	NA
finn-a-M13_ARTHROSIS_KNEE	Gonarthrosis	0	NA	Binary	94036	16152119	2020	NA	NA	NA	Males and Females	European	9110	67688	NA	NA	NA
finn-a-KNEE_ARTHROSIS	Gonarthrosis [arthrosis of knee](FG)	0	NA	Binary	94036	16152119	2020	NA	NA	NA	Males and Females	European	9110	79075	NA	NA	NA
ukb-d-KNEE_ARTHROSIS	Gonarthrosis [arthrosis of knee](FG)	0	NA	Binary	361194	13545975	2018	NA	Neale lab	NA	Males and Females	European	11900	349294	NA	NA	NA
finn-a-M13_GOUT	Gout	0	NA	Binary	94036	16152119	2020	NA	NA	NA	Males and Females	European	1179	67688	NA	NA	NA
finn-a-GOUT_COMORB	Gout-related co-morbidities	0	NA	Binary	94036	16152119	2020	NA	NA	NA	Males and Females	European	27339	53332	NA	NA	NA
finn-a-GOUT	Gout, FINNGEN	0	NA	Binary	94036	16152119	2020	NA	NA	NA	Males and Females	European	1179	91076	NA	NA	NA
finn-a-GOUT_NOS	Gout, unspecified	0	NA	Binary	94036	16152119	2020	NA	NA	NA	Males and Females	European	601	95320	NA	NA	NA
finn-a-L12_GRANULOMATOUSSKIN	Granulomatous disorders of skin and subcutaneous tissue	0	NA	Binary	94036	16152119	2020	NA	NA	NA	Males and Females	European	148	92525	NA	NA	NA
ukb-b-10169	Guilty feelings	1	NA	Binary	450704	9851867	2018	MRC-IEU	Ben Elsworth	NA	Males and Females	European	129383	321321	NA	SD	2030: Output from GWAS pipeline using Phesant derived variables from UKBiobank
ukb-b-9937	Had major operations	1	NA	Binary	210168	9851867	2018	MRC-IEU	Ben Elsworth	NA	Males and Females	European	134945	75223	NA	SD	2415: Output from GWAS pipeline using Phesant derived variables from UKBiobank
ukb-b-18105	Had menopause	1	NA	Binary	211114	9851867	2018	MRC-IEU	Ben Elsworth	NA	Males and Females	European	153820	57294	NA	SD	2724: Output from GWAS pipeline using Phesant derived variables from UKBiobank
ukb-b-15378	Had other major operations	1	NA	Binary	248845	9851867	2018	MRC-IEU	Ben Elsworth	NA	Males and Females	European	167188	81657	NA	SD	2844: Output from GWAS pipeline using Phesant derived variables from UKBiobank
finn-a-CD2_BENIGN_HEAMANGIOMA_LYMPHANGIOMA	Haemangioma and lymphangioma, any site	0	NA	Binary	94036	16152119	2020	NA	NA	NA	Males and Females	European	460	96039	NA	NA	NA
finn-a-CD2_BENIGN_HEAMANGIOMA_LYMPHANGIOMA_EXALLC	Haemangioma and lymphangioma, any site (ICD C excluded)	0	NA	Binary	94036	16152119	2020	NA	NA	NA	Males and Females	European	460	86667	NA	NA	NA
finn-a-CD2_BENIGN_HEMANGIOMA	Haemangioma, any site	0	NA	Binary	94036	16152119	2020	NA	NA	NA	Males and Females	European	434	96065	NA	NA	NA
finn-a-CD2_BENIGN_HEMANGIOMA_EXALLC	Haemangioma, any site (ICD C excluded)	0	NA	Binary	94036	16152119	2020	NA	NA	NA	Males and Females	European	434	86692	NA	NA	NA
finn-a-K11_HAEMORR	Haemmorrhoids and perianal venous thrombosis	0	NA	Binary	94036	16152119	2020	NA	NA	NA	Males and Females	European	1629	82769	NA	NA	NA
finn-a-D3_HAEMOLYTICANAEMIA	Haemolytic anaemias	0	NA	Binary	94036	16152119	2020	NA	NA	NA	Males and Females	European	139	96360	NA	NA	NA
ukb-d-1747_5	Hair colour (natural, before greying): Black	0	NA	Binary	360270	13586531	2018	NA	Neale lab	NA	Males and Females	European	15809	344461	NA	NA	NA
ukb-d-1747_1	Hair colour (natural, before greying): Blonde	0	NA	Binary	360270	13586531	2018	NA	Neale lab	NA	Males and Females	European	41178	319092	NA	NA	NA
ukb-d-1747_4	Hair colour (natural, before greying): Dark brown	0	NA	Binary	360270	13586531	2018	NA	Neale lab	NA	Males and Females	European	134627	225643	NA	NA	NA
ukb-d-1747_3	Hair colour (natural, before greying): Light brown	0	NA	Binary	360270	13586531	2018	NA	Neale lab	NA	Males and Females	European	147560	212710	NA	NA	NA
ukb-d-1747_6	Hair colour (natural, before greying): Other	0	NA	Binary	360270	11847798	2018	NA	Neale lab	NA	Males and Females	European	4481	355789	NA	NA	NA
ukb-d-1747_2	Hair colour (natural, before greying): Red	0	NA	Binary	360270	13586531	2018	NA	Neale lab	NA	Males and Females	European	16615	343655	NA	NA	NA
ukb-d-2395_1	Hair/balding pattern: Pattern 1	0	NA	Binary	165649	13577604	2018	NA	Neale lab	NA	Males and Females	European	53076	112573	NA	NA	NA
ukb-d-M13_HALLUXRIGIDUS	Hallux rigidus	0	NA	Binary	361194	9496883	2018	NA	Neale lab	NA	Males and Females	European	1130	360064	NA	NA	NA
finn-a-M13_HALLUXRIGIDUS	Hallux rigidus	0	NA	Binary	94036	16152119	2020	NA	NA	NA	Males and Females	European	941	67688	NA	NA	NA
ukb-d-M13_HALLUXVALGUS	Hallux valgus (acquired)	0	NA	Binary	361194	12166675	2018	NA	Neale lab	NA	Males and Females	European	5370	355824	NA	NA	NA
finn-a-M13_HALLUXVALGUS	Hallux valgus (acquired)	0	NA	Binary	94036	16152119	2020	NA	NA	NA	Males and Females	European	3656	67688	NA	NA	NA
ukb-d-1707_1	Handedness (chirality/laterality): Right-handed	0	NA	Binary	360913	13586570	2018	NA	Neale lab	NA	Males and Females	European	320242	40671	NA	NA	NA
ukb-b-13092	Headaches for 3+ months	1	NA	Binary	91269	9851867	2018	MRC-IEU	Ben Elsworth	NA	Males and Females	European	41719	49550	NA	SD	3799: Output from GWAS pipeline using Phesant derived variables from UKBiobank
ukb-b-19060	Hearing aid user	1	NA	Binary	280546	9851867	2018	MRC-IEU	Ben Elsworth	NA	Males and Females	European	14048	266498	NA	SD	3393: Output from GWAS pipeline using Phesant derived variables from UKBiobank
ukb-b-18275	Hearing difficulty/problems with background noise	1	NA	Binary	453482	9851867	2018	MRC-IEU	Ben Elsworth	NA	Males and Females	European	171586	281896	NA	SD	2257: Output from GWAS pipeline using Phesant derived variables from UKBiobank
ukb-d-2247_0	Hearing difficulty/problems: No	0	NA	Binary	346635	13586289	2018	NA	Neale lab	NA	Males and Females	European	255838	90797	NA	NA	NA
ukb-d-4849_0	Hearing test done: No, I am unable to do this	0	NA	Binary	119880	9767519	2018	NA	Neale lab	NA	Males and Females	European	1330	118550	NA	NA	NA
ukb-d-4849_1	Hearing test done: Yes	0	NA	Binary	119880	13568109	2018	NA	Neale lab	NA	Males and Females	European	117205	2675	NA	NA	NA
ukb-d-HEARTFAIL	Heart failure	0	NA	Binary	361194	9858439	2018	NA	Neale lab	NA	Males and Females	European	1405	359789	NA	NA	NA
finn-a-HEARTFAIL	Heart failure	0	NA	Binary	94036	16152119	2020	NA	NA	NA	Males and Females	European	8016	75137	NA	NA	NA
finn-a-I9_HEARTFAIL_NS	Heart failure, not strict	0	NA	Binary	94036	16152119	2020	NA	NA	NA	Males and Females	European	8016	88483	NA	NA	NA
ukb-d-I9_HEARTFAIL_NS	Heart failure, not strict	0	NA	Binary	361194	9858439	2018	NA	Neale lab	NA	Males and Females	European	1405	359789	NA	NA	NA
ukb-d-I9_HEARTFAIL	Heart failure,strict	0	NA	Binary	361194	9858439	2018	NA	Neale lab	NA	Males and Females	European	1405	359789	NA	NA	NA
finn-a-I9_HEARTFAIL	Heart failure,strict	0	NA	Binary	94036	16152119	2020	NA	NA	NA	Males and Females	European	786	88483	NA	NA	NA
finn-a-I9_HEARTFAIL_EXMORE	Heart failure,strict	0	NA	Binary	94036	16152119	2020	NA	NA	NA	Males and Females	European	786	88483	NA	NA	NA
ukb-b-1523	Heating type(s) in home: Electric storage heaters	1	NA	Binary	152863	9851867	2018	MRC-IEU	Ben Elsworth	NA	Males and Females	European	4650	148213	NA	SD	6140#2: Output from GWAS pipeline using Phesant derived variables from UKBiobank
ukb-b-17469	Heating type(s) in home: Gas central heating	1	NA	Binary	152863	9851867	2018	MRC-IEU	Ben Elsworth	NA	Males and Females	European	140595	12268	NA	SD	6140#1: Output from GWAS pipeline using Phesant derived variables from UKBiobank
ukb-b-14417	Heating type(s) in home: None of the above	1	NA	Binary	152863	9851867	2018	MRC-IEU	Ben Elsworth	NA	Males and Females	European	2931	149932	NA	SD	6140#100: Output from GWAS pipeline using Phesant derived variables from UKBiobank
ukb-b-4184	Heating type(s) in home: Oil (kerosene) central heating	1	NA	Binary	152863	9851867	2018	MRC-IEU	Ben Elsworth	NA	Males and Females	European	3892	148971	NA	SD	6140#3: Output from GWAS pipeline using Phesant derived variables from UKBiobank
finn-a-G6_HEMIPLE	Hemiplegia	0	NA	Binary	94036	16152119	2020	NA	NA	NA	Males and Females	European	326	95832	NA	NA	NA
finn-a-HEMODIAL	Hemodialysis	0	NA	Binary	94036	16152119	2020	NA	NA	NA	Males and Females	European	155	96344	NA	NA	NA
finn-a-K11_HEPFAIL	Hepatic failure, not elsewhere classified	0	NA	Binary	94036	16152119	2020	NA	NA	NA	Males and Females	European	147	94685	NA	NA	NA
ukb-d-K11_HERNIA	Hernia	0	NA	Binary	361194	13586589	2018	NA	Neale lab	NA	Males and Females	European	26197	334997	NA	NA	NA
finn-a-K11_HERNIA	Hernia	0	NA	Binary	94036	16152119	2020	NA	NA	NA	Males and Females	European	11149	85350	NA	NA	NA
finn-a-H7_HERPESKERATITIS	Herpesviral keratitis and keratoconjunctivitis	0	NA	Binary	94036	16152119	2020	NA	NA	NA	Males and Females	European	240	92767	NA	NA	NA
finn-a-H7_HETEROPHORIA	Heterophoria	0	NA	Binary	94036	16152119	2020	NA	NA	NA	Males and Females	European	392	93606	NA	NA	NA
finn-a-HIP_FRACTURE	Hip fracture	0	NA	Binary	94036	16152119	2020	NA	NA	NA	Males and Females	European	1619	82912	NA	NA	NA
ukb-b-133	Hip pain for 3+ months	1	NA	Binary	51516	9851867	2018	MRC-IEU	Ben Elsworth	NA	Males and Females	European	40152	11364	NA	SD	3414: Output from GWAS pipeline using Phesant derived variables from UKBiobank
ukb-d-41218_1	History of psychiatric care on admission: One or more previous psychiatric episodes with this Health Care Provider	0	NA	Binary	1872	9676251	2018	NA	Neale lab	NA	Males and Females	European	1254	618	NA	NA	NA
ukb-d-20118_8	Home area population density - urban or rural: England/Wales - Hamlet and Isolated Dwelling - less sparse	0	NA	Binary	357712	12863831	2018	NA	Neale lab	NA	Males and Females	European	7954	349758	NA	NA	NA
ukb-d-20118_6	Home area population density - urban or rural: England/Wales - Town and Fringe - less sparse	0	NA	Binary	357712	13586470	2018	NA	Neale lab	NA	Males and Females	European	25328	332384	NA	NA	NA
ukb-d-20118_5	Home area population density - urban or rural: England/Wales - Urban - less sparse	0	NA	Binary	357712	13586470	2018	NA	Neale lab	NA	Males and Females	European	279000	78712	NA	NA	NA
ukb-d-20118_16	Home area population density - urban or rural: Scotland - Accessible Rural	0	NA	Binary	357712	9637420	2018	NA	Neale lab	NA	Males and Females	European	1230	356482	NA	NA	NA
ukb-d-20118_13	Home area population density - urban or rural: Scotland - Accessible Small Town	0	NA	Binary	357712	9455734	2018	NA	Neale lab	NA	Males and Females	European	1102	356610	NA	NA	NA
ukb-d-20118_12	Home area population density - urban or rural: Scotland - Other Urban Area	0	NA	Binary	357712	11648400	2018	NA	Neale lab	NA	Males and Females	European	3998	353714	NA	NA	NA
finn-a-H7_HORDEOLUM	Hordeolum and other deep inflammation of eyelid	0	NA	Binary	94036	16152119	2020	NA	NA	NA	Males and Females	European	230	90757	NA	NA	NA
ukb-d-41231_1	Hospital episode type: General episode	0	NA	Binary	361194	13586589	2018	NA	Neale lab	NA	Males and Females	European	246807	114387	NA	NA	NA
ukb-b-374	How are people in household related to participant: Brother and/or sister	1	NA	Binary	459600	9851867	2018	MRC-IEU	Ben Elsworth	NA	Males and Females	European	2511	457089	NA	SD	6141#3: Output from GWAS pipeline using Phesant derived variables from UKBiobank
ukb-b-12252	How are people in household related to participant: Grandchild	1	NA	Binary	459600	9851867	2018	MRC-IEU	Ben Elsworth	NA	Males and Females	European	3795	455805	NA	SD	6141#6: Output from GWAS pipeline using Phesant derived variables from UKBiobank
ukb-b-698	How are people in household related to participant: Husband, wife or partner	1	NA	Binary	459600	9851867	2018	MRC-IEU	Ben Elsworth	NA	Males and Females	European	338180	121420	NA	SD	6141#1: Output from GWAS pipeline using Phesant derived variables from UKBiobank
ukb-b-16565	How are people in household related to participant: Mother and/or father	1	NA	Binary	459600	9851867	2018	MRC-IEU	Ben Elsworth	NA	Males and Females	European	8348	451252	NA	SD	6141#4: Output from GWAS pipeline using Phesant derived variables from UKBiobank
ukb-b-527	How are people in household related to participant: Other related	1	NA	Binary	459600	9851867	2018	MRC-IEU	Ben Elsworth	NA	Males and Females	European	2675	456925	NA	SD	6141#7: Output from GWAS pipeline using Phesant derived variables from UKBiobank
ukb-b-11010	How are people in household related to participant: Other unrelated	1	NA	Binary	459600	9851867	2018	MRC-IEU	Ben Elsworth	NA	Males and Females	European	8247	451353	NA	SD	6141#8: Output from GWAS pipeline using Phesant derived variables from UKBiobank
ukb-b-14280	How are people in household related to participant: Son and/or daughter (include step-children)	1	NA	Binary	459600	9851867	2018	MRC-IEU	Ben Elsworth	NA	Males and Females	European	156118	303482	NA	SD	6141#2: Output from GWAS pipeline using Phesant derived variables from UKBiobank
finn-a-AB1_HIV	Human immunodeficiency virus [HIV] disease	0	NA	Binary	94036	16152119	2020	NA	NA	NA	Males and Females	European	132	96367	NA	NA	NA
finn-a-N14_HYDROCELE	Hydrocele	0	NA	Binary	94036	16152119	2020	NA	NA	NA	Males and Females	European	1057	33781	NA	NA	NA
finn-a-G6_HYDROCEPH	Hydrocephalus	0	NA	Binary	94036	16152119	2020	NA	NA	NA	Males and Females	European	261	91612	NA	NA	NA
finn-a-N14_HYDRONEPHR	Hydronephrosis	0	NA	Binary	94036	16152119	2020	NA	NA	NA	Males and Females	European	464	91563	NA	NA	NA
finn-a-E4_HYPERPIT	Hyperfunction of pituitary gland	0	NA	Binary	94036	16152119	2020	NA	NA	NA	Males and Females	European	256	93916	NA	NA	NA
finn-a-E4_HYPERKALAEMIA	Hyperkalaemia	0	NA	Binary	94036	16152119	2020	NA	NA	NA	Males and Females	European	162	95063	NA	NA	NA
finn-a-KRA_PSY_HYPERKIN	Hyperkinetic disorders	0	NA	Binary	94036	16152119	2020	NA	NA	NA	Males and Females	European	282	96217	NA	NA	NA
finn-a-E4_HYPERLIPNAS	Hyperlipidaemia, other/unspecified	0	NA	Binary	94036	16152119	2020	NA	NA	NA	Males and Females	European	1539	91366	NA	NA	NA
finn-a-H7_HYPERMETRO	Hypermetropia	0	NA	Binary	94036	16152119	2020	NA	NA	NA	Males and Females	European	274	93606	NA	NA	NA
finn-a-M13_HYPERMOBILITY	Hypermobility syndrome	0	NA	Binary	94036	16152119	2020	NA	NA	NA	Males and Females	European	278	94550	NA	NA	NA
finn-a-E4_HYPERPARA	Hyperparathyroidism	0	NA	Binary	94036	16152119	2020	NA	NA	NA	Males and Females	European	1113	95258	NA	NA	NA
finn-a-N14_PROSTHYPERPLA	Hyperplasia of prostate	0	NA	Binary	94036	16152119	2020	NA	NA	NA	Males and Females	European	4620	33781	NA	NA	NA
finn-a-E4_HYPERPRO	Hyperprolactinaemia	0	NA	Binary	94036	16152119	2020	NA	NA	NA	Males and Females	European	217	96243	NA	NA	NA
ukb-d-I9_HYPTENS	Hypertension	0	NA	Binary	361194	9646741	2018	NA	Neale lab	NA	Males and Females	European	1237	359957	NA	NA	NA
finn-a-I9_HYPTENS	Hypertension	0	NA	Binary	94036	16152119	2020	NA	NA	NA	Males and Females	European	22142	69160	NA	NA	NA
finn-a-I9_HYPTENSPREG	Hypertension complicating pregnancy, childbirth, and the puerperium	0	NA	Binary	94036	16152119	2020	NA	NA	NA	Males and Females	European	3362	50900	NA	NA	NA
finn-a-I9_HYPTENSESS	Hypertension, essential	0	NA	Binary	94036	16152119	2020	NA	NA	NA	Males and Females	European	15870	74345	NA	NA	NA
ukb-d-I9_HYPERTENSION	Hypertensive diseases	0	NA	Binary	361194	9745180	2018	NA	Neale lab	NA	Males and Females	European	1313	359881	NA	NA	NA
finn-a-I9_HYPERTENSION	Hypertensive diseases	0	NA	Binary	94036	16152119	2020	NA	NA	NA	Males and Females	European	22154	74345	NA	NA	NA
finn-a-FG_HYPERTENSION	Hypertensive diseases (excluding secondary)	0	NA	Binary	94036	16152119	2020	NA	NA	NA	Males and Females	European	22154	56378	NA	NA	NA
finn-a-I9_HYPTENSHR	Hypertensive heart and/or renal disease	0	NA	Binary	94036	16152119	2020	NA	NA	NA	Males and Females	European	1798	74345	NA	NA	NA
finn-a-I9_HYPTENSHD	Hypertensive Heart Disease	0	NA	Binary	94036	16152119	2020	NA	NA	NA	Males and Females	European	1626	74345	NA	NA	NA
finn-a-I9_HYPTENSRD	Hypertensive Renal Disease	0	NA	Binary	94036	16152119	2020	NA	NA	NA	Males and Females	European	152	74345	NA	NA	NA
finn-a-L12_HYPERTROPHICSKIN	Hypertrophic disorders of skin	0	NA	Binary	94036	16152119	2020	NA	NA	NA	Males and Females	European	298	92525	NA	NA	NA
finn-a-L12_HYPETROPHICSCAR	Hypertrophic scar	0	NA	Binary	94036	16152119	2020	NA	NA	NA	Males and Females	European	285	92525	NA	NA	NA
finn-a-N14_HYPERTROPHYBREAST	Hypertrophy of breast	0	NA	Binary	94036	16152119	2020	NA	NA	NA	Males and Females	European	854	50767	NA	NA	NA
finn-a-E4_HYPOOSMNAT	Hypo-osmolality and hyponatraemia	0	NA	Binary	94036	16152119	2020	NA	NA	NA	Males and Females	European	810	95063	NA	NA	NA
finn-a-E4_HYPOGLYC	Hypoglycaemia, other or unspecified	0	NA	Binary	94036	16152119	2020	NA	NA	NA	Males and Females	European	377	95988	NA	NA	NA
finn-a-E4_HYPOKALAEMIA	Hypokalaemia	0	NA	Binary	94036	16152119	2020	NA	NA	NA	Males and Females	European	476	95063	NA	NA	NA
finn-a-E4_HYPOPARA	Hypoparathyroidism	0	NA	Binary	94036	16152119	2020	NA	NA	NA	Males and Females	European	148	95258	NA	NA	NA
finn-a-E4_HYPOPIT	Hypopituitarism	0	NA	Binary	94036	16152119	2020	NA	NA	NA	Males and Females	European	248	93916	NA	NA	NA
finn-a-HYPOSENSIBILIZATIONTHRPY	Hyposensibilization therapy	0	NA	Binary	94036	16152119	2020	NA	NA	NA	Males and Females	European	237	95552	NA	NA	NA
finn-a-I9_HYPOTE	Hypotension	0	NA	Binary	94036	16152119	2020	NA	NA	NA	Males and Females	European	663	95688	NA	NA	NA
finn-a-HYPOTHYROIDISM	Hypothyroidism (congenital or acquired)	0	NA	Binary	94036	16152119	2020	NA	NA	NA	Males and Females	European	10211	32736	NA	NA	NA
finn-a-E4_HYTHYNAS	Hypothyroidism,other/unspecified	0	NA	Binary	94036	16152119	2020	NA	NA	NA	Males and Females	European	10192	84518	NA	NA	NA
finn-a-IBD_COMORB	IBD co-morbidities, not ICD-10 XI	0	NA	Binary	94036	16152119	2020	NA	NA	NA	Males and Females	European	64357	32142	NA	NA	NA
finn-a-K11_KELAIBD	IBD patients in KELA-register	0	NA	Binary	94036	16152119	2020	NA	NA	NA	Males and Females	European	1246	93624	NA	NA	NA
finn-a-CUSTOM_KELAIBD	IBD patients in KELA-register	0	NA	Binary	94036	16152119	2020	NA	NA	NA	Males and Females	European	1246	93624	NA	NA	NA
finn-a-IBD_OPERATIONS	IBD-related operations	0	NA	Binary	94036	16152119	2020	NA	NA	NA	Males and Females	European	14144	82355	NA	NA	NA
finn-a-D1_ICD8	ICD-8 DM (Sub-endpoint used for defining DM endpoints)	0	NA	Binary	94036	16152119	2020	NA	NA	NA	Males and Females	European	230	93472	NA	NA	NA
finn-a-GOUT_IDIO	Idiopathic gout	0	NA	Binary	94036	16152119	2020	NA	NA	NA	Males and Females	European	255	95320	NA	NA	NA
finn-a-IPF	Idiopathic pulmonary fibrosis (attempt to specificity)	0	NA	Binary	94036	16152119	2020	NA	NA	NA	Males and Females	European	283	63212	NA	NA	NA
finn-a-D3_ITP	Idiopathic thrombocytopenic purpura	0	NA	Binary	94036	16152119	2020	NA	NA	NA	Males and Females	European	153	95596	NA	NA	NA
finn-a-ILD_CVDMETABOCOMORB	ILD Co-morbidites, CVD and metabolic diseases	0	NA	Binary	94036	16152119	2020	NA	NA	NA	Males and Females	European	29886	53684	NA	NA	NA
ukb-d-ILD_DIFF_DG	ILD differential diagnosis	0	NA	Binary	361194	13586589	2018	NA	Neale lab	NA	Males and Females	European	26710	334484	NA	NA	NA
finn-a-ILD_DIFF_DG	ILD differential diagnosis	0	NA	Binary	94036	16152119	2020	NA	NA	NA	Males and Females	European	30838	65661	NA	NA	NA
finn-a-ILD_AZATHIOPRINE	ILD medications: azathioprine	0	NA	Binary	94036	16152119	2020	NA	NA	NA	Males and Females	European	701	95798	NA	NA	NA
finn-a-ILD_IMMUNOSUPPRESSIVE	ILD medications: immunosuppressive drugs	0	NA	Binary	94036	16152119	2020	NA	NA	NA	Males and Females	European	3189	93310	NA	NA	NA
finn-a-ILD_CORTISONE	ILD medications: prednisolone, methylprednisolone, prednisone	0	NA	Binary	94036	16152119	2020	NA	NA	NA	Males and Females	European	1494	95005	NA	NA	NA
finn-a-ILD_COMORB	ILD-related co-morbidities	0	NA	Binary	94036	16152119	2020	NA	NA	NA	Males and Females	European	42815	53684	NA	NA	NA
finn-a-ILD_INSUFFICIENCY	ILD-related respiratory insufficiency	0	NA	Binary	94036	16152119	2020	NA	NA	NA	Males and Females	European	1174	95325	NA	NA	NA
finn-a-ILD_HOSPITAL2	ILD, hospital admission 2	0	NA	Binary	94036	16152119	2020	NA	NA	NA	Males and Females	European	324	96175	NA	NA	NA
finn-a-ILD_HOSPITAL	ILD, hospital admissions	0	NA	Binary	94036	16152119	2020	NA	NA	NA	Males and Females	European	534	95965	NA	NA	NA
finn-a-ILD_HOSPITAL1	ILD, hospital admissions 1	0	NA	Binary	94036	16152119	2020	NA	NA	NA	Males and Females	European	466	96033	NA	NA	NA
finn-a-ILD_HOSPITAL3	ILD, hospital admissions 3	0	NA	Binary	94036	16152119	2020	NA	NA	NA	Males and Females	European	280	96219	NA	NA	NA
ukb-b-18712	Illness, injury, bereavement, stress in last 2 years: Death of a close relative	1	NA	Binary	459742	9851867	2018	MRC-IEU	Ben Elsworth	NA	Males and Females	European	97179	362563	NA	SD	6145#3: Output from GWAS pipeline using Phesant derived variables from UKBiobank
ukb-b-7356	Illness, injury, bereavement, stress in last 2 years: Death of a spouse or partner	1	NA	Binary	459742	9851867	2018	MRC-IEU	Ben Elsworth	NA	Males and Females	European	7253	452489	NA	SD	6145#4: Output from GWAS pipeline using Phesant derived variables from UKBiobank
ukb-b-9667	Illness, injury, bereavement, stress in last 2 years: Financial difficulties	1	NA	Binary	459742	9851867	2018	MRC-IEU	Ben Elsworth	NA	Males and Females	European	53524	406218	NA	SD	6145#6: Output from GWAS pipeline using Phesant derived variables from UKBiobank
ukb-b-14624	Illness, injury, bereavement, stress in last 2 years: Marital separation/divorce	1	NA	Binary	459742	9851867	2018	MRC-IEU	Ben Elsworth	NA	Males and Females	European	14149	445593	NA	SD	6145#5: Output from GWAS pipeline using Phesant derived variables from UKBiobank
ukb-b-17687	Illness, injury, bereavement, stress in last 2 years: None of the above	1	NA	Binary	459742	9851867	2018	MRC-IEU	Ben Elsworth	NA	Males and Females	European	256792	202950	NA	SD	6145#100: Output from GWAS pipeline using Phesant derived variables from UKBiobank
ukb-b-9049	Illness, injury, bereavement, stress in last 2 years: Serious illness, injury or assault of a close relative	1	NA	Binary	459742	9851867	2018	MRC-IEU	Ben Elsworth	NA	Males and Females	European	53425	406317	NA	SD	6145#2: Output from GWAS pipeline using Phesant derived variables from UKBiobank
ukb-b-18162	Illness, injury, bereavement, stress in last 2 years: Serious illness, injury or assault to yourself	1	NA	Binary	459742	9851867	2018	MRC-IEU	Ben Elsworth	NA	Males and Females	European	42866	416876	NA	SD	6145#1: Output from GWAS pipeline using Phesant derived variables from UKBiobank
ukb-d-20112_101	Illnesses of adopted father: None of the above (group 2)	0	NA	Binary	2630	10396961	2018	NA	Neale lab	NA	Males and Females	European	1936	694	NA	NA	NA
ukb-d-20113_100	Illnesses of adopted mother: None of the above (group 1)	0	NA	Binary	2953	9755775	2018	NA	Neale lab	NA	Males and Females	European	1320	1633	NA	NA	NA
ukb-d-20113_101	Illnesses of adopted mother: None of the above (group 2)	0	NA	Binary	2973	10615673	2018	NA	Neale lab	NA	Males and Females	European	2203	770	NA	NA	NA
ukb-d-20114_100	Illnesses of adopted siblings: None of the above (group 1)	0	NA	Binary	1863	9820236	2018	NA	Neale lab	NA	Males and Females	European	1371	492	NA	NA	NA
ukb-d-20114_101	Illnesses of adopted siblings: None of the above (group 2)	0	NA	Binary	1869	10051536	2018	NA	Neale lab	NA	Males and Females	European	1577	292	NA	NA	NA
ukb-b-323	Illnesses of father: Alzheimer's disease/dementia	1	NA	Binary	399793	9851867	2018	MRC-IEU	Ben Elsworth	NA	Males and Females	European	19255	380538	NA	SD	20107#10: Output from GWAS pipeline using Phesant derived variables from UKBiobank
ukb-b-7910	Illnesses of father: Bowel cancer	1	NA	Binary	399920	9851867	2018	MRC-IEU	Ben Elsworth	NA	Males and Females	European	23883	376037	NA	SD	20107#4: Output from GWAS pipeline using Phesant derived variables from UKBiobank
ukb-b-9127	Illnesses of father: Chronic bronchitis/emphysema	1	NA	Binary	402389	9851867	2018	MRC-IEU	Ben Elsworth	NA	Males and Females	European	46263	356126	NA	SD	20107#6: Output from GWAS pipeline using Phesant derived variables from UKBiobank
ukb-b-20211	Illnesses of father: Diabetes	1	NA	Binary	400687	9851867	2018	MRC-IEU	Ben Elsworth	NA	Males and Females	European	38850	361837	NA	SD	20107#9: Output from GWAS pipeline using Phesant derived variables from UKBiobank
ukb-b-18408	Illnesses of father: Heart disease	1	NA	Binary	407557	9851867	2018	MRC-IEU	Ben Elsworth	NA	Males and Females	European	133320	274237	NA	SD	20107#1: Output from GWAS pipeline using Phesant derived variables from UKBiobank
ukb-b-19456	Illnesses of father: High blood pressure	1	NA	Binary	402899	9851867	2018	MRC-IEU	Ben Elsworth	NA	Males and Females	European	91242	311657	NA	SD	20107#8: Output from GWAS pipeline using Phesant derived variables from UKBiobank
ukb-b-14521	Illnesses of father: Lung cancer	1	NA	Binary	401624	9851867	2018	MRC-IEU	Ben Elsworth	NA	Males and Females	European	37443	364181	NA	SD	20107#3: Output from GWAS pipeline using Phesant derived variables from UKBiobank
ukb-b-15169	Illnesses of father: None of the above (group 1)	1	NA	Binary	402586	9851867	2018	MRC-IEU	Ben Elsworth	NA	Males and Females	European	149610	252976	NA	SD	20107#100: Output from GWAS pipeline using Phesant derived variables from UKBiobank
ukb-b-10415	Illnesses of father: None of the above (group 2)	1	NA	Binary	407392	9851867	2018	MRC-IEU	Ben Elsworth	NA	Males and Females	European	303978	103414	NA	SD	20107#101: Output from GWAS pipeline using Phesant derived variables from UKBiobank
ukb-b-956	Illnesses of father: Parkinson's disease	1	NA	Binary	399089	9851867	2018	MRC-IEU	Ben Elsworth	NA	Males and Females	European	10106	388983	NA	SD	20107#11: Output from GWAS pipeline using Phesant derived variables from UKBiobank
ukb-b-7773	Illnesses of father: Prostate cancer	1	NA	Binary	399670	9851867	2018	MRC-IEU	Ben Elsworth	NA	Males and Females	European	30945	368725	NA	SD	20107#13: Output from GWAS pipeline using Phesant derived variables from UKBiobank
ukb-b-5942	Illnesses of father: Severe depression	1	NA	Binary	399499	9851867	2018	MRC-IEU	Ben Elsworth	NA	Males and Females	European	15430	384069	NA	SD	20107#12: Output from GWAS pipeline using Phesant derived variables from UKBiobank
ukb-b-12777	Illnesses of father: Stroke	1	NA	Binary	402616	9851867	2018	MRC-IEU	Ben Elsworth	NA	Males and Females	European	62810	339806	NA	SD	20107#2: Output from GWAS pipeline using Phesant derived variables from UKBiobank
ukb-b-14699	Illnesses of mother: Alzheimer's disease/dementia	1	NA	Binary	423738	9851867	2018	MRC-IEU	Ben Elsworth	NA	Males and Females	European	36548	387190	NA	SD	20110#10: Output from GWAS pipeline using Phesant derived variables from UKBiobank
ukb-b-7748	Illnesses of mother: Bowel cancer	1	NA	Binary	423135	9851867	2018	MRC-IEU	Ben Elsworth	NA	Males and Females	European	22028	401107	NA	SD	20110#4: Output from GWAS pipeline using Phesant derived variables from UKBiobank
ukb-b-13584	Illnesses of mother: Breast cancer	1	NA	Binary	423458	9851867	2018	MRC-IEU	Ben Elsworth	NA	Males and Females	European	35102	388356	NA	SD	20110#5: Output from GWAS pipeline using Phesant derived variables from UKBiobank
ukb-b-12018	Illnesses of mother: Chronic bronchitis/emphysema	1	NA	Binary	423692	9851867	2018	MRC-IEU	Ben Elsworth	NA	Males and Females	European	25314	398378	NA	SD	20110#6: Output from GWAS pipeline using Phesant derived variables from UKBiobank
ukb-b-16451	Illnesses of mother: Diabetes	1	NA	Binary	423892	9851867	2018	MRC-IEU	Ben Elsworth	NA	Males and Females	European	40091	383801	NA	SD	20110#9: Output from GWAS pipeline using Phesant derived variables from UKBiobank
ukb-b-12477	Illnesses of mother: Heart disease	1	NA	Binary	426240	9851867	2018	MRC-IEU	Ben Elsworth	NA	Males and Females	European	85620	340620	NA	SD	20110#1: Output from GWAS pipeline using Phesant derived variables from UKBiobank
ukb-b-18167	Illnesses of mother: High blood pressure	1	NA	Binary	426391	9851867	2018	MRC-IEU	Ben Elsworth	NA	Males and Females	European	130948	295443	NA	SD	20110#8: Output from GWAS pipeline using Phesant derived variables from UKBiobank
ukb-b-20176	Illnesses of mother: Lung cancer	1	NA	Binary	423258	9851867	2018	MRC-IEU	Ben Elsworth	NA	Males and Females	European	17566	405692	NA	SD	20110#3: Output from GWAS pipeline using Phesant derived variables from UKBiobank
ukb-b-10454	Illnesses of mother: None of the above (group 1)	1	NA	Binary	425729	9851867	2018	MRC-IEU	Ben Elsworth	NA	Males and Females	European	176419	249310	NA	SD	20110#100: Output from GWAS pipeline using Phesant derived variables from UKBiobank
ukb-b-16027	Illnesses of mother: None of the above (group 2)	1	NA	Binary	428082	9851867	2018	MRC-IEU	Ben Elsworth	NA	Males and Females	European	330107	97975	NA	SD	20110#101: Output from GWAS pipeline using Phesant derived variables from UKBiobank
ukb-b-6548	Illnesses of mother: Parkinson's disease	1	NA	Binary	422464	9851867	2018	MRC-IEU	Ben Elsworth	NA	Males and Females	European	6998	415466	NA	SD	20110#11: Output from GWAS pipeline using Phesant derived variables from UKBiobank
ukb-b-10807	Illnesses of mother: Severe depression	1	NA	Binary	423217	9851867	2018	MRC-IEU	Ben Elsworth	NA	Males and Females	European	28351	394866	NA	SD	20110#12: Output from GWAS pipeline using Phesant derived variables from UKBiobank
ukb-b-4024	Illnesses of mother: Stroke	1	NA	Binary	424977	9851867	2018	MRC-IEU	Ben Elsworth	NA	Males and Females	European	60880	364097	NA	SD	20110#2: Output from GWAS pipeline using Phesant derived variables from UKBiobank
ukb-b-14043	Illnesses of siblings: Alzheimer's disease/dementia	1	NA	Binary	361264	9851867	2018	MRC-IEU	Ben Elsworth	NA	Males and Females	European	2094	359170	NA	SD	20111#10: Output from GWAS pipeline using Phesant derived variables from UKBiobank
ukb-b-12938	Illnesses of siblings: Bowel cancer	1	NA	Binary	361508	9851867	2018	MRC-IEU	Ben Elsworth	NA	Males and Females	European	8920	352588	NA	SD	20111#4: Output from GWAS pipeline using Phesant derived variables from UKBiobank
ukb-b-12227	Illnesses of siblings: Breast cancer	1	NA	Binary	361809	9851867	2018	MRC-IEU	Ben Elsworth	NA	Males and Females	European	16586	345223	NA	SD	20111#5: Output from GWAS pipeline using Phesant derived variables from UKBiobank
ukb-b-13952	Illnesses of siblings: Chronic bronchitis/emphysema	1	NA	Binary	361823	9851867	2018	MRC-IEU	Ben Elsworth	NA	Males and Females	European	10325	351498	NA	SD	20111#6: Output from GWAS pipeline using Phesant derived variables from UKBiobank
ukb-b-18042	Illnesses of siblings: Diabetes	1	NA	Binary	362826	9851867	2018	MRC-IEU	Ben Elsworth	NA	Males and Females	European	31073	331753	NA	SD	20111#9: Output from GWAS pipeline using Phesant derived variables from UKBiobank
ukb-b-14371	Illnesses of siblings: Heart disease	1	NA	Binary	363542	9851867	2018	MRC-IEU	Ben Elsworth	NA	Males and Females	European	37858	325684	NA	SD	20111#1: Output from GWAS pipeline using Phesant derived variables from UKBiobank
ukb-b-8746	Illnesses of siblings: High blood pressure	1	NA	Binary	364661	9851867	2018	MRC-IEU	Ben Elsworth	NA	Males and Females	European	77059	287602	NA	SD	20111#8: Output from GWAS pipeline using Phesant derived variables from UKBiobank
ukb-b-15826	Illnesses of siblings: Lung cancer	1	NA	Binary	361586	9851867	2018	MRC-IEU	Ben Elsworth	NA	Males and Females	European	8199	353387	NA	SD	20111#3: Output from GWAS pipeline using Phesant derived variables from UKBiobank
ukb-b-17360	Illnesses of siblings: None of the above (group 1)	1	NA	Binary	364971	9851867	2018	MRC-IEU	Ben Elsworth	NA	Males and Females	European	245626	119345	NA	SD	20111#100: Output from GWAS pipeline using Phesant derived variables from UKBiobank
ukb-b-10783	Illnesses of siblings: None of the above (group 2)	1	NA	Binary	368679	9851867	2018	MRC-IEU	Ben Elsworth	NA	Males and Females	European	309513	59166	NA	SD	20111#101: Output from GWAS pipeline using Phesant derived variables from UKBiobank
ukb-b-16943	Illnesses of siblings: Parkinson's disease	1	NA	Binary	361199	9851867	2018	MRC-IEU	Ben Elsworth	NA	Males and Females	European	2005	359194	NA	SD	20111#11: Output from GWAS pipeline using Phesant derived variables from UKBiobank
ukb-b-16522	Illnesses of siblings: Prostate cancer	1	NA	Binary	361394	9851867	2018	MRC-IEU	Ben Elsworth	NA	Males and Females	European	5952	355442	NA	SD	20111#13: Output from GWAS pipeline using Phesant derived variables from UKBiobank
ukb-b-14918	Illnesses of siblings: Severe depression	1	NA	Binary	362315	9851867	2018	MRC-IEU	Ben Elsworth	NA	Males and Females	European	26368	335947	NA	SD	20111#12: Output from GWAS pipeline using Phesant derived variables from UKBiobank
ukb-b-16334	Illnesses of siblings: Stroke	1	NA	Binary	361925	9851867	2018	MRC-IEU	Ben Elsworth	NA	Males and Females	European	12031	349894	NA	SD	20111#2: Output from GWAS pipeline using Phesant derived variables from UKBiobank
finn-a-ASTHMA_IMMUNECOMORB	Immune disease comorbidities	0	NA	Binary	94036	16152119	2020	NA	NA	NA	Males and Females	European	6633	47900	NA	NA	NA
finn-a-PULM_IMMUNECOMORB	Immune disease comorbidities	0	NA	Binary	94036	16152119	2020	NA	NA	NA	Males and Females	European	6633	50303	NA	NA	NA
finn-a-D3_IMMUDEF	Immunodeficiencies	0	NA	Binary	94036	16152119	2020	NA	NA	NA	Males and Females	European	214	96285	NA	NA	NA
finn-a-H8_CERUMEN	Impacted cerumen	0	NA	Binary	94036	16152119	2020	NA	NA	NA	Males and Females	European	290	94782	NA	NA	NA
finn-a-L12_IMPETIGO	Impetigo	0	NA	Binary	94036	16152119	2020	NA	NA	NA	Males and Females	European	235	92819	NA	NA	NA
finn-a-M13_IMPINGEMENT	Impingement syndrome of shoulder	0	NA	Binary	94036	16152119	2020	NA	NA	NA	Males and Females	European	2280	76986	NA	NA	NA
ukb-d-M13_IMPINGEMENT	Impingement syndrome of shoulder	0	NA	Binary	361194	11376069	2018	NA	Neale lab	NA	Males and Females	European	3420	357774	NA	NA	NA
finn-a-N14_IMPOTENCE	Impotence	0	NA	Binary	94036	16152119	2020	NA	NA	NA	Males and Females	European	194	33781	NA	NA	NA
finn-a-CD2_INSITU	In situ neoplasms	0	NA	Binary	94036	16152119	2020	NA	NA	NA	Males and Females	European	1052	95447	NA	NA	NA
finn-a-CD2_INSITU_EXALLC	In situ neoplasms (ICD C excluded)	0	NA	Binary	94036	16152119	2020	NA	NA	NA	Males and Females	European	1052	86577	NA	NA	NA
finn-a-L12_INFECT_SKIN	Infections of the skin and subcutaneous tissue	0	NA	Binary	94036	16152119	2020	NA	NA	NA	Males and Females	European	3680	92819	NA	NA	NA
finn-a-AB1_SEXUAL_TRANSMISSION	Infections with a predominantly sexual mode of transmission	0	NA	Binary	94036	16152119	2020	NA	NA	NA	Males and Females	European	2129	94370	NA	NA	NA
finn-a-IBD_INFECTIONS	Infections, IBD-co-morbidities	0	NA	Binary	94036	16152119	2020	NA	NA	NA	Males and Females	European	1500	32142	NA	NA	NA
finn-a-M13_INFBURSA	Infective bursitis	0	NA	Binary	94036	16152119	2020	NA	NA	NA	Males and Females	European	146	76986	NA	NA	NA
finn-a-L12_INFECT_DERM	Infective dermatitis	0	NA	Binary	94036	16152119	2020	NA	NA	NA	Males and Females	European	748	88760	NA	NA	NA
finn-a-K11_IBD	Inflammatory bowel disease	0	NA	Binary	94036	16152119	2020	NA	NA	NA	Males and Females	European	1897	94602	NA	NA	NA
finn-a-N14_INFCERVIX	Inflammatory disease of cervix uteri	0	NA	Binary	94036	16152119	2020	NA	NA	NA	Males and Females	European	449	49639	NA	NA	NA
finn-a-N14_INFLUTH	Inflammatory disease of uterus	0	NA	Binary	94036	16152119	2020	NA	NA	NA	Males and Females	European	812	49639	NA	NA	NA
finn-a-N14_FEMALEGENINF	Inflammatory diseases of female pelvic organs	0	NA	Binary	94036	16152119	2020	NA	NA	NA	Males and Females	European	4623	49639	NA	NA	NA
finn-a-N14_PROSTATITIS	Inflammatory diseases of prostate (prostatitis)	0	NA	Binary	94036	16152119	2020	NA	NA	NA	Males and Females	European	709	33781	NA	NA	NA
finn-a-G6_NEUINFL	Inflammatory diseases of the central nervous system	0	NA	Binary	94036	16152119	2020	NA	NA	NA	Males and Females	European	481	96018	NA	NA	NA
finn-a-N14_INFLAMMBREAST	Inflammatory disorders of breast	0	NA	Binary	94036	16152119	2020	NA	NA	NA	Males and Females	European	293	50767	NA	NA	NA
finn-a-J10_INFLUPNEU	Influenza and pneumonia	0	NA	Binary	94036	16152119	2020	NA	NA	NA	Males and Females	European	10858	85641	NA	NA	NA
ukb-b-16170	Ingredients in canned soup: Vegetables	1	NA	Binary	64949	9851867	2018	MRC-IEU	Ben Elsworth	NA	Males and Females	European	1774	63175	NA	SD	20108#5: Output from GWAS pipeline using Phesant derived variables from UKBiobank
ukb-b-1337	Ingredients in homemade soup: Vegetables	1	NA	Binary	64949	9851867	2018	MRC-IEU	Ben Elsworth	NA	Males and Females	European	2925	62024	NA	SD	20109#5: Output from GWAS pipeline using Phesant derived variables from UKBiobank
finn-a-L12_NAIL_INGROW	Ingrowing nail	0	NA	Binary	94036	16152119	2020	NA	NA	NA	Males and Females	European	299	93570	NA	NA	NA
finn-a-K11_HERING	Inguinal hernia	0	NA	Binary	94036	16152119	2020	NA	NA	NA	Males and Females	European	7106	85350	NA	NA	NA
finn-a-DM_EYE_OPER_VEGF_INJECT_VITR	Injection of anti-VEGF-antibody or corticosteroid or any drug into vitreous body	0	NA	Binary	94036	16152119	2020	NA	NA	NA	Males and Females	European	823	94909	NA	NA	NA
ukb-d-XIX_INJURY_POISON	Injury, poisoning and certain other consequences of external causes	0	NA	Binary	361194	13586589	2018	NA	Neale lab	NA	Males and Females	European	44796	316398	NA	NA	NA
finn-a-XIX_INJURY_POISON	Injury, poisoning and certain other consequences of external causes	0	NA	Binary	94036	16152119	2020	NA	NA	NA	Males and Females	European	47988	48511	NA	NA	NA
finn-a-INSULINS	Insulin medication	0	NA	Binary	94036	16152119	2020	NA	NA	NA	Males and Females	European	4618	83711	NA	NA	NA
finn-a-INSULIN_FAST	Insulin, fast-acting	0	NA	Binary	94036	16152119	2020	NA	NA	NA	Males and Females	European	3112	91881	NA	NA	NA
finn-a-INSULIN_SHORTFAST	Insulin, fast-acting or short human	0	NA	Binary	94036	16152119	2020	NA	NA	NA	Males and Females	European	3258	93241	NA	NA	NA
finn-a-INSULIN_INTER_AND_LONG	Insulin, intermediate and long-acting	0	NA	Binary	94036	16152119	2020	NA	NA	NA	Males and Females	European	4291	91881	NA	NA	NA
finn-a-INSULIN_SHORT_HUMAN	Insuling, fast-acting (human)	0	NA	Binary	94036	16152119	2020	NA	NA	NA	Males and Females	European	1900	91881	NA	NA	NA
ukb-b-14598	Intended management of patient (recoded): No overnight hospital stay	1	NA	Binary	455026	9851867	2018	MRC-IEU	Ben Elsworth	NA	Males and Females	European	217289	237737	NA	SD	41244#200: Output from GWAS pipeline using Phesant derived variables from UKBiobank
ukb-b-16597	Intended management of patient (recoded): One or more nights hospital stay	1	NA	Binary	451201	9851867	2018	MRC-IEU	Ben Elsworth	NA	Males and Females	European	120788	330413	NA	SD	41244#100: Output from GWAS pipeline using Phesant derived variables from UKBiobank
ukb-b-16944	Intended management of patient (recoded): Planned series of admissions with no overnight stay	1	NA	Binary	442494	9851867	2018	MRC-IEU	Ben Elsworth	NA	Males and Females	European	2512	439982	NA	SD	41244#400: Output from GWAS pipeline using Phesant derived variables from UKBiobank
finn-a-H7_INTERHETEROTRO	Intermittent heterotropia	0	NA	Binary	94036	16152119	2020	NA	NA	NA	Males and Females	European	254	93606	NA	NA	NA
finn-a-M13_KNEEDERANGEMENTS	Internar derangement of knee	0	NA	Binary	94036	16152119	2020	NA	NA	NA	Males and Females	European	8193	67688	NA	NA	NA
finn-a-ILD	Interstitial lung disease	0	NA	Binary	94036	16152119	2020	NA	NA	NA	Males and Females	European	546	88677	NA	NA	NA
finn-a-ILD_ENDPOINTS	Interstitial lung disease endpoints	0	NA	Binary	94036	16152119	2020	NA	NA	NA	Males and Females	European	7822	88677	NA	NA	NA
finn-a-K11_ADHE	Intestinal adhesions without obstruction	0	NA	Binary	94036	16152119	2020	NA	NA	NA	Males and Females	European	354	82769	NA	NA	NA
ukb-d-AB1_INTESTINAL_INFECTIONS	Intestinal infectious diseases	0	NA	Binary	361194	11777016	2018	NA	Neale lab	NA	Males and Females	European	4304	356890	NA	NA	NA
finn-a-AB1_INTESTINAL_INFECTIONS	Intestinal infectious diseases	0	NA	Binary	94036	16152119	2020	NA	NA	NA	Males and Females	European	8247	88252	NA	NA	NA
finn-a-K11_MALABSORB	Intestinal malabsorbtion	0	NA	Binary	94036	16152119	2020	NA	NA	NA	Males and Females	European	193	93690	NA	NA	NA
finn-a-I9_ICH	Intracerebral haemmorrhage	0	NA	Binary	94036	16152119	2020	NA	NA	NA	Males and Females	European	668	89806	NA	NA	NA
finn-a-G6_INTRACRATRAUMA	Intracranial trauma	0	NA	Binary	94036	16152119	2020	NA	NA	NA	Males and Females	European	5171	64290	NA	NA	NA
finn-a-INV_VENT	Invasive ventilation	0	NA	Binary	94036	16152119	2020	NA	NA	NA	Males and Females	European	184	94864	NA	NA	NA
ukb-b-14294	Invitation to complete online 24-hour recall dietary questionnaire, acceptance	1	NA	Binary	278328	9851867	2018	MRC-IEU	Ben Elsworth	NA	Males and Females	European	88770	189558	NA	SD	110001: Output from GWAS pipeline using Phesant derived variables from UKBiobank
ukb-b-14649	Invitation to physical activity study, acceptance	1	NA	Binary	221015	9851867	2018	MRC-IEU	Ben Elsworth	NA	Males and Females	European	98474	122541	NA	SD	110005: Output from GWAS pipeline using Phesant derived variables from UKBiobank
finn-a-H7_IRIDOCYCLITIS	Iridocyclitis	0	NA	Binary	94036	16152119	2020	NA	NA	NA	Males and Females	European	1430	92767	NA	NA	NA
ukb-d-D3_ANAEMIA_IRONDEF	Iron deficiency anaemia	0	NA	Binary	361194	11553874	2018	NA	Neale lab	NA	Males and Females	European	3786	357408	NA	NA	NA
finn-a-D3_ANAEMIA_IRONDEF	Iron deficiency anaemia	0	NA	Binary	94036	16152119	2020	NA	NA	NA	Males and Females	European	2031	93787	NA	NA	NA
finn-a-D3_ANAEMIA_IRONDEF_BLOODLOSS	Iron deficiency anaemia secondary to blood loss (chronic)	0	NA	Binary	94036	16152119	2020	NA	NA	NA	Males and Females	European	838	93787	NA	NA	NA
ukb-b-13745	Irritability	1	NA	Binary	442169	9851867	2018	MRC-IEU	Ben Elsworth	NA	Males and Females	European	125001	317168	NA	SD	1940: Output from GWAS pipeline using Phesant derived variables from UKBiobank
finn-a-K11_IBS	Irritable bowel syndrome	0	NA	Binary	94036	16152119	2020	NA	NA	NA	Males and Females	European	1806	82769	NA	NA	NA
ukb-d-I9_IHD	Ischaemic heart disease, wide definition	0	NA	Binary	361194	13586589	2018	NA	Neale lab	NA	Males and Females	European	20857	340337	NA	NA	NA
finn-a-I9_IHD	Ischaemic heart disease, wide definition	0	NA	Binary	94036	16152119	2020	NA	NA	NA	Males and Females	European	11139	85360	NA	NA	NA
ukb-d-I9_STR_EXH	Ischaemic Stroke, excluding all haemorrhages	0	NA	Binary	361194	11321390	2018	NA	Neale lab	NA	Males and Females	European	3314	357880	NA	NA	NA
finn-a-I9_STR_EXH	Ischaemic Stroke, excluding all haemorrhages	0	NA	Binary	94036	16152119	2020	NA	NA	NA	Males and Females	European	4026	90211	NA	NA	NA
finn-a-I9_ISCHHEART	Ischemic heart diseases	0	NA	Binary	94036	16152119	2020	NA	NA	NA	Males and Females	European	10739	85760	NA	NA	NA
finn-a-N14_ISOLPROTEINURIA	Isolated proteinuria with specified morphological lesion	0	NA	Binary	94036	16152119	2020	NA	NA	NA	Males and Females	European	145	94998	NA	NA	NA
ukb-d-22601_41223241	Job coding: accounts and wages clerk/assistant/supervisor, bookkeeper, cost or ledger clerk, audit assistant, budget officer, student loans officer, paymaster	0	NA	Binary	89866	10383547	2018	NA	Neale lab	NA	Males and Females	European	1922	87944	NA	NA	NA
ukb-d-22601_42153302	Job coding: all other personal assistants and secretaries	0	NA	Binary	89866	12158385	2018	NA	Neale lab	NA	Males and Females	European	5344	84522	NA	NA	NA
ukb-d-22601_11513250	Job coding: bank manager, bank section manager, building society manager, post/sub-post office manager	0	NA	Binary	89866	9720039	2018	NA	Neale lab	NA	Males and Females	European	1293	88573	NA	NA	NA
ukb-d-22601_61153104	Job coding: care assistant, home care assistant, residential social worker, home carer, nursing home assistant	0	NA	Binary	89866	9515490	2018	NA	Neale lab	NA	Males and Females	European	1143	88723	NA	NA	NA
ukb-d-22601_24213281	Job coding: chartered/certified accountant, auditor, company accountant, articled/audit clerk, official receiver	0	NA	Binary	89866	10380865	2018	NA	Neale lab	NA	Males and Females	European	1919	87947	NA	NA	NA
ukb-d-22601_21113020	Job coding: chemist (analytic, developmental, industrial, research)	0	NA	Binary	89866	9393776	2018	NA	Neale lab	NA	Males and Females	European	1061	88805	NA	NA	NA
ukb-d-22601_41123205	Job coding: civil service administrative officer or assistant or clerk, tax collector, prison service clerk, law courts clerk	0	NA	Binary	89866	11665703	2018	NA	Neale lab	NA	Males and Females	European	4036	85830	NA	NA	NA
ukb-d-22601_41113204	Job coding: civil service executive officer, revenue/tax executive or officer, fraud inspector or officer, job centre adviser	0	NA	Binary	89866	11378466	2018	NA	Neale lab	NA	Males and Females	European	3422	86444	NA	NA	NA
ukb-d-22601_24413202	Job coding: civil service senior manager outside the senior civil service (former grades 6 and 7)	0	NA	Binary	89866	9759994	2018	NA	Neale lab	NA	Males and Females	European	1324	88542	NA	NA	NA
ukb-d-22601_32313110	Job coding: community worker, day centre officer, youth leader, youth worker, parish worker, bail support officer	0	NA	Binary	89866	9360588	2018	NA	Neale lab	NA	Males and Females	European	1039	88827	NA	NA	NA
ukb-d-22601_41233254	Job coding: counter clerk, bank clerk, cashier, post office clerk	0	NA	Binary	89866	11178159	2018	NA	Neale lab	NA	Males and Females	European	3051	86815	NA	NA	NA
ukb-d-22601_72123243	Job coding: customer care adviser/officer/assistant, store guide, customer relations officer/representative	0	NA	Binary	89866	9614713	2018	NA	Neale lab	NA	Males and Females	European	1213	88653	NA	NA	NA
ukb-d-22601_11123211	Job coding: director or chief executive of private organisation/company, company chairman or president, general manager	0	NA	Binary	89866	10972749	2018	NA	Neale lab	NA	Males and Females	European	2711	87155	NA	NA	NA
ukb-d-22601_61243409	Job coding: educational assistant, classroom assistant, special needs helper	0	NA	Binary	89866	10663845	2018	NA	Neale lab	NA	Males and Females	European	2266	87600	NA	NA	NA
ukb-d-22601_35373270	Job coding: financial controller, accounting/audit technician, trust officer	0	NA	Binary	89866	9962337	2018	NA	Neale lab	NA	Males and Females	European	1495	88371	NA	NA	NA
ukb-d-22601_23123400	Job coding: further education teaching professional, college lecturer/professor	0	NA	Binary	89866	10810580	2018	NA	Neale lab	NA	Males and Females	European	2467	87399	NA	NA	NA
ukb-d-22601_41503307	Job coding: general office assistant/clerk, clerical officer, clerk-typist, office supervisor, press/newspaper corrector/reader	0	NA	Binary	89866	11631585	2018	NA	Neale lab	NA	Males and Females	European	3957	85909	NA	NA	NA
ukb-d-22601_23113399	Job coding: higher education teaching professional, university lecturer/professor (including college/university head/vice chancellor)	0	NA	Binary	89866	10920723	2018	NA	Neale lab	NA	Males and Females	European	2631	87235	NA	NA	NA
ukb-d-22601_11363057	Job coding: ict or it manager, systems/data processing manager, telecom manager	0	NA	Binary	89866	10071829	2018	NA	Neale lab	NA	Males and Females	European	1596	88270	NA	NA	NA
ukb-d-22601_31313060	Job coding: it operations technician, computer operator or technician, database manager, network or web technician, web master, systems administrator or officer	0	NA	Binary	89866	9408951	2018	NA	Neale lab	NA	Males and Females	European	1071	88795	NA	NA	NA
ukb-d-22601_21313058	Job coding: it strategy or planning professional, computer consultant, software consultant	0	NA	Binary	89866	10288688	2018	NA	Neale lab	NA	Males and Females	European	1817	88049	NA	NA	NA
ukb-d-22601_31113033	Job coding: laboratory technician, scientific assistant, cytology screener; hospital, medical or health technician	0	NA	Binary	89866	10582924	2018	NA	Neale lab	NA	Males and Females	European	2162	87704	NA	NA	NA
ukb-d-22601_41133206	Job coding: local government administrative officer or assistant or clerk	0	NA	Binary	89866	11949598	2018	NA	Neale lab	NA	Males and Females	European	4748	85118	NA	NA	NA
ukb-d-22601_35393271	Job coding: management information officer, conference/events co-ordinator/organiser, exhibition officer, work study engineer/officer/analyst, contract adviser/agent, election agent, business system analyst	0	NA	Binary	89866	10325155	2018	NA	Neale lab	NA	Males and Females	European	1857	88009	NA	NA	NA
ukb-d-22601_11222591	Job coding: manager in construction, clerk of works, site manager, contracts manager, highways manager	0	NA	Binary	89866	9344275	2018	NA	Neale lab	NA	Males and Females	European	1029	88837	NA	NA	NA
ukb-d-22601_21223040	Job coding: mechanical engineer, automobile engineer, aeronautical engineer, locomotive or marine engineer, welding engineer	0	NA	Binary	89866	9516971	2018	NA	Neale lab	NA	Males and Females	European	1144	88722	NA	NA	NA
ukb-d-22601_22113066	Job coding: medical doctor, general practitioner, hospital consultant	0	NA	Binary	89866	9930735	2018	NA	Neale lab	NA	Males and Females	European	1467	88399	NA	NA	NA
ukb-d-22601_33113434	Job coding: non-commissioned officers or other rank of armed forces	0	NA	Binary	89866	10453049	2018	NA	Neale lab	NA	Males and Females	European	2003	87863	NA	NA	NA
ukb-d-22601_32113072	Job coding: nurse (of any kind, at any level)	0	NA	Binary	89866	11991081	2018	NA	Neale lab	NA	Males and Females	European	4860	85006	NA	NA	NA
ukb-d-22601_61113073	Job coding: nursing auxiliary or assistant, steriliser of medical equipment, occupational therapy assistant, phlebotomist, physiotherapy assistant, ward orderly, ward assistant	0	NA	Binary	89866	9693305	2018	NA	Neale lab	NA	Males and Females	European	1272	88594	NA	NA	NA
ukb-d-22601_11523251	Job coding: office manager, account/payrolls manager, administration manager, litigation/solicitor's office manager	0	NA	Binary	89866	9452651	2018	NA	Neale lab	NA	Males and Females	European	1100	88766	NA	NA	NA
ukb-d-22601_41143216	Job coding: officer of ngo, trade union organiser/official, charity administrator, secretary of research or charity or political or professional or trade association or trade union	0	NA	Binary	89866	10030642	2018	NA	Neale lab	NA	Males and Females	European	1557	88309	NA	NA	NA
ukb-d-22601_92193312	Job coding: other general office clerical tasks including: office junior, office worker, photocopy/print room operator, office machinist	0	NA	Binary	89866	11298970	2018	NA	Neale lab	NA	Males and Females	European	3270	86596	NA	NA	NA
ukb-d-22601_31193034	Job coding: other science technician, materials technician, technical assistant, technical officer	0	NA	Binary	89866	9855760	2018	NA	Neale lab	NA	Males and Females	European	1402	88464	NA	NA	NA
ukb-d-22601_23193405	Job coding: other teaching professional including private tutor, tefl (teaching english as a foreign language) teacher; tutor at adult education centre, etc.	0	NA	Binary	89866	9840205	2018	NA	Neale lab	NA	Males and Females	European	1389	88477	NA	NA	NA
ukb-d-22601_41323255	Job coding: pensions and insurance clerk/administrator, claims handler	0	NA	Binary	89866	9663717	2018	NA	Neale lab	NA	Males and Females	European	1249	88617	NA	NA	NA
ukb-d-22601_11353225	Job coding: personnel, human resources, training or industrial relations manager/director, recruitment manager/director	0	NA	Binary	89866	9528837	2018	NA	Neale lab	NA	Males and Females	European	1152	88714	NA	NA	NA
ukb-d-22601_33123442	Job coding: police officer (sergeant or below)	0	NA	Binary	89866	9514023	2018	NA	Neale lab	NA	Males and Females	European	1142	88724	NA	NA	NA
ukb-d-22601_23153402	Job coding: primary /junior school teacher or teaching professional, nursery school teacher (including head teacher)	0	NA	Binary	89866	12226786	2018	NA	Neale lab	NA	Males and Females	European	5555	84311	NA	NA	NA
ukb-d-22601_35613203	Job coding: public service higher/senior executive officer, hospital administrator	0	NA	Binary	89866	11269657	2018	NA	Neale lab	NA	Males and Females	European	3215	86651	NA	NA	NA
ukb-d-22601_42163303	Job coding: receptionist, doctor's/dental receptionist	0	NA	Binary	89866	9434757	2018	NA	Neale lab	NA	Males and Females	European	1088	88778	NA	NA	NA
ukb-d-22601_23173422	Job coding: registrar or senior administrator of educational establishment, bursar, registrar, university administrator	0	NA	Binary	89866	9882592	2018	NA	Neale lab	NA	Males and Females	European	1425	88441	NA	NA	NA
ukb-d-22601_11373019	Job coding: research or laboratory manager	0	NA	Binary	89866	9496753	2018	NA	Neale lab	NA	Males and Females	European	1130	88736	NA	NA	NA
ukb-d-22601_11633322	Job coding: retail or wholesale shop manager, showroom manager	0	NA	Binary	89866	10142352	2018	NA	Neale lab	NA	Males and Females	European	1666	88200	NA	NA	NA
ukb-d-22601_71113328	Job coding: sales assistant, retail/shop assistant, counter assistant, sub post office assistant, takeaway food worker	0	NA	Binary	89866	11887059	2018	NA	Neale lab	NA	Males and Females	European	4580	85286	NA	NA	NA
ukb-d-22601_11323222	Job coding: sales or marketing manager/director, export/import manager, business development manager, advertising/commercial manager	0	NA	Binary	89866	10599697	2018	NA	Neale lab	NA	Males and Females	European	2183	87683	NA	NA	NA
ukb-d-22601_35423237	Job coding: sales or marketing representative, manufacturer's agent or representative or salesman/woman	0	NA	Binary	89866	9483797	2018	NA	Neale lab	NA	Males and Females	European	1121	88745	NA	NA	NA
ukb-d-22601_23213026	Job coding: scientific researcher, scientific officer, medical research associate, experimental officer	0	NA	Binary	89866	9547568	2018	NA	Neale lab	NA	Males and Females	European	1165	88701	NA	NA	NA
ukb-d-22601_23143401	Job coding: secondary school teacher or teaching professional (including head teacher)	0	NA	Binary	89866	12773585	2018	NA	Neale lab	NA	Males and Females	European	7556	82310	NA	NA	NA
ukb-d-22601_11133201	Job coding: senior official in local government including parish or town or county chief clerk, chief or superintendent rate collector, chief executive or director, councillor	0	NA	Binary	89866	9672586	2018	NA	Neale lab	NA	Males and Females	European	1256	88610	NA	NA	NA
ukb-d-22601_11143212	Job coding: senior official of special interest organisation including general manager or director or executive or general secretary of charity, or trade union/association or religious organisation	0	NA	Binary	89866	10515681	2018	NA	Neale lab	NA	Males and Females	European	2079	87787	NA	NA	NA
ukb-d-22601_12343321	Job coding: shopkeeper, shop owner, newsagent, wholesale/retail dealer	0	NA	Binary	89866	9878035	2018	NA	Neale lab	NA	Males and Females	European	1421	88445	NA	NA	NA
ukb-d-22601_24423108	Job coding: social worker, child care/protection officer, adoption officer, mental health officer, almoner, family case worker	0	NA	Binary	89866	9954298	2018	NA	Neale lab	NA	Males and Females	European	1488	88378	NA	NA	NA
ukb-d-22601_21323059	Job coding: software professional, analyst-programmer, computer programmer, software analyst or engineer, systems designer or programmer	0	NA	Binary	89866	11390348	2018	NA	Neale lab	NA	Males and Females	European	3445	86421	NA	NA	NA
ukb-d-22601_24113277	Job coding: solicitor, lawyer, barrister, judge, coroner, articled clerk, attorney, advocate, stipendiary magistrate, fiscal/crown prosecutor, sheriff (scottish courts), legal services recorder	0	NA	Binary	89866	9408951	2018	NA	Neale lab	NA	Males and Females	European	1071	88795	NA	NA	NA
ukb-d-22601_23163403	Job coding: special needs teaching professional (including head teacher)	0	NA	Binary	89866	9579748	2018	NA	Neale lab	NA	Males and Females	European	1188	88678	NA	NA	NA
ukb-d-22601_42173304	Job coding: typist, shorthand typist, transcriber, stenographer	0	NA	Binary	89866	11135035	2018	NA	Neale lab	NA	Males and Females	European	2975	86891	NA	NA	NA
ukb-d-22620_0	Job involved shift work: No	0	NA	Binary	91149	13567102	2018	NA	Neale lab	NA	Males and Females	European	86206	4943	NA	NA	NA
ukb-d-22620_1	Job involved shift work: Yes	0	NA	Binary	91149	13567102	2018	NA	Neale lab	NA	Males and Females	European	25698	65451	NA	NA	NA
ukb-d-22617_4122	Job SOC coding: Accounts and wages clerks, book-keepers, other financial clerks	0	NA	Binary	91149	10999368	2018	NA	Neale lab	NA	Males and Females	European	2752	88397	NA	NA	NA
ukb-d-22617_8139	Job SOC coding: Assemblers and routine operatives n.e.c.	0	NA	Binary	91149	9637882	2018	NA	Neale lab	NA	Males and Females	European	1230	89919	NA	NA	NA
ukb-d-22617_2112	Job SOC coding: Biological scientists and biochemists	0	NA	Binary	91149	9402868	2018	NA	Neale lab	NA	Males and Females	European	1067	90082	NA	NA	NA
ukb-d-22617_3539	Job SOC coding: Business and related associate professionals n.e.c.	0	NA	Binary	91149	10433954	2018	NA	Neale lab	NA	Males and Females	European	1980	89169	NA	NA	NA
ukb-d-22617_6115	Job SOC coding: Care assistants and home carers	0	NA	Binary	91149	9557574	2018	NA	Neale lab	NA	Males and Females	European	1172	89977	NA	NA	NA
ukb-d-22617_2421	Job SOC coding: Chartered and certified accountants	0	NA	Binary	91149	10427036	2018	NA	Neale lab	NA	Males and Females	European	1972	89177	NA	NA	NA
ukb-d-22617_2111	Job SOC coding: Chemists	0	NA	Binary	91149	9422840	2018	NA	Neale lab	NA	Males and Females	European	1080	90069	NA	NA	NA
ukb-d-22617_4112	Job SOC coding: Civil Service administrative officers and assistants	0	NA	Binary	91149	11688726	2018	NA	Neale lab	NA	Males and Females	European	4090	87059	NA	NA	NA
ukb-d-22617_4111	Job SOC coding: Civil Service executive officers	0	NA	Binary	91149	11405295	2018	NA	Neale lab	NA	Males and Females	European	3475	87674	NA	NA	NA
ukb-d-22617_4123	Job SOC coding: Counter clerks	0	NA	Binary	91149	11237757	2018	NA	Neale lab	NA	Males and Females	European	3157	87992	NA	NA	NA
ukb-d-22617_7212	Job SOC coding: Customer care occupations	0	NA	Binary	91149	10159407	2018	NA	Neale lab	NA	Males and Females	European	1683	89466	NA	NA	NA
ukb-d-22617_1112	Job SOC coding: Directors and chief executives of major organisations	0	NA	Binary	91149	11022242	2018	NA	Neale lab	NA	Males and Females	European	2789	88360	NA	NA	NA
ukb-d-22617_2313	Job SOC coding: Education officers, school inspectors	0	NA	Binary	91149	9422840	2018	NA	Neale lab	NA	Males and Females	European	1080	90069	NA	NA	NA
ukb-d-22617_6124	Job SOC coding: Educational assistants	0	NA	Binary	91149	10691845	2018	NA	Neale lab	NA	Males and Females	European	2304	88845	NA	NA	NA
ukb-d-22617_5241	Job SOC coding: Electricians, electrical fitters	0	NA	Binary	91149	9393712	2018	NA	Neale lab	NA	Males and Females	European	1061	90088	NA	NA	NA
ukb-d-22617_9219	Job SOC coding: Elementary office occupations n.e.c.	0	NA	Binary	91149	11336024	2018	NA	Neale lab	NA	Males and Females	European	3340	87809	NA	NA	NA
ukb-d-22617_3113	Job SOC coding: Engineering technicians	0	NA	Binary	91149	9366709	2018	NA	Neale lab	NA	Males and Females	European	1043	90106	NA	NA	NA
ukb-d-22617_4131	Job SOC coding: Filing and other records assistants/clerks	0	NA	Binary	91149	10008745	2018	NA	Neale lab	NA	Males and Females	European	1537	89612	NA	NA	NA
ukb-d-22617_3537	Job SOC coding: Financial and accounting technicians	0	NA	Binary	91149	9996830	2018	NA	Neale lab	NA	Males and Females	European	1526	89623	NA	NA	NA
ukb-d-22617_1151	Job SOC coding: Financial institution managers	0	NA	Binary	91149	9754890	2018	NA	Neale lab	NA	Males and Females	European	1320	89829	NA	NA	NA
ukb-d-22617_2312	Job SOC coding: Further education teaching professionals	0	NA	Binary	91149	10846784	2018	NA	Neale lab	NA	Males and Females	European	2520	88629	NA	NA	NA
ukb-d-22617_4150	Job SOC coding: General office assistants/clerks	0	NA	Binary	91149	11659379	2018	NA	Neale lab	NA	Males and Females	European	4022	87127	NA	NA	NA
ukb-d-22617_2311	Job SOC coding: Higher education teaching professionals	0	NA	Binary	91149	11205991	2018	NA	Neale lab	NA	Males and Females	European	3100	88049	NA	NA	NA
ukb-d-22617_1136	Job SOC coding: Information and communication technology managers	0	NA	Binary	91149	10110441	2018	NA	Neale lab	NA	Males and Females	European	1634	89515	NA	NA	NA
ukb-d-22617_3131	Job SOC coding: IT operations technicians	0	NA	Binary	91149	9455686	2018	NA	Neale lab	NA	Males and Females	European	1102	90047	NA	NA	NA
ukb-d-22617_2131	Job SOC coding: IT strategy and planning professionals	0	NA	Binary	91149	10330771	2018	NA	Neale lab	NA	Males and Females	European	1863	89286	NA	NA	NA
ukb-d-22617_3111	Job SOC coding: Laboratory technicians	0	NA	Binary	91149	10901509	2018	NA	Neale lab	NA	Males and Females	European	2602	88547	NA	NA	NA
ukb-d-22617_4212	Job SOC coding: Legal secretaries	0	NA	Binary	91149	9371263	2018	NA	Neale lab	NA	Males and Females	European	1046	90103	NA	NA	NA
ukb-d-22617_2451	Job SOC coding: Librarians	0	NA	Binary	91149	9662137	2018	NA	Neale lab	NA	Males and Females	European	1248	89901	NA	NA	NA
ukb-d-22617_4113	Job SOC coding: Local government clerical officers and assistants	0	NA	Binary	91149	11977514	2018	NA	Neale lab	NA	Males and Females	European	4823	86326	NA	NA	NA
ukb-d-22617_2423	Job SOC coding: Management consultants, actuaries, economists and statisticians	0	NA	Binary	91149	9407578	2018	NA	Neale lab	NA	Males and Females	European	1070	90079	NA	NA	NA
ukb-d-22617_1122	Job SOC coding: Managers in construction	0	NA	Binary	91149	9392269	2018	NA	Neale lab	NA	Males and Females	European	1060	90089	NA	NA	NA
ukb-d-22617_1132	Job SOC coding: Marketing and sales managers	0	NA	Binary	91149	10650978	2018	NA	Neale lab	NA	Males and Females	European	2249	88900	NA	NA	NA
ukb-d-22617_2122	Job SOC coding: Mechanical engineers	0	NA	Binary	91149	10070691	2018	NA	Neale lab	NA	Males and Females	European	1595	89554	NA	NA	NA
ukb-d-22617_2211	Job SOC coding: Medical practitioners	0	NA	Binary	91149	9967953	2018	NA	Neale lab	NA	Males and Females	European	1500	89649	NA	NA	NA
ukb-d-22617_4211	Job SOC coding: Medical secretaries	0	NA	Binary	91149	9362160	2018	NA	Neale lab	NA	Males and Females	European	1040	90109	NA	NA	NA
ukb-d-22617_5223	Job SOC coding: Metal working production and maintenance fitters	0	NA	Binary	91149	9607539	2018	NA	Neale lab	NA	Males and Females	European	1208	89941	NA	NA	NA
ukb-d-22617_3311	Job SOC coding: NCOs and other ranks	0	NA	Binary	91149	10498352	2018	NA	Neale lab	NA	Males and Females	European	2058	89091	NA	NA	NA
ukb-d-22617_3211	Job SOC coding: Nurses	0	NA	Binary	91149	12062678	2018	NA	Neale lab	NA	Males and Females	European	5062	86087	NA	NA	NA
ukb-d-22617_6111	Job SOC coding: Nursing auxiliaries and assistants	0	NA	Binary	91149	9730612	2018	NA	Neale lab	NA	Males and Females	European	1301	89848	NA	NA	NA
ukb-d-22617_1152	Job SOC coding: Office managers	0	NA	Binary	91149	9483745	2018	NA	Neale lab	NA	Males and Females	European	1121	90028	NA	NA	NA
ukb-d-22617_4114	Job SOC coding: Officers of non-governmental organisations	0	NA	Binary	91149	10053760	2018	NA	Neale lab	NA	Males and Females	European	1579	89570	NA	NA	NA
ukb-d-22617_9149	Job SOC coding: Other goods handling and storage occupations n.e.c.	0	NA	Binary	91149	9702344	2018	NA	Neale lab	NA	Males and Females	European	1279	89870	NA	NA	NA
ukb-d-22617_4132	Job SOC coding: Pensions and insurance clerks	0	NA	Binary	91149	9690722	2018	NA	Neale lab	NA	Males and Females	European	1270	89879	NA	NA	NA
ukb-d-22617_4215	Job SOC coding: Personal assistants and other secretaries	0	NA	Binary	91149	12182475	2018	NA	Neale lab	NA	Males and Females	European	5418	85731	NA	NA	NA
ukb-d-22617_3562	Job SOC coding: Personnel and industrial relations officers	0	NA	Binary	91149	9906861	2018	NA	Neale lab	NA	Males and Females	European	1446	89703	NA	NA	NA
ukb-d-22617_1135	Job SOC coding: Personnel, training and industrial relations managers	0	NA	Binary	91149	9553171	2018	NA	Neale lab	NA	Males and Females	European	1169	89980	NA	NA	NA
ukb-d-22617_3312	Job SOC coding: Police officers (sergeant and below)	0	NA	Binary	91149	9551788	2018	NA	Neale lab	NA	Males and Females	European	1168	89981	NA	NA	NA
ukb-d-22617_2315	Job SOC coding: Primary and nursery education teaching professionals	0	NA	Binary	91149	12248548	2018	NA	Neale lab	NA	Males and Females	European	5625	85524	NA	NA	NA
ukb-d-22617_2441	Job SOC coding: Public service administrative professionals	0	NA	Binary	91149	9795102	2018	NA	Neale lab	NA	Males and Females	European	1352	89797	NA	NA	NA
ukb-d-22617_3561	Job SOC coding: Public service associate professionals	0	NA	Binary	91149	11304675	2018	NA	Neale lab	NA	Males and Females	European	3281	87868	NA	NA	NA
ukb-d-22617_4216	Job SOC coding: Receptionists	0	NA	Binary	91149	9861189	2018	NA	Neale lab	NA	Males and Females	European	1407	89742	NA	NA	NA
ukb-d-22617_2317	Job SOC coding: Registrars and senior administrators of educational establishments	0	NA	Binary	91149	9908026	2018	NA	Neale lab	NA	Males and Females	European	1447	89702	NA	NA	NA
ukb-d-22617_1137	Job SOC coding: Research and development managers	0	NA	Binary	91149	9698530	2018	NA	Neale lab	NA	Males and Females	European	1276	89873	NA	NA	NA
ukb-d-22617_2329	Job SOC coding: Researchers n.e.c.	0	NA	Binary	91149	9342851	2018	NA	Neale lab	NA	Males and Females	European	1028	90121	NA	NA	NA
ukb-d-22617_1163	Job SOC coding: Retail and wholesale managers	0	NA	Binary	91149	10227568	2018	NA	Neale lab	NA	Males and Females	European	1753	89396	NA	NA	NA
ukb-d-22617_7111	Job SOC coding: Sales and retail assistants	0	NA	Binary	91149	11921480	2018	NA	Neale lab	NA	Males and Females	European	4672	86477	NA	NA	NA
ukb-d-22617_7129	Job SOC coding: Sales related occupations n.e.c.	0	NA	Binary	91149	9419975	2018	NA	Neale lab	NA	Males and Females	European	1078	90071	NA	NA	NA
ukb-d-22617_3542	Job SOC coding: Sales representatives	0	NA	Binary	91149	9514062	2018	NA	Neale lab	NA	Males and Females	European	1142	90007	NA	NA	NA
ukb-d-22617_4213	Job SOC coding: School secretaries	0	NA	Binary	91149	9654172	2018	NA	Neale lab	NA	Males and Females	European	1242	89907	NA	NA	NA
ukb-d-22617_3119	Job SOC coding: Science and engineering technicians n.e.c.	0	NA	Binary	91149	10465621	2018	NA	Neale lab	NA	Males and Females	European	2018	89131	NA	NA	NA
ukb-d-22617_2321	Job SOC coding: Scientific researchers	0	NA	Binary	91149	9582642	2018	NA	Neale lab	NA	Males and Females	European	1190	89959	NA	NA	NA
ukb-d-22617_2314	Job SOC coding: Secondary education teaching professionals	0	NA	Binary	91149	12803432	2018	NA	Neale lab	NA	Males and Females	European	7682	83467	NA	NA	NA
ukb-d-22617_1113	Job SOC coding: Senior officials in local government	0	NA	Binary	91149	9699794	2018	NA	Neale lab	NA	Males and Females	European	1277	89872	NA	NA	NA
ukb-d-22617_1114	Job SOC coding: Senior officials of special interest organisations	0	NA	Binary	91149	10553212	2018	NA	Neale lab	NA	Males and Females	European	2125	89024	NA	NA	NA
ukb-d-22617_1234	Job SOC coding: Shopkeepers and wholesale/retail dealers	0	NA	Binary	91149	9930458	2018	NA	Neale lab	NA	Males and Females	European	1467	89682	NA	NA	NA
ukb-d-22617_2442	Job SOC coding: Social workers	0	NA	Binary	91149	9978111	2018	NA	Neale lab	NA	Males and Females	European	1509	89640	NA	NA	NA
ukb-d-22617_2132	Job SOC coding: Software professionals	0	NA	Binary	91149	11426983	2018	NA	Neale lab	NA	Males and Females	European	3519	87630	NA	NA	NA
ukb-d-22617_2411	Job SOC coding: Solicitors and lawyers, judges and coroners	0	NA	Binary	91149	9434719	2018	NA	Neale lab	NA	Males and Females	European	1088	90061	NA	NA	NA
ukb-d-22617_2316	Job SOC coding: Special needs education teaching professionals	0	NA	Binary	91149	9608933	2018	NA	Neale lab	NA	Males and Females	European	1209	89940	NA	NA	NA
ukb-d-22617_2319	Job SOC coding: Teaching professionals n.e.c.	0	NA	Binary	91149	10103438	2018	NA	Neale lab	NA	Males and Females	European	1627	89522	NA	NA	NA
ukb-d-22617_4217	Job SOC coding: Typists	0	NA	Binary	91149	11160690	2018	NA	Neale lab	NA	Males and Females	European	3020	88129	NA	NA	NA
ukb-d-22617_3563	Job SOC coding: Vocational and industrial trainers and instructors	0	NA	Binary	91149	9321280	2018	NA	Neale lab	NA	Males and Females	European	1015	90134	NA	NA	NA
ukb-d-22617_3231	Job SOC coding: Youth and community workers	0	NA	Binary	91149	9395117	2018	NA	Neale lab	NA	Males and Females	European	1062	90087	NA	NA	NA
finn-a-JUVEN_ARTHR	Juvenile arthritis (FINNGEN)	0	NA	Binary	94036	16152119	2020	NA	NA	NA	Males and Females	European	247	79075	NA	NA	NA
finn-a-JUVEN_ARTHR_COMORB	Juvenile arthritis related co-morbidities	0	NA	Binary	94036	16152119	2020	NA	NA	NA	Males and Females	European	1430	53332	NA	NA	NA
finn-a-M13_JUVOSTEOCHONRHIP	Juvenile osteochondrosis	0	NA	Binary	94036	16152119	2020	NA	NA	NA	Males and Females	European	193	95119	NA	NA	NA
finn-a-F5_KELAMENT	Kela-cod for severe mental illness	0	NA	Binary	94036	16152119	2020	NA	NA	NA	Males and Females	European	5935	90236	NA	NA	NA
finn-a-H7_KERATITIS	Keratitis	0	NA	Binary	94036	16152119	2020	NA	NA	NA	Males and Females	European	1871	92767	NA	NA	NA
finn-a-H7_KERATITISINOTH	Keratitis and keratoconjunctivitis in other diseases classified elsewhere	0	NA	Binary	94036	16152119	2020	NA	NA	NA	Males and Females	European	194	92767	NA	NA	NA
ukb-d-20423	Keyed up or on edge during worst period of anxiety	0	NA	Binary	34806	13541796	2018	NA	Neale lab	NA	Males and Females	European	27777	7029	NA	NA	NA
finn-a-KIDNEYTRANSP	Kidney transplant status	0	NA	Binary	94036	16152119	2020	NA	NA	NA	Males and Females	European	153	96346	NA	NA	NA
finn-a-KIDNEY_TRANSPLANT	Kidney transplantation	0	NA	Binary	94036	16152119	2020	NA	NA	NA	Males and Females	European	153	96346	NA	NA	NA
ukb-b-8906	Knee pain for 3+ months	1	NA	Binary	97889	9851867	2018	MRC-IEU	Ben Elsworth	NA	Males and Females	European	76910	20979	NA	SD	3773: Output from GWAS pipeline using Phesant derived variables from UKBiobank
finn-a-E4_LACTOSEINT	Lactose intolerance	0	NA	Binary	94036	16152119	2020	NA	NA	NA	Males and Females	European	159	88782	NA	NA	NA
finn-a-E4_LACTONAS	Lactose intolerance, other/unspecified	0	NA	Binary	94036	16152119	2020	NA	NA	NA	Males and Females	European	148	96340	NA	NA	NA
finn-a-COPD_LATER	Later onset COPD	0	NA	Binary	94036	16152119	2020	NA	NA	NA	Males and Females	European	1030	67360	NA	NA	NA
finn-a-COPD_LATER_EXMORE	Later onset COPD	0	NA	Binary	94036	16152119	2020	NA	NA	NA	Males and Females	European	1030	67360	NA	NA	NA
finn-a-M13_LATERALEPICOND	Lateral epicondylitis	0	NA	Binary	94036	16152119	2020	NA	NA	NA	Males and Females	European	1000	76986	NA	NA	NA
finn-a-I9_LBBB	Left bundle-branch block	0	NA	Binary	94036	16152119	2020	NA	NA	NA	Males and Females	European	255	75137	NA	NA	NA
ukb-b-9054	Leg pain in calf/calves	1	NA	Binary	32862	9851867	2018	MRC-IEU	Ben Elsworth	NA	Males and Females	European	11019	21843	NA	SD	5463: Output from GWAS pipeline using Phesant derived variables from UKBiobank
ukb-b-10387	Leg pain on walking	1	NA	Binary	151553	9851867	2018	MRC-IEU	Ben Elsworth	NA	Males and Females	European	33509	118044	NA	SD	4728: Output from GWAS pipeline using Phesant derived variables from UKBiobank
ukb-b-3665	Leg pain on walking : effect of standing still	1	NA	Binary	28933	9851867	2018	MRC-IEU	Ben Elsworth	NA	Males and Females	European	17548	11385	NA	SD	5518: Output from GWAS pipeline using Phesant derived variables from UKBiobank
ukb-b-4361	Leg pain when standing still or sitting	1	NA	Binary	32378	9851867	2018	MRC-IEU	Ben Elsworth	NA	Males and Females	European	20743	11635	NA	SD	5452: Output from GWAS pipeline using Phesant derived variables from UKBiobank
ukb-b-17291	Leg pain when walking ever disappears while walking	1	NA	Binary	17861	9851867	2018	MRC-IEU	Ben Elsworth	NA	Males and Females	European	6300	11561	NA	SD	5496: Output from GWAS pipeline using Phesant derived variables from UKBiobank
ukb-b-12864	Leg pain when walking normally	1	NA	Binary	32561	9851867	2018	MRC-IEU	Ben Elsworth	NA	Males and Females	European	18474	14087	NA	SD	5485: Output from GWAS pipeline using Phesant derived variables from UKBiobank
ukb-b-3196	Leg pain when walking uphill or hurrying	1	NA	Binary	32192	9851867	2018	MRC-IEU	Ben Elsworth	NA	Males and Females	European	22350	9842	NA	SD	5474: Output from GWAS pipeline using Phesant derived variables from UKBiobank
finn-a-CD2_BENIGN_LEIOMYOMA_UTERI	Leiomyoma of uterus	0	NA	Binary	94036	16152119	2020	NA	NA	NA	Males and Females	European	7869	46393	NA	NA	NA
finn-a-CD2_BENIGN_LEIOMYOMA_UTERI_EXALLC	Leiomyoma of uterus (ICD C excluded)	0	NA	Binary	94036	16152119	2020	NA	NA	NA	Males and Females	European	7869	80325	NA	NA	NA
ukb-b-1553	Leisure/social activities: Adult education class	1	NA	Binary	461369	9851867	2018	MRC-IEU	Ben Elsworth	NA	Males and Females	European	33398	427971	NA	SD	6160#4: Output from GWAS pipeline using Phesant derived variables from UKBiobank
ukb-b-5076	Leisure/social activities: None of the above	1	NA	Binary	461369	9851867	2018	MRC-IEU	Ben Elsworth	NA	Males and Females	European	140035	321334	NA	SD	6160#100: Output from GWAS pipeline using Phesant derived variables from UKBiobank
ukb-b-4077	Leisure/social activities: Other group activity	1	NA	Binary	461369	9851867	2018	MRC-IEU	Ben Elsworth	NA	Males and Females	European	101824	359545	NA	SD	6160#5: Output from GWAS pipeline using Phesant derived variables from UKBiobank
ukb-b-4171	Leisure/social activities: Pub or social club	1	NA	Binary	461369	9851867	2018	MRC-IEU	Ben Elsworth	NA	Males and Females	European	125532	335837	NA	SD	6160#2: Output from GWAS pipeline using Phesant derived variables from UKBiobank
ukb-b-4667	Leisure/social activities: Religious group	1	NA	Binary	461369	9851867	2018	MRC-IEU	Ben Elsworth	NA	Males and Females	European	67877	393492	NA	SD	6160#3: Output from GWAS pipeline using Phesant derived variables from UKBiobank
ukb-b-4000	Leisure/social activities: Sports club or gym	1	NA	Binary	461369	9851867	2018	MRC-IEU	Ben Elsworth	NA	Males and Females	European	138494	322875	NA	SD	6160#1: Output from GWAS pipeline using Phesant derived variables from UKBiobank
ukb-b-7587	Length of longest manic/irritable episode	1	NA	Binary	25247	9851867	2018	MRC-IEU	Ben Elsworth	NA	Males and Females	European	5318	19929	NA	SD	5663: Output from GWAS pipeline using Phesant derived variables from UKBiobank
finn-a-G6_FEMLAPOP	Lesion of lateral popliteal nerve	0	NA	Binary	94036	16152119	2020	NA	NA	NA	Males and Females	European	241	86854	NA	NA	NA
finn-a-G6_PLANTAR	Lesion of plantar nerve	0	NA	Binary	94036	16152119	2020	NA	NA	NA	Males and Females	European	456	86854	NA	NA	NA
finn-a-G6_RADLES	Lesion of radial nerve	0	NA	Binary	94036	16152119	2020	NA	NA	NA	Males and Females	European	231	86854	NA	NA	NA
finn-a-G6_SCIALE	Lesion of sciatic nerve	0	NA	Binary	94036	16152119	2020	NA	NA	NA	Males and Females	European	350	86854	NA	NA	NA
finn-a-G6_ULLNLE	Lesion of ulnar nerve	0	NA	Binary	94036	16152119	2020	NA	NA	NA	Males and Females	European	764	86854	NA	NA	NA
finn-a-L12_LICHENPLANUS	Lichen planus	0	NA	Binary	94036	16152119	2020	NA	NA	NA	Males and Females	European	760	93959	NA	NA	NA
finn-a-L12_LICHENSCLERATROPH	Lichen sclerosus et atrophicus	0	NA	Binary	94036	16152119	2020	NA	NA	NA	Males and Females	European	341	92525	NA	NA	NA
finn-a-L12_LICHENSIMPLEX	Lichen simplex chronicus	0	NA	Binary	94036	16152119	2020	NA	NA	NA	Males and Females	European	178	88760	NA	NA	NA
finn-a-L12_LICHSIMPANDPRURIGO	Lichen simplex chronicus and prurigo	0	NA	Binary	94036	16152119	2020	NA	NA	NA	Males and Females	European	322	88760	NA	NA	NA
ukb-b-8133	Light smokers, at least 100 smokes in lifetime	1	NA	Binary	123894	9851867	2018	MRC-IEU	Ben Elsworth	NA	Males and Females	European	57021	66873	NA	SD	2644: Output from GWAS pipeline using Phesant derived variables from UKBiobank
ukb-b-9744	Liquid used to make porridge: Porridge with milk	1	NA	Binary	64949	9851867	2018	MRC-IEU	Ben Elsworth	NA	Males and Females	European	6469	58480	NA	SD	20105#79: Output from GWAS pipeline using Phesant derived variables from UKBiobank
ukb-b-7503	Liquid used to make porridge: Porridge with water	1	NA	Binary	64949	9851867	2018	MRC-IEU	Ben Elsworth	NA	Males and Females	European	3730	61219	NA	SD	20105#78: Output from GWAS pipeline using Phesant derived variables from UKBiobank
ukb-b-8476	Loneliness, isolation	1	NA	Binary	455364	9851867	2018	MRC-IEU	Ben Elsworth	NA	Males and Females	European	82436	372928	NA	SD	2020: Output from GWAS pipeline using Phesant derived variables from UKBiobank
ukb-b-13764	Long-standing illness, disability or infirmity	1	NA	Binary	451893	9851867	2018	MRC-IEU	Ben Elsworth	NA	Males and Females	European	147104	304789	NA	SD	2188: Output from GWAS pipeline using Phesant derived variables from UKBiobank
finn-a-M13_LOOSEJOINT	Loose body in joint	0	NA	Binary	94036	16152119	2020	NA	NA	NA	Males and Females	European	152	67688	NA	NA	NA
ukb-d-M13_LOWBACKPAIN	Low back pain	0	NA	Binary	361194	12184069	2018	NA	Neale lab	NA	Males and Females	European	5423	355771	NA	NA	NA
finn-a-M13_LOWBACKPAIN	Low back pain	0	NA	Binary	94036	16152119	2020	NA	NA	NA	Males and Females	European	4863	74589	NA	NA	NA
finn-a-G6_LSROOT	Lumbosacral root disorders, not elsewhere classified	0	NA	Binary	94036	16152119	2020	NA	NA	NA	Males and Females	European	146	86854	NA	NA	NA
ukb-d-LUNG_CANCER_MESOT	Lung cancer and mesothelioma	0	NA	Binary	361194	10455414	2018	NA	Neale lab	NA	Males and Females	European	2007	359187	NA	NA	NA
finn-a-LUNG_CANCER	Lung cancer and mesothelioma	0	NA	Binary	94036	16152119	2020	NA	NA	NA	Males and Females	European	673	66218	NA	NA	NA
finn-a-LUNG_CANCER_MESOT	Lung cancer and mesothelioma	0	NA	Binary	94036	16152119	2020	NA	NA	NA	Males and Females	European	673	95826	NA	NA	NA
finn-a-J10_EXTERLUNG	Lung diseases due to external agents	0	NA	Binary	94036	16152119	2020	NA	NA	NA	Males and Females	European	720	95779	NA	NA	NA
finn-a-LUNG_TRANSPLANTATION	Lung transplantation	0	NA	Binary	94036	16152119	2020	NA	NA	NA	Males and Females	European	323	96176	NA	NA	NA
finn-a-CD2_LYMPHOID_LEUKAEMIA	Lymphoid leukaemia	0	NA	Binary	94036	16152119	2020	NA	NA	NA	Males and Females	European	198	96301	NA	NA	NA
finn-a-CD2_LYMPHOID_LEUKAEMIA_EXALLC	Lymphoid leukaemia (ICD C excluded)	0	NA	Binary	94036	16152119	2020	NA	NA	NA	Males and Females	European	198	87061	NA	NA	NA
ukb-d-C_LYMPHOMA	Lymphomas	0	NA	Binary	361194	10226672	2018	NA	Neale lab	NA	Males and Females	European	1752	359442	NA	NA	NA
finn-a-MACULAR_HOLE	Macular hole	0	NA	Binary	94036	16152119	2020	NA	NA	NA	Males and Females	European	183	90618	NA	NA	NA
finn-a-MACULAR_PUCKER	Macular pucker	0	NA	Binary	94036	16152119	2020	NA	NA	NA	Males and Females	European	361	90618	NA	NA	NA
ukb-b-1350	Main speciality of consultant (recoded): Accident and emergency (A&E)	1	NA	Binary	461251	9851867	2018	MRC-IEU	Ben Elsworth	NA	Males and Females	European	16509	444742	NA	SD	41245#1010: Output from GWAS pipeline using Phesant derived variables from UKBiobank
ukb-b-15085	Main speciality of consultant (recoded): Adult mental illness	1	NA	Binary	461145	9851867	2018	MRC-IEU	Ben Elsworth	NA	Males and Females	European	2801	458344	NA	SD	41245#1020: Output from GWAS pipeline using Phesant derived variables from UKBiobank
ukb-b-19023	Main speciality of consultant (recoded): Anaesthetics	1	NA	Binary	461496	9851867	2018	MRC-IEU	Ben Elsworth	NA	Males and Females	European	5479	456017	NA	SD	41245#1040: Output from GWAS pipeline using Phesant derived variables from UKBiobank
ukb-b-16376	Main speciality of consultant (recoded): Cardiology	1	NA	Binary	461416	9851867	2018	MRC-IEU	Ben Elsworth	NA	Males and Females	European	24551	436865	NA	SD	41245#1070: Output from GWAS pipeline using Phesant derived variables from UKBiobank
ukb-b-11247	Main speciality of consultant (recoded): Cardiothoracic surgery	1	NA	Binary	461137	9851867	2018	MRC-IEU	Ben Elsworth	NA	Males and Females	European	5378	455759	NA	SD	41245#1080: Output from GWAS pipeline using Phesant derived variables from UKBiobank
ukb-b-73	Main speciality of consultant (recoded): Clinical haematology	1	NA	Binary	461112	9851867	2018	MRC-IEU	Ben Elsworth	NA	Males and Females	European	3432	457680	NA	SD	41245#1130: Output from GWAS pipeline using Phesant derived variables from UKBiobank
ukb-b-13217	Main speciality of consultant (recoded): Clinical oncology/ Radiotherapy	1	NA	Binary	461132	9851867	2018	MRC-IEU	Ben Elsworth	NA	Males and Females	European	4596	456536	NA	SD	41245#1160: Output from GWAS pipeline using Phesant derived variables from UKBiobank
ukb-b-1852	Main speciality of consultant (recoded): Dermatology	1	NA	Binary	461170	9851867	2018	MRC-IEU	Ben Elsworth	NA	Males and Females	European	8766	452404	NA	SD	41245#1230: Output from GWAS pipeline using Phesant derived variables from UKBiobank
ukb-b-18820	Main speciality of consultant (recoded): Ear, nose and throat (ENT)	1	NA	Binary	461270	9851867	2018	MRC-IEU	Ben Elsworth	NA	Males and Females	European	21341	439929	NA	SD	41245#1240: Output from GWAS pipeline using Phesant derived variables from UKBiobank
ukb-b-3241	Main speciality of consultant (recoded): Endocrinology	1	NA	Binary	461106	9851867	2018	MRC-IEU	Ben Elsworth	NA	Males and Females	European	1929	459177	NA	SD	41245#1250: Output from GWAS pipeline using Phesant derived variables from UKBiobank
ukb-b-8633	Main speciality of consultant (recoded): Gastroenterology	1	NA	Binary	461504	9851867	2018	MRC-IEU	Ben Elsworth	NA	Males and Females	European	38993	422511	NA	SD	41245#1280: Output from GWAS pipeline using Phesant derived variables from UKBiobank
ukb-b-15784	Main speciality of consultant (recoded): General medicine	1	NA	Binary	461894	9851867	2018	MRC-IEU	Ben Elsworth	NA	Males and Females	European	81135	380759	NA	SD	41245#1310: Output from GWAS pipeline using Phesant derived variables from UKBiobank
ukb-b-6541	Main speciality of consultant (recoded): General surgery	1	NA	Binary	461949	9851867	2018	MRC-IEU	Ben Elsworth	NA	Males and Females	European	108626	353323	NA	SD	41245#1350: Output from GWAS pipeline using Phesant derived variables from UKBiobank
ukb-b-19398	Main speciality of consultant (recoded): Geriatric medicine	1	NA	Binary	461173	9851867	2018	MRC-IEU	Ben Elsworth	NA	Males and Females	European	8407	452766	NA	SD	41245#1370: Output from GWAS pipeline using Phesant derived variables from UKBiobank
ukb-b-16369	Main speciality of consultant (recoded): Gynaecology	1	NA	Binary	461449	9851867	2018	MRC-IEU	Ben Elsworth	NA	Males and Females	European	52200	409249	NA	SD	41245#1380: Output from GWAS pipeline using Phesant derived variables from UKBiobank
ukb-b-7375	Main speciality of consultant (recoded): Infectious diseases	1	NA	Binary	461107	9851867	2018	MRC-IEU	Ben Elsworth	NA	Males and Females	European	2314	458793	NA	SD	41245#1420: Output from GWAS pipeline using Phesant derived variables from UKBiobank
ukb-b-19304	Main speciality of consultant (recoded): Medical oncology	1	NA	Binary	461101	9851867	2018	MRC-IEU	Ben Elsworth	NA	Males and Females	European	2768	458333	NA	SD	41245#1460: Output from GWAS pipeline using Phesant derived variables from UKBiobank
ukb-b-15430	Main speciality of consultant (recoded): Midwifery	1	NA	Binary	461089	9851867	2018	MRC-IEU	Ben Elsworth	NA	Males and Females	European	1688	459401	NA	SD	41245#1480: Output from GWAS pipeline using Phesant derived variables from UKBiobank
ukb-b-9513	Main speciality of consultant (recoded): Nephrology	1	NA	Binary	461118	9851867	2018	MRC-IEU	Ben Elsworth	NA	Males and Females	European	1939	459179	NA	SD	41245#1490: Output from GWAS pipeline using Phesant derived variables from UKBiobank
ukb-b-4394	Main speciality of consultant (recoded): Neurology	1	NA	Binary	461150	9851867	2018	MRC-IEU	Ben Elsworth	NA	Males and Females	European	5036	456114	NA	SD	41245#1500: Output from GWAS pipeline using Phesant derived variables from UKBiobank
ukb-b-17965	Main speciality of consultant (recoded): Neurosurgery	1	NA	Binary	461193	9851867	2018	MRC-IEU	Ben Elsworth	NA	Males and Females	European	5800	455393	NA	SD	41245#1520: Output from GWAS pipeline using Phesant derived variables from UKBiobank
ukb-b-19115	Main speciality of consultant (recoded): Obstetrics	1	NA	Binary	461171	9851867	2018	MRC-IEU	Ben Elsworth	NA	Males and Females	European	14743	446428	NA	SD	41245#1560: Output from GWAS pipeline using Phesant derived variables from UKBiobank
ukb-b-9038	Main speciality of consultant (recoded): Ophthalmology	1	NA	Binary	461230	9851867	2018	MRC-IEU	Ben Elsworth	NA	Males and Females	European	22306	438924	NA	SD	41245#1610: Output from GWAS pipeline using Phesant derived variables from UKBiobank
ukb-b-16040	Main speciality of consultant (recoded): Oral and maxillo facial surgery	1	NA	Binary	461095	9851867	2018	MRC-IEU	Ben Elsworth	NA	Males and Females	European	1195	459900	NA	SD	41245#1620: Output from GWAS pipeline using Phesant derived variables from UKBiobank
ukb-b-13106	Main speciality of consultant (recoded): Oral surgery	1	NA	Binary	461171	9851867	2018	MRC-IEU	Ben Elsworth	NA	Males and Females	European	11656	449515	NA	SD	41245#1630: Output from GWAS pipeline using Phesant derived variables from UKBiobank
ukb-b-8938	Main speciality of consultant (recoded): Plastic surgery	1	NA	Binary	461218	9851867	2018	MRC-IEU	Ben Elsworth	NA	Males and Females	European	19010	442208	NA	SD	41245#1730: Output from GWAS pipeline using Phesant derived variables from UKBiobank
ukb-b-3389	Main speciality of consultant (recoded): Radiology	1	NA	Binary	461110	9851867	2018	MRC-IEU	Ben Elsworth	NA	Males and Females	European	1343	459767	NA	SD	41245#1780: Output from GWAS pipeline using Phesant derived variables from UKBiobank
ukb-b-16862	Main speciality of consultant (recoded): Respiratory medicine	1	NA	Binary	461173	9851867	2018	MRC-IEU	Ben Elsworth	NA	Males and Females	European	7643	453530	NA	SD	41245#1800: Output from GWAS pipeline using Phesant derived variables from UKBiobank
ukb-b-7763	Main speciality of consultant (recoded): Rheumatology	1	NA	Binary	461154	9851867	2018	MRC-IEU	Ben Elsworth	NA	Males and Females	European	3899	457255	NA	SD	41245#1820: Output from GWAS pipeline using Phesant derived variables from UKBiobank
ukb-b-16399	Main speciality of consultant (recoded): Trauma and orthopaedics	1	NA	Binary	461797	9851867	2018	MRC-IEU	Ben Elsworth	NA	Males and Females	European	70656	391141	NA	SD	41245#1840: Output from GWAS pipeline using Phesant derived variables from UKBiobank
ukb-b-16019	Main speciality of consultant (recoded): Urology	1	NA	Binary	461378	9851867	2018	MRC-IEU	Ben Elsworth	NA	Males and Females	European	39280	422098	NA	SD	41245#1860: Output from GWAS pipeline using Phesant derived variables from UKBiobank
finn-a-I9_CHD	Major coronary heart disease event	0	NA	Binary	94036	16152119	2020	NA	NA	NA	Males and Females	European	7123	89376	NA	NA	NA
ukb-d-I9_CHD	Major coronary heart disease event	0	NA	Binary	361194	13295130	2018	NA	Neale lab	NA	Males and Females	European	10157	351037	NA	NA	NA
ukb-d-I9_CHD_NOREV	Major coronary heart disease event excluding revascularizations	0	NA	Binary	361194	13295130	2018	NA	Neale lab	NA	Males and Females	European	10157	351037	NA	NA	NA
finn-a-I9_CHD_NOREV	Major coronary heart disease event excluding revascularizations	0	NA	Binary	94036	16152119	2020	NA	NA	NA	Males and Females	European	5909	89323	NA	NA	NA
ukb-d-1538_0	Major dietary changes in the last 5 years: No	0	NA	Binary	360294	13586569	2018	NA	Neale lab	NA	Males and Females	European	221368	138926	NA	NA	NA
ukb-d-1538_1	Major dietary changes in the last 5 years: Yes, because of illness	0	NA	Binary	360294	13586569	2018	NA	Neale lab	NA	Males and Females	European	38051	322243	NA	NA	NA
ukb-d-1538_2	Major dietary changes in the last 5 years: Yes, because of other reasons	0	NA	Binary	360294	13586569	2018	NA	Neale lab	NA	Males and Females	European	100875	259419	NA	NA	NA
finn-a-N14_MALEINFERT	Male infertility	0	NA	Binary	94036	16152119	2020	NA	NA	NA	Males and Females	European	239	33781	NA	NA	NA
ukb-d-C3_MELANOMA_SKIN	Malignant melanoma of skin	0	NA	Binary	361194	10855955	2018	NA	Neale lab	NA	Males and Females	European	2534	358660	NA	NA	NA
finn-a-C3_CANCER	Malignant neoplasm	0	NA	Binary	94036	16152119	2020	NA	NA	NA	Males and Females	European	9438	87061	NA	NA	NA
finn-a-C3_CANCER_EXALLC	Malignant neoplasm (ICD C excluded)	0	NA	Binary	94036	16152119	2020	NA	NA	NA	Males and Females	European	9438	87061	NA	NA	NA
finn-a-C3_BLADDER	Malignant neoplasm of bladder	0	NA	Binary	94036	16152119	2020	NA	NA	NA	Males and Females	European	366	96133	NA	NA	NA
finn-a-C3_BLADDER_EXALLC	Malignant neoplasm of bladder (ICD C excluded)	0	NA	Binary	94036	16152119	2020	NA	NA	NA	Males and Females	European	366	87061	NA	NA	NA
finn-a-C3_BRAIN	Malignant neoplasm of brain	0	NA	Binary	94036	16152119	2020	NA	NA	NA	Males and Females	European	142	96357	NA	NA	NA
finn-a-C3_BRAIN_EXALLC	Malignant neoplasm of brain (ICD C excluded)	0	NA	Binary	94036	16152119	2020	NA	NA	NA	Males and Females	European	142	87061	NA	NA	NA
finn-a-C3_BREAST_3	Malignant neoplasm of breast	0	NA	Binary	94036	16152119	2020	NA	NA	NA	Males and Females	European	2589	93910	NA	NA	NA
ukb-d-C3_BREAST_3	Malignant neoplasm of breast	0	NA	Binary	361194	13217865	2018	NA	Neale lab	NA	Males and Females	European	9721	351473	NA	NA	NA
finn-a-C3_BREAST	Malignant neoplasm of breast	0	NA	Binary	94036	16152119	2020	NA	NA	NA	Males and Females	European	2589	93910	NA	NA	NA
finn-a-C3_BREAST_3_EXALLC	Malignant neoplasm of breast (ICD C excluded)	0	NA	Binary	94036	16152119	2020	NA	NA	NA	Males and Females	European	2589	87061	NA	NA	NA
finn-a-C3_BREAST_EXALLC	Malignant neoplasm of breast (ICD C excluded)	0	NA	Binary	94036	16152119	2020	NA	NA	NA	Males and Females	European	2589	87061	NA	NA	NA
finn-a-C3_BRONCHUS_LUNG	Malignant neoplasm of bronchus and lung	0	NA	Binary	94036	16152119	2020	NA	NA	NA	Males and Females	European	516	95983	NA	NA	NA
ukb-d-C3_BRONCHUS_LUNG	Malignant neoplasm of bronchus and lung	0	NA	Binary	361194	10156362	2018	NA	Neale lab	NA	Males and Females	European	1681	359513	NA	NA	NA
finn-a-C3_BRONCHUS_LUNG_EXALLC	Malignant neoplasm of bronchus and lung (ICD C excluded)	0	NA	Binary	94036	16152119	2020	NA	NA	NA	Males and Females	European	516	86640	NA	NA	NA
ukb-d-C3_COLON	Malignant neoplasm of colon	0	NA	Binary	361194	10788369	2018	NA	Neale lab	NA	Males and Females	European	2437	358757	NA	NA	NA
finn-a-C3_COLON	Malignant neoplasm of colon	0	NA	Binary	94036	16152119	2020	NA	NA	NA	Males and Females	European	583	95916	NA	NA	NA
finn-a-C3_COLON_EXALLC	Malignant neoplasm of colon (ICD C excluded)	0	NA	Binary	94036	16152119	2020	NA	NA	NA	Males and Females	European	583	87061	NA	NA	NA
ukb-d-C3_CORPUS_UTERI	Malignant neoplasm of corpus uteri	0	NA	Binary	361194	9626384	2018	NA	Neale lab	NA	Males and Females	European	1222	359972	NA	NA	NA
finn-a-C3_CORPUS_UTERI	Malignant neoplasm of corpus uteri	0	NA	Binary	94036	16152119	2020	NA	NA	NA	Males and Females	European	366	53896	NA	NA	NA
finn-a-C3_CORPUS_UTERI_EXALLC	Malignant neoplasm of corpus uteri (ICD C excluded)	0	NA	Binary	94036	16152119	2020	NA	NA	NA	Males and Females	European	366	87061	NA	NA	NA
ukb-d-C3_DIGESTIVE_ORGANS	Malignant neoplasm of digestive organs	0	NA	Binary	361194	12268164	2018	NA	Neale lab	NA	Males and Females	European	5690	355504	NA	NA	NA
finn-a-C3_DIGESTIVE_ORGANS	Malignant neoplasm of digestive organs	0	NA	Binary	94036	16152119	2020	NA	NA	NA	Males and Females	European	1582	94917	NA	NA	NA
finn-a-C3_DIGESTIVE_ORGANS_EXALLC	Malignant neoplasm of digestive organs (ICD C excluded)	0	NA	Binary	94036	16152119	2020	NA	NA	NA	Males and Females	European	1582	87061	NA	NA	NA
finn-a-C3_ENDOCRINE	Malignant neoplasm of endocrine gland	0	NA	Binary	94036	16152119	2020	NA	NA	NA	Males and Females	European	328	96171	NA	NA	NA
finn-a-C3_ENDOCRINE_EXALLC	Malignant neoplasm of endocrine gland (ICD C excluded)	0	NA	Binary	94036	16152119	2020	NA	NA	NA	Males and Females	European	328	87061	NA	NA	NA
finn-a-C3_EYE_BRAIN_NEURO	Malignant neoplasm of eye, brain and central nervous system	0	NA	Binary	94036	16152119	2020	NA	NA	NA	Males and Females	European	207	96292	NA	NA	NA
finn-a-C3_EYE_BRAIN_NEURO_EXALLC	Malignant neoplasm of eye, brain and central nervous system (ICD C excluded)	0	NA	Binary	94036	16152119	2020	NA	NA	NA	Males and Females	European	207	87061	NA	NA	NA
ukb-d-C3_FEMALE_GENITAL	malignant neoplasm of female genital organs	0	NA	Binary	361194	10901963	2018	NA	Neale lab	NA	Males and Females	European	2603	358591	NA	NA	NA
finn-a-C3_FEMALE_GENITAL	malignant neoplasm of female genital organs	0	NA	Binary	94036	16152119	2020	NA	NA	NA	Males and Females	European	672	53590	NA	NA	NA
finn-a-C3_FEMALE_GENITAL_EXALLC	malignant neoplasm of female genital organs (ICD C excluded)	0	NA	Binary	94036	16152119	2020	NA	NA	NA	Males and Females	European	672	87061	NA	NA	NA
finn-a-C3_KIDNEY_NOTRENALPELVIS	Malignant neoplasm of kidney, except renal pelvis	0	NA	Binary	94036	16152119	2020	NA	NA	NA	Males and Females	European	301	96198	NA	NA	NA
finn-a-C3_KIDNEY_NOTRENALPELVIS_EXALLC	Malignant neoplasm of kidney, except renal pelvis (ICD C excluded)	0	NA	Binary	94036	16152119	2020	NA	NA	NA	Males and Females	European	301	87061	NA	NA	NA
finn-a-C3_LIP_ORAL_PHARYNX	Malignant neoplasm of lip, oral cavity and pharynx	0	NA	Binary	94036	16152119	2020	NA	NA	NA	Males and Females	European	234	96265	NA	NA	NA
finn-a-C3_LIP_ORAL_PHARYNX_EXALLC	Malignant neoplasm of lip, oral cavity and pharynx (ICD C excluded)	0	NA	Binary	94036	16152119	2020	NA	NA	NA	Males and Females	European	234	87061	NA	NA	NA
finn-a-C3_MALE_GENITAL	malignant neoplasm of male genital organs	0	NA	Binary	94036	16152119	2020	NA	NA	NA	Males and Females	European	1887	94612	NA	NA	NA
ukb-d-C3_MALE_GENITAL	malignant neoplasm of male genital organs	0	NA	Binary	361194	12582534	2018	NA	Neale lab	NA	Males and Females	European	6795	354399	NA	NA	NA
finn-a-C3_MALE_GENITAL_EXALLC	malignant neoplasm of male genital organs (ICD C excluded)	0	NA	Binary	94036	16152119	2020	NA	NA	NA	Males and Females	European	1887	87061	NA	NA	NA
finn-a-C3_OVARY	Malignant neoplasm of ovary	0	NA	Binary	94036	16152119	2020	NA	NA	NA	Males and Females	European	184	54078	NA	NA	NA
finn-a-C3_OVARY_EXALLC	Malignant neoplasm of ovary (ICD C excluded)	0	NA	Binary	94036	16152119	2020	NA	NA	NA	Males and Females	European	184	87061	NA	NA	NA
finn-a-C3_PANCREAS	Malignant neoplasm of pancreas	0	NA	Binary	94036	16152119	2020	NA	NA	NA	Males and Females	European	229	96270	NA	NA	NA
finn-a-C3_PANCREAS_EXALLC	Malignant neoplasm of pancreas (ICD C excluded)	0	NA	Binary	94036	16152119	2020	NA	NA	NA	Males and Females	European	229	87061	NA	NA	NA
ukb-d-C3_PROSTATE	Malignant neoplasm of prostate	0	NA	Binary	361194	12453833	2018	NA	Neale lab	NA	Males and Females	European	6321	354873	NA	NA	NA
finn-a-C3_PROSTATE	Malignant neoplasm of prostate	0	NA	Binary	94036	16152119	2020	NA	NA	NA	Males and Females	European	1824	40413	NA	NA	NA
finn-a-C3_PROSTATE_EXALLC	Malignant neoplasm of prostate (ICD C excluded)	0	NA	Binary	94036	16152119	2020	NA	NA	NA	Males and Females	European	1824	87061	NA	NA	NA
ukb-d-C_RECTUM	Malignant neoplasm of rectum	0	NA	Binary	361194	9554384	2018	NA	Neale lab	NA	Males and Females	European	1170	360024	NA	NA	NA
finn-a-C3_RECTUM	Malignant neoplasm of rectum	0	NA	Binary	94036	16152119	2020	NA	NA	NA	Males and Females	European	263	96236	NA	NA	NA
finn-a-C3_RECTUM_EXALLC	Malignant neoplasm of rectum (ICD C excluded)	0	NA	Binary	94036	16152119	2020	NA	NA	NA	Males and Females	European	263	87061	NA	NA	NA
ukb-d-C3_RESPIRATORY_INTRATHORACIC	Malignant neoplasm of respiratory system and intrathoracic organs	0	NA	Binary	361194	10401769	2018	NA	Neale lab	NA	Males and Females	European	1944	359250	NA	NA	NA
finn-a-C3_RESPIRATORY_INTRATHORACIC	Malignant neoplasm of respiratory system and intrathoracic organs	0	NA	Binary	94036	16152119	2020	NA	NA	NA	Males and Females	European	615	95884	NA	NA	NA
finn-a-C3_RESPIRATORY_INTRATHORACIC_EXALLC	Malignant neoplasm of respiratory system and intrathoracic organs (ICD C excluded)	0	NA	Binary	94036	16152119	2020	NA	NA	NA	Males and Females	European	615	86565	NA	NA	NA
finn-a-C3_SKIN	Malignant neoplasm of skin	0	NA	Binary	94036	16152119	2020	NA	NA	NA	Males and Females	European	895	95604	NA	NA	NA
ukb-d-C3_SKIN	Malignant neoplasm of skin	0	NA	Binary	361194	13586589	2018	NA	Neale lab	NA	Males and Females	European	16531	344663	NA	NA	NA
finn-a-C3_SKIN_EXALLC	Malignant neoplasm of skin (ICD C excluded)	0	NA	Binary	94036	16152119	2020	NA	NA	NA	Males and Females	European	895	87061	NA	NA	NA
finn-a-C3_THYROID_GLAND	Malignant neoplasm of thyroid gland	0	NA	Binary	94036	16152119	2020	NA	NA	NA	Males and Females	European	321	96178	NA	NA	NA
finn-a-C3_THYROID_GLAND_EXALLC	Malignant neoplasm of thyroid gland (ICD C excluded)	0	NA	Binary	94036	16152119	2020	NA	NA	NA	Males and Females	European	321	87061	NA	NA	NA
ukb-d-C3_URINARY_TRACT	Malignant neoplasm of urinary organs	0	NA	Binary	361194	10309627	2018	NA	Neale lab	NA	Males and Females	European	1841	359353	NA	NA	NA
finn-a-C3_URINARY_TRACT	Malignant neoplasm of urinary organs	0	NA	Binary	94036	16152119	2020	NA	NA	NA	Males and Females	European	690	95809	NA	NA	NA
finn-a-C3_URINARY_TRACT_EXALLC	Malignant neoplasm of urinary organs (ICD C excluded)	0	NA	Binary	94036	16152119	2020	NA	NA	NA	Males and Females	European	690	87061	NA	NA	NA
finn-a-CANCER	Malignat neoplasms	0	NA	Binary	94036	16152119	2020	NA	NA	NA	Males and Females	European	9438	32736	NA	NA	NA
finn-a-F5_MANIA	Manic episode	0	NA	Binary	94036	16152119	2020	NA	NA	NA	Males and Females	European	299	86081	NA	NA	NA
ukb-b-10002	Manic/hyper symptoms: All of the above	1	NA	Binary	31317	9851867	2018	MRC-IEU	Ben Elsworth	NA	Males and Females	European	3177	28140	NA	SD	6156#15: Output from GWAS pipeline using Phesant derived variables from UKBiobank
ukb-b-11588	Manic/hyper symptoms: I needed less sleep than usual	1	NA	Binary	31317	9851867	2018	MRC-IEU	Ben Elsworth	NA	Males and Females	European	4245	27072	NA	SD	6156#13: Output from GWAS pipeline using Phesant derived variables from UKBiobank
ukb-b-11542	Manic/hyper symptoms: I was more active than usual	1	NA	Binary	31317	9851867	2018	MRC-IEU	Ben Elsworth	NA	Males and Females	European	7877	23440	NA	SD	6156#11: Output from GWAS pipeline using Phesant derived variables from UKBiobank
ukb-b-13187	Manic/hyper symptoms: I was more creative or had more ideas than usual	1	NA	Binary	31317	9851867	2018	MRC-IEU	Ben Elsworth	NA	Males and Females	European	3745	27572	NA	SD	6156#14: Output from GWAS pipeline using Phesant derived variables from UKBiobank
ukb-b-8893	Manic/hyper symptoms: I was more talkative than usual	1	NA	Binary	31317	9851867	2018	MRC-IEU	Ben Elsworth	NA	Males and Females	European	6523	24794	NA	SD	6156#12: Output from GWAS pipeline using Phesant derived variables from UKBiobank
ukb-b-256	Manic/hyper symptoms: None of the above	1	NA	Binary	31317	9851867	2018	MRC-IEU	Ben Elsworth	NA	Males and Females	European	11226	20091	NA	SD	6156#100: Output from GWAS pipeline using Phesant derived variables from UKBiobank
ukb-d-20548_5	Manifestations of mania or irritability: I needed less sleep than usual	0	NA	Binary	114422	11551022	2018	NA	Neale lab	NA	Males and Females	European	3777	110645	NA	NA	NA
ukb-d-20548_7	Manifestations of mania or irritability: I was easily distracted	0	NA	Binary	114422	13113620	2018	NA	Neale lab	NA	Males and Females	European	9162	105260	NA	NA	NA
ukb-d-20548_9	Manifestations of mania or irritability: I was more active than usual	0	NA	Binary	114422	12268228	2018	NA	Neale lab	NA	Males and Females	European	5688	108734	NA	NA	NA
ukb-d-20548_8	Manifestations of mania or irritability: I was more confident than usual	0	NA	Binary	114422	11306770	2018	NA	Neale lab	NA	Males and Females	European	3285	111137	NA	NA	NA
ukb-d-20548_6	Manifestations of mania or irritability: I was more creative or had more ideas than usual	0	NA	Binary	114422	11200219	2018	NA	Neale lab	NA	Males and Females	European	3090	111332	NA	NA	NA
ukb-d-20548_2	Manifestations of mania or irritability: I was more restless than usual	0	NA	Binary	114422	13571113	2018	NA	Neale lab	NA	Males and Females	European	12876	101546	NA	NA	NA
ukb-d-20548_1	Manifestations of mania or irritability: I was more talkative than usual	0	NA	Binary	114422	12198263	2018	NA	Neale lab	NA	Males and Females	European	5465	108957	NA	NA	NA
ukb-d-20548_3	Manifestations of mania or irritability: My thoughts were racing	0	NA	Binary	114422	13364555	2018	NA	Neale lab	NA	Males and Females	European	10580	103842	NA	NA	NA
ukb-b-17685	Maternal smoking around birth	1	NA	Binary	397732	9851867	2018	MRC-IEU	Ben Elsworth	NA	Males and Females	European	121634	276098	NA	SD	1787: Output from GWAS pipeline using Phesant derived variables from UKBiobank
ukb-b-12276	Meat consumers	1	NA	Binary	64949	9851867	2018	MRC-IEU	Ben Elsworth	NA	Males and Females	European	44775	20174	NA	SD	103000: Output from GWAS pipeline using Phesant derived variables from UKBiobank
finn-a-M13_MEDIALEPICOND	Medial epicondylitis	0	NA	Binary	94036	16152119	2020	NA	NA	NA	Males and Females	European	223	76986	NA	NA	NA
ukb-b-14395	Medication for cholesterol, blood pressure or diabetes: Blood pressure medication	1	NA	Binary	209638	9851867	2018	MRC-IEU	Ben Elsworth	NA	Males and Females	European	51976	157662	NA	SD	6177#2: Output from GWAS pipeline using Phesant derived variables from UKBiobank
ukb-b-11740	Medication for cholesterol, blood pressure or diabetes: Cholesterol lowering medication	1	NA	Binary	209638	9851867	2018	MRC-IEU	Ben Elsworth	NA	Males and Females	European	48450	161188	NA	SD	6177#1: Output from GWAS pipeline using Phesant derived variables from UKBiobank
ukb-b-7350	Medication for cholesterol, blood pressure or diabetes: Insulin	1	NA	Binary	209638	9851867	2018	MRC-IEU	Ben Elsworth	NA	Males and Females	European	2891	206747	NA	SD	6177#3: Output from GWAS pipeline using Phesant derived variables from UKBiobank
ukb-b-12014	Medication for cholesterol, blood pressure or diabetes: None of the above	1	NA	Binary	209638	9851867	2018	MRC-IEU	Ben Elsworth	NA	Males and Females	European	139819	69819	NA	SD	6177#100: Output from GWAS pipeline using Phesant derived variables from UKBiobank
ukb-b-18009	Medication for cholesterol, blood pressure, diabetes, or take exogenous hormones: Blood pressure medication	1	NA	Binary	249710	9851867	2018	MRC-IEU	Ben Elsworth	NA	Males and Females	European	43244	206466	NA	SD	6153#2: Output from GWAS pipeline using Phesant derived variables from UKBiobank
ukb-b-17805	Medication for cholesterol, blood pressure, diabetes, or take exogenous hormones: Cholesterol lowering medication	1	NA	Binary	249710	9851867	2018	MRC-IEU	Ben Elsworth	NA	Males and Females	European	31553	218157	NA	SD	6153#1: Output from GWAS pipeline using Phesant derived variables from UKBiobank
ukb-b-8080	Medication for cholesterol, blood pressure, diabetes, or take exogenous hormones: Hormone replacement therapy	1	NA	Binary	249710	9851867	2018	MRC-IEU	Ben Elsworth	NA	Males and Females	European	18641	231069	NA	SD	6153#4: Output from GWAS pipeline using Phesant derived variables from UKBiobank
ukb-b-14070	Medication for cholesterol, blood pressure, diabetes, or take exogenous hormones: Insulin	1	NA	Binary	249710	9851867	2018	MRC-IEU	Ben Elsworth	NA	Males and Females	European	1918	247792	NA	SD	6153#3: Output from GWAS pipeline using Phesant derived variables from UKBiobank
ukb-b-20379	Medication for cholesterol, blood pressure, diabetes, or take exogenous hormones: None of the above	1	NA	Binary	249710	9851867	2018	MRC-IEU	Ben Elsworth	NA	Males and Females	European	172332	77378	NA	SD	6153#100: Output from GWAS pipeline using Phesant derived variables from UKBiobank
ukb-b-9547	Medication for cholesterol, blood pressure, diabetes, or take exogenous hormones: Oral contraceptive pill or minipill	1	NA	Binary	249710	9851867	2018	MRC-IEU	Ben Elsworth	NA	Males and Females	European	6501	243209	NA	SD	6153#5: Output from GWAS pipeline using Phesant derived variables from UKBiobank
ukb-b-7137	Medication for pain relief, constipation, heartburn: Aspirin	1	NA	Binary	457547	9851867	2018	MRC-IEU	Ben Elsworth	NA	Males and Females	European	64534	393013	NA	SD	6154#1: Output from GWAS pipeline using Phesant derived variables from UKBiobank
ukb-b-8888	Medication for pain relief, constipation, heartburn: Ibuprofen (e.g. Nurofen)	1	NA	Binary	457547	9851867	2018	MRC-IEU	Ben Elsworth	NA	Males and Females	European	68195	389352	NA	SD	6154#2: Output from GWAS pipeline using Phesant derived variables from UKBiobank
ukb-b-11461	Medication for pain relief, constipation, heartburn: Laxatives (e.g. Dulcolax, Senokot)	1	NA	Binary	457547	9851867	2018	MRC-IEU	Ben Elsworth	NA	Males and Females	European	13478	444069	NA	SD	6154#6: Output from GWAS pipeline using Phesant derived variables from UKBiobank
ukb-b-11085	Medication for pain relief, constipation, heartburn: None of the above	1	NA	Binary	457547	9851867	2018	MRC-IEU	Ben Elsworth	NA	Males and Females	European	252893	204654	NA	SD	6154#100: Output from GWAS pipeline using Phesant derived variables from UKBiobank
ukb-b-11605	Medication for pain relief, constipation, heartburn: Omeprazole (e.g. Zanprol)	1	NA	Binary	457547	9851867	2018	MRC-IEU	Ben Elsworth	NA	Males and Females	European	27747	429800	NA	SD	6154#5: Output from GWAS pipeline using Phesant derived variables from UKBiobank
ukb-b-17595	Medication for pain relief, constipation, heartburn: Paracetamol	1	NA	Binary	457547	9851867	2018	MRC-IEU	Ben Elsworth	NA	Males and Females	European	100943	356604	NA	SD	6154#3: Output from GWAS pipeline using Phesant derived variables from UKBiobank
ukb-b-8146	Medication for pain relief, constipation, heartburn: Ranitidine (e.g. Zantac)	1	NA	Binary	457547	9851867	2018	MRC-IEU	Ben Elsworth	NA	Males and Females	European	8885	448662	NA	SD	6154#4: Output from GWAS pipeline using Phesant derived variables from UKBiobank
finn-a-ASTHMA_MEDICATIO_COMORB	Medication related adverse effects	0	NA	Binary	94036	16152119	2020	NA	NA	NA	Males and Females	European	12697	47900	NA	NA	NA
ukb-d-ASTHMA_MEDICATIO_COMORB	Medication related adverse effects	0	NA	Binary	361194	13586589	2018	NA	Neale lab	NA	Males and Females	European	20094	341100	NA	NA	NA
ukb-d-PULM_MEDICATIO_COMORB	Medication related adverse effects (Asthma/COPD)	0	NA	Binary	361194	13586589	2018	NA	Neale lab	NA	Males and Females	European	21706	339488	NA	NA	NA
finn-a-PULM_MEDICATIO_COMORB	Medication related adverse effects (Asthma/COPD)	0	NA	Binary	94036	16152119	2020	NA	NA	NA	Males and Females	European	13587	82912	NA	NA	NA
finn-a-CD2_BENIGN_MELANOCYTIC	Melanocytic naevi	0	NA	Binary	94036	16152119	2020	NA	NA	NA	Males and Females	European	1452	95047	NA	NA	NA
finn-a-CD2_BENIGN_MELANOCYTIC_EXALLC	Melanocytic naevi (ICD C excluded)	0	NA	Binary	94036	16152119	2020	NA	NA	NA	Males and Females	European	1452	85909	NA	NA	NA
finn-a-CD2_BENIGN_MELANOCYTIC_LOWERLIMB	Melanocytic naevi of lower limb, including hip	0	NA	Binary	94036	16152119	2020	NA	NA	NA	Males and Females	European	159	96340	NA	NA	NA
finn-a-CD2_BENIGN_MELANOCYTIC_LOWERLIMB_EXALLC	Melanocytic naevi of lower limb, including hip (ICD C excluded)	0	NA	Binary	94036	16152119	2020	NA	NA	NA	Males and Females	European	159	86946	NA	NA	NA
finn-a-CD2_BENIGN_MELANOCYTIC_FACE	Melanocytic naevi of other and unspecified parts of face	0	NA	Binary	94036	16152119	2020	NA	NA	NA	Males and Females	European	337	96162	NA	NA	NA
finn-a-CD2_BENIGN_MELANOCYTIC_FACE_EXALLC	Melanocytic naevi of other and unspecified parts of face (ICD C excluded)	0	NA	Binary	94036	16152119	2020	NA	NA	NA	Males and Females	European	337	86771	NA	NA	NA
finn-a-CD2_BENIGN_MELANOCYTIC_TRUNK	Melanocytic naevi of trunk	0	NA	Binary	94036	16152119	2020	NA	NA	NA	Males and Females	European	506	95993	NA	NA	NA
finn-a-CD2_BENIGN_MELANOCYTIC_TRUNK_EXALLC	Melanocytic naevi of trunk (ICD C excluded)	0	NA	Binary	94036	16152119	2020	NA	NA	NA	Males and Females	European	506	86672	NA	NA	NA
finn-a-CD2_BENIGN_MELANOCYTIC_NOS	Melanocytic naevi, other sites/unspecified	0	NA	Binary	94036	16152119	2020	NA	NA	NA	Males and Females	European	281	96218	NA	NA	NA
finn-a-CD2_BENIGN_MELANOCYTIC_NOS_EXALLC	Melanocytic naevi, other sites/unspecified (ICD C excluded)	0	NA	Binary	94036	16152119	2020	NA	NA	NA	Males and Females	European	281	86855	NA	NA	NA
finn-a-MEMLOSS	Memory loss	0	NA	Binary	94036	16152119	2020	NA	NA	NA	Males and Females	European	545	95954	NA	NA	NA
finn-a-H8_MENIERE	Meniere disease	0	NA	Binary	94036	16152119	2020	NA	NA	NA	Males and Females	European	641	92866	NA	NA	NA
[truncated: 12,424 more rows]

## Sheet: Table S4
Table S4. All MR results based on the HGI A2 dataset.
GWAS ID	trait	b_IVW_MRE	se_IVW_MRE	pval_IVW_MRE	b_Egger	se_Egger	pval_Egger	b_Wald	se_Wald	pval_Wald	Egger_intercept	pval_intercept	Het_IVW_pval	Het_Egger_pval	b_W_Med	se_W_Med	pval_W_Med	b_W_Mod	se_W_Mod	pval_W_Mod	nsnps
ukb-d-M13_ARTHROSIS	#Arthrosis	0.545111	3.87333	0.88808	-7.11205	39.3997	0.862695	-	-	-	0.0311525	0.851496	0.525327	0.413688	-0.416633	5.2346	0.936562	-1.56678	6.90936	0.827089	8
ukb-d-M13_OTHERJOINT	#Other joint disorders	-	-	-	-	-	-	-5.42441	8.42522	0.519685	-	-	-	-	-	-	-	-	-	-	1
ukb-d-M13_POLYARTHROPATHIES	#Polyarthropathies	4.9404	17.5823	0.77872	-	-	-	-	-	-	-	-	-	-	-	-	-	-	-	-	2
ukb-d-M13_SPONDYLOPATHY	#Spondylopathies	-	-	-	-	-	-	9.83638	36.1226	0.785387	-	-	-	-	-	-	-	-	-	-	1
ukb-d-L12_ACTINKERA	Actinic keratosis	28.6081	41.5864	0.491503	-	-	-	-	-	-	-	-	-	-	-	-	-	-	-	-	2
finn-a-L12_ACTINKERA	Actinic keratosis	-	-	-	-	-	-	0.104573	0.130807	0.424034	-	-	-	-	-	-	-	-	-	-	1
ukb-d-20554_6	Actions taken following self-harm: Receive help from friends / family / neighbours	-	-	-	-	-	-	-1.36128	12.3245	0.91205	-	-	-	-	-	-	-	-	-	-	1
ukb-d-20550_1	Activities undertaken to treat anxiety: Talking therapies, such as psychotherapy, counselling, group therapy or CBT	-	-	-	-	-	-	1.72669	3.80478	0.649959	-	-	-	-	-	-	-	-	-	-	1
ukb-d-20547_3	Activities undertaken to treat depression: Other therapeutic activities such as mindfulness, yoga or art classes	-7.04045	1.19479	3.80056e-09	-	-	-	-	-	-	-	-	-	-	-	-	-	-	-	-	2
ukb-d-20547_1	Activities undertaken to treat depression: Talking therapies, such as psychotherapy, counselling, group therapy or CBT	1.4082	0.248005	1.36198e-08	-	-	-	-	-	-	-	-	-	-	-	-	-	-	-	-	2
finn-a-H7_IRIDOACUTE	Acute and subacute iridocyclitis	-0.0615191	0.0270837	0.0231204	-0.0166926	0.110065	0.90418	-	-	-	-0.0637088	0.694358	0.855614	0.840115	-0.0545541	0.0694534	0.432174	-0.0502037	0.0785993	0.588385	3
ukb-d-M13_ADHCAPSULITIS	Adhesive capsulitis of shoulder	-	-	-	-	-	-	-48.7788	32.3385	0.131457	-	-	-	-	-	-	-	-	-	-	1
ukb-d-STILL_ADULT	Adult-onset Still disease	5.50838	9.04745	0.542636	9.26618	44.2648	0.853573	-	-	-	-0.0112326	0.937226	0.70419	0.497126	7.97068	14.3669	0.579035	8.17105	14.4337	0.610899	4
finn-a-STILL_ADULT	Adult-onset Still disease	-	-	-	-	-	-	0.0449888	0.0915985	0.623319	-	-	-	-	-	-	-	-	-	-	1
ukb-b-11158	Aide-memoire completed	-5.29653	5.59118	0.343485	21.6748	20.6453	0.370891	-	-	-	-0.161376	0.270376	0.0818214	0.160675	-3.81239	5.49993	0.488202	-3.9768	7.52054	0.624932	5
ukb-b-10923	Alcohol consumed	-	-	-	-	-	-	5.08889	1.56371	0.00113642	-	-	-	-	-	-	-	-	-	-	1
ukb-d-20117_2	Alcohol drinker status: Current	13.2774	10.6988	0.214598	42.7239	13.4517	0.194186	-	-	-	-0.169674	0.245707	0.04835	0.965084	3.13502	9.36331	0.737761	-2.16539	17.527	0.912971	3
ukb-b-16878	Alcohol usually taken with meals	-1.52018	0.837516	0.0695081	-4.91987	6.78883	0.473743	-	-	-	0.0294964	0.616931	0.603135	0.567274	-1.55733	1.23996	0.209134	-2.25529	1.96312	0.258645	35
ukb-d-41219_2	Anaesthetics administered during delivery: Epidural or caudal anaesthetic	-	-	-	-	-	-	-0.222167	0.532902	0.676751	-	-	-	-	-	-	-	-	-	-	1
finn-a-M13_ANKYLOSPON	Ankylosing spondylitis	-0.0299619	0.00991636	0.00251555	-	-	-	-	-	-	-	-	-	-	-	-	-	-	-	-	2
ukb-b-8446	Answered sexual history questions	0.674094	12.8212	0.958069	-	-	-	-	-	-	-	-	-	-	-	-	-	-	-	-	2
ukb-d-ICDMAIN_ANY_ENTRY	Any ICDMAIN event in hilmo or causes of death	7.75764	2.37633	0.00109642	-13.4744	22.5513	0.592267	-	-	-	0.142338	0.41223	0.641999	0.656588	5.58344	3.8368	0.145605	4.68802	5.52229	0.443742	5
ukb-d-KRA_PSY_ANYMENTAL	Any mental disorder	-	-	-	-	-	-	11.5036	25.8695	0.656552	-	-	-	-	-	-	-	-	-	-	1
finn-a-J10_ASTHMA	Asthma	-	-	-	-	-	-	-0.817727	0.653768	0.21101	-	-	-	-	-	-	-	-	-	-	1
ukb-d-J10_ASTHMA	Asthma	34.3698	7.35148	2.93636e-06	-	-	-	-	-	-	-	-	-	-	-	-	-	-	-	-	2
finn-a-J10_ASTHMA_EXMORE	Asthma	-	-	-	-	-	-	-0.811986	0.649178	0.21101	-	-	-	-	-	-	-	-	-	-	1
finn-a-ASTHMA_MODE	Asthma (mode)	-	-	-	-	-	-	-0.401881	0.333725	0.228503	-	-	-	-	-	-	-	-	-	-	1
finn-a-ASTHMA_COMORB	Asthma associated co-morbidites	-0.0116854	0.163423	0.942996	-	-	-	-	-	-	-	-	-	-	-	-	-	-	-	-	2
ukb-d-ASTHMA_HOSPITAL1	Asthma, hospital admissions 1	20.09	34.1813	0.556701	-	-	-	-	-	-	-	-	-	-	-	-	-	-	-	-	2
ukb-b-1867	Attendance/disability/mobility allowance: Blue badge	-16.1857	17.3002	0.34949	-	-	-	-	-	-	-	-	-	-	-	-	-	-	-	-	2
ukb-b-20214	Attendance/disability/mobility allowance: Disability living allowance	0.0293145	6.70834	0.996513	-23.7578	31.9024	0.489952	-	-	-	0.0673417	0.479354	0.213924	0.187812	-1.59454	8.42408	0.84987	-9.85872	13.381	0.489059	7
ukb-b-3855	Attendance/disability/mobility allowance: None of the above	-2.84491	5.39543	0.597998	7.51496	29.3641	0.806558	-	-	-	-0.0356736	0.731313	0.17066	0.120044	-3.88514	6.42363	0.545299	-1.45495	10.4233	0.892918	8
ukb-b-8463	Back pain for 3+ months	-	-	-	-	-	-	1.71171	2.48167	0.490356	-	-	-	-	-	-	-	-	-	-	1
ukb-d-20526	Been in serious accident believed to be life-threatening	-	-	-	-	-	-	8.43924	7.43517	0.256357	-	-	-	-	-	-	-	-	-	-	1
ukb-d-20552_2	Behavioural and miscellaneous addictions: A behaviour	-	-	-	-	-	-	-19.0772	22.8153	0.403067	-	-	-	-	-	-	-	-	-	-	1
finn-a-CD2_BENIGN	Benign neoplasms	0.437124	0.177797	0.0139495	-	-	-	-	-	-	-	-	-	-	-	-	-	-	-	-	2
finn-a-CD2_BENIGN_EXALLC	Benign neoplasms (ICD C excluded)	0.438197	0.171277	0.0105154	-	-	-	-	-	-	-	-	-	-	-	-	-	-	-	-	2
ukb-b-17868	Bilateral oophorectomy (both ovaries removed)	3.23038	3.54895	0.362699	5.40448	14.9563	0.741786	-	-	-	-0.0155381	0.889484	0.20401	0.117048	6.44393	3.96247	0.103898	8.08096	5.46534	0.213332	5
ukb-d-20126_0	Bipolar and major depression status: No Bipolar or Depression	-	-	-	-	-	-	2.24285	2.53569	0.376419	-	-	-	-	-	-	-	-	-	-	1
ukb-b-20296	Blood clot, DVT, bronchitis, emphysema, asthma, rhinitis, eczema, allergy diagnosed by doctor: Asthma	-1.28184	0.742958	0.0844689	-2.16758	1.84366	0.242593	-	-	-	0.00688877	0.600563	0.0589384	0.0535127	-0.879141	1.12582	0.434865	-0.0450412	1.63004	0.978012	99
ukb-b-11411	Blood clot, DVT, bronchitis, emphysema, asthma, rhinitis, eczema, allergy diagnosed by doctor: Blood clot in the leg (DVT)	0.334517	5.20274	0.948734	-19.4	23.5704	0.434318	-	-	-	0.0616707	0.415289	0.41337	0.387991	-1.17625	7.39092	0.873552	-5.87532	9.30931	0.543654	10
ukb-b-13704	Blood clot, DVT, bronchitis, emphysema, asthma, rhinitis, eczema, allergy diagnosed by doctor: Blood clot in the lung	-0.0404355	15.888	0.997969	74.1116	44.5178	0.171291	-	-	-	-0.158846	0.155666	0.017339	0.0993235	0.0922245	15.7712	0.995334	26.7123	25.3283	0.339861	6
ukb-b-16207	Blood clot, DVT, bronchitis, emphysema, asthma, rhinitis, eczema, allergy diagnosed by doctor: Emphysema/chronic bronchitis	-	-	-	-	-	-	-24.5058	21.4816	0.253961	-	-	-	-	-	-	-	-	-	-	1
ukb-b-17241	Blood clot, DVT, bronchitis, emphysema, asthma, rhinitis, eczema, allergy diagnosed by doctor: Hayfever, allergic rhinitis or eczema	-0.511423	0.455776	0.261822	-0.0331945	1.10763	0.976134	-	-	-	-0.00469969	0.636234	0.263536	0.249107	0.449478	0.730901	0.538578	1.18474	1.23247	0.338026	145
ukb-b-18200	Blood clot, DVT, bronchitis, emphysema, asthma, rhinitis, eczema, allergy diagnosed by doctor: None of the above	0.289513	0.424258	0.494986	-0.149604	0.996096	0.880809	-	-	-	0.0049761	0.626584	0.0130526	0.0117747	-0.410973	0.628575	0.513229	-0.778907	0.908768	0.392694	158
ukb-b-11262	Blood sample #, note contents: Poor venous access/flow	-	-	-	-	-	-	-26.9218	38.6525	0.48611	-	-	-	-	-	-	-	-	-	-	1
ukb-d-5182_1	Both eyes present: Yes	3.75735	8.07007	0.641508	-2.74544	15.403	0.861507	-	-	-	0.0513245	0.625104	0.491686	0.430726	-0.688596	10.7373	0.948866	-1.57227	10.3878	0.882018	14
ukb-d-1448_4	Bread type: Other type of bread	-10.0744	5.2556	0.0552527	-9.39717	24.8718	0.770024	-	-	-	-0.00263022	0.981622	0.668655	0.369858	-12.4339	9.4236	0.18702	-12.4441	9.26658	0.311414	3
ukb-d-1448_1	Bread type: White	0.705344	1.1303	0.532606	0.256238	7.33498	0.972497	-	-	-	0.00327665	0.951001	0.811729	0.762487	-0.0822749	1.92627	0.965931	-0.473813	2.64474	0.85962	21
ukb-d-1448_3	Bread type: Wholemeal or wholegrain	-1.50261	1.14898	0.190949	-4.20208	9.61584	0.668779	-	-	-	0.0216088	0.780639	0.841836	0.793732	-0.880666	2.05349	0.668023	-1.19119	2.4678	0.636283	16
ukb-b-13423	Breastfed as a baby	0.161445	1.42267	0.90965	0.66059	33.5617	0.985239	-	-	-	-0.00339366	0.988819	0.870674	0.765007	-0.428834	2.93748	0.883932	-0.527589	3.89052	0.897421	6
ukb-d-22616_0	Breathing problems during period of job: No	-	-	-	-	-	-	-6.12668	20.1013	0.760526	-	-	-	-	-	-	-	-	-	-	1
ukb-d-22616_1	Breathing problems during period of job: Yes	-	-	-	-	-	-	3.85444	4.7848	0.420497	-	-	-	-	-	-	-	-	-	-	1
ukb-d-22618_0	Breathing problems improved/stopped away from workplace or on holiday: No	-	-	-	-	-	-	5.22605	5.19257	0.314201	-	-	-	-	-	-	-	-	-	-	1
ukb-d-22618_1	Breathing problems improved/stopped away from workplace or on holiday: Yes	-	-	-	-	-	-	4.8039	7.84967	0.540546	-	-	-	-	-	-	-	-	-	-	1
ukb-d-22619_0	Breathing problems responsible for leaving job: No	-	-	-	-	-	-	-5.83434	22.1839	0.792552	-	-	-	-	-	-	-	-	-	-	1
ukb-b-12841	Bring up phlegm/sputum/mucus on most days	-2.76857	3.77861	0.463745	7.19217	31.1079	0.838658	-	-	-	-0.0860982	0.776932	0.12808	0.0671901	-4.13463	3.58502	0.248784	-6.15005	3.65807	0.19131	4
ukb-d-BRONCHITIS	Bronchitis	-	-	-	-	-	-	24.1451	19.4071	0.213447	-	-	-	-	-	-	-	-	-	-	1
finn-a-L12_BULLOUS	Bullous disorders	-	-	-	-	-	-	0.155572	0.159692	0.329956	-	-	-	-	-	-	-	-	-	-	1
ukb-b-8837	Cancer code, self-reported: basal cell carcinoma	-6.03824	9.2557	0.514156	0.536975	43.4745	0.990333	-	-	-	-0.0118618	0.87915	0.122729	0.0902512	-13.0602	11.0777	0.238413	-10.4055	16.05	0.527269	15
ukb-b-8193	Cancer code, self-reported: bladder cancer	-	-	-	-	-	-	-70.5728	86.301	0.413499	-	-	-	-	-	-	-	-	-	-	1
ukb-b-16890	Cancer code, self-reported: breast cancer	1.3211	4.0028	0.741367	1.64455	10.4771	0.877121	-	-	-	-0.00114099	0.973607	0.0261226	0.0180441	-2.67657	4.65973	0.565694	-2.25735	5.45295	0.683788	19
ukb-b-8777	Cancer code, self-reported: cervical cancer	-	-	-	-	-	-	33.3444	55.8402	0.550414	-	-	-	-	-	-	-	-	-	-	1
ukb-b-12915	Cancer code, self-reported: malignant melanoma	-26.7582	22.4272	0.232823	-109.226	84.3666	0.28608	-	-	-	0.125774	0.385374	0.0441563	0.0631898	-52.2465	19.7853	0.00827428	-56.0818	22.866	0.0702465	5
ukb-b-13348	Cancer code, self-reported: prostate cancer	7.92641	9.63378	0.410637	-22.6868	49.9327	0.656084	-	-	-	0.0422329	0.541167	0.0753105	0.0638888	7.19995	10.8202	0.505783	6.91607	14.5287	0.64049	17
ukb-b-16855	Cancer diagnosed by doctor	-1.60685	4.93198	0.744574	2.1578	17.658	0.905162	-	-	-	-0.0172553	0.828079	0.0320296	0.0209031	-3.69094	5.24562	0.481667	-3.45744	7.36315	0.647839	12
ukb-d-C_DIGESTIVE_ORGANS	Cancer of digestive organs	-4.95669	11.9088	0.677248	-	-	-	-	-	-	-	-	-	-	-	-	-	-	-	-	2
ukb-d-C_MALE_GENITAL	Cancer of male genital	4.076	2.96337	0.168988	-0.480617	8.92838	0.957516	-	-	-	0.0143823	0.589788	0.661753	0.624039	2.38226	4.33152	0.582331	1.42846	5.43555	0.794859	26
ukb-d-C_PRIMARY_LYMPHOID_HEMATOPOIETIC	Cancer of primary lymphoid hematopoietic	-73.2681	6.76786	2.59551e-27	-	-	-	-	-	-	-	-	-	-	-	-	-	-	-	-	2
ukb-d-C_RESPIRATORY_INTRATHORACIC	Cancer of respiratory intrathoracic	-27.1444	27.2258	0.318759	-53.1512	69.3033	0.58349	-	-	-	0.0453482	0.738232	0.183802	0.0915692	-40.3595	24.8678	0.104598	-43.6188	27.2196	0.250223	3
ukb-d-C_SKIN	Cancer of skin	-1.74991	1.63648	0.284927	-6.73508	4.29031	0.124532	-	-	-	0.0290736	0.216775	0.135028	0.153134	-3.98524	2.12558	0.060807	-4.89624	2.82433	0.090694	41
ukb-d-CARDIAC_ARRHYTM	Cardiac arrhytmias, COPD co-morbidities	2.32076	2.74332	0.39757	-3.04242	5.95405	0.616801	-	-	-	0.0230124	0.320604	0.546598	0.5525	1.82714	3.95998	0.644511	2.00079	4.17936	0.638607	17
ukb-b-5855	Carer support indicators: No	-	-	-	-	-	-	15.5061	8.07777	0.0549088	-	-	-	-	-	-	-	-	-	-	1
ukb-d-G6_CARPTU	Carpal tunnel syndrome	7.38499	4.97921	0.138031	-8.08676	39.3674	0.844038	-	-	-	0.0409723	0.703079	0.85814	0.793875	1.22073	9.22861	0.894766	1.04193	10.1575	0.921175	8
ukb-d-1468_2	Cereal type: Biscuit cereal (e.g. Weetabix)	-1.03516	0.469798	0.0275661	-	-	-	-	-	-	-	-	-	-	-	-	-	-	-	-	2
ukb-d-1468_1	Cereal type: Bran cereal (e.g. All Bran, Branflakes)	-	-	-	-	-	-	-9.71748	5.8221	0.0951037	-	-	-	-	-	-	-	-	-	-	1
ukb-d-1468_4	Cereal type: Muesli	-5.06664	1.25943	5.74734e-05	-7.81004	9.11583	0.416504	-	-	-	0.0218323	0.766751	0.877986	0.821897	-4.92245	2.30781	0.032929	-5.21485	3.17757	0.135186	10
ukb-d-1468_5	Cereal type: Other (e.g. Cornflakes, Frosties)	3.0836	2.89728	0.287189	1.48251	24.6218	0.95367	-	-	-	0.0112157	0.949571	0.0867945	0.054785	5.21282	3.16751	0.0998225	4.72624	4.49178	0.32345	9
finn-a-AB1_INFECTIONS	Certain infectious and parasitic diseases	-	-	-	-	-	-	-1.40136	0.662458	0.0343963	-	-	-	-	-	-	-	-	-	-	1
ukb-d-M13_CERVICALGIA	Cervicalgia	-49.629	67.0619	0.459271	-	-	-	-	-	-	-	-	-	-	-	-	-	-	-	-	2
ukb-d-H7_CHALAZION	Chalazion	-11.8521	77.31	0.878157	-	-	-	-	-	-	-	-	-	-	-	-	-	-	-	-	2
ukb-b-10591	Chest pain or discomfort	-2.96848	2.79012	0.287362	-17.754	27.6176	0.548636	-	-	-	0.0819844	0.613128	0.570119	0.47901	-2.83545	3.84006	0.460279	-4.17315	5.38843	0.468067	7
ukb-d-ASTHMA_CHILD	Childhood asthma (age<16)	34.3698	7.35148	2.93636e-06	-	-	-	-	-	-	-	-	-	-	-	-	-	-	-	-	2
finn-a-H7_IRIDOCHRONIC	Chronic iridocyclitis	-0.0589579	0.0237384	0.0130044	-	-	-	-	-	-	-	-	-	-	-	-	-	-	-	-	2
ukb-b-1100	Close to major road	-	-	-	-	-	-	-7.77345	20.482	0.704297	-	-	-	-	-	-	-	-	-	-	1
finn-a-K11_COELIAC	Coeliac disease	0.0900612	0.00119978	0	0.0879961	0.149643	0.661586	-	-	-	0.00261417	0.989173	0.999812	0.992558	0.0900021	0.089265	0.313331	0.0897533	0.0936654	0.439064	3
ukb-b-9508	Coffee consumed	-0.786988	1.18316	0.505949	10.8868	11.2885	0.511532	-	-	-	-0.225598	0.487282	0.421992	0.42287	-1.18126	1.42196	0.40613	-1.47146	1.5114	0.432958	3
ukb-d-1508_1	Coffee type: Decaffeinated coffee (any type)	2.28485	4.4233	0.605471	-	-	-	-	-	-	-	-	-	-	-	-	-	-	-	-	2
ukb-d-1508_3	Coffee type: Ground coffee (include espresso, filter etc)	-1.10374	1.59533	0.489028	3.31751	9.85116	0.740417	-	-	-	-0.0345902	0.654802	0.0625068	0.0494037	-1.07148	1.92673	0.578135	-2.5497	2.74942	0.366008	19
ukb-d-1508_2	Coffee type: Instant coffee	4.57248	2.53427	0.0711904	25.3913	15.5387	0.200755	-	-	-	-0.186858	0.267259	0.437997	0.588539	6.46466	3.192	0.0428396	7.32672	4.20645	0.156512	5
[truncated: 6,352 more rows]

## Sheet: Table S5
Table S5. All MR results based on the HGI B2 dataset.
[truncated: 6,408 more rows]

## Sheet: Table S6
Table S6. All MR results based on the NEJM dataset.
[truncated: 6,249 more rows]

## Sheet: Table S7
Table S7. All MR results using FDR, based on the HGI A2 dataset.
[truncated: 1,865 more rows]

## Sheet: Table S8
Table S8. All MR results using FDR, based on the HGI B2 dataset.
[truncated: 1,781 more rows]

[truncated: 5 more sheets: Table S9, Table S10, Table S11, Table S12, Table S13]
